# Supplementary material for: Use of Changestat for Growth Rate Studies of Gut Microbiota
Source: Front Bioeng Biotechnol. 2020 Feb 7;8:24. doi: 10.3389/fbioe.2020.00024 (PMC7019180; doi:10.3389/fbioe.2020.00024)
Supplement: TABLE S1 — Abundances of bacteria in the inocula and samples from A-stat and De-stat experiments. [file Table_1.XLSX]

## Sheet: Sheet1
Table S1. Abundances of bacteria in the inoculum and samples from A-stat and De-stat experiments.
kingdom	phylum	class	order	family	genus	species	Name	Pec_batchA	Pec_batchB	Pec_batchC	Pec_chem_0.05A	Pec_chem_0.05B	Pec_chem_0.05C	Pec_chem_0.2A	Pec_chem_0.2B	Pec_chem_0.2C	Pec_A_0.066	Pec_A_0.092	Pec_A_0.096	Pec_A_0.124	Pec_A_0.142	Pec_A_0.178	Pec_A_0.2	Pec_A_0.2	Pec_D_0.178	Pec_D_0.148	Pec_D_0.127	Pec_D_0.1	Pec_D_0.075	Pec_D_0.053	Pec_D_0.053	Xyl_A_0.057	Xyl_A_0.063	Xyl_A_0.098	Xyl_A_0.12	Xyl_A_0.147	Xyl_A_0.17	Xyl_A_0.2	Xyl_A_0.2	Xyl_D_0.194	Xyl_D_0.174	Xyl_D_0.149	Xyl_D_0.123	Xyl_D_0.098	Xyl_D_0.073	Xyl_D_0.046	Xyl_D_0.046	faecal slurry	faecal slurry
Total original input reads								82683	87907	72776	93017		67002	96047	67571	69617	91527	80023	73258	75503	46792	70065	13861	57944	95723	88735	101631	97782	91479	84616	78112	66976	88845	76728	79591	88418	68159	77504	78430	87115	78277	87446	88912	65321	84543	92788	81742	76455	81385
d__Archaea	p__Euryarchaeota	c__Methanobacteria	o__Methanobacteriales	f__Methanobacteriaceae	g__Methanobrevibacter	s__smithii	Methanobrevibacter smithii	3e-05	5e-05	2e-05	0	0	0	0	0	0	0	0	0	0	0	0	0	0	0	0	0	0	0	0	0	0	0	0	0	0	7e-05	0	1e-05	0	0	0	0	0	0	0	0	0.00098	0.00234
d__Bacteria	p__Fibrobacteres_96% / Parcubacteria_2%						X-unclassified	0	0	0	0	0	0	0	0	0	0	0	0	0	0	0	0	0	0	0	0	0	0	0	0	0	0	0	0	0	0	0	0	0	0	0	0	0	0	0	0	0	0.00032
d__Bacteria	p__Actinobacteria	c__Actinobacteria	o__Corynebacteriales				X-unclassified	0	0	0	0	0	0	0	0	0	0	0	0	0	0	0	0	0	0	0	0	0	0	0	0	0	0	0	0	0	0	0	3e-05	0	0	0	0	0	0	0	0	0	0
d__Bacteria	p__Actinobacteria	c__Actinobacteria	o__Actinomycetales	f__Actinomycetaceae	g__Actinomyces	s__georgiae	Actinomyces georgiae	0	0	0	0	0	0	0	0	0	0	0	0	0	0	0	0	0	0	0	0	0	0	0	0	0	0	0	0	0	0	0	0	0	0	0	0	0	0	0	0	0	1e-05
d__Bacteria	p__Actinobacteria	c__Actinobacteria	o__Actinomycetales	f__Actinomycetaceae	g__Actinomyces	s__gerencseriae	Actinomyces gerencseriae	0	0	0	0	0	0	0	0	0	0	0	0	0	0	0	0	0	0	0	0	0	0	0	0	0	0	0	0	0	0	0	0	0	0	0	0	0	0	0	0	0	1e-05
d__Bacteria	p__Actinobacteria	c__Actinobacteria	o__Actinomycetales	f__Actinomycetaceae	g__Actinomyces	s__graevenitzii	Actinomyces graevenitzii	0	0	0	0	0	0	0	0	0	0	0	0	0	0	0	0	0	0	0	0	0	0	0	0	0	0	0	0	0	0	0	0	0	0	0	0	0	0	0	0	0	0
d__Bacteria	p__Actinobacteria	c__Actinobacteria	o__Actinomycetales	f__Actinomycetaceae	g__Actinomyces	s__lingnae	Actinomyces lingnae	0	0	0	0	0	0	0	0	0	0	0	0	0	0	0	0	0	0	0	0	0	0	0	0	0	0	0	0	0	0	0	0	0	0	0	0	0	0	0	0	4e-05	4e-05
d__Bacteria	p__Actinobacteria	c__Actinobacteria	o__Actinomycetales	f__Actinomycetaceae	g__Actinomyces	s__massiliensis	Actinomyces massiliensis	0	0	0	0	0	0	0	0	0	0	0	0	0	0	0	0	0	0	0	0	0	0	0	0	0	0	0	0	0	0	0	0	0	0	0	0	0	0	0	1e-05	0	0
d__Bacteria	p__Actinobacteria	c__Actinobacteria	o__Actinomycetales	f__Actinomycetaceae	g__Actinomyces	s__naeslundii	Actinomyces naeslundii	0	0	0	0	0	0	0	0	0	0	0	0	0	0	0	0	0	0	0	0	0	0	0	0	0	0	0	0	0	0	0	0	0	0	0	0	0	0	0	6e-05	0	0
d__Bacteria	p__Actinobacteria	c__Actinobacteria	o__Actinomycetales	f__Actinomycetaceae	g__Actinomyces	s__neuii	Actinomyces neuii	0	0	0	0	0	0	0	0	0	0	0	0	0	0	0	0	0	0	0	0	0	0	0	0	0	0	0	0	0	0	0	0	0	0	0	0	0	0	0	0	1e-05	0
d__Bacteria	p__Actinobacteria	c__Actinobacteria	o__Actinomycetales	f__Actinomycetaceae	g__Actinomyces	s__odontolyticus	Actinomyces odontolyticus	1e-05	0	1e-05	0	0	0	0	0	0	0	0	0	0	0	0	0	0	0	0	0	0	0	0	0	0	0	0	0	0	0	0	0	0	0	0	0	0	0	0	0	2e-05	0.00012
d__Bacteria	p__Actinobacteria	c__Actinobacteria	o__Actinomycetales	f__Actinomycetaceae	g__Varibaculum	s__unclassified	Varibaculum unclassified	0	0	0	0	0	0	0	0	0	0	0	0	0	0	0	0	0	0	0	0	0	0	0	0	0	0	0	0	0	0	0	0	0	0	0	0	0	0	0	0	0	0
d__Bacteria	p__Actinobacteria	c__Actinobacteria	o__Actinomycetales	f__Actinomycetaceae	g__Varibaculum	s__cambriense	Varibaculum cambriense	0	0	0	0	0	0	0	0	0	0	0	0	0	0	0	0	0	0	0	0	0	0	0	0	0	0	0	0	0	0	0	0	0	0	0	0	0	0	0	0	0	1e-05
d__Bacteria	p__Actinobacteria	c__Actinobacteria	o__Bifidobacteriales	f__Bifidobacteriaceae	g__Gardnerella		X-unclassified	1e-05	0	0	0	0	0	0	0	0	0	0	0	0	0	0	0	0	0	0	0	0	0	0	0	0	0	0	0	0	0	0	0	0	0	0	0	0	0	0	0	0	0.0001
d__Bacteria	p__Actinobacteria	c__Actinobacteria	o__Bifidobacteriales	f__Bifidobacteriaceae	g__Bifidobacterium	s__adolescentis_36% / longum_25% / breve_13% / angulatum_6% / merycicum_6% / pseudocatenulatum_4% / gallicum_2% / kashiwanohense_1%	Bifidobacterium unclassified	0.004	0.00296	0.00205	0	0	0	0	0.00091	0.00066	0	0	0	0	0	0	0	0	0	0	0	0	0	0	0	0	0	0	0	0	0	0	0	0	0	0	0	0	0	0	0	0.00041	0.10963
d__Bacteria	p__Actinobacteria	c__Actinobacteria	o__Bifidobacteriales	f__Bifidobacteriaceae	g__Bifidobacterium	s__adolescentis	Bifidobacterium adolescentis	0	0	0	0	0	0	0	0	0	0	0	0	0	0	0	0	0	0	0	0	0	0	0	0	0	0	0	0	0	0	0	0	0.01495	0.00511	0.0005	0.00027	0	0	0	0	0.05017	0
d__Bacteria	p__Actinobacteria	c__Actinobacteria	o__Bifidobacteriales	f__Bifidobacteriaceae	g__Bifidobacterium	s__angulatum	Bifidobacterium angulatum	0	0	0	0	0.00014	0	1e-05	0	0	0	0	0	0	0	0	0	0	0	0	0	0	0	0	0	0	0	0	0	0	0	0	0	0	0	0	0	0	0	0	0	0.00553	0
d__Bacteria	p__Actinobacteria	c__Actinobacteria	o__Bifidobacteriales	f__Bifidobacteriaceae	g__Bifidobacterium	s__bifidum	Bifidobacterium bifidum	0.00046	0	8e-05	6e-05	0	0.00067	0.01998	0.01877	0.01851	0.00012	7e-05	0.00021	0.00013	0	0	0	0	0.00097	0.00065	7e-05	0.00012	6e-05	0	0	0.00016	0.00024	0.00033	7e-05	0.00046	0.00051	0	0.00011	0.04355	0.02062	0.01054	0.00509	0.00219	0.00114	0.00118	0.0008	0.00613	0.00183
d__Bacteria	p__Actinobacteria	c__Actinobacteria	o__Bifidobacteriales	f__Bifidobacteriaceae	g__Bifidobacterium	s__breve	Bifidobacterium breve	0	0	0	0	0	0	0	0	0	0	0	0	0	0	0	0	0	0	0	0	0	0	0	0	0	0	0	0	0	0	0	0	0	2e-05	0	0	0	0	0	0	0	0
d__Bacteria	p__Actinobacteria	c__Actinobacteria	o__Bifidobacteriales	f__Bifidobacteriaceae	g__Bifidobacterium	s__callitrichos	Bifidobacterium callitrichos	0	0	0	0	0	0	0	0	0	0	0	0	0	0	0	0	0	0	0	0	0	0	0	0	0	0	0	0	0	0	0	0	0	0	0	0	0	0	0	0	0	0
d__Bacteria	p__Actinobacteria	c__Actinobacteria	o__Bifidobacteriales	f__Bifidobacteriaceae	g__Bifidobacterium	s__catenulatum	Bifidobacterium catenulatum	0	0	0	0	0	0	0	0	0	0	0	0	0	0	0	0	0	0	0	0	0	0	0	0	0	0	0	0	0	0	0	0	0	0	0	0	0	0	0	0	0	0
d__Bacteria	p__Actinobacteria	c__Actinobacteria	o__Bifidobacteriales	f__Bifidobacteriaceae	g__Bifidobacterium	s__choerinum	Bifidobacterium choerinum	0	0	0	0	0	0	0	0	0	0	0	0	0	0	0	0	0	0	0	0	0	0	0	0	0	0	0	0	0	0	0	0	0	0	0	0	0	0	0	0	0	0
d__Bacteria	p__Actinobacteria	c__Actinobacteria	o__Bifidobacteriales	f__Bifidobacteriaceae	g__Bifidobacterium	s__dentium	Bifidobacterium dentium	0	0	0	0	0	0	0	0	0	0	0	0	0	0	0	0	0	0	0	0	0	0	0	0	0	0	0	0	0	0	0	0	0	0	0	0	0	0	0	0	2e-05	0
d__Bacteria	p__Actinobacteria	c__Actinobacteria	o__Bifidobacteriales	f__Bifidobacteriaceae	g__Bifidobacterium	s__longum	Bifidobacterium longum	0	0	0	0	0	0	0	0	0	0	0	0	2e-05	0	0	0	0	0	0	0	0	0	0	0	0	0	0.00016	2e-05	0.00029	0.00025	0	0.0001	0.0006	0.00046	0.0001	8e-05	3e-05	0	0	0	0.02625	0
d__Bacteria	p__Actinobacteria	c__Actinobacteria	o__Bifidobacteriales	f__Bifidobacteriaceae	g__Bifidobacterium	s__pseudocatenulatum	Bifidobacterium pseudocatenulatum	0.00133	0	0	0	0	0	0	0	0	0	0	5e-05	2e-05	4e-05	1e-05	0	0	0	0	0	0	0	0	0	4e-05	2e-05	2e-05	9e-05	0.00017	9e-05	1e-05	5e-05	0.00538	0.00181	0.00024	0.00021	7e-05	2e-05	0.00038	6e-05	0.0044	0.00819
d__Bacteria	p__Actinobacteria	c__Actinobacteria	o__Bifidobacteriales	f__Bifidobacteriaceae	g__Bifidobacterium	s__reuteri	Bifidobacterium reuteri	0	0	0	0	0	0	0	0	1e-05	0	0	0	0	0	0	0	0	0	0	0	0	0	0	0	0	0	0	0	0	0	0	0	0	0	0	0	0	0	0	0	0	1e-05
d__Bacteria	p__Actinobacteria	c__Actinobacteria	o__Bifidobacteriales	f__Bifidobacteriaceae	g__Bifidobacterium	s__saguini	Bifidobacterium saguini	0	0	0	0	0	0	0	0	0	0	0	0	0	0	0	0	0	0	0	0	0	0	0	0	0	0	0	0	0	0	0	0	0	0	0	0	0	0	0	0	0	0
d__Bacteria	p__Actinobacteria	c__Actinobacteria	o__Bifidobacteriales	f__Bifidobacteriaceae	g__Bifidobacterium	s__tsurumiense	Bifidobacterium tsurumiense	0	0	0	0	0	0	0	0	4e-05	0	0	0	0	0	0	0	0	0	0	0	0	0	0	0	0	0	0	0	0	0	0	0	0	0	0	0	0	0	0	0	0	0.00212
d__Bacteria	p__Actinobacteria	c__Actinobacteria	o__Bifidobacteriales	f__Bifidobacteriaceae	g__Gardnerella	s__unclassified	Gardnerella unclassified	0	0	0	0	0	0	0	0	0	0	0	0	0	0	0	0	0	0	0	0	0	0	0	0	0	0	0	0	0	0	0	0	0	0	0	0	0	0	0	0	0	0
d__Bacteria	p__Actinobacteria	c__Actinobacteria	o__Corynebacteriales	f__Corynebacteriaceae	g__Corynebacterium	s__durum	Corynebacterium durum	0	0	0	0	0	0	0	0	0	0	0	0	0	0	0	0	0	0	0	0	0	0	0	0	0	0	0	0	0	0	0	0	0	0	0	0	0	0	0	1e-05	0	1e-05
d__Bacteria	p__Actinobacteria	c__Actinobacteria	o__Micrococcales	f__Micrococcaceae	g__Rothia	s__unclassified	Rothia unclassified	0	0	0	0	0	0	0	0	0	0	0	0	0	0	0	0	0	0	0	0	0	0	0	0	0	0	0	0	0	0	0	0	0	0	0	0	0	0	0	0	0	1e-05
d__Bacteria	p__Actinobacteria	c__Actinobacteria	o__Micrococcales	f__Micrococcaceae	g__Rothia	s__dentocariosa	Rothia dentocariosa	0	0	0	0	0	0	0	0	0	0	0	0	0	0	0	0	0	0	0	0	0	0	0	0	0	0	0	0	0	0	0	0	0	0	0	0	0	0	0	0	2e-05	0
d__Bacteria	p__Actinobacteria	c__Actinobacteria	o__Micrococcales	f__Micrococcaceae	g__Rothia	s__mucilaginosa	Rothia mucilaginosa	0	0	0	0	5e-05	0	0	0	0	0	0	0	0	0	0	0	0	0	0	0	0	0	0	0	0	0	0	0	0	0	0	0	0	0	0	0	0	0	0	0	1e-05	0
d__Bacteria	p__Actinobacteria	c__Coriobacteriia	o__Coriobacteriales	f__Coriobacteriaceae	g__unclassified_69% / Enterorhabdus_21% / Collinsella_8%		X-unclassified	0.00014	6e-05	9e-05	7e-05	0	0	1e-05	1e-05	0.00018	6e-05	2e-05	8e-05	2e-05	6e-05	0	7e-05	5e-05	0	0	0	0	3e-05	6e-05	3e-05	0	0	0	0	5e-05	0	0	7e-05	0	1e-05	0	2e-05	4e-05	0	0	7e-05	0.00562	0.00406
d__Bacteria	p__Actinobacteria	c__Coriobacteriia	o__Coriobacteriales	f__Coriobacteriaceae	g__Adlercreutzia	s__equolifaciens	Adlercreutzia equolifaciens	1e-05	0	0	0	0	1e-05	0	0	0	0	0	0	0	0	0	0	0	0	0	0	0	0	0	0	0	0	0	0	0	0	0	0	0	0	0	0	0	0	0	0	0.0003	0.00119
d__Bacteria	p__Actinobacteria	c__Coriobacteriia	o__Coriobacteriales	f__Coriobacteriaceae	g__Atopobium	s__parvulum	Atopobium parvulum	0	0	0	0	0.00184	0	0	0	0	0	0	0	0	0	0	0	0	0	0	0	0	0	0	0	0	0	0	0	0	0	0	0	0	0	0	0	0	0	0	0	0	1e-05
d__Bacteria	p__Actinobacteria	c__Coriobacteriia	o__Coriobacteriales	f__Coriobacteriaceae	g__Collinsella	s__unclassified	Collinsella unclassified	0.00029	0.00017	0.00027	4e-05	0.00383	0.00098	9e-05	0.00076	0.0018	0.00011	2e-05	0.00204	0.00243	0.0015	0.00011	7e-05	0.00017	0.00013	0.00017	8e-05	3e-05	8e-05	3e-05	0	4e-05	3e-05	8e-05	0	0.00015	0.00037	0.00091	0.00257	0.00074	0.00018	0.00034	0.00011	3e-05	3e-05	0	0	0.00103	0.0171
d__Bacteria	p__Actinobacteria	c__Coriobacteriia	o__Coriobacteriales	f__Coriobacteriaceae	g__Collinsella	s__aerofaciens	Collinsella aerofaciens	0.00068	0.00011	0.00024	0.00152	0	0.00298	0.00723	0.01982	0.01598	0.00269	0.00159	0.00942	0.00834	0.00993	0.00117	0.00022	0.0014	0.0045	0.00363	0.00172	0.00076	0.00098	0.00073	0.00037	0.00039	0.00025	0.00014	0.00018	0.00089	0.00121	0.00568	0.02455	0.03001	0.0201	0.02338	0.01169	0.00487	0.00279	0.00154	0.00097	0.0116	0.02338
d__Bacteria	p__Actinobacteria	c__Coriobacteriia	o__Coriobacteriales	f__Coriobacteriaceae	g__Collinsella	s__tanakaei	Collinsella tanakaei	0	0	0	0	0	0	0	0	0	0	0	0	0	0	0	0	0	0	0	0	0	0	0	0	0	0	0	0	0	0	0	0	0	0	0	0	0	0	0	0	0	0
d__Bacteria	p__Actinobacteria	c__Coriobacteriia	o__Coriobacteriales	f__Coriobacteriaceae	g__Coriobacteriaceae_UCG-002	s__unclassified	Coriobacteriaceae_UCG-002 unclassified	0	0	0	0	0	0	0	0	0	0	0	0	0	0	0	0	0	0	0	0	0	0	0	0	0	0	0	0	0	0	0	0	0	0	0	0	0	0	0	0	0	2e-05
d__Bacteria	p__Actinobacteria	c__Coriobacteriia	o__Coriobacteriales	f__Coriobacteriaceae	g__Eggerthella	s__unclassified	Eggerthella unclassified	0	0	0	0	0.00106	0	0	0	0	0	0	0	0	0	0	0	0	0	0	0	0	0	0	0	0	0	0	0	0	0	0	0	0	0	0	0	0	0	0	0	0	0
d__Bacteria	p__Actinobacteria	c__Coriobacteriia	o__Coriobacteriales	f__Coriobacteriaceae	g__Eggerthella	s__lenta	Eggerthella lenta	0	0	0	0	0	0.00075	0	0	0	0	0	8e-05	4e-05	8e-05	0	0	3e-05	0	0	0	0	2e-05	0	0	0	2e-05	0	1e-05	8e-05	9e-05	3e-05	0.00041	0	0	0	0	0	0	0	0	4e-05	1e-05
d__Bacteria	p__Actinobacteria	c__Coriobacteriia	o__Coriobacteriales	f__Coriobacteriaceae	g__Eggerthella	s__sinensis	Eggerthella sinensis	0	0	0	0	0	0	0	0	0	0	0	0	0	0	0	0	0	0	0	0	0	0	0	0	0	0	0	0	0	0	0	0	0	0	0	0	0	0	0	0	0	0
d__Bacteria	p__Actinobacteria	c__Coriobacteriia	o__Coriobacteriales	f__Coriobacteriaceae	g__Enterorhabdus	s__unclassified	Enterorhabdus unclassified	0	0	0	0	0.00155	0	0	4e-05	0	0	0	0	0	0	0	0	0	0	0	0	0	0	0	0	0	0	0	0	0	0	0	0	0	0	0	0	0	0	0	0	0	0
d__Bacteria	p__Actinobacteria	c__Coriobacteriia	o__Coriobacteriales	f__Coriobacteriaceae	g__Gordonibacter	s__pamelaeae_49% / faecihominis_49%	Gordonibacter unclassified	1e-05	0	0	0	0	0.00046	0	0	0	0	0	0	0	0	0	0	0	0	0	0	0	0	0	0	0	0	0	0	0	0	0	0	0	0	0	0	0	0	0	0	0	8e-05
d__Bacteria	p__Actinobacteria	c__Coriobacteriia	o__Coriobacteriales	f__Coriobacteriaceae	g__Gordonibacter	s__pamelaeae	Gordonibacter pamelaeae	0	0	0	0	0	0	0	0	0	0	0	0	2e-05	2e-05	0	0	0	0	0	0	0	0	0	0	0	1e-05	0	0	9e-05	0.00013	0.00019	9e-05	0	0	0	0	0	0	0	0	0	0
d__Bacteria	p__Actinobacteria	c__Coriobacteriia	o__Coriobacteriales	f__Coriobacteriaceae	g__Senegalimassilia	s__unclassified	Senegalimassilia unclassified	1e-05	1e-05	0	0	0	0	0	0	0	0	0	2e-05	0	0	0	0	0	0	0	0	0	0	0	0	0	2e-05	0	0	1e-05	3e-05	0	0	0	0	0	0	0	0	0	0	0.0001	0.00047
d__Bacteria	p__Actinobacteria	c__Coriobacteriia	o__Coriobacteriales	f__Coriobacteriaceae	g__Senegalimassilia	s__anaerobia	Senegalimassilia anaerobia	0.00029	0.00012	0.00017	5e-05	0	0.0012	0	0.00457	0.00471	0	5e-05	0.00179	0.00267	0.00316	0.00091	7e-05	0.00026	0	0	0	0	0	0	0	0.00039	0.00093	0.00083	0.00055	0.00038	0.00235	0.00172	0.00081	0	5e-05	8e-05	0	0	0	0	0	0.00242	0.00704
d__Bacteria	p__Actinobacteria	c__Coriobacteriia	o__Coriobacteriales	f__Coriobacteriaceae	g__Slackia	s__equolifaciens	Slackia equolifaciens	0	0	0	0	0	0	0	0	0	0	0	0	0	0	0	0	0	0	0	0	0	0	0	0	0	0	0	0	0	0	0	0	0	0	0	0	0	0	0	0	0	2e-05
d__Bacteria	p__Actinobacteria	c__Coriobacteriia	o__Coriobacteriales	f__Coriobacteriaceae	g__Slackia	s__isoflavoniconvertens	Slackia isoflavoniconvertens	1e-05	0	1e-05	0	1e-05	0	0	1e-05	1e-05	0	0	0	0	0	0	0	0	0	0	0	0	0	0	0	0	0	0	0	0	1e-05	0.00014	0.0001	0	0	0	0	0	0	0	0	0.00028	0.00048
d__Bacteria	p__Actinobacteria	c__Coriobacteriia	o__Coriobacteriales	f__Coriobacteriaceae	g__Slackia	s__piriformis	Slackia piriformis	0	0	0	0	0	0	1e-05	0	0	0	0	0	4e-05	0	0	0	0	1e-05	6e-05	3e-05	0	0	0	0	0	0	0	0	0	0	0	0	0	0	0	0	0	3e-05	0	0	0	1e-05
d__Bacteria	p__Bacteroidetes	c__Bacteroidia	o__Bacteroidales	f__Bacteroidales_S24-7_group_69% / unclassified_24% / Rikenellaceae_2% / ratAN060301C_1%			X-unclassified	1e-05	0	0	2e-05	0.06913	0	0.00024	0.00013	1e-05	0.00011	0	0.00011	0	0	0.00033	0	3e-05	0.00086	0.0031	5e-05	0	0	8e-05	0.00022	1e-05	0	1e-05	0	2e-05	0	0.00135	0	0	0	0.00189	0	0	0.00039	0.00075	0.00013	0.00255	0.00037
d__Bacteria	p__Bacteroidetes	c__Bacteroidia	o__Bacteroidales	f__Bacteroidaceae	g__Bacteroides	s__thetaiotaomicron_30% / unclassified_25% / faecis_12% / finegoldii_7% / ovatus_6% / faecichinchillae_6% / xylanisolvens_5% / stercorirosoris_3% / oleiciplenus_1%	Bacteroides unclassified	0	0	0.00112	0.01214	0	0.16949	0.01781	0.22207	0.04936	0.00837	0.01142	0.00983	0.00937	0.00546	0.00163	0.00044	0.00049	0.01819	0.01932	0.01756	0.02038	0.02849	0.01604	0.0134	0.00467	0.00366	0.00318	0.0028	0.00197	0.00097	0	0.00127	0.06487	0.04019	0.02237	0.02047	0.01787	0.01257	0.01265	0.00653	0.00285	0.00646
d__Bacteria	p__Bacteroidetes	c__Bacteroidia	o__Bacteroidales	f__Bacteroidaceae	g__Bacteroides	s__acidifaciens	Bacteroides acidifaciens	0	0	0	0	0.00549	0	0	0.00226	0.00544	0	0	0	0	0	0	0	0	0	0	0	0	0	0	0	0.00016	0.00013	0.0001	0	0.00013	7e-05	0	0	0	0	0	0	0	0	0	0	0	0
d__Bacteria	p__Bacteroidetes	c__Bacteroidia	o__Bacteroidales	f__Bacteroidaceae	g__Bacteroides	s__caccae	Bacteroides caccae	0	0	0.00019	0.01214	0.00424	0.00234	0.06429	0.04866	0.10015	0.01512	0.0218	0.01827	0.03073	0.04283	0.03326	0.00969	0.00621	0.07409	0.07051	0.0688	0.04928	0.03906	0.03273	0.03819	0.00024	0.00054	0.00014	0.00019	0	0.00024	0	0	0.03015	0.03207	0.00989	0.00512	0.00381	0.00344	0.00115	0.00073	0.0039	0.001
d__Bacteria	p__Bacteroidetes	c__Bacteroidia	o__Bacteroidales	f__Bacteroidaceae	g__Bacteroides	s__cellulosilyticus	Bacteroides cellulosilyticus	0	0.00038	0	0.04336	0	0.04027	0.06037	0.03268	0.01024	0.04414	0.04226	0.03241	0.03361	0.03311	0.05146	0.07245	0.15833	0.08977	0.08838	0.08092	0.07639	0.08787	0.05553	0.04814	0.06544	0.0762	0.08442	0.10794	0.09681	0.05961	0.00713	0.00705	0.00796	0.01014	0.03232	0.046	0.0744	0.064	0.06398	0.05066	0.00061	0
d__Bacteria	p__Bacteroidetes	c__Bacteroidia	o__Bacteroidales	f__Bacteroidaceae	g__Bacteroides	s__clarus	Bacteroides clarus	0	0	0	0	0	0	0	0	0	0	0	0	0	0	0	0	0	0	0	0	0	2e-05	0	0	0	0	0	0	0	0	0	0	0	0	0	0	0	0	0	0	0.00535	0.00173
d__Bacteria	p__Bacteroidetes	c__Bacteroidia	o__Bacteroidales	f__Bacteroidaceae	g__Bacteroides	s__coprophilus	Bacteroides coprophilus	0	0	0	0	0.00228	0	0	0	0	0	0	0	0	0	0	0	0	0	0	0	0	0	0	0	0	0	0	0	0	0	0	0	0	0	0	0	0	0	0	0	2e-05	0
d__Bacteria	p__Bacteroidetes	c__Bacteroidia	o__Bacteroidales	f__Bacteroidaceae	g__Bacteroides	s__dorei	Bacteroides dorei	0	0	0	0	0	0	0	0.00086	0	0	0	0	0	0	0	0	0	0	0	0	0	0	0	0	0	0	0	0	0	0	0	0	0	0	0	0	0	0	0	0	0	0.00344
d__Bacteria	p__Bacteroidetes	c__Bacteroidia	o__Bacteroidales	f__Bacteroidaceae	g__Bacteroides	s__eggerthii	Bacteroides eggerthii	0	0	0	0	0.06462	0	0	0	0	0	0	0	0	0	0	0	0	0	0	0	0	0	0	0	0	0	0	0	0	0	0	0	0	0	0	0	0	0	0	0	0.00366	0.00134
d__Bacteria	p__Bacteroidetes	c__Bacteroidia	o__Bacteroidales	f__Bacteroidaceae	g__Bacteroides	s__faecichinchillae	Bacteroides faecichinchillae	0	0	0	0	0	0	0	0	0	0	0	0	0	0	0	0	0	0	0	0	0	0	0	0	0	0	0	0	0	0	0	0	0	0	0	0	0	0	0	0	0	0
d__Bacteria	p__Bacteroidetes	c__Bacteroidia	o__Bacteroidales	f__Bacteroidaceae	g__Bacteroides	s__faecis	Bacteroides faecis	0	0	0	0	0	0	0.00112	0	0	0	0	0	0	0	0	0	0	0	0	0	0	0	0	0	0	0	0	0	0	0	0	0	0	0	0	0	0	0	0	0	0	0
d__Bacteria	p__Bacteroidetes	c__Bacteroidia	o__Bacteroidales	f__Bacteroidaceae	g__Bacteroides	s__finegoldii	Bacteroides finegoldii	0.00035	0	0	0	9e-05	0	0.00258	0	0	0	0	0	0	0	0	0	0	0	0.00062	0.00032	4e-05	0	0	0	0	0	0	0	0	0	0	0	0	0	0	6e-05	4e-05	0	0	0	5e-05	0
d__Bacteria	p__Bacteroidetes	c__Bacteroidia	o__Bacteroidales	f__Bacteroidaceae	g__Bacteroides	s__fragilis	Bacteroides fragilis	0	0	8e-05	0.00031	0	0	0.01144	0.01069	0.01329	0.00027	0.00013	0	0.00012	6e-05	8e-05	0	0	0.01224	0.0047	0.00265	0.00117	0.00072	0.00109	0.00103	0.00205	0.00211	0.00277	0.00195	0.00164	7e-05	0	5e-05	0.04735	0.03675	0.02481	0.01413	0.01337	0.01063	0.00811	0.004	0.00024	0
d__Bacteria	p__Bacteroidetes	c__Bacteroidia	o__Bacteroidales	f__Bacteroidaceae	g__Bacteroides	s__intestinalis	Bacteroides intestinalis	0	0	0	0	0	0	0	0	0	0	0	0	0	0	0	0	0	0	0	0	0	0	0	0	0	0	0	0	0	0	0	0	0	0	0	0	0	0	0	0	0	0
d__Bacteria	p__Bacteroidetes	c__Bacteroidia	o__Bacteroidales	f__Bacteroidaceae	g__Bacteroides	s__massiliensis	Bacteroides massiliensis	0	0	0	0	0.00244	0	0.00034	1e-05	0.00022	0	0	0	0	0	0	0	0	8e-05	5e-05	0	2e-05	0	0	0	0	0	0	0	0	0	0	0	0	0	0	0	0	0	0	0	0	2e-05
d__Bacteria	p__Bacteroidetes	c__Bacteroidia	o__Bacteroidales	f__Bacteroidaceae	g__Bacteroides	s__nordii	Bacteroides nordii	2e-05	0	0	0.00091	0	0	6e-05	0	0	0.00171	0.00219	0.00307	0.0045	0.00599	0.00304	0.00125	0.00064	0.0002	0.00068	0.00099	0.00175	0.00112	0.004	0.0081	0.00046	0.00041	0.00012	0.00013	0.00013	0.00027	5e-05	0.0001	0	0	0	0	0	0	0	0	0	0
d__Bacteria	p__Bacteroidetes	c__Bacteroidia	o__Bacteroidales	f__Bacteroidaceae	g__Bacteroides	s__oleiciplenus	Bacteroides oleiciplenus	0	0	0	0	0.30313	0	0	0	0	0	0	0	0	0	0	0	0	0	0	0	0	0	0	0	0	0	0	0	0	0	0	0	0	0	0	0	0	0	0	0	0	0
d__Bacteria	p__Bacteroidetes	c__Bacteroidia	o__Bacteroidales	f__Bacteroidaceae	g__Bacteroides	s__ovatus	Bacteroides ovatus	0	0	0.00062	0.08693	0	0.08163	0.16218	0	0	0.03146	0.03224	0.03017	0.03094	0.02195	0.01031	0.00384	0.00825	0.10898	0.09868	0.10267	0.06516	0.03385	0.0253	0.01545	0.33414	0.33997	0.34017	0.22653	0.14445	0.04114	0.01797	0.03527	0.22198	0.30555	0.4002	0.40674	0.39184	0.40944	0.38664	0.40535	0.00599	0
d__Bacteria	p__Bacteroidetes	c__Bacteroidia	o__Bacteroidales	f__Bacteroidaceae	g__Bacteroides	s__plebeius	Bacteroides plebeius	0	0	0	0	0	0	0	0	0	0	0	0	0	0	0	0	0	0	0	1e-05	0	0	0	0	0	0	0	0	0	0	0	0	0	0	0	0	0	0	0	0	5e-05	9e-05
d__Bacteria	p__Bacteroidetes	c__Bacteroidia	o__Bacteroidales	f__Bacteroidaceae	g__Bacteroides	s__rodentium	Bacteroides rodentium	0	0	0	0	0	0	0	0	0	0	0	0	0	0	0	0	0	0	0	0	0	0	0	0	0	0	0	0	0	0	0	0	0	0	0	0	0	0	0	0	0	0
d__Bacteria	p__Bacteroidetes	c__Bacteroidia	o__Bacteroidales	f__Bacteroidaceae	g__Bacteroides	s__salyersiae	Bacteroides salyersiae	0	0	0	0.0005	0	0	0.00026	0	0	0.00075	0.00029	0.00015	0	4e-05	0	0	0	0.00023	0.0004	0.00012	9e-05	5e-05	1e-05	0	0	0	0	0	0	0	0	0	0	0	0	0	0	0	0	0	0	0
d__Bacteria	p__Bacteroidetes	c__Bacteroidia	o__Bacteroidales	f__Bacteroidaceae	g__Bacteroides	s__stercorirosoris	Bacteroides stercorirosoris	0	0	0	0	0	0.01468	0	0	0.00552	0	0	0	0	0	0	0	0	0.00013	0	0	0	0	0	0	0	0	0	0	0	0	0	0	0	0	0	0	0	0	0	0	0	0
d__Bacteria	p__Bacteroidetes	c__Bacteroidia	o__Bacteroidales	f__Bacteroidaceae	g__Bacteroides	s__thetaiotaomicron	Bacteroides thetaiotaomicron	0	0.00027	0	0.0581	0.00738	0	0.06255	0	0.14522	0.07728	0.09206	0.09678	0.09423	0.06118	0.0158	0.00177	0.00429	0.11111	0.12172	0.1402	0.14397	0.16387	0.10964	0.03445	0.01315	0.01165	0.01305	0.01135	0.0123	0.01302	0.01174	0.05875	0.01331	0.0172	0.02643	0.03317	0.04808	0.04877	0.03163	0.01688	0.00133	0.00059
d__Bacteria	p__Bacteroidetes	c__Bacteroidia	o__Bacteroidales	f__Bacteroidaceae	g__Bacteroides	s__uniformis	Bacteroides uniformis	7e-05	0	0.00012	0.00428	0.06777	0.01006	0.00765	0.02348	0.03792	0.00574	0.00973	0.00973	0.01059	0.00892	0.00547	0.00192	0.00645	0.00568	0.00273	0.00211	0.00275	0.00527	0.01413	0.02736	0.00205	0.00216	0.002	0.00137	0.00172	0.00069	0.00033	0.00023	0.00439	0.00524	0.0042	0.00348	0.00413	0.00422	0.00307	0.00208	0.02548	0.00698
d__Bacteria	p__Bacteroidetes	c__Bacteroidia	o__Bacteroidales	f__Bacteroidaceae	g__Bacteroides	s__vulgatus	Bacteroides vulgatus	0	0	0	0.04848	0	0.09846	0.04529	0.02036	0.03494	0.05854	0.07424	0.05511	0.03097	0.01348	0.0045	0.00096	0.00057	0.04095	0.03863	0.04201	0.06457	0.05359	0.06409	0.11488	0.00175	0.00267	0.0015	0.00373	0.0017	0.00161	0	0	0.0603	0.04393	0.03779	0.03522	0.03237	0.02316	0.02577	0.0203	0.02193	0.00549
d__Bacteria	p__Bacteroidetes	c__Bacteroidia	o__Bacteroidales	f__Bacteroidaceae	g__Bacteroides	s__xylanisolvens	Bacteroides xylanisolvens	0	0	0	0	0	0	0	0	0.05791	0.00172	0	0.00061	0	0	0.00057	0	0	0	0	0	0	0	0	0	0	0	0	0	0	0	0	0	0	0	0	0	0	0	0	0	0.00321	0
d__Bacteria	p__Bacteroidetes	c__Bacteroidia	o__Bacteroidales	f__Bacteroidales_S24-7_group	g__unclassified		X-unclassified	0	0	0	0	0.00016	9e-05	0	0	4e-05	0	0	0	0	0	0	0.00014	0	0	0	0	0	0	0	0	0	0	0	0	0	0	0	0.00325	0	0.00055	0	0.0079	0.00128	0	0	0	0.00304	0.00097
d__Bacteria	p__Bacteroidetes	c__Bacteroidia	o__Bacteroidales	f__Porphyromonadaceae	g__unclassified_97% / Microbacter_2%		X-unclassified	0	0	0	0	0	0.00018	0.0004	0.00015	0.00045	3e-05	7e-05	1e-05	0	0	0	0	0	0	4e-05	3e-05	0	0	0	0	0.00021	0	0	0	1e-05	0	0	0	8e-05	3e-05	0	0.00021	0.00018	0.00014	5e-05	0	0.00025	0.00027
d__Bacteria	p__Bacteroidetes	c__Bacteroidia	o__Bacteroidales	f__Porphyromonadaceae	g__Barnesiella	s__unclassified	Barnesiella unclassified	0	0	0	0	0	0	0	0	0	0	0	0	0	0	0	0	0	0	0	0	0	0	0	0	0	0	0	0	0	0	0	0	0	0	0	0	0	0	0	0	0.00016	0.00059
d__Bacteria	p__Bacteroidetes	c__Bacteroidia	o__Bacteroidales	f__Porphyromonadaceae	g__Barnesiella	s__intestinihominis	Barnesiella intestinihominis	0	0	0	0	0.00043	0	0	0	0	0	0	0	0	0	0	0	0	0	0	0	0	0	0	0	0	0	0	0	0	0	0	0	0	0	0	0	0	0	0	0	0.0067	0
d__Bacteria	p__Bacteroidetes	c__Bacteroidia	o__Bacteroidales	f__Porphyromonadaceae	g__Butyricimonas	s__unclassified	Butyricimonas unclassified	1e-05	0	0	0.00013	0	0.0001	0	0	0	0	0.00033	0.00022	0.00024	0.00011	0.0001	0	0	0	0	0	1e-05	1e-05	0.00018	0.0005	0.00039	0.00045	0.00024	5e-05	0	3e-05	0	0	0	0	0	0	0	0	0	4e-05	0.00048	1e-05
d__Bacteria	p__Bacteroidetes	c__Bacteroidia	o__Bacteroidales	f__Porphyromonadaceae	g__Butyricimonas	s__faecihominis	Butyricimonas faecihominis	0	0	0	0	0	0	0	0	0	0	0	0	0	0	0	0	0	0	0	0	0	0	0	0	0	2e-05	0	0	0	0	0	0	0	0	0	0	0	0	0	0	0.00024	9e-05
d__Bacteria	p__Bacteroidetes	c__Bacteroidia	o__Bacteroidales	f__Porphyromonadaceae	g__Butyricimonas	s__paravirosa	Butyricimonas paravirosa	0	0	0	0	0	0	0	0	0	0	0	0	0	0	0	0	0	0	0	0	0	0	0	0	0	0	0	0	0	0	0	0	0	0	0	0	0	0	0	0	1e-05	0
d__Bacteria	p__Bacteroidetes	c__Bacteroidia	o__Bacteroidales	f__Porphyromonadaceae	g__Butyricimonas	s__virosa	Butyricimonas virosa	0	0	0	8e-05	0	0.0001	0	0	0	1e-05	0.00019	4e-05	0.00015	2e-05	0.00011	0	1e-05	0	0	0	0	2e-05	7e-05	0.00025	6e-05	0.00024	0.0001	2e-05	9e-05	0	0	0	0	0	0	0	0	0	0	0	9e-05	0
d__Bacteria	p__Bacteroidetes	c__Bacteroidia	o__Bacteroidales	f__Porphyromonadaceae	g__Coprobacter	s__fastidiosus	Coprobacter fastidiosus	0	0	0	0	0	0	0	0	0	0	0	0	0	0	0	0	0	0	0	0	0	0	0	0	0	0	0	0	0	0	0	0	0	0	0	0	0	0	0	0	0.00014	4e-05
d__Bacteria	p__Bacteroidetes	c__Bacteroidia	o__Bacteroidales	f__Porphyromonadaceae	g__Odoribacter	s__splanchnicus	Odoribacter splanchnicus	0	0	0	0	0	0	0	0	0	0	0	0	0	0	0	0	0	0	0	0	0	0	0	0	0	0	0	0	0	0	0	0	0	0	0	0	0	0	0	0	0.00044	0.00016
d__Bacteria	p__Bacteroidetes	c__Bacteroidia	o__Bacteroidales	f__Porphyromonadaceae	g__Parabacteroides	s__unclassified_93% / johnsonii_5% / distasonis_1%	Parabacteroides unclassified	0	0	0	0	0.00097	0	0	0	0	2e-05	0	0	0	2e-05	0	0	0	0	0	0	0	0	0	1e-05	0	0	0	0	0	0	0	1e-05	0	0	0	0	1e-05	0	0	0	0	2e-05
d__Bacteria	p__Bacteroidetes	c__Bacteroidia	o__Bacteroidales	f__Porphyromonadaceae	g__Parabacteroides	s__distasonis	Parabacteroides distasonis	3e-05	1e-05	0	0	1e-05	0.00067	3e-05	0.00078	6e-05	2e-05	3e-05	2e-05	0	0	0	0	0	8e-05	1e-05	0	1e-05	0	4e-05	1e-05	0	0	0	0	0	0	0	0	1e-05	0	0	1e-05	0	2e-05	8e-05	7e-05	4e-05	0.0005
d__Bacteria	p__Bacteroidetes	c__Bacteroidia	o__Bacteroidales	f__Porphyromonadaceae	g__Parabacteroides	s__goldsteinii	Parabacteroides goldsteinii	0	0	0	4e-05	0	1e-05	0	0	0	0.00022	0.00013	0	1e-05	2e-05	0	0	0	0	0	0	0	0	9e-05	0.00033	0.00058	0.001	0.0011	0.00121	0.00154	0.00071	0.00039	0.00463	0	0	0	0	0	0	0	0	1e-05	0
d__Bacteria	p__Bacteroidetes	c__Bacteroidia	o__Bacteroidales	f__Porphyromonadaceae	g__Parabacteroides	s__johnsonii	Parabacteroides johnsonii	0	0	0	0	9e-05	0	0	0	0	0	2e-05	4e-05	2e-05	0	0.00014	7e-05	0.00039	0	0	0	0	0	0	0	0	0	0	0	0	0	0	0	0	0	0	0	0	0	0	0	0.00086	0.00031
d__Bacteria	p__Bacteroidetes	c__Bacteroidia	o__Bacteroidales	f__Porphyromonadaceae	g__Parabacteroides	s__merdae	Parabacteroides merdae	1e-05	1e-05	0	0.00387	0	0.00011	0.00052	0	0	0.00157	0.00144	0.00091	0.00109	0.00075	0.00122	7e-05	0.00105	0.00027	9e-05	0.00023	0.0002	0.00036	0.00048	0.00054	0.00061	0.00078	0.00043	0.00033	0.00026	0.00028	6e-05	0.00033	0	0	0	3e-05	6e-05	3e-05	7e-05	0.00016	0.00315	0.00065
d__Bacteria	p__Bacteroidetes	c__Bacteroidia	o__Bacteroidales	f__Prevotellaceae	g__unclassified_74% / Prevotella_7_19% / Prevotellaceae_UCG-001_5%		X-unclassified	0	0	0	0	0	0	0	0	0	0	0	0	0	0	0	0	0	0	0	0	0	0	0	0	0	0	0	0	0	0	0	0	0	0	0	0	0	0	0	0	0.00012	5e-05
d__Bacteria	p__Bacteroidetes	c__Bacteroidia	o__Bacteroidales	f__Prevotellaceae	g__Alloprevotella	s__unclassified	Alloprevotella unclassified	0	0	0	0	0	0	0	0	0	0	0	0	0	0	0	0	0	2e-05	1e-05	0	0	0	0	0	1e-05	0	0	0	0	0	0	0	0	0	0	0	0	0	0	0	0.0045	0.00176
d__Bacteria	p__Bacteroidetes	c__Bacteroidia	o__Bacteroidales	f__Prevotellaceae	g__Paraprevotella	s__unclassified	Paraprevotella unclassified	0	0	0	0	0	0	0	0	0	0	0	0	0	0	0	0	0	0	0	0	0	0	0	0	0	0	0	0	0	0	0	0	0	0	0	0	0	0	0	0	0.00331	0.00077
d__Bacteria	p__Bacteroidetes	c__Bacteroidia	o__Bacteroidales	f__Prevotellaceae	g__Paraprevotella	s__clara	Paraprevotella clara	0	0	0	0	0	0	0	0	0	0	0	0	0	0	0	0	0	0	0	0	0	0	0	0	0	0	0	0	0	0	0	0	0	0	0	0	0	0	0	0	0.00678	0.002
d__Bacteria	p__Bacteroidetes	c__Bacteroidia	o__Bacteroidales	f__Prevotellaceae	g__Prevotella_2	s__unclassified	Prevotella_2 unclassified	0	0	0	0	0	0	1e-05	0	0	0	0	0	0	0	0	0	0	1e-05	0	0	0	0	0	0	1e-05	0	0	0	1e-05	0	0	1e-05	0	1e-05	0	0	0	0	1e-05	1e-05	0.00045	0.0006
d__Bacteria	p__Bacteroidetes	c__Bacteroidia	o__Bacteroidales	f__Prevotellaceae	g__Prevotella_6	s__corporis	Prevotella_6 corporis	0	0	0	0	0	0	0	0	0	0	0	0	0	0	0	0	0	0	0	0	0	0	0	0	0	0	0	0	0	0	0	0	0	0	0	0	0	0	0	0	2e-05	0
d__Bacteria	p__Bacteroidetes	c__Bacteroidia	o__Bacteroidales	f__Prevotellaceae	g__Prevotella_7	s__unclassified	Prevotella_7 unclassified	0	0	0	0	0	0	0	0	0	0	0	0	0	0	0	0	0	0	0	0	0	0	0	0	0	0	0	0	0	0	0	0	0	0	0	0	0	0	0	0	0.00134	0.00012
d__Bacteria	p__Bacteroidetes	c__Bacteroidia	o__Bacteroidales	f__Prevotellaceae	g__Prevotella_9	s__unclassified	Prevotella_9 unclassified	0	0	0	0	0	0	0	0	0	0	0	0	0	0	0	0	0	0	0	0	0	0	0	0	0	0	0	0	0	0	0	0	0	0	0	0	0	0	0	0	0.0046	0.00125
d__Bacteria	p__Bacteroidetes	c__Bacteroidia	o__Bacteroidales	f__Prevotellaceae	g__Prevotella_9	s__copri	Prevotella_9 copri	0	0	0	0	0	0	0	0	0	0	0	0	0	0	0	0	0	0	0	0	0	0	0	0	0	0	0	0	0	0	0	0	0	0	0	0	0	0	0	0	0.01443	0.00731
d__Bacteria	p__Bacteroidetes	c__Bacteroidia	o__Bacteroidales	f__Rikenellaceae	g__Rikenellaceae_RC9_gut_group		X-unclassified	0	0	0	0	0.00684	0	0	0	0	0	0	0	0	0	0	0	0	0	0	0	0	0	0	0	0	0	0	0	0	0	0	0	0	0	0	0	0	0	0	0	0.00086	0
d__Bacteria	p__Bacteroidetes	c__Bacteroidia	o__Bacteroidales	f__Rikenellaceae	g__Alistipes	s__unclassified	Alistipes unclassified	4e-05	0	7e-05	0.00013	0.00039	0.00959	4e-05	0	0.00011	0.0001	0.0001	0	5e-05	0	0	0	0	5e-05	4e-05	0.00011	4e-05	0.00017	7e-05	0.00015	6e-05	8e-05	0	0	0	9e-05	6e-05	0.0001	0	0	0	0	0	0	0	0.00044	0.00566	0.00094
d__Bacteria	p__Bacteroidetes	c__Bacteroidia	o__Bacteroidales	f__Rikenellaceae	g__Alistipes	s__finegoldii	Alistipes finegoldii	0	0	0	3e-05	8e-05	0.0003	0	0	1e-05	2e-05	0	4e-05	0	0	1e-05	0	5e-05	0	2e-05	0	0	0	0	0	0.00046	0.00041	0.00037	0.00029	0.00017	0.00027	0.00031	0.00035	0	0	0	0	0	0	0	0	0.00145	0.00025
d__Bacteria	p__Bacteroidetes	c__Bacteroidia	o__Bacteroidales	f__Rikenellaceae	g__Alistipes	s__indistinctus	Alistipes indistinctus	0	0	0	0	0	3e-05	0	0	0	0	0	0	0	0	0	0	0	0	0	0	0	0	0	5e-05	0	0	0	0	0	0	0	0	0	0	0	0	0	0	0	0	5e-05	0
d__Bacteria	p__Bacteroidetes	c__Bacteroidia	o__Bacteroidales	f__Rikenellaceae	g__Alistipes	s__massiliensis	Alistipes massiliensis	0	0	0	0	0	0	0	0	0	0	0	0	0	0	0	0	0	0	0	0	0	0	0	0	0	0	0	0	0	0	0	0	0	0	0	0	0	0	0	0	0.00013	5e-05
d__Bacteria	p__Bacteroidetes	c__Bacteroidia	o__Bacteroidales	f__Rikenellaceae	g__Alistipes	s__putredinis	Alistipes putredinis	0	0	0	0	0	0	0	0	0	0	0	1e-05	0	0	0	0	0	0	0	0	0	0	0	0	0	0	0	0	0	0	0	0	0	0	0	0	0	0	0	0	0.01315	0.00229
d__Bacteria	p__Bacteroidetes	c__Bacteroidia	o__Bacteroidales	f__Rikenellaceae	g__Alistipes	s__senegalensis	Alistipes senegalensis	0	0	0	0	0	0	0	0	0	0	0	0	0	0	0	0	0	0	0	0	0	0	0	0	0	0	0	0	2e-05	0	0	0	0	0	0	0	0	0	0	0	0.00024	0
d__Bacteria	p__Bacteroidetes	c__Bacteroidia	o__Bacteroidales	f__Rikenellaceae	g__Alistipes	s__shahii	Alistipes shahii	0	0	0	0.00015	0	0.00062	0	0	0	0.00017	0	0.00025	9e-05	0	0	0	0	0	0	0	0	0	0	0	0	0	0	0	0	0	0	0	0	0	0	0	0	0	0	0	0.00214	0.00052
d__Bacteria	p__Bacteroidetes	c__Bacteroidia	o__Bacteroidales	f__Rikenellaceae	g__Rikenellaceae_RC9_gut_group	s__unclassified	Rikenellaceae_RC9_gut_group unclassified	0	0	0	0	2e-05	0	0	0	0	0	0	0	0	0	0	0	0	0	0	0	0	0	0	0	0	0	0	0	0	0	0	0	0	0	0	0	0	0	0	0	0	0.00013
d__Bacteria	p__Bacteroidetes	c__Bacteroidia	o__Bacteroidales	f__ratAN060301C	g__unclassified		X-unclassified	0	0	0	0	0	3e-05	0	0	0	0	0	0	0	0	0	0	0	0	0	0	0	0	0	0	0	0	0	0	0	0	0	0	0	0	0	0	0	0	0	0	0	0
d__Bacteria	p__Bacteroidetes	c__Flavobacteriia	o__Flavobacteriales	f__Cryomorphaceae	g__Owenweeksia	s__unclassified	Owenweeksia unclassified	0	0	0	0	0	0	0	0	0	0	0	0	0	0	0	0	0	0	0	0	0	0	0	0	0	0	0	0	0	0	0	0	0	0	0	0	0	0	0	0	0	0
d__Bacteria	p__Bacteroidetes	c__Flavobacteriia	o__Flavobacteriales	f__Flavobacteriaceae	g__Flavobacterium	s__psychrolimnae_15% / hercynium_12% / johnsoniae_11% / chungangense_10% / glaciei_10% / cauliformis_10% / granuli_10% / tiangeerense_10% / aquidurense_2% / unclassified_2%	Flavobacterium unclassified	0	0	0	0	0	0	0	0	0	0	0	0	0	0	0	0	0	0	0	0	0	0	0	0	0	0	0	0	0	0	0	0	0	0	0	0	0	0	0	0	0	0
d__Bacteria	p__Bacteroidetes	c__Flavobacteriia	o__Flavobacteriales	f__Flavobacteriaceae	g__Flavobacterium	s__saccharophilum	Flavobacterium saccharophilum	0	0	0	0	0	0	0	0	0	0	0	0	0	0	0	0	0	3e-05	0	0	0	0	0	0	0	0	0	0	0	0	0	0	0	0	0	0	0	0	0	0	0	0
d__Bacteria	p__Cyanobacteria	c__Chloroplast	o__unclassified	f__unclassified	g__Athetis_33% / Cynomorium_33% / Malus_33%		X-unclassified	0	0	0	0	0	0	0	0	0	0	0	0	0	0	0	0	0	0	0	0	0	0	0	0	0	0	0	0	0	0	0	0	0	0	0	0	0	0	0	0	0	6e-05
d__Bacteria	p__Cyanobacteria	c__Chloroplast	o__unclassified	f__unclassified	g__Solanum	s__lycopersicum	Solanum lycopersicum	0	0	0	0	0	0	0	0	0	0	0	0	0	0	0	0	0	0	0	0	0	0	0	0	0	0	0	0	0	0	0	0	0	0	0	0	0	0	0	0	5e-05	0
d__Bacteria	p__Cyanobacteria	c__Melainabacteria	o__Gastranaerophilales	f__unclassified			X-unclassified	0	0	0	0	0	0	0	0	0	0	0	0	0	0	0	7e-05	0	1e-05	0	0	1e-05	0	0	1e-05	0	0	0	0	0	0	0	1e-05	0	0	0	0	0	0	0	0	0.0006	0.00021
d__Bacteria	p__Cyanobacteria	c__Melainabacteria	o__Gastranaerophilales	f__Clostridiaceae	g__unclassified		X-unclassified	0	0	0	0	0	0	0	0	0	0	0	0	0	0	0	0	0	0	0	0	0	0	0	0	0	0	0	0	0	0	0	0	0	0	0	0	0	0	0	0	0	0
d__Bacteria	p__Elusimicrobia	c__Elusimicrobia	o__Elusimicrobiales	f__Elusimicrobiaceae	g__Elusimicrobium	s__unclassified	Elusimicrobium unclassified	0	0	0	1e-05	0	0	0	0	0	0	0	2e-05	0	0	0	0	0	1e-05	1e-05	0	1e-05	1e-05	0	1e-05	0	1e-05	0	0	1e-05	0	0	0	0	0	0	0	0	1e-05	0	0	0	0
d__Bacteria	p__Fibrobacteres	c__Fibrobacteria	o__Fibrobacterales	f__Fibrobacteraceae	g__Fibrobacter	s__unclassified	Fibrobacter unclassified	0	0	0	0	0	0	0	0	0	0	0	1e-05	0	0	0	0	0	0	0	0	0	0	0	0	0	0	0	0	0	0	0	0	0	0	0	0	0	0	0	0	0	0
d__Bacteria	p__Firmicutes	c__Negativicutes					X-unclassified	0	0	0	0	0	0	0	0	0	0	0	0	0	0	0	0	0	0	0	0	0	0	0	0	0	0	0	0	0	0	0	0	0	0	0	0	0	0	0	0	0	0
d__Bacteria	p__Firmicutes	c__Bacilli	o__Bacillales				X-unclassified	0	0	0	0	0	0	0	0	3e-05	0	0	0	0	0	0	0	0	0	0	0	0	0	0	0	0	0	0	0	0	0	0	0	0	0	0	0	0	0	0	0	0	2e-05
d__Bacteria	p__Firmicutes	c__Bacilli	o__Bacillales	f__Planococcaceae_92% / Staphylococcaceae_6% / Family_XI_2%			X-unclassified	0	1e-05	0	0	0	0	0	0	0	0	0	0	0	0	0	0	0	0	0	0	0	0	0	0	0	0	0	0	0	0	0	0	0	0	0	0	0	0	0	0	0	0
d__Bacteria	p__Firmicutes	c__Bacilli	o__Bacillales	f__Bacillaceae	g__Bacillus	s__durans	Bacillus durans	0	1e-05	0	0	0	0	0	0	0	0	0	0	0	0	0	0	0	0	0	0	0	0	0	0	0	0	0	0	0	0	0	0	0	0	0	0	0	0	0	0	0	0
d__Bacteria	p__Firmicutes	c__Bacilli	o__Bacillales	f__Family_XI	g__Gemella	s__unclassified	Gemella unclassified	0	0	1e-05	0	0	0	0	0	0	0	0	0	0	0	0	0	0	0	0	0	0	0	0	0	0	0	0	0	0	0	0	0	0	0	0	0	0	0	0	0	0	0
d__Bacteria	p__Firmicutes	c__Bacilli	o__Bacillales	f__Family_XI	g__Gemella	s__sanguinis	Gemella sanguinis	0	0	0	0	0	0	0	0	0	0	0	0	0	0	0	0	0	0	0	0	0	0	0	0	0	0	0	0	0	0	0	0	0	0	0	0	0	0	0	0	4e-05	0
d__Bacteria	p__Firmicutes	c__Bacilli	o__Bacillales	f__Planococcaceae	g__Planomicrobium_71% / unclassified_28%		X-unclassified	0.00013	0	0	0	2e-05	0	0	0	0	0	0	0	0	0	0	0	0	0	0	0	0	0	0	0	0	0	0	0	0	0	0	0	0	0	0	0	0	0	0	0	0	0
d__Bacteria	p__Firmicutes	c__Bacilli	o__Bacillales	f__Planococcaceae	g__Planomicrobium	s__unclassified	Planomicrobium unclassified	0.00178	0.00266	0.00939	0	0	0	0	7e-05	0	0	0	0	0	0	0	0	0	0	0	0	0	0	0	0	0	0	0	0	0	0	0	0	0	1e-05	0	0	0	2e-05	0	0	0	0
d__Bacteria	p__Firmicutes	c__Bacilli	o__Bacillales	f__Staphylococcaceae	g__Staphylococcus	s__unclassified	Staphylococcus unclassified	3e-05	0	0	0	0	0	0	0	0	0	0	0	0	0	0	0	0	0	0	0	0	0	0	0	0	0	0	0	0	0	0	0	0	0	0	0	0	0	0	0	0	0
d__Bacteria	p__Firmicutes	c__Bacilli	o__Lactobacillales	f__16d63.751_37% / Carnobacteriaceae_37% / Lactobacillaceae_25%			X-unclassified	0	0	0	0	0	0	0	0	0	0	0	0	0	0	0	0	0	0	0	0	0	0	0	0	0	0	0	0	0	0	0	0	0	0	0	0	0	0	0	0	0	1e-05
d__Bacteria	p__Firmicutes	c__Bacilli	o__Lactobacillales	f__Carnobacteriaceae	g__Trichococcus	s__collinsii_56% / pasteurii_28% / flocculiformis_14%	Trichococcus unclassified	0	0	1e-05	0	0	0	0	0	0	0	0	0	0	0	0	0	0	0	0	0	0	0	0	0	0	0	0	0	0	0	0	0	0	0	0	0	0	0	0	0	0	0
d__Bacteria	p__Firmicutes	c__Bacilli	o__Lactobacillales	f__Enterococcaceae	g__Enterococcus	s__faecalis_36% / faecium_33% / hirae_15% / durans_3% / casseliflavus_2% / unclassified_2% / mundtii_1% / villorum_1%	Enterococcus unclassified	0.00101	0.00501	0.00665	0.00041	0	0.00051	0	0.00146	0.00036	0	0	0	0	0	0	0	0	6e-05	0	0	0	0	0	0	0	0	0	5e-05	9e-05	0.00012	8e-05	5e-05	0.00147	0.00153	0.00094	0.0012	0.00057	0	0.00014	8e-05	0	0.0007
d__Bacteria	p__Firmicutes	c__Bacilli	o__Lactobacillales	f__Enterococcaceae	g__Enterococcus	s__asini	Enterococcus asini	0	0	2e-05	0	0	0	0	0	0	0	0	0	0	0	0	0	0	0	0	0	0	0	0	0	0	0	0	0	0	0	0	0	0	0	0	0	0	0	0	0	0	0
d__Bacteria	p__Firmicutes	c__Bacilli	o__Lactobacillales	f__Enterococcaceae	g__Enterococcus	s__canis	Enterococcus canis	0	0	0	0	0	0	0	0	0	0	0	0	0	0	0	0	0	0	0	0	0	0	0	0	0	0	0	0	0	0	0	0	0	0	0	0	0	0	0	0	0	0
d__Bacteria	p__Firmicutes	c__Bacilli	o__Lactobacillales	f__Enterococcaceae	g__Enterococcus	s__casseliflavus	Enterococcus casseliflavus	0	0.00011	0	0	0	0	0	0	0	0	0	0	0	0	0	0	0	0	0	0	0	0	0	0	0	0	0	0	0	0	0	0	9e-05	0.00171	0	0.00041	0.00031	0	4e-05	0	0	0
d__Bacteria	p__Firmicutes	c__Bacilli	o__Lactobacillales	f__Enterococcaceae	g__Enterococcus	s__durans	Enterococcus durans	0.00251	0.01867	0.02738	0	0	0	0	0	0	0	0	0	0	0	0	0	0	0	0	0	0	0	0	0	0	0	0	0	0	0	0	0	0	0	0	0	0	0	0	0	0	0
d__Bacteria	p__Firmicutes	c__Bacilli	o__Lactobacillales	f__Enterococcaceae	g__Enterococcus	s__eurekensis	Enterococcus eurekensis	0	0	0	0	0	0	0	0	0	0	0	0	0	0	0	0	0	0	0	0	0	0	0	0	0	0	0	0	0	0	0	0	0	0	0	0	0	0	0	0	0	0
d__Bacteria	p__Firmicutes	c__Bacilli	o__Lactobacillales	f__Enterococcaceae	g__Enterococcus	s__faecalis	Enterococcus faecalis	0	0	0	0	0.00056	0	0	0	0	1e-05	2e-05	0.00017	6e-05	0	0	0	0	0	0	0	0	0	1e-05	0	0	0	0	0	0	0	0	0	0.00039	0.00016	0.00094	1e-05	0	0	0	0	0	0
d__Bacteria	p__Firmicutes	c__Bacilli	o__Lactobacillales	f__Enterococcaceae	g__Enterococcus	s__faecium	Enterococcus faecium	0.0257	0.0929	0.11331	0	0	0	0.00035	0	0.00147	0.00011	0	0.00125	0.00108	0.00088	0	0	0	0	0	0	0	0	0	0	0	0	0	0	0	0	0	0	0	0	0	0	0	0.00046	0	0	0.00041	0
d__Bacteria	p__Firmicutes	c__Bacilli	o__Lactobacillales	f__Enterococcaceae	g__Enterococcus	s__haemoperoxidus	Enterococcus haemoperoxidus	0	0	0.00283	0	0	0	0	0	0	0	0	0	0	0	0	0	0	0	0	0	0	0	0	0	0	0	0	0	0	0	0	0	0	0	0	0	0	0	0	0	0	0
d__Bacteria	p__Firmicutes	c__Bacilli	o__Lactobacillales	f__Enterococcaceae	g__Enterococcus	s__hirae	Enterococcus hirae	0	0	0	0	0	0	0	0	0	0	9e-05	0	0	0	0	0	0	0	0	0	0	0	0	0	0	0	0	0	0	0	0	0	0	0	0	0	0	0	0	0	0	0
d__Bacteria	p__Firmicutes	c__Bacilli	o__Lactobacillales	f__Enterococcaceae	g__Enterococcus	s__lactis	Enterococcus lactis	0	0.22525	0.00029	0	0	0	0	0	0	0	0	0	0	0	0	0	0	0	0	0	0	0	0	0	0	0	0	0	0	0	0	0	0	0	0	0	0	0	0	0	0	0
d__Bacteria	p__Firmicutes	c__Bacilli	o__Lactobacillales	f__Enterococcaceae	g__Enterococcus	s__mesenteroides	Enterococcus mesenteroides	0	0	7e-05	0	0	0	0	0	0	0	0	0	0	0	0	0	0	0	0	0	0	0	0	0	0	0	0	0	0	0	0	0	0	0	0	0	0	0	0	0	0	0
d__Bacteria	p__Firmicutes	c__Bacilli	o__Lactobacillales	f__Enterococcaceae	g__Enterococcus	s__mundtii	Enterococcus mundtii	0.0474	0.00512	0.01202	0	0	0	0	0	0	0	0	0	0	0	0	0	0	0	0	0	0	0	0	0	0	0	0	0	0	0	0	0	0	0	0	0	0	0	0	0	0	0
d__Bacteria	p__Firmicutes	c__Bacilli	o__Lactobacillales	f__Enterococcaceae	g__Enterococcus	s__raffinosus	Enterococcus raffinosus	1e-05	0	0	0	0	0	0	0	0	0	0	0	0	0	0	0	0	0	0	0	0	0	0	0	0	0	0	0	0	0	0	0	0	0	0	0	0	0	0	0	0	0
d__Bacteria	p__Firmicutes	c__Bacilli	o__Lactobacillales	f__Enterococcaceae	g__Enterococcus	s__villorum	Enterococcus villorum	0	0	0.24523	0	0	0	0	0	0	0	0	0	0	0	0	0	0	0	0	0	0	0	0	0	0	0	0	0	0	0	0	0	0	0	0	0	0	0	0	0	0	0
d__Bacteria	p__Firmicutes	c__Bacilli	o__Lactobacillales	f__Lactobacillaceae	g__Lactobacillus	s__unclassified_66% / sakei_17% / casei_7% / paracasei_5% / curvatus_1% / graminis_1%	Lactobacillus unclassified	7e-05	0	4e-05	0	0	0	0	0	0	0	0	0	0	0	0	0	0	0	0	0	0	0	0	0	0	0	0	0	0	0	0	0	0	0	0	0	0	0	0	0	0	1e-05
d__Bacteria	p__Firmicutes	c__Bacilli	o__Lactobacillales	f__Lactobacillaceae	g__Lactobacillus	s__curvatus	Lactobacillus curvatus	0	0	0	0	0	0	0	0	1e-05	0	0	0	0	0	0	0	0	0	0	0	0	0	0	0	0	0	0	0	0	0	0	0	0	0	0	0	0	0	0	0	0	0
d__Bacteria	p__Firmicutes	c__Bacilli	o__Lactobacillales	f__Lactobacillaceae	g__Lactobacillus	s__gasseri	Lactobacillus gasseri	0	2e-05	0	0	0	0	0	0	0	0	0	0	0	0	0	0	0	0	0	0	0	0	0	0	0	0	0	0	0	0	0	0	0	0	0	0	0	0	0	0	5e-05	1e-05
d__Bacteria	p__Firmicutes	c__Bacilli	o__Lactobacillales	f__Lactobacillaceae	g__Lactobacillus	s__mucosae	Lactobacillus mucosae	1e-05	0	0	0	0	0	0	0	0	0	0	0	0	0	0	0	0	0	0	0	0	0	0	0	0	0	0	0	0	0	0	0	0	0	0	0	0	0	0	0	0	1e-05
d__Bacteria	p__Firmicutes	c__Bacilli	o__Lactobacillales	f__Lactobacillaceae	g__Lactobacillus	s__ruminis	Lactobacillus ruminis	9e-05	0.00017	8e-05	0	0	0	0	0	0	0	0	0	0	0	0	0	0	0	0	0	0	0	0	0	0	0	0	0	0	0	0	0	0	0	0	0	0	0	0	0	0.00113	0.00335
d__Bacteria	p__Firmicutes	c__Bacilli	o__Lactobacillales	f__Leuconostocaceae	g__Leuconostoc	s__mesenteroides_64% / pseudomesenteroides_35%	Leuconostoc unclassified	0	0	0	0	0	0	0	0	0	0	0	0	0	0	0	0	0	0	0	0	0	0	0	0	0	0	0	0	0	0	0	0	0	0	0	0	0	0	0	0	0	9e-05
d__Bacteria	p__Firmicutes	c__Bacilli	o__Lactobacillales	f__Leuconostocaceae	g__Leuconostoc	s__citreum	Leuconostoc citreum	0	0	0	0	0	0	0	0	0	0	0	0	0	0	0	0	0	0	0	0	0	0	0	0	0	0	0	0	0	0	0	0	0	0	0	0	0	0	0	0	0	5e-05
d__Bacteria	p__Firmicutes	c__Bacilli	o__Lactobacillales	f__Leuconostocaceae	g__Leuconostoc	s__lactis	Leuconostoc lactis	0	0	0	0	0	0	0	0	0	0	0	0	0	0	0	0	0	0	0	0	0	0	0	0	0	0	0	0	0	0	0	0	0	0	0	0	0	0	0	0	2e-05	0
d__Bacteria	p__Firmicutes	c__Bacilli	o__Lactobacillales	f__Leuconostocaceae	g__Leuconostoc	s__mesenteroides	Leuconostoc mesenteroides	0	0	0	0	0	0	0	0	0	0	0	0	0	0	0	0	0	0	0	0	0	0	0	0	0	0	0	0	0	0	0	0	0	0	0	0	0	0	0	0	0	0
d__Bacteria	p__Firmicutes	c__Bacilli	o__Lactobacillales	f__Rs-D42	g__unclassified		X-unclassified	0	0	0	0	0	0	0	0	0	0	0	0	0	0	0	0	0	0	0	0	0	0	0	0	0	0	0	0	0	0	0	0	0	0	0	0	0	0	0	0	0	0
d__Bacteria	p__Firmicutes	c__Bacilli	o__Lactobacillales	f__Streptococcaceae	g__Lactococcus	s__lactis	Lactococcus lactis	6e-05	4e-05	7e-05	0	0.00016	0	0	0	1e-05	0	0	0	0	0	0	0	0	0	0	0	0	0	0	0	0	0	0	0	0	0	0	0	0	0	0	0	0	0	0	0	0.00036	0.00097
d__Bacteria	p__Firmicutes	c__Bacilli	o__Lactobacillales	f__Streptococcaceae	g__Streptococcus	s__gallolyticus_28% / unclassified_19% / parasanguinis_9% / salivarius_8% / australis_8% / alactolyticus_6% / equinus_6% / oralis_4% / lactarius_2% / infantarius_2% / peroris_1% / lutetiensis_1% / pneumoniae_1%	Streptococcus unclassified	0.00022	4e-05	9e-05	0	0	0	0	0	1e-05	0	0	1e-05	0	0	0	0	0	0	0	0	0	0	0	0	0	0	0	0	0	0	0	0	0	0	0	0	0	0	0	0	0.00028	0.00031
d__Bacteria	p__Firmicutes	c__Bacilli	o__Lactobacillales	f__Streptococcaceae	g__Streptococcus	s__agalactiae	Streptococcus agalactiae	0	0	0	0	0	0	0	0	0	0	0	0	0	0	0	0	0	0	0	0	0	0	0	0	0	0	0	0	0	0	0	0	0	0	0	0	0	0	0	0	2e-05	0
d__Bacteria	p__Firmicutes	c__Bacilli	o__Lactobacillales	f__Streptococcaceae	g__Streptococcus	s__anginosus	Streptococcus anginosus	1e-05	0	0	0	0	0	0	1e-05	0	0	0	0	0	0	0	0	0	0	0	0	0	0	0	0	0	0	0	0	0	0	0	0	0	0	0	0	0	0	0	0	0	0
d__Bacteria	p__Firmicutes	c__Bacilli	o__Lactobacillales	f__Streptococcaceae	g__Streptococcus	s__infantis	Streptococcus infantis	0	0	0	0	0	0	0	0	0	0	0	0	0	0	0	0	0	0	0	0	0	0	0	0	0	0	0	0	0	0	0	0	0	0	0	0	0	0	0	0	0.00017	0
d__Bacteria	p__Firmicutes	c__Bacilli	o__Lactobacillales	f__Streptococcaceae	g__Streptococcus	s__intermedius	Streptococcus intermedius	0	0	0	0	0	0	0	0	0	0	0	0	0	0	0	0	0	0	0	0	0	0	0	0	0	0	0	0	0	0	0	0	0	0	0	0	0	0	0	0	2e-05	0
d__Bacteria	p__Firmicutes	c__Bacilli	o__Lactobacillales	f__Streptococcaceae	g__Streptococcus	s__mitis	Streptococcus mitis	0	0	0	0	0	0	0	0	0	0	0	0	0	0	0	0	0	0	0	0	0	0	0	0	0	0	0	0	0	0	0	0	0	0	0	0	0	0	0	0	0	8e-05
d__Bacteria	p__Firmicutes	c__Bacilli	o__Lactobacillales	f__Streptococcaceae	g__Streptococcus	s__mutans	Streptococcus mutans	0	0	0	0	0	0	0	0	0	0	0	0	0	0	0	0	0	0	0	0	0	0	0	0	0	0	0	0	0	0	0	0	0	0	0	0	0	0	0	0	1e-05	1e-05
d__Bacteria	p__Firmicutes	c__Bacilli	o__Lactobacillales	f__Streptococcaceae	g__Streptococcus	s__parasanguinis	Streptococcus parasanguinis	0	0	0	0	0	0	0	0	0	0	0	0	0	0	0	0	0	0	0	0	0	0	0	0	0	0	0	0	0	0	0	0	0	0	0	0	0	0	0	0	0.00018	0
d__Bacteria	p__Firmicutes	c__Bacilli	o__Lactobacillales	f__Streptococcaceae	g__Streptococcus	s__salivarius	Streptococcus salivarius	0	0	0	0	0	0	0	0	0	0	0	0	0	0	0	0	0	0	1e-05	0	0	0	0	0	0	0	0	0	0	0	0	0	0	0	0	0	0	0	0	0	0.00114	0.00111
d__Bacteria	p__Firmicutes	c__Bacilli	o__Lactobacillales	f__Streptococcaceae	g__Streptococcus	s__sanguinis	Streptococcus sanguinis	0	0	0	0	0.01303	0	0	0	0	0	0	0	0	0	0	0	0	0	0	0	0	0	0	0	0	0	0	0	0	0	0	0	0	0	0	0	0	0	0	9e-05	5e-05	2e-05
d__Bacteria	p__Firmicutes	c__Clostridia	o__Clostridiales	f__Family_XIII_69% / Clostridiaceae_1_20% / Christensenellaceae_7%			X-unclassified	0.00013	0.00025	7e-05	0	0.02189	0.00052	0	0.00958	0.0003	0	0	7e-05	0.0001	0	0	0.00207	0.00349	0	0.00033	0	0.00527	0.01593	0.02323	0.02052	0	0	0.00128	0.00286	9e-05	4e-05	3e-05	0.00076	0	6e-05	0	0	0	0	0	0	0.0002	0.00033
d__Bacteria	p__Firmicutes	c__Clostridia	o__Clostridiales	f__Christensenellaceae	g__Christensenellaceae_R-7_group		X-unclassified	0	0	0	0.00057	8e-05	0.00907	0	0	0	0.00031	0	0	0	0.00042	0.00259	0	0	0	0	0	0	0	0	0	9e-05	0.0001	0.00019	0.00031	0.00017	0.00092	0.0003	0.00037	0	0	0	0	0	0	0	0	0.00029	9e-05
d__Bacteria	p__Firmicutes	c__Clostridia	o__Clostridiales	f__Christensenellaceae	g__Catabacter	s__hongkongensis	Catabacter hongkongensis	0	0	0	3e-05	0.00094	1e-05	0	0	0	4e-05	0	0	0	2e-05	4e-05	0	0	0	0	0	0	0	0	3e-05	0.00012	9e-05	2e-05	3e-05	1e-05	0	0	0	0	0	0	0	0	0	0	0	0	0
d__Bacteria	p__Firmicutes	c__Clostridia	o__Clostridiales	f__Christensenellaceae	g__Christensenella	s__minuta	Christensenella minuta	0	0	0	0	0	0.00072	0	0	0	0	0	0	0	0	0	0	0	0	0	0	0	0	0	0	0.00012	0.0003	0.00039	0.0005	0.0004	0.00036	0.00023	0.00018	0	0	0	0	0	0	0	2e-05	4e-05	1e-05
d__Bacteria	p__Firmicutes	c__Clostridia	o__Clostridiales	f__Christensenellaceae	g__Christensenellaceae_R-7_group	s__unclassified	Christensenellaceae_R-7_group unclassified	0	0	0	0	0.01664	0	0.00093	0.00033	0	0	0	0	0	0	0	0	0	0.00095	0	0.00047	0.00539	0.01136	0.0149	0.01022	0	0	0	0	0	0	0	0	0	0	0	0	0	0	0	0	0.01904	0.01299
d__Bacteria	p__Firmicutes	c__Clostridia	o__Clostridiales	f__Clostridiaceae_1	g__Sarcina		X-unclassified	0.00014	0	0	0.02416	0	0.00022	0	0	0.00015	0.0134	0.00961	0.00561	0.00121	0.00143	0.00185	0	0	0	0	0.00034	0	0	0	0	0.00135	0.00181	0	0	0.0023	0.01072	0.00474	0	0	0	0	0	0.00051	0.00019	7e-05	0	0.0334	0
d__Bacteria	p__Firmicutes	c__Clostridia	o__Clostridiales	f__Clostridiaceae_1	g__Clostridium_sensu_stricto_13	s__unclassified	Clostridium_sensu_stricto_13 unclassified	0	1e-05	5e-05	0	0	0	0	0.00396	0.00386	0	0	0	0	0	0	0	0	0	0	0	0	0	0	0	0	0	0	0	0	0	0	0	0	0	0	0	0	0	0	0	0	0
d__Bacteria	p__Firmicutes	c__Clostridia	o__Clostridiales	f__Clostridiaceae_1	g__Clostridium_sensu_stricto_13	s__subterminale	Clostridium_sensu_stricto_13 subterminale	0	0	0.00012	0	0.00013	6e-05	0	0.04082	0.01426	0	0	0.00017	0.00052	0.0005	4e-05	0	0	0	0	0	0	0	0	0	6e-05	0	0	0	0	4e-05	0	0	0	0	0	0	0	0	0	0	0	0
d__Bacteria	p__Firmicutes	c__Clostridia	o__Clostridiales	f__Clostridiaceae_1	g__Clostridium_sensu_stricto_1	s__unclassified_81% / perfringens_15% / chauvoei_2%	Clostridium_sensu_stricto_1 unclassified	0.00425	0.00895	0.00987	0.00049	0	0.0001	0.00073	0.00208	0.0059	0	0	0	0	0	0	0	0	0.00024	0	0	0	0	0	0	0	0	0	0	0	0	0	0	0.0004	0.00061	0.0003	0.00013	0.00034	0.00055	0.00016	0	4e-05	0.01231
d__Bacteria	p__Firmicutes	c__Clostridia	o__Clostridiales	f__Clostridiaceae_1	g__Clostridium_sensu_stricto_1	s__celatum	Clostridium_sensu_stricto_1 celatum	3e-05	0	0	6e-05	0	0	0	3e-05	4e-05	0	0	0	0	0	0	0	0	0	0	0	0	0	0	0	0	0	0	0	0	1e-05	0	0	0	0	0	0	0	0	0	0	0.00044	0
d__Bacteria	p__Firmicutes	c__Clostridia	o__Clostridiales	f__Clostridiaceae_1	g__Clostridium_sensu_stricto_1	s__chauvoei	Clostridium_sensu_stricto_1 chauvoei	0	0	0	0	0	0	0	0	0	0	0	0	0	0	0	0	0	0	0	0	0	0	0	0	0	0	0	0	0	0	0	0	0	0	0	0	0	0	0	0	0	0
d__Bacteria	p__Firmicutes	c__Clostridia	o__Clostridiales	f__Clostridiaceae_1	g__Clostridium_sensu_stricto_1	s__paraputrificum	Clostridium_sensu_stricto_1 paraputrificum	0	0	0	0	0	0	0.00026	0	0	0	0	0	0	0	0	0	0	0	0	0	0	0	0	0	0	0	0	0	0	0	0	0	5e-05	0	3e-05	5e-05	0.00088	0.00308	0.00218	0.00046	0	0
d__Bacteria	p__Firmicutes	c__Clostridia	o__Clostridiales	f__Clostridiaceae_1	g__Clostridium_sensu_stricto_1	s__quinii	Clostridium_sensu_stricto_1 quinii	0	0	0	0	0	0	0	0	0	0	0	0	0	0	0	0	0	0	0	0	0	0	0	0	0	0	0	0	0	0	0	0	0	0	0	0	0	0	0	0	0	0
d__Bacteria	p__Firmicutes	c__Clostridia	o__Clostridiales	f__Clostridiaceae_1	g__Clostridium_sensu_stricto_1	s__sardiniense	Clostridium_sensu_stricto_1 sardiniense	0	0	1e-05	0	0	0	0	0	0	0	0	0	0	0	0	0	0	0	0	0	0	0	0	0	0	0	0	0	0	0	0	0	0	0	0	0	0	0	0	0	0	0
d__Bacteria	p__Firmicutes	c__Clostridia	o__Clostridiales	f__Clostridiaceae_1	g__Clostridium_sensu_stricto_1	s__sartagoforme	Clostridium_sensu_stricto_1 sartagoforme	0	0	0	0	0.00116	3e-05	0	0	4e-05	0	0	0	0	0	0	0	0	0	0	0	0	0	0	0	0	0	0	0	0	0	0	0	0	0	0	0	0	0	0	0	0	0
d__Bacteria	p__Firmicutes	c__Clostridia	o__Clostridiales	f__Clostridiaceae_1	g__Clostridium_sensu_stricto_1	s__tertium	Clostridium_sensu_stricto_1 tertium	0.00111	0.02475	0.16352	0.00102	0	0.00025	0.00584	0.00314	0.00288	0.00033	0.00021	0.00058	0.00056	0.00017	0	0	0	0.00094	0	0	0	0	0	0	0	0	0	0	0	0	0	0	0.00507	0.00509	0.00045	0.00024	0.00182	0.00395	0.00221	0.00017	0	0
d__Bacteria	p__Firmicutes	c__Clostridia	o__Clostridiales	f__Clostridiaceae_1	g__Sarcina	s__unclassified	Sarcina unclassified	0	0	0	0	0	0	0	0	0	0	0	0	0	0	0	0	0	0	0	0	0	0	0	0	0	0	0	0	0	0	0	0	0	0	0	0	0	0	0	0	0	0.00412
d__Bacteria	p__Firmicutes	c__Clostridia	o__Clostridiales	f__Clostridiaceae_1	g__Sarcina	s__tarantellae	Sarcina tarantellae	0	0	0	0	1e-05	0	0	0	0	0	0	0	0	0	0	0	0	0	0	0	0	0	0	0	0	0	0	0	0	0	0	0	0	0	0	0	0	0	0	0	0	0
d__Bacteria	p__Firmicutes	c__Clostridia	o__Clostridiales	f__Clostridiales_vadinBB60_group	g__unclassified		X-unclassified	0	0	1e-05	0	0	0	0	0	0	0	0	0	0	4e-05	1e-05	0	0	0	0	2e-05	0	0	0	0	0	0	0	0	0	0	0	0	0	0	0	0	0	0	0	0	0.00043	0.00013
d__Bacteria	p__Firmicutes	c__Clostridia	o__Clostridiales	f__Defluviitaleaceae	g__Defluviitaleaceae_UCG-011		X-unclassified	0	0	0	0	0	0	0	0	0	0	0	0	0	0	0	0	0	0	0	0	0	0	0	0	0	0	0	0	0	0	0	0	0	0	0	0	0	0	0	0	0	0
d__Bacteria	p__Firmicutes	c__Clostridia	o__Clostridiales	f__Defluviitaleaceae	g__Defluviitaleaceae_UCG-011	s__unclassified	Defluviitaleaceae_UCG-011 unclassified	0	0	0	0	0	0	0	0	0	0	0	0	0	0	0	0	0	0	0	0	0	0	0	0	0	0	0	0	0	0	0	0	0	0	0	0	0	0	0	0	0	0.0001
d__Bacteria	p__Firmicutes	c__Clostridia	o__Clostridiales	f__Eubacteriaceae	g__Anaerofustis	s__unclassified	Anaerofustis unclassified	0	0	0	0	0	0	0	0	0	0	0	0	0	0	0	0	0	0	0	0	0	0	0	0	0	0	0	0	0	0	0	0	0	0	0	0	0	0	0	0	0	1e-05
d__Bacteria	p__Firmicutes	c__Clostridia	o__Clostridiales	f__Eubacteriaceae	g__Anaerofustis	s__stercorihominis	Anaerofustis stercorihominis	0	0	0	0	0	0	0	0	0	0	0	0	0	0	0	0	0	0	0	0	0	0	0	0	0	0	0	0	0	0	0	0	0	0	0	0	0	0	0	0	0	0
d__Bacteria	p__Firmicutes	c__Clostridia	o__Clostridiales	f__Family_XI	g__Anaerococcus	s__unclassified	Anaerococcus unclassified	0	0	0	0	0	1e-05	0	3e-05	0	3e-05	0	0	0	0	0	0	0	0	0	0	0	0	0	0	0	0	0	0	0	0	0	0	0	0	0	0	0	0	0	0	0	0
d__Bacteria	p__Firmicutes	c__Clostridia	o__Clostridiales	f__Family_XI	g__Anaerococcus	s__obesiensis	Anaerococcus obesiensis	0	0	0	0	0	0	0	0	0	0	0	0	0	0	0	0	0	0	0	0	0	0	0	0	0	0	0	0	0	0	0	0	0	0	0	0	0	0	0	0	0	0
d__Bacteria	p__Firmicutes	c__Clostridia	o__Clostridiales	f__Family_XI	g__Anaerococcus	s__prevotii	Anaerococcus prevotii	0	0	0	0	0	0	0	0	0	0	0	0	0	0	0	0	0	0	0	0	0	0	0	0	0	0	0	0	0	0	0	0	0	0	0	0	0	0	0	0	0	0
d__Bacteria	p__Firmicutes	c__Clostridia	o__Clostridiales	f__Family_XI	g__Anaerococcus	s__vaginalis	Anaerococcus vaginalis	0	0	0	0	0	0.00015	0	0	0	0	0	0	0	0	0	0	0	0	0	0	0	0	0	0	0	0	0	0	0	0	0	0	3e-05	0	0	0	0	0	1e-05	0	0	0
d__Bacteria	p__Firmicutes	c__Clostridia	o__Clostridiales	f__Family_XI	g__Ezakiella	s__unclassified	Ezakiella unclassified	0	0	0	0	0	0	0	0	0	0	0	0	0	0	0	0	0	0	0	0	0	0	0	0	0	0	0	0	0	0	0	0	0	0	0	0	0	0	0	0	4e-05	0
d__Bacteria	p__Firmicutes	c__Clostridia	o__Clostridiales	f__Family_XI	g__Ezakiella	s__magna	Ezakiella magna	0	0	0	0	0	0	0	0	0	0	0	0	0	0	0	0	0	0	0	0	0	0	0	0	0	0	0	0	0	0	0	0	0	0	0	0	0	0	0	0	1e-05	0
d__Bacteria	p__Firmicutes	c__Clostridia	o__Clostridiales	f__Family_XI	g__Finegoldia	s__magna	Finegoldia magna	1e-05	0	2e-05	0	0	0	0	0	3e-05	0	0	0	0	0	0	0	0	0	0	0	0	0	0	0	0	1e-05	0	0	0	0	0	0	0	0	0	0	0	1e-05	0	0	0	0
d__Bacteria	p__Firmicutes	c__Clostridia	o__Clostridiales	f__Family_XI	g__Parvimonas	s__micra	Parvimonas micra	0	0	0	0	0	0	0	0	0	0	0	0	0	0	0	0	0	0	0	0	0	0	0	0	0	0	0	0	0	0	0	0	0	0	0	0	0	0	0	0	1e-05	1e-05
d__Bacteria	p__Firmicutes	c__Clostridia	o__Clostridiales	f__Family_XI	g__Peptoniphilus	s__timonensis_42% / harei_40% / unclassified_12% / senegalensis_4%	Peptoniphilus unclassified	0	0	0	0.0457	0.00029	0	0.00058	0	0	0.05411	0.0007	0.0008	0.00102	0.00028	0.00014	0	0	0.00021	0.00359	0.00035	0.00043	0.00013	0.00019	0.00021	0	0.0013	0.00128	0.0004	0.00011	0.00034	0	0.00372	0	0	0	0.00767	0.00307	0.00104	0	0.00043	0	0
d__Bacteria	p__Firmicutes	c__Clostridia	o__Clostridiales	f__Family_XI	g__Peptoniphilus	s__harei	Peptoniphilus harei	0	0	0	0	5e-05	0.00102	0	3e-05	3e-05	0	0	0	0	0	0	0	0	0	0	0	0	0	0	0	0	0	0	0	0	0	0	0	0	0	0.00278	0.00171	0.00081	0.00074	0.00105	0.00012	0	0
d__Bacteria	p__Firmicutes	c__Clostridia	o__Clostridiales	f__Family_XI	g__Peptoniphilus	s__obesi	Peptoniphilus obesi	0	1e-05	0	0	0	0	0	0	0	0	0	0	0	0	0	0	0	0	0	0	0	0	0	0	0	0	0	0	0	0	0	0	0	0	0	0	0	0	0	0	0	0
d__Bacteria	p__Firmicutes	c__Clostridia	o__Clostridiales	f__Family_XI	g__Peptoniphilus	s__timonensis	Peptoniphilus timonensis	0	0	0	0	0	0	0.00125	0	0	0	0.0393	0.06044	0.04867	0.02043	0.00707	0.00185	0.0009	0.03686	0.05127	0.0359	0.03199	0.02731	0.02399	0.01209	0.00765	0.00548	0.00777	0.00425	0.0049	0.00559	0.00223	0	0	0	0	0	0	0	0	0	0	0
d__Bacteria	p__Firmicutes	c__Clostridia	o__Clostridiales	f__Family_XIII	g__[Eubacterium]_nodatum_group_51% / Family_XIII_AD3011_group_31% / unclassified_13% / Family_XIII_UCG-001_3%		X-unclassified	0	0	0	0.00069	0.00144	0	0	0	0	0.00065	0.00048	0.0001	0.0001	0.00064	0	0	0	0	0	0	0	0	0	0	0.00087	0.00096	0.00052	0.00191	0.00066	0.00031	0.00013	0.00016	0	0	0	0	0	0	0	0	0.00094	0
d__Bacteria	p__Firmicutes	c__Clostridia	o__Clostridiales	f__Family_XIII	g__Family_XIII_AD3011_group	s__unclassified	Family_XIII_AD3011_group unclassified	6e-05	8e-05	1e-05	0.0003	0.00018	0	0	0	0	0	0.00017	0	0	0	0	0	0	0	0	0	0	0	0	0	0.00238	0.00215	0.00226	0	0	0	0	0	0	0	0	0	0	0	0	0	0	0.00042
d__Bacteria	p__Firmicutes	c__Clostridia	o__Clostridiales	f__Family_XIII	g__Family_XIII_UCG-001	s__unclassified	Family_XIII_UCG-001 unclassified	0	0	0	0.00044	0	0	0	0	0	0.0009	0.00042	0.00096	0.0015	0.00128	0.00163	0.00022	0.00135	0	0	0	0	0	0	0	0.00079	0.00079	0.00033	0.00054	0.00059	0.00177	0.00134	0.00031	0	0	0	0	0	0	0	0	0.00071	0
d__Bacteria	p__Firmicutes	c__Clostridia	o__Clostridiales	f__Family_XIII	g__Family_XIII_UCG-002	s__unclassified	Family_XIII_UCG-002 unclassified	0	0	0	0	0	0	0	0	0	0	0	0	0	0	0	0	0	0	0	0	0	0	0	0	0	0	0	0	0	0	0	0	0	0	0	0	0	0	0	0	0	0
d__Bacteria	p__Firmicutes	c__Clostridia	o__Clostridiales	f__Family_XIII	g__Mogibacterium	s__unclassified	Mogibacterium unclassified	0	0	4e-05	0.00015	0	0.00731	2e-05	0	0.00053	7e-05	5e-05	0.00159	0.00127	0.00172	4e-05	0	3e-05	0	0	0.0001	0	0	2e-05	5e-05	7e-05	0	4e-05	0	5e-05	0.00033	7e-05	0.00015	3e-05	0.00014	0.0001	0.00011	6e-05	2e-05	5e-05	3e-05	6e-05	0.00093
d__Bacteria	p__Firmicutes	c__Clostridia	o__Clostridiales	f__Family_XIII	g__Mogibacterium	s__pumilum	Mogibacterium pumilum	0	0	0	0	0.00014	0	0	0	0	0	0	0	0	0	0	0	0	0	0	0	0	0	0	0	0	0	0	0	0	0	0	0	0	0	0	0	0	0	0	0	0	0
d__Bacteria	p__Firmicutes	c__Clostridia	o__Clostridiales	f__Family_XIII	g__[Eubacterium]_brachy_group	s__unclassified	[Eubacterium]_brachy_group unclassified	0	0	0	0	0	0	0	0	0	0	0	0	1e-05	0	0	0	0	0	0	0	0	0	0	0	0	0	0	0	0	0	0	0	0	0	0	0	0	0	0	0	5e-05	0
d__Bacteria	p__Firmicutes	c__Clostridia	o__Clostridiales	f__Family_XIII	g__[Eubacterium]_brachy_group	s__brachy	[Eubacterium]_brachy_group brachy	0	0	0	0	0	0	0	0	0	0	0	0	0	0	0	0	0	0	0	0	0	0	0	0	0	0	0	0	0	0	0	0	0	0	0	0	0	0	0	0	1e-05	0
d__Bacteria	p__Firmicutes	c__Clostridia	o__Clostridiales	f__Family_XIII	g__[Eubacterium]_nodatum_group	s__unclassified	[Eubacterium]_nodatum_group unclassified	0	0	0	0	0	0	2e-05	0	0	0	0	0.00208	0.00137	0	0.00019	0	5e-05	0	0	0	0	0	2e-05	1e-05	0	0	0	0	0.00047	0.00138	0.00026	3e-05	0	0	0	0	1e-05	2e-05	1e-05	0	0.00152	0
d__Bacteria	p__Firmicutes	c__Clostridia	o__Clostridiales	f__Family_XIII	g__[Eubacterium]_nodatum_group	s__sulci	[Eubacterium]_nodatum_group sulci	0	0	0	0	0.00675	0	0	0	0	0	0	0	0	0	0	0	0	0	0	0	0	0	0	0	0	0	0	0	0	0	0	0	0	0	0	0	0	0	0	0	0	0
d__Bacteria	p__Firmicutes	c__Clostridia	o__Clostridiales	f__Lachnospiraceae	g__unclassified_69% / [Eubacterium]_oxidoreducens_group_20% / Hungatella_2% / Lachnospiraceae_NC2004_group_1% / Lachnospiraceae_NK4A136_group_1% / Lachnospiraceae_UCG-008_1% / Pseudobutyrivibrio_1%		X-unclassified	0.00067	0.00072	0.00141	0.06045	0	0.01103	0.12588	0.2469	0.23897	0.03953	0.04065	0.03885	0.03956	0.07098	0.21342	0.43297	0.31985	0.09879	0.0514	0.02293	0.00789	0.00677	0.0017	0.02289	0.0732	0.00497	0.06871	0.11284	0.10977	0.16979	0.0339	0.18462	0.00223	0.00312	0.0055	0.01562	0.0489	0.0503	0.06197	0.10101	0.05682	0.08705
d__Bacteria	p__Firmicutes	c__Clostridia	o__Clostridiales	f__Lachnospiraceae	g__Acetitomaculum	s__unclassified	Acetitomaculum unclassified	0	0	0	0	0	0	0	0	0	0	0	0	0	0	0	0	0	0	0	0	0	0	0	0	0	0	0	0	0	0	0	0	0	0	0	0	0	0	0	0	2e-05	0
d__Bacteria	p__Firmicutes	c__Clostridia	o__Clostridiales	f__Lachnospiraceae	g__Acetivibrio	s__ethanolgignens	Acetivibrio ethanolgignens	0	0	0	0	0	0	0	0	0	0	0	0	0	0	0	0	0	0	0	0	0	0	0	0	0	0	0	0	0	0	0	0	0	0	0	0	0	0	0	0	0	0
d__Bacteria	p__Firmicutes	c__Clostridia	o__Clostridiales	f__Lachnospiraceae	g__Anaerosporobacter	s__unclassified	Anaerosporobacter unclassified	0	0	0	0	0	0	0	0	0	0	0	0	0	0	0	0	0	0	0	0	0	0	0	0	0	0	0	0	0	0	0	0	0	0	0	0	0	0	0	0	0	0
d__Bacteria	p__Firmicutes	c__Clostridia	o__Clostridiales	f__Lachnospiraceae	g__Anaerostipes	s__unclassified	Anaerostipes unclassified	1e-05	0.00011	4e-05	0	0	0	0	0	0	0	0	0	0	0	0	0	0	0	0	0	0	0	0	0	0	0	0	0	0	0	0	0	0	0	0	0	0	0	0	0	8e-05	0.00736
d__Bacteria	p__Firmicutes	c__Clostridia	o__Clostridiales	f__Lachnospiraceae	g__Anaerostipes	s__hadrus	Anaerostipes hadrus	0.00012	5e-05	5e-05	0	0.00393	0	0	0	0	0	0	0	0	0	0	0	0	0	0	0	0	0	0	0	0	0	0	0	0	0	0	0	0	0	0	0	0	0	0	0	0.00366	0.01994
d__Bacteria	p__Firmicutes	c__Clostridia	o__Clostridiales	f__Lachnospiraceae	g__Blautia	s__unclassified	Blautia unclassified	0.00079	0.00077	0.00053	0.00044	0.00085	0.0065	0.002	0.01285	0.01492	0.00018	0.00029	0.00076	0.00064	0.0008	0	0	0.00122	0.00607	0.00174	0.0002	0.00016	0	0.0001	0.00043	0.00039	0.00123	0.00059	0.00034	0.00052	0.00088	0.00056	0.00097	0.00011	0	0	0	0.00091	0	0	0	0.01077	0.0524
d__Bacteria	p__Firmicutes	c__Clostridia	o__Clostridiales	f__Lachnospiraceae	g__Blautia	s__faecis	Blautia faecis	9e-05	0.00012	7e-05	5e-05	0	0.00053	9e-05	6e-05	7e-05	7e-05	0.0001	0.00034	0.00028	0.00035	0	0	1e-05	0.00037	0.00044	7e-05	6e-05	0.00011	0.00014	3e-05	0.00023	0.0003	0.00037	0.00038	0.00017	0.00019	0.00017	7e-05	0	0	0	0	3e-05	0	0	0	0.00301	0.00501
d__Bacteria	p__Firmicutes	c__Clostridia	o__Clostridiales	f__Lachnospiraceae	g__Blautia	s__luti	Blautia luti	4e-05	0	8e-05	0	0	0	0	0	0	0	0	0	0	0	0	0	0	1e-05	0	1e-05	0	0	0	0	0	0	0	0	0	0	0	0	0	0	0	0	0	0	0	0	0	0.00173
d__Bacteria	p__Firmicutes	c__Clostridia	o__Clostridiales	f__Lachnospiraceae	g__Blautia	s__stercoris	Blautia stercoris	0	0	0	0	2e-05	0	0	0	0	0	0	0	0	0	0	0	0	0	0	0	0	0	0	0	0	0	0	0	0	0	0	0	0	0	0	0	0	0	0	0	2e-05	0.0004
d__Bacteria	p__Firmicutes	c__Clostridia	o__Clostridiales	f__Lachnospiraceae	g__Blautia	s__wexlerae	Blautia wexlerae	9e-05	8e-05	0	0	0	0	0	0	0	0	0	0	2e-05	0	0	0	0	0	0	0	0	0	0	0	0	0	0	0	0	0	0	0	0	0	0	0	0	0	0	0	0.00227	0.01999
d__Bacteria	p__Firmicutes	c__Clostridia	o__Clostridiales	f__Lachnospiraceae	g__Butyrivibrio	s__unclassified	Butyrivibrio unclassified	0	0	0	0	0	0	0	0	0	0	0	0	0	0	0	0	0	0	0	0	0	0	0	0	0	0	0	0	0	0	0	0	0	0	0	0	0	0	0	0	9e-05	0.00013
d__Bacteria	p__Firmicutes	c__Clostridia	o__Clostridiales	f__Lachnospiraceae	g__Butyrivibrio	s__crossotus	Butyrivibrio crossotus	0	0	0	0	0.00039	0	0	0	0	0	0	0	0	0	0	0	0	0	0	0	0	0	0	0	0	0	0	0	0	0	0	0	0	0	0	0	0	0	0	0	0.00041	0.00066
d__Bacteria	p__Firmicutes	c__Clostridia	o__Clostridiales	f__Lachnospiraceae	g__Coprococcus_1	s__unclassified	Coprococcus_1 unclassified	0	0	1e-05	5e-05	0.00014	0.00102	0	0	0	0.00033	0.00021	0	0	0	4e-05	0	0.0001	0	0	0	0	0	0	0	3e-05	8e-05	0	1e-05	8e-05	0.00024	0.00015	0.0002	0	0	0	0	0	0	0	0	9e-05	0.0004
d__Bacteria	p__Firmicutes	c__Clostridia	o__Clostridiales	f__Lachnospiraceae	g__Coprococcus_1	s__catus	Coprococcus_1 catus	7e-05	0.00019	5e-05	0	0	0.00023	0	0	0	0	0	1e-05	0	0	0	0	0	0	0	0	0	0	0	0	0.00033	0.0003	0.00036	0.00087	0.00045	0.00343	0.00114	5e-05	0	0	0	0	0	0	0	1e-05	0.00189	0.00573
d__Bacteria	p__Firmicutes	c__Clostridia	o__Clostridiales	f__Lachnospiraceae	g__Coprococcus_2	s__unclassified	Coprococcus_2 unclassified	0	0	0	0	0	0	0	0	1e-05	0	3e-05	0	1e-05	0	0	0	0	0	0	0	0	5e-05	0.00013	0	0	0	0	0	0	0	0	0	0	0	0	0	0	0	0	0	0.00052	0.00107
d__Bacteria	p__Firmicutes	c__Clostridia	o__Clostridiales	f__Lachnospiraceae	g__Coprococcus_2	s__eutactus	Coprococcus_2 eutactus	2e-05	0	0	0	2e-05	0	0	0	3e-05	0	0	0	0	0	0	0	0	0	0	0	0	0	0	0	0	0	0	0	0	0	0	0	0	0	0	0	0	0	0	0	0.003	0.01056
d__Bacteria	p__Firmicutes	c__Clostridia	o__Clostridiales	f__Lachnospiraceae	g__Coprococcus_3	s__unclassified	Coprococcus_3 unclassified	0	0	0	0	0.00977	5e-05	0.0001	0.00032	0.00083	0	3e-05	0.0001	4e-05	0	1e-05	7e-05	5e-05	8e-05	0	0	0	3e-05	0	0	1e-05	0	6e-05	7e-05	9e-05	0.00056	0.00046	2e-05	1e-05	0	0	0	0	0	1e-05	1e-05	1e-05	0.00021
d__Bacteria	p__Firmicutes	c__Clostridia	o__Clostridiales	f__Lachnospiraceae	g__Coprococcus_3	s__comes	Coprococcus_3 comes	0.00022	0.0002	0.00017	0.01395	0.00049	0.00256	0.03221	0.00758	0.01627	0.00882	0.0094	0.04714	0.04608	0.03495	0.0041	0.00081	0.00105	0.00359	0.00458	0.00113	0.00114	0.00142	0.00261	0.00268	0.01851	0.01747	0.01891	0.02748	0.03087	0.07786	0.02036	0.01495	0.10554	0.05062	0.01506	0.0093	0.00693	0.00533	0.00913	0.00822	0.00682	0.0085
d__Bacteria	p__Firmicutes	c__Clostridia	o__Clostridiales	f__Lachnospiraceae	g__Dorea	s__unclassified	Dorea unclassified	1e-05	1e-05	0	0.00011	0.00028	6e-05	2e-05	0.00012	0.00076	4e-05	7e-05	2e-05	0.0002	8e-05	1e-05	0	0.0008	2e-05	0.00022	0	4e-05	3e-05	0	0	3e-05	2e-05	0	3e-05	3e-05	9e-05	2e-05	2e-05	0	0	0	0	0	0	0	0	0.00068	0.00498
d__Bacteria	p__Firmicutes	c__Clostridia	o__Clostridiales	f__Lachnospiraceae	g__Dorea	s__formicigenerans	Dorea formicigenerans	0.00013	0.00012	1e-05	0.00044	0.00072	0.00031	0.0028	0.00058	0.00099	0.00114	0.00187	0.00421	0.00405	0.00894	0.00448	0.00192	0.00183	0.0061	0.00681	0.00379	0.00328	0.00275	0.00173	0.00096	0.00036	0.00047	0.00014	0.00031	0.00018	0.0006	6e-05	3e-05	0	0	0	0	0	0	0	0	0.00235	0.00637
d__Bacteria	p__Firmicutes	c__Clostridia	o__Clostridiales	f__Lachnospiraceae	g__Dorea	s__longicatena	Dorea longicatena	0.00023	0.00025	0.00011	0.00031	0	0.00384	0	0.00847	0.01509	0.00055	0.00133	0.00129	0.00169	0.00409	0.0006	0.00037	0.00028	0	0	0	0	0	0	2e-05	0.00104	0.00072	0.00031	0.00029	0.0008	0.00045	0.00065	0.00016	0	0	0	0	0	0	0	0	0.01097	0.02455
d__Bacteria	p__Firmicutes	c__Clostridia	o__Clostridiales	f__Lachnospiraceae	g__Eisenbergiella	s__unclassified	Eisenbergiella unclassified	0	0	0	0	0	0	0	0	1e-05	0	0	0	0	0	0	0	0	0	0	0	0	0	0	0	0	3e-05	8e-05	0	0.00012	0.00031	0.00377	0.00832	0	0	0	0	0	0	0	0	0	0.00014
d__Bacteria	p__Firmicutes	c__Clostridia	o__Clostridiales	f__Lachnospiraceae	g__Eisenbergiella	s__tayi	Eisenbergiella tayi	0	0	0	0.00733	0	0.00568	0.00524	0.00208	0.00109	0.00768	0.00696	0.00671	0.00523	0.00595	0.00553	0.02264	0.01883	0.02037	0.05384	0.03661	0.01458	0.00832	0.00811	0.00594	0.0076	0.00599	0.00734	0.02037	0.01357	0.01434	0.02881	0.00932	0	0	0	0	0	0	0	0	0	0
d__Bacteria	p__Firmicutes	c__Clostridia	o__Clostridiales	f__Lachnospiraceae	g__Eubacterium	s__rectale	Eubacterium rectale	0	0	0	0	0	0	0	0	0	0	0	0	0	0	0	0	0	0	0	0	0	0	0	0	0	0	0	0	0	0	0	0	0	0	0	0	0	0	0	0	0	0
d__Bacteria	p__Firmicutes	c__Clostridia	o__Clostridiales	f__Lachnospiraceae	g__Eubacterium	s__ramulus	Eubacterium ramulus	1e-05	1e-05	4e-05	0	0	0	0	0	1e-05	0	0	0	0	0	0	0	0	2e-05	0.00042	0.0007	0.00042	0.00027	0.00012	6e-05	0	0	0	0	0	0	0	0	0	0	0	0	0	0	0	0	0.00088	0.00421
d__Bacteria	p__Firmicutes	c__Clostridia	o__Clostridiales	f__Lachnospiraceae	g__Eubacterium	s__rectale	Eubacterium rectale	7e-05	5e-05	4e-05	0	0	0	0	0	7e-05	4e-05	0	0	0	0	0	0	0	0	0	0	0	0	0	0	0	0	0	0	0	0	0	0	5e-05	0.00108	0.00137	0.00044	7e-05	0	5e-05	0	0.03614	0.02231
d__Bacteria	p__Firmicutes	c__Clostridia	o__Clostridiales	f__Lachnospiraceae	g__Fusicatenibacter	s__unclassified	Fusicatenibacter unclassified	1e-05	1e-05	0.00014	0	0	0.00018	0	0.00391	0.00011	0	0	0	0	0	0	0	0	0	0	0	0	0	0	0	0	0	0	0	0	0	0	0	0	0	0	0	0	0	0	0	0.00028	0.01025
d__Bacteria	p__Firmicutes	c__Clostridia	o__Clostridiales	f__Lachnospiraceae	g__Fusicatenibacter	s__saccharivorans	Fusicatenibacter saccharivorans	0.00034	0.00061	0.00038	0	0	6e-05	0	0.00012	0.00012	0	0	1e-05	0	0	0	0	0	0	0	0	0	0	0	0	0	0	0	0	0	0	0	0	0	0	0	0	0	0	0	0	0.00487	0.01328
d__Bacteria	p__Firmicutes	c__Clostridia	o__Clostridiales	f__Lachnospiraceae	g__Howardella	s__unclassified	Howardella unclassified	0	0	0	0	0	0	0	0	0	0	0	0	0	0	0	0	0	0	0	0	0	0	0	0	0	0	0	0	0	0	0	0	0	0	0	0	0	0	0	0	1e-05	0
d__Bacteria	p__Firmicutes	c__Clostridia	o__Clostridiales	f__Lachnospiraceae	g__Howardella	s__ureilytica	Howardella ureilytica	0	0	0	0	0	0	0	0	0	0	0	0	0	0	0	0	0	0	0	0	0	0	0	0	0	0	0	0	0	0	0	0	0	0	0	0	0	0	0	0	0.00035	0.00016
d__Bacteria	p__Firmicutes	c__Clostridia	o__Clostridiales	f__Lachnospiraceae	g__Hungatella	s__unclassified	Hungatella unclassified	0	0	8e-05	0	0.00089	0.00936	0	0.00353	0	0	0	0	0	0	0	7e-05	0	0	0	0	0	0	0	0	0	0.01784	0.01402	0.02278	0.03381	0	0	0	0	0	0	0	0	0	0	0	0	0
d__Bacteria	p__Firmicutes	c__Clostridia	o__Clostridiales	f__Lachnospiraceae	g__Lachnoclostridium	s__unclassified	Lachnoclostridium unclassified	0.00032	0.00023	0.00022	0.00089	0	0.01868	0.00021	0.00242	0.00678	0.00083	0.00036	0.00089	0.00101	0.00144	0.00279	0.01236	0.0093	0.00107	0.00214	0.0002	0.00016	0.00023	0.00027	0.00091	0.00947	0	0.01224	0.01418	0.0318	0.0267	0.02431	0.07168	0.00014	0.00408	0.01111	0.00827	0.00112	0.00169	0.00073	0.00064	0.00479	0.02542
d__Bacteria	p__Firmicutes	c__Clostridia	o__Clostridiales	f__Lachnospiraceae	g__Lachnoclostridium	s__faecis	Lachnoclostridium faecis	0.00014	0.00013	7e-05	0	0	0	0.00128	0.00138	0.01112	0	0	0	0	0	1e-05	0	0	5e-05	3e-05	0	0	0	0	0	0	0	0	0	0	0	0	0	0.00314	0.00341	0.00134	0.00076	0.0002	0.00019	3e-05	4e-05	0.00433	0.00761
d__Bacteria	p__Firmicutes	c__Clostridia	o__Clostridiales	f__Lachnospiraceae	g__Lachnoclostridium	s__fusiformis	Lachnoclostridium fusiformis	0	0	0	0	0	0	0	0	0	0	0	0	0	0	0	0	0	0	0	0	0	0	0	0	0	0	0	0	0	0	0	0	0	0	0	0	0	0	0	0	0	0
d__Bacteria	p__Firmicutes	c__Clostridia	o__Clostridiales	f__Lachnospiraceae	g__Lachnoclostridium	s__gnavus	Lachnoclostridium gnavus	0	0	0	0	0	0	1e-05	0.00108	0.00167	0	0	0	0	0	0	0	0	0	0	0	0	0	0	0	0	0	0	0	0	0	0	0	0	0	0	0	0	0	0	0	0	1e-05
d__Bacteria	p__Firmicutes	c__Clostridia	o__Clostridiales	f__Lachnospiraceae	g__Lachnoclostridium	s__lactaris	Lachnoclostridium lactaris	0.00011	0.00012	0.00025	0	0	0	0.00021	0.00108	0.00202	0	0	0	0	0	0	0	0	0.02114	0.02594	0.00524	0.00238	0.00145	0.00031	0.00031	0	0	0	0	0	0	0	0	0.00218	0.01469	0.02058	0.02116	0.02094	0.01382	0.01239	0.00738	0.01044	0.00719
d__Bacteria	p__Firmicutes	c__Clostridia	o__Clostridiales	f__Lachnospiraceae	g__Lachnoclostridium	s__torques	Lachnoclostridium torques	0	0	0	0.00073	0	0	0	0	0	0	0	0	0.00045	0.00073	0.00331	0.11494	0.0263	0	0	0	0	0	0	0	0	0	0	0	0	0.02866	0.31933	0.08539	0	0	0	0	0	0	0	0	0.00183	0.00316
d__Bacteria	p__Firmicutes	c__Clostridia	o__Clostridiales	f__Lachnospiraceae	g__Lachnoclostridium_5	s__sulfidigenes	Lachnoclostridium_5 sulfidigenes	0	0	0	0	0	0	0	0	0	0	0	0	0	0	0	0	0	0	0	0	0	0	0	0	0	0	0	0	0	0	0	0	0	0	0	0	0	0	0	0	0	1e-05
d__Bacteria	p__Firmicutes	c__Clostridia	o__Clostridiales	f__Lachnospiraceae	g__Lachnoclostridium_5	s__xylanolyticus	Lachnoclostridium_5 xylanolyticus	0	0	0	0	0.00118	0	0	0	0	0	0	0	0	0	0	0	0	0	0	0	0	0	0	0	0	0	0	0	0	0	0	0	0	0	0	0	0	0	0	0	0	0
d__Bacteria	p__Firmicutes	c__Clostridia	o__Clostridiales	f__Lachnospiraceae	g__Lachnospira	s__unclassified	Lachnospira unclassified	0	0.0001	0	0	0	0	0.0002	0.01667	0.02655	0	0	0	0	0	0	0.00377	0	0	0	0	0	0	0	0	0	0	0	0	0	0	0	0	0	0	0	0	0	0	0	0	0.0013	0.00309
d__Bacteria	p__Firmicutes	c__Clostridia	o__Clostridiales	f__Lachnospiraceae	g__Lachnospira	s__pectinoschiza	Lachnospira pectinoschiza	0	0	0	0.00244	0	0	0.001	0.00071	0.00023	0.00165	0.00018	5e-05	5e-05	0	0	0	0	0	5e-05	0	0	0	0	0	0	0	0	0	0	0	0	0	0	0	0	0	0	0	0	0	0.00041	5e-05
d__Bacteria	p__Firmicutes	c__Clostridia	o__Clostridiales	f__Lachnospiraceae	g__Lachnospiraceae_AC2044_group	s__unclassified	Lachnospiraceae_AC2044_group unclassified	0	0	0	0	0.0002	0	0	0	0	0	0	0	0	0	0	0	0	0	0	0	0	0	0	0	0	0	0	0	0	0	0	0	0	0	0	0	0	0	0	0	0	0
d__Bacteria	p__Firmicutes	c__Clostridia	o__Clostridiales	f__Lachnospiraceae	g__Lachnospiraceae_FCS020_group	s__unclassified	Lachnospiraceae_FCS020_group unclassified	0	3e-05	2e-05	0	0	0.0009	0	6e-05	6e-05	0	0	0	2e-05	0	0	0	0	0	0	0	0	0	1e-05	0	0.00064	0.00064	0.00173	0.00551	0.00312	0.00373	0.00108	0.00068	0	0	0	0	0	0	0	0	0	0.00291
d__Bacteria	p__Firmicutes	c__Clostridia	o__Clostridiales	f__Lachnospiraceae	g__Lachnospiraceae_NC2004_group	s__unclassified	Lachnospiraceae_NC2004_group unclassified	0	0	0	0	0.00031	0	0	0	0	0	0	0	0	0	0	0	0.0004	0	0	0	0	0	0.00032	0	0	0	0	0	0	3e-05	0	0	0	0	0	0	0	0	0	0	0	0
d__Bacteria	p__Firmicutes	c__Clostridia	o__Clostridiales	f__Lachnospiraceae	g__Lachnospiraceae_ND3007_group	s__unclassified	Lachnospiraceae_ND3007_group unclassified	0	3e-05	0	0	0	0.00013	0	1e-05	4e-05	0	0	0	0	0	0	0	0	0.00014	0	0	0	0	0	0	0	0	0	0	0	0	0	0	0	0	0	0	0	0	0	0	0	0.00398
d__Bacteria	p__Firmicutes	c__Clostridia	o__Clostridiales	f__Lachnospiraceae	g__Lachnospiraceae_NK4A136_group	s__unclassified	Lachnospiraceae_NK4A136_group unclassified	0	0	0	0	0	0	0	0	0	0	0	0	0	0	0	0	0	0	0	0	0	0	0	0	0	0	0	0	0.01036	0.03453	0.079	0.09453	0	0	0	0	0.00824	0.00978	0.01677	0.04723	0	0.01481
d__Bacteria	p__Firmicutes	c__Clostridia	o__Clostridiales	f__Lachnospiraceae	g__Lachnospiraceae_NK4A136_group	s__coccoides	Lachnospiraceae_NK4A136_group coccoides	0	0	0	0	0	0	0	0	0	0	0	0	0	0	0	0	0	0	0	0	0	0	0	0	0	0	0	0	0	0	0	0	0	0	0	0	0	0	0	0	0	0
d__Bacteria	p__Firmicutes	c__Clostridia	o__Clostridiales	f__Lachnospiraceae	g__Lachnospiraceae_NK4B4_group	s__unclassified	Lachnospiraceae_NK4B4_group unclassified	0	0	0	0	0	0	0	0	0	0	0	0	0	0	0	0	0	0	0	0	0	0	0	0	0	0	0	0	0	0	0	0	0	0	0	0	0	0	0	0	9e-05	0
d__Bacteria	p__Firmicutes	c__Clostridia	o__Clostridiales	f__Lachnospiraceae	g__Lachnospiraceae_UCG-001	s__unclassified	Lachnospiraceae_UCG-001 unclassified	0	0.00043	0	0	0	0	0	0	0	0	0	0	0	0	0	0	0	0	0	0	0	0	0	0	0	0	0	0	0	0	0	0	0	0	0	0	0	0	0	0	0	0
d__Bacteria	p__Firmicutes	c__Clostridia	o__Clostridiales	f__Lachnospiraceae	g__Lachnospiraceae_UCG-002	s__unclassified	Lachnospiraceae_UCG-002 unclassified	0	0	0	0	0	0	0	0	0	0	0	0	0	0	0	0	0	0	0	0	0	0	0	0	0	0	0	0	0	0	0	0	0	0	0	0	0	0	0	0	0	1e-05
d__Bacteria	p__Firmicutes	c__Clostridia	o__Clostridiales	f__Lachnospiraceae	g__Lachnospiraceae_UCG-003	s__unclassified	Lachnospiraceae_UCG-003 unclassified	0	0	0	0	0.00086	0	0	0	0	0	0	0	0	0	0	0	0	0	0	0	0	0	0	0	0	0	0	0	0	0	0	0	0	0	0	0	0	0	0	0	0	0
d__Bacteria	p__Firmicutes	c__Clostridia	o__Clostridiales	f__Lachnospiraceae	g__Lachnospiraceae_UCG-004	s__unclassified	Lachnospiraceae_UCG-004 unclassified	0	0	0	0	0	0	0	0	0	0	0	0	0	0	0	0	0	0.0038	0.00145	0	0.00065	0.00221	0.00348	0.002	0	0	0.00016	0.0001	0	0	1e-05	5e-05	4e-05	0	3e-05	0	0	0	0	0	0.00348	0
d__Bacteria	p__Firmicutes	c__Clostridia	o__Clostridiales	f__Lachnospiraceae	g__Lachnospiraceae_UCG-005	s__unclassified	Lachnospiraceae_UCG-005 unclassified	0	0	0	0	0	0	0	0	0	0	0	0	0	0	0	0	0	0	0	0	0	0	0	0	0	0	0	0	0	0	0	0	0	0	0	0	0	0	0	0	0	0.01021
d__Bacteria	p__Firmicutes	c__Clostridia	o__Clostridiales	f__Lachnospiraceae	g__Lachnospiraceae_UCG-006	s__unclassified	Lachnospiraceae_UCG-006 unclassified	0	0	0	0	0	0	0	0	0	0	0	0	0	0	0	0	0	0	0	0	0	0	0	0	0	0	0	0	0	0	0	0	0	0	0	0	0	0	0	0	0	0
d__Bacteria	p__Firmicutes	c__Clostridia	o__Clostridiales	f__Lachnospiraceae	g__Lachnospiraceae_UCG-008	s__unclassified	Lachnospiraceae_UCG-008 unclassified	0.00024	0.00018	0.00014	0	0	0	0	0	0	0	0	0	0.0008	0	0	0	0	0	0	0	0	0	0	0	0	0	0	0	0	0	0	0	0.00082	0.0005	0.00023	0.0002	0	0.00024	0.00046	0.00073	0	0
d__Bacteria	p__Firmicutes	c__Clostridia	o__Clostridiales	f__Lachnospiraceae	g__Lachnospiraceae_UCG-009	s__unclassified	Lachnospiraceae_UCG-009 unclassified	0	0	0	0	0	0	0	0	0	0	0	0	0	0	0	0	0	0	0	0	0	0	0	0	0	0	0	0	0	0	0	0	0	0	0	0	0	0	0	0	0	0
d__Bacteria	p__Firmicutes	c__Clostridia	o__Clostridiales	f__Lachnospiraceae	g__Lachnospiraceae_UCG-010	s__unclassified	Lachnospiraceae_UCG-010 unclassified	0	0	0	0	0.00027	0	0	0	0	0	0	0	0	0	0	0	0	0	0	0	0	6e-05	0.00033	0.00026	0	0	0	0	0	0	0	0	0	0	0	0	0	0	6e-05	0.00028	0.00048	0.00021
d__Bacteria	p__Firmicutes	c__Clostridia	o__Clostridiales	f__Lachnospiraceae	g__Lactonifactor	s__unclassified	Lactonifactor unclassified	0	0	0	0.0008	0	0.0001	0.00073	0	0	0.00078	0.00076	0.0006	0.00072	0.00044	0.00017	7e-05	0	0.0011	0.00215	0.00121	0.00142	0.00082	0.00133	0.00074	0.00013	9e-05	0.00013	0.00025	8e-05	0.00042	0.00035	0.00041	0.00076	0.00349	0.00726	0.00851	0.01139	0.01014	0.00814	0.00384	0	0
d__Bacteria	p__Firmicutes	c__Clostridia	o__Clostridiales	f__Lachnospiraceae	g__Lactonifactor	s__longoviformis	Lactonifactor longoviformis	0	0	0	0	0	0.00013	0	0	0	2e-05	6e-05	2e-05	0	0	0	0	0	0	0	0	0	0	0	0	3e-05	9e-05	1e-05	7e-05	8e-05	3e-05	0	0	0	0	0	0	0	0	0	0	0	0
d__Bacteria	p__Firmicutes	c__Clostridia	o__Clostridiales	f__Lachnospiraceae	g__Moryella	s__unclassified	Moryella unclassified	0	0	0	0	0.00291	0	0	0	0	0	0	0	0	0	0	0	0	0	0	0	0	0	0	0	0	0	0	0	0	0	0.00111	0	0	1e-05	0	0	0	0	0	0	0	0
d__Bacteria	p__Firmicutes	c__Clostridia	o__Clostridiales	f__Lachnospiraceae	g__Pseudobutyrivibrio	s__unclassified	Pseudobutyrivibrio unclassified	0	0	0	0.00051	0	0	0.0032	0.00314	0	0.00014	0.00051	0.00084	0.00075	0.00084	0	0.00214	0	0.00165	0.00024	0.00305	0.00229	0.00174	0.00186	0.0009	0	6e-05	0	0	0	0	0	0	0	0.00345	0.00883	0.00118	0	0	0	0	0.01344	0
d__Bacteria	p__Firmicutes	c__Clostridia	o__Clostridiales	f__Lachnospiraceae	g__Pseudobutyrivibrio	s__fibrisolvens	Pseudobutyrivibrio fibrisolvens	0	0	0	0	0	0	0	0	0	0	0	0	0	0	0	0	0	0	0	0	0	0	0	0	0	0	0	0	0	0	0	0	0	0	0	0	0	0	0	0	0	0
d__Bacteria	p__Firmicutes	c__Clostridia	o__Clostridiales	f__Lachnospiraceae	g__Robinsoniella	s__unclassified	Robinsoniella unclassified	0	0	0	0	0	0	0	0	0	0	0	0	0	0	0	0	0	0	0	0	0	0	0	0	0	0	0	0	0	0	0	0	0	0	0	0	0	0	0	0	0	0
d__Bacteria	p__Firmicutes	c__Clostridia	o__Clostridiales	f__Lachnospiraceae	g__Roseburia	s__unclassified_96% / faecis_3%	Roseburia unclassified	0.00029	0.00023	0	3e-05	0	0.0002	0	0.00087	0.00085	0	0	5e-05	0	0	0.00158	0.00066	0.00051	0	0	0	0	0	0	0	0	0	0	0	0	0	0	0	0	9e-05	9e-05	6e-05	6e-05	0	0	0	0.00242	0.02643
d__Bacteria	p__Firmicutes	c__Clostridia	o__Clostridiales	f__Lachnospiraceae	g__Roseburia	s__faecis	Roseburia faecis	0	0	0	0	0	0	0	0	1e-05	0	0	0	0	0	0	0	0	0	0	0	1e-05	0	0	1e-05	0	0	0	0	0	0	0	0	3e-05	0.00039	0.0004	0.0005	0.00012	0	2e-05	0	0.00316	0.00434
d__Bacteria	p__Firmicutes	c__Clostridia	o__Clostridiales	f__Lachnospiraceae	g__Roseburia	s__hominis	Roseburia hominis	0	0	0	0	0	0	0	0	0	0	0	0	0	0	0	0	0	0	0	0	0	0	0	0	0	0	0	0	0	0	0	0	0	0	0	0	0	0	0	0	0.00181	0.00223
d__Bacteria	p__Firmicutes	c__Clostridia	o__Clostridiales	f__Lachnospiraceae	g__Roseburia	s__intestinalis	Roseburia intestinalis	1e-05	1e-05	0	1e-05	0	0	0	1e-05	0	0	0	0	0	0	0	0	0	2e-05	0	0	0	0	0	0	0	0	0	0	0	0	0	0	0	0	0	0	0	0	0	0	0.00114	0.00109
d__Bacteria	p__Firmicutes	c__Clostridia	o__Clostridiales	f__Lachnospiraceae	g__Roseburia	s__inulinivorans	Roseburia inulinivorans	1e-05	0	0	0	0	0	0	0	0	0	0	0	0	0	0	0	0	0	0	0	0	0	0	0	0	0	0	0	0	0	0	0	0	0	0	0	0	0	0	0	0.00312	0.002
d__Bacteria	p__Firmicutes	c__Clostridia	o__Clostridiales	f__Lachnospiraceae	g__Shuttleworthia	s__germanica	Shuttleworthia germanica	0	0	0	0	0	0	0	0	0	0	0	0	0	0	0	0	0	0	0	0	0	0	0	0	0	0	0	0	0	0	0	0	0	0	0	0	0	0	0	0	0	0
d__Bacteria	p__Firmicutes	c__Clostridia	o__Clostridiales	f__Lachnospiraceae	g__Stomatobaculum	s__unclassified	Stomatobaculum unclassified	0	0	0	0	0	0	0	0	0	0	0	0	0	0	0	0	0	0	0	0	0	0	0	0	0	0	0	0	0	0	0	0	0	0	0	0	0	0	0	0	2e-05	0
d__Bacteria	p__Firmicutes	c__Clostridia	o__Clostridiales	f__Lachnospiraceae	g__Tyzzerella_3	s__unclassified	Tyzzerella_3 unclassified	0	0	0	0	0	0	0	0	0	0	0	0	0	0	0	0	0	0	0	0	0	0	0	0	0	0	0	0	0	0	0	0	0	0	0	0	0	0	0	0	1e-05	2e-05
d__Bacteria	p__Firmicutes	c__Clostridia	o__Clostridiales	f__Lachnospiraceae	g__Tyzzerella_4	s__unclassified	Tyzzerella_4 unclassified	0	0	0	0	0	0	0	0	0	0	0	0	0	0	0	0	0	0	0	0	0	0	0	0	0	0	0	0	0	0	0	0	0	0	0	0	0	0	0	0	0	0
d__Bacteria	p__Firmicutes	c__Clostridia	o__Clostridiales	f__Lachnospiraceae	g__Tyzzerella_4	s__nexilis	Tyzzerella_4 nexilis	0	0	0	0	0	0	0	0	0	0	0	0	0	0	0	0	0	0	0	0	0	0	0	0	0	0	0	0	0	3e-05	0	0	0	1e-05	0	0	0	0	0	0	0	0
d__Bacteria	p__Firmicutes	c__Clostridia	o__Clostridiales	f__Lachnospiraceae	g__[Eubacterium]_hallii_group	s__unclassified	[Eubacterium]_hallii_group unclassified	0	0	4e-05	0	0	0	5e-05	0	0	0	0	0	0	0	0	0	0	0.00026	0	0	0	0	0	0	0	0	0	0	0	0	0	0	0	0	0	0	0	0	0	0	0	0
d__Bacteria	p__Firmicutes	c__Clostridia	o__Clostridiales	f__Lachnospiraceae	g__[Eubacterium]_oxidoreducens_group	s__unclassified	[Eubacterium]_oxidoreducens_group unclassified	0	0	0	0	1e-05	0	0	0	0	0	0	0	0	0	0	0	0	0	0	0	0	0	0.01511	0	0	0.07882	0	0	0	0	0.17938	0	0	0	0	0	0	0	0	0	0	0
d__Bacteria	p__Firmicutes	c__Clostridia	o__Clostridiales	f__Lachnospiraceae	g__[Eubacterium]_ruminantium_group	s__unclassified	[Eubacterium]_ruminantium_group unclassified	0	0	0	0	0	0	0	0	0	0	0	0	0	0	0	0	0	0	0	0	0	0	0	0	0	0	0	0	0	0	0	0	0	0	0	0	0	0	0	0	0.00153	0.00138
d__Bacteria	p__Firmicutes	c__Clostridia	o__Clostridiales	f__Lachnospiraceae	g__[Eubacterium]_ventriosum_group	s__unclassified	[Eubacterium]_ventriosum_group unclassified	0	0	0	0	0	0	0	0	0	0	0	0	0	0	0	0	0	0	0	0	0	0	0	0	0	0	0	0	0	6e-05	0.00047	0.0005	0	0	0	0	0	0	0	0	0.00197	0
d__Bacteria	p__Firmicutes	c__Clostridia	o__Clostridiales	f__Lachnospiraceae	g__[Eubacterium]_ventriosum_group	s__ventriosum	[Eubacterium]_ventriosum_group ventriosum	0	0	0	0	0	0	0	0	0	0	0	0	0	0	0	0	0	0	0	0	0	0	0	0	0	0	0	0.00011	0	0.0023	0.04781	0.04623	0	0	0	0	0	0	0	0	0.00316	0
d__Bacteria	p__Firmicutes	c__Clostridia	o__Clostridiales	f__Lachnospiraceae	g__[Ruminococcus]_gauvreauii_group	s__unclassified	[Ruminococcus]_gauvreauii_group unclassified	0	0	0	0	0.00022	0	0	0	0	0	0	0	0	0.00015	0	0	0	0	0	0	0	0	0	0	0	0	0	0	0	0	0	0	0	0	0	0	0	0	0	0	0	0
d__Bacteria	p__Firmicutes	c__Clostridia	o__Clostridiales	f__Peptococcaceae	g__unclassified		X-unclassified	0	0	0	0.00017	0	6e-05	0	0	0	0.00038	0.00018	0.0001	0.00019	0.00019	0.00014	0	7e-05	0	0	0	0	0	0	0.00019	1e-05	0	0.00012	2e-05	0.00019	7e-05	5e-05	7e-05	0	0	0	0	0	0	0	0	0.00018	6e-05
d__Bacteria	p__Firmicutes	c__Clostridia	o__Clostridiales	f__Peptococcaceae	g__Peptococcus	s__unclassified	Peptococcus unclassified	2e-05	2e-05	2e-05	0	0	3e-05	3e-05	0	0	0	0	4e-05	0	0	0	0	1e-05	0	0	0.00013	0.00034	0.00038	0.00035	0.00022	0.00049	0.00051	0.0004	0.00048	0.00084	0.003	0.00106	0.00077	0	0	0	0	0	0	0	0	0.0011	0.00025
d__Bacteria	p__Firmicutes	c__Clostridia	o__Clostridiales	f__Peptostreptococcaceae	g__Peptoclostridium_68% / Intestinibacter_22% / Romboutsia_8%		X-unclassified	4e-05	0	0	0	0	0	0	0	0	0	0	0	0	0	0	0	0	0	0	0	0	0	0	0	0	0	0	0	0	0	0	0	0	0	0	0	0	0	0	0	0	0.00067
d__Bacteria	p__Firmicutes	c__Clostridia	o__Clostridiales	f__Peptostreptococcaceae	g__Intestinibacter	s__unclassified	Intestinibacter unclassified	0.00035	0.00047	0.00036	0	0	1e-05	0	0	0	0	0	0	0	0	1e-05	0	0	0	0	0	0	1e-05	0	0	0	0	0	0	0	0	0	0	0	0	0	0	0	0	0	0	8e-05	0.0016
d__Bacteria	p__Firmicutes	c__Clostridia	o__Clostridiales	f__Peptostreptococcaceae	g__Intestinibacter	s__bartlettii	Intestinibacter bartlettii	1e-05	5e-05	2e-05	0	0	0	0	0	0	0	0	0	0	0	0	0	0	0	0	0	0	0	0	0	0	0	0	0	0	0	0	0	0	0	0	0	0	0	0	0	0.00028	0.00143
d__Bacteria	p__Firmicutes	c__Clostridia	o__Clostridiales	f__Peptostreptococcaceae	g__Peptoclostridium	s__unclassified	Peptoclostridium unclassified	0	0	0	0	0	0	0	0	0	0	0	0	0	0	0	0	0	0	0	0	0	0	0	0	0	0	0	0	0	0	0	0	0	0	0	0	0	0	0	0	0.00026	0
d__Bacteria	p__Firmicutes	c__Clostridia	o__Clostridiales	f__Peptostreptococcaceae	g__Peptoclostridium	s__difficile	Peptoclostridium difficile	0	0	0	0	0	0	0	0	0	0	0	0	0	0	0	0	0	0	0	0	0	0	0	0	0	0	0	0	0	0	0	0	0	0	0	0	0	0	0	0	0	0
d__Bacteria	p__Firmicutes	c__Clostridia	o__Clostridiales	f__Peptostreptococcaceae	g__Peptostreptococcus	s__unclassified	Peptostreptococcus unclassified	0	0	0	0	0	0	0	0	0	0	0	0	0	0	0	0	0	0	0	0	0	0	0	0	0	0	0	0	0	0	0	0	0	0	0	0	0	0	0	0	0	7e-05
d__Bacteria	p__Firmicutes	c__Clostridia	o__Clostridiales	f__Peptostreptococcaceae	g__Peptostreptococcus	s__anaerobius	Peptostreptococcus anaerobius	0	0	0	0	0	0	0	0	0	0	0	0	0	0	0	0	0	0	0	0	0	0	0	0	0	0	0	0	0	0	0	0	0	0	0	0	0	0	0	0	0	0
d__Bacteria	p__Firmicutes	c__Clostridia	o__Clostridiales	f__Peptostreptococcaceae	g__Peptostreptococcus	s__stomatis	Peptostreptococcus stomatis	0	0	0	0	0	0	0	0	0	0	0	0	0	0	0	0	0	0	0	0	0	0	0	0	0	0	0	0	0	0	0	0	0	0	0	0	0	0	0	0	4e-05	1e-05
d__Bacteria	p__Firmicutes	c__Clostridia	o__Clostridiales	f__Peptostreptococcaceae	g__Romboutsia	s__unclassified	Romboutsia unclassified	0	0	0	0	0	0	0	0	0	0	0	0	0	0	0	0	0	0	0	0	0	0	0	0	0	0	0	0	0	0	0	0	0	0	0	0	0	0	0	0	0	1e-05
d__Bacteria	p__Firmicutes	c__Clostridia	o__Clostridiales	f__Peptostreptococcaceae	g__Romboutsia	s__lituseburensis	Romboutsia lituseburensis	0	0	0	0	0	0	0	0	0	0	0	0	0	0	0	0	0	0	0	0	0	0	0	0	0	0	0	0	0	0	0	0	0	0	0	0	0	0	0	0	0	0
d__Bacteria	p__Firmicutes	c__Clostridia	o__Clostridiales	f__Peptostreptococcaceae	g__Romboutsia	s__ruminantium	Romboutsia ruminantium	0	0	0	0	0.04922	0	0	0	0	0	0	0	0	0	0	0	0	0	0	0	0	0	0	0	0	0	0	0	0	0	0	0	0	0	0	0	0	0	0	0	0.00079	1e-05
d__Bacteria	p__Firmicutes	c__Clostridia	o__Clostridiales	f__Ruminococcaceae	g__unclassified_41% / Ruminococcaceae_UCG-002_16% / Ruminococcaceae_UCG-005_6% / Ruminococcaceae_UCG-014_6% / Ruminococcaceae_NK4A214_group_6% / Ruminococcus_1_6% / Ruminococcaceae_UCG-003_6% / Ruminiclostridium_2% / Ruminococcaceae_UCG-011_2% / Ruminiclostridium_9_1% / Anaerotruncus_1%		X-unclassified	0.00058	0.00073	0.00035	0.02121	0	0.02099	0.02663	0.00521	0.00372	0.01663	0.01983	0.02582	0.02217	0.01879	0.02934	0.01561	0.04069	0.00069	0.01571	0.00881	0.0109	0.01381	0.01685	0.01514	0.02156	0.00699	0.01692	0.0197	0.03757	0.04573	0.01262	0.01289	0.00037	0.00588	0.01107	0.01649	0.02612	0.02049	0.01085	0.00511	0.06941	0.02186
d__Bacteria	p__Firmicutes	c__Clostridia	o__Clostridiales	f__Ruminococcaceae	g__Acetanaerobacterium	s__unclassified	Acetanaerobacterium unclassified	0	0	0	0.0003	0	0	2e-05	0	1e-05	0.00023	0.00034	0.00012	0.00019	6e-05	0.00032	0	0.00024	1e-05	6e-05	3e-05	0	0	0.00058	0.00025	0	6e-05	0	6e-05	1e-05	1e-05	0	0	9e-05	0.00087	0.00019	5e-05	9e-05	0.00022	0.00025	0.00093	0	0
d__Bacteria	p__Firmicutes	c__Clostridia	o__Clostridiales	f__Ruminococcaceae	g__Acetivibrio	s__cellulolyticus	Acetivibrio cellulolyticus	0	0	0	0	0.00036	0	0	0	0	0	0	0	0	0	0	0	0	0	0	0	0	0	0	0	0	0	0	0	0	0	0	0	0	0	0	0	0	0	0	0	0	0
d__Bacteria	p__Firmicutes	c__Clostridia	o__Clostridiales	f__Ruminococcaceae	g__Anaerofilum	s__unclassified	Anaerofilum unclassified	0	0	0	0.00041	0.00059	0.00092	0	0	0	0.00058	0.00042	0.00057	0.0003	0.00059	0.00033	0.00059	0.00065	0	0	0.00023	0.0001	0.00025	7e-05	0.00015	9e-05	0.00018	0.00012	0.00021	0.00015	0.00012	0.00062	0.00088	0	0	2e-05	6e-05	0.00028	0.00027	0.00041	0.00023	2e-05	0
d__Bacteria	p__Firmicutes	c__Clostridia	o__Clostridiales	f__Ruminococcaceae	g__Anaerotruncus	s__unclassified	Anaerotruncus unclassified	0	0	0	0.0001	0.00012	0.00078	0	0	0	4e-05	0.0001	4e-05	0	0.00015	0	7e-05	0.00021	0	0	0	0	0	0	3e-05	0.00279	0.00384	0.00358	0.00523	0.00844	0.01142	0.00209	0.0034	0	0	0.00019	0.00168	0.02551	0.03002	0.03848	0.01685	0	0.00043
d__Bacteria	p__Firmicutes	c__Clostridia	o__Clostridiales	f__Ruminococcaceae	g__Anaerotruncus	s__colihominis	Anaerotruncus colihominis	1e-05	0	0	0.00017	0	5e-05	0	0	0	0.00031	0.00059	0.00041	0.0008	0.0011	0.00086	0.00096	0.00057	0	0	0	0	3e-05	0.00035	0.00049	0	0	0	0	0.00155	0.00101	0.00043	0.00046	0	0	0	0	0	0.00016	0.00041	0.00042	0	0
d__Bacteria	p__Firmicutes	c__Clostridia	o__Clostridiales	f__Ruminococcaceae	g__Candidatus_Soleaferrea	s__unclassified	Candidatus_Soleaferrea unclassified	0	1e-05	0	0.00042	0.00079	0.00041	0.00027	0.00047	0.00033	0.00033	0.00025	0.00035	0.00037	0.00024	0.00048	7e-05	3e-05	0.00042	0.00042	0.00016	0.00023	0.00021	9e-05	0.00038	0.00013	0.00033	0.0002	0.00025	0.00029	0.00094	0.00059	0.00051	9e-05	0.00047	0.00057	0.00032	0.00062	0.00044	9e-05	0.00028	0.0001	0
d__Bacteria	p__Firmicutes	c__Clostridia	o__Clostridiales	f__Ruminococcaceae	g__Faecalibacterium	s__unclassified	Faecalibacterium unclassified	4e-05	0	7e-05	0.00017	0.008	0.00154	0.00022	0.00166	0.00118	0.00022	0.00025	0.00024	0.00019	6e-05	0.00027	0.00014	0.00032	0.00023	0.00017	0.00016	0	7e-05	0.00015	0.00049	0.00019	0.00054	0.00036	0.00031	0.00151	0.00188	0.00033	0.00163	0.00056	0.00086	0.00057	0.00058	9e-05	3e-05	3e-05	0	0.01562	0.02324
d__Bacteria	p__Firmicutes	c__Clostridia	o__Clostridiales	f__Ruminococcaceae	g__Faecalibacterium	s__prausnitzii	Faecalibacterium prausnitzii	0.00034	0.00036	0.00015	0.03118	0	0.0305	0.04826	0.07712	0.02307	0.03438	0.02589	0.01536	0.00872	0.01361	0.03323	0.03463	0.02347	0.05358	0.01908	0.01391	0.01373	0.00533	0.01768	0.02622	0.00069	0.00071	0.00118	0.00157	0.00331	0.00941	0.04632	0.08691	0.12135	0.14992	0.09302	0.08168	0.02263	0.01176	0.00742	0.0086	0.11468	0.04986
d__Bacteria	p__Firmicutes	c__Clostridia	o__Clostridiales	f__Ruminococcaceae	g__Fastidiosipila	s__unclassified	Fastidiosipila unclassified	0	0	0	0.0003	0.00572	0	0	0	0	9e-05	3e-05	0	1e-05	0	4e-05	0	0	0	0	0	8e-05	0.00028	0.0002	0	1e-05	0	0	0	0	0	0	0	0	0	0	0	0	0	0	0	0	0
d__Bacteria	p__Firmicutes	c__Clostridia	o__Clostridiales	f__Ruminococcaceae	g__Flavonifractor	s__plautii_69% / orbiscindens_26% / unclassified_4%	Flavonifractor unclassified	0	2e-05	0	0	0	0.00667	0	0.00047	0.00012	0	0.00022	0	0	0	0	0	0	0	5e-05	0	6e-05	0	3e-05	3e-05	0	0	0	0	0	4e-05	2e-05	5e-05	0	0	4e-05	0.00314	0.00171	0.00083	0.00075	0	0.00082	0
d__Bacteria	p__Firmicutes	c__Clostridia	o__Clostridiales	f__Ruminococcaceae	g__Flavonifractor	s__orbiscindens	Flavonifractor orbiscindens	0	0	0	0.00045	0	0	0	0	0	0.00049	0	0	0.00034	0.00073	0.00054	0.00022	0.00119	6e-05	0	0	0	0.00146	0	0	0.00087	0.00122	0.00075	0.00037	0.00048	0	0	0	0	0.00573	0.00382	0	0	0	0	0	0	0
d__Bacteria	p__Firmicutes	c__Clostridia	o__Clostridiales	f__Ruminococcaceae	g__Flavonifractor	s__plautii	Flavonifractor plautii	0	0	0	0.00304	0	0	0.01342	0	0	0.00257	0.00114	0.00133	0.0012	0.00152	0.0015	0.00059	0.00433	0.02123	0.01906	0.01297	0.00794	0.0044	0.00381	0.00353	0.00388	0.00444	0.00295	0.00243	0.00627	0.00609	0.00116	0.00477	0.00017	0.00611	0.01853	0.02475	0.03316	0.03279	0.02672	0.01419	0	0
d__Bacteria	p__Firmicutes	c__Clostridia	o__Clostridiales	f__Ruminococcaceae	g__Hydrogenoanaerobacterium	s__unclassified	Hydrogenoanaerobacterium unclassified	0	0	0	0	0	0.00023	0	0	0	0	0	0	0	0	0	0	0	0	0	0	0	0	0	0	0	0	0	0	0	0	0	0	0	0	0	0	0	0	0	0	0	0
d__Bacteria	p__Firmicutes	c__Clostridia	o__Clostridiales	f__Ruminococcaceae	g__Intestinimonas	s__unclassified	Intestinimonas unclassified	0	0	0	3e-05	0.0041	0	0	0	0	0	0	0	0	0	0	0	0	0	0	0	0	0	2e-05	1e-05	0	0	0	0	0	0	0	0	0	0	0	3e-05	0	0	0	0	5e-05	0
d__Bacteria	p__Firmicutes	c__Clostridia	o__Clostridiales	f__Ruminococcaceae	g__Intestinimonas	s__butyriciproducens	Intestinimonas butyriciproducens	0	0	0	0.02801	0	0.00437	0	0	0	0.01333	0.00889	0.00853	0.00744	0.0056	0.01407	0.00281	0.01543	0.0002	0.0017	0.00433	0.00347	0.006	0.00807	0.00737	0.00196	0.00249	0.00111	0.00084	0.00075	0.0022	0.00979	0.01246	6e-05	0.00145	0.01964	0.03229	0.03193	0.02578	0.014	0.00517	4e-05	0
d__Bacteria	p__Firmicutes	c__Clostridia	o__Clostridiales	f__Ruminococcaceae	g__Oscillibacter	s__unclassified	Oscillibacter unclassified	0	0	0	0	0	1e-05	0	0	0	0.00051	0	0	0	0	0	0	0	0	0	0	0	0	0	0	0	0	0	0	0	0	0	0	0	0	0	0	0	0	0	0	0	5e-05
d__Bacteria	p__Firmicutes	c__Clostridia	o__Clostridiales	f__Ruminococcaceae	g__Oscillibacter	s__ruminantium	Oscillibacter ruminantium	0	0	0	0	0	0.00077	0	0	1e-05	0	0	0	0	0	0	0	0	0	0	0	0	0	0	0	0	0	0	0	0	0	0	0	0	0	0	0	0	0	0	0	0	0
d__Bacteria	p__Firmicutes	c__Clostridia	o__Clostridiales	f__Ruminococcaceae	g__Oscillospira	s__unclassified	Oscillospira unclassified	0	0	0	0	0	0	0	0	0	0	0	0	0	0	0	0	0	0	0	0	0	0	0	0	0	0	0	0	0	0	0	0	0	0	0	0	0	0	0	0	0.00024	0
d__Bacteria	p__Firmicutes	c__Clostridia	o__Clostridiales	f__Ruminococcaceae	g__Papillibacter	s__unclassified	Papillibacter unclassified	0	0	0	0	2e-05	0	0	0	0	0	0	0	0	0	0	0	0	0	0	0	0	0	0	0	0	0	0	0	0	0	0	0	0	0	0	0	0	0	0	0	0.00013	2e-05
d__Bacteria	p__Firmicutes	c__Clostridia	o__Clostridiales	f__Ruminococcaceae	g__Ruminiclostridium	s__unclassified	Ruminiclostridium unclassified	0	0	2e-05	0	0	0.00013	0.00563	9e-05	6e-05	0	0.00026	0	0	0.00037	0	0.00022	0.00028	0.00631	0	0	0	0	0	0	0	0	4e-05	0	2e-05	0	2e-05	0	0.00026	0	0	0	0	0	0.00211	0.00181	0	0
d__Bacteria	p__Firmicutes	c__Clostridia	o__Clostridiales	f__Ruminococcaceae	g__Ruminiclostridium_1	s__unclassified	Ruminiclostridium_1 unclassified	0	0	0	0	0.00018	0	0	0	0	0	0	0	0	0	0	0	0	0	0	0	0	0	0	0	0	0	0	0	0	0	0	0	0	0	0	0	0	0	0	0	4e-05	4e-05
d__Bacteria	p__Firmicutes	c__Clostridia	o__Clostridiales	f__Ruminococcaceae	g__Ruminiclostridium_5	s__unclassified	Ruminiclostridium_5 unclassified	0	0	0	0.00024	0	0.00129	0	3e-05	1e-05	0.00014	0	0	0	2e-05	2e-05	0	3e-05	1e-05	1e-05	0	0	0	6e-05	0	9e-05	0	0	0	0.00024	0.00062	3e-05	0	0	0	0.00013	0	0	0	0	0	0	0
d__Bacteria	p__Firmicutes	c__Clostridia	o__Clostridiales	f__Ruminococcaceae	g__Ruminiclostridium_6	s__unclassified	Ruminiclostridium_6 unclassified	0	1e-05	0	0	0.00066	0	0	0	0	0	0	0	0	0	0	0	0	0	0	0	0	0	0	0	0	0	0	0	0	0	0	0	0	0	0	0	0	0	0	0	0.00053	0
d__Bacteria	p__Firmicutes	c__Clostridia	o__Clostridiales	f__Ruminococcaceae	g__Ruminiclostridium_9	s__unclassified	Ruminiclostridium_9 unclassified	0	0	0	0.00439	0	0	0.00015	0.00889	0.00946	0.00153	0.00103	0.00083	0.00083	0.00139	0.00254	0.00451	0.0034	0.00248	0.00245	0.00019	0.00017	0.00013	0.00026	0	0.00201	0.0025	0.00204	0.0017	0.00209	0.00297	0.0041	0.0027	0	0	0.00552	0.02047	0.00779	0.00244	0.00181	0.00067	0.00185	0
d__Bacteria	p__Firmicutes	c__Clostridia	o__Clostridiales	f__Ruminococcaceae	g__Ruminococcaceae_NK4A214_group	s__unclassified	Ruminococcaceae_NK4A214_group unclassified	0	0.00014	0	0	0	0	0	0	0	0	0	0	0	0	0	0	0	0	0	0	0	0	0	0	0	0	0	0	0	0	0	0	0	0	0	4e-05	0	0	0.0002	0.00022	0	0
d__Bacteria	p__Firmicutes	c__Clostridia	o__Clostridiales	f__Ruminococcaceae	g__Ruminococcaceae_UCG-002	s__unclassified	Ruminococcaceae_UCG-002 unclassified	0	0	0	0	0	0.06585	0	0.00018	0	0	0	0	0	0	0	0	0	0	0	0	0	0	0	0	0	0	0	0	0	0	0	0	0	0	0	0	0	0	0	0	0	0
d__Bacteria	p__Firmicutes	c__Clostridia	o__Clostridiales	f__Ruminococcaceae	g__Ruminococcaceae_UCG-003	s__unclassified	Ruminococcaceae_UCG-003 unclassified	0	0	0	0	0	0.00035	0	0	0	0	0	0	0	0.00117	0	0	0	1e-05	0	0	0	0	0	0	0	0	0	0	0	0	0	0	0	0	0	0	0	0	0	0	0	0
d__Bacteria	p__Firmicutes	c__Clostridia	o__Clostridiales	f__Ruminococcaceae	g__Ruminococcaceae_UCG-004	s__unclassified	Ruminococcaceae_UCG-004 unclassified	0	0	0	0	0	5e-05	0	0	0	0	0	0	0	0	0	0	0	0	0	0	0	0	0	0	0	0	0	0	0	0	0	0	0	0	0	0	0	0	0	0	0.0003	0
d__Bacteria	p__Firmicutes	c__Clostridia	o__Clostridiales	f__Ruminococcaceae	g__Ruminococcaceae_UCG-005	s__unclassified	Ruminococcaceae_UCG-005 unclassified	0	0	0	0.00016	0	0	0	0	0	9e-05	6e-05	0	0	8e-05	0	0.00029	0	0	0	0	0	0	8e-05	0	0.00424	5e-05	0.00268	0.00231	0	0	0	0.00029	0	0	0	0	0	7e-05	0	4e-05	0	0.00678
d__Bacteria	p__Firmicutes	c__Clostridia	o__Clostridiales	f__Ruminococcaceae	g__Ruminococcaceae_UCG-009	s__unclassified	Ruminococcaceae_UCG-009 unclassified	0	0	0	0	0	0	0	0	0	0	0	0	0	0	0	0	0	0	0	0	0	0	0	0	0	0	0	0	0	0	0	0	0	0	0	0	0	0	0	0	0.00014	6e-05
d__Bacteria	p__Firmicutes	c__Clostridia	o__Clostridiales	f__Ruminococcaceae	g__Ruminococcaceae_UCG-010	s__unclassified	Ruminococcaceae_UCG-010 unclassified	0	1e-05	0	0	0.09982	0	0	0	0	0	1e-05	0	4e-05	0	0	0	0	0	0	0	0	0	6e-05	0	0	0	1e-05	1e-05	0	0	0	0	0	0	0	0	0	1e-05	1e-05	0	0.00632	0.00137
d__Bacteria	p__Firmicutes	c__Clostridia	o__Clostridiales	f__Ruminococcaceae	g__Ruminococcaceae_UCG-013	s__unclassified	Ruminococcaceae_UCG-013 unclassified	0.00049	0	0	0.17458	0.02865	0.14391	0.01143	0.00092	0.00074	0.2216	0.25933	0.23033	0.25338	0.23536	0.19295	0.05425	0.08094	0.03349	0.10921	0.16778	0.20517	0.22062	0.23973	0.27608	0	0	0	0	0	0	0	0	0	0	0	0	0	0	0	0	0.01107	0
d__Bacteria	p__Firmicutes	c__Clostridia	o__Clostridiales	f__Ruminococcaceae	g__Ruminococcaceae_UCG-014	s__unclassified	Ruminococcaceae_UCG-014 unclassified	9e-05	0.00026	9e-05	0	0	0	0	0	0	0	0	0	0	0	0	0	0	0	0	0	0	0	0	0	0	0	0	0	0	0	0	0	0	0	0	0	0	0	0	0	0	0.01246
d__Bacteria	p__Firmicutes	c__Clostridia	o__Clostridiales	f__Ruminococcaceae	g__Ruminococcaceae_V9D2013_group	s__unclassified	Ruminococcaceae_V9D2013_group unclassified	0	0	0	0	0	0	0	0	0	0	0	0	0	0	0	0	0	0	0	0	0	0	0	0	0	0	0	0	0	0	0	0	0	0	0	0	0	0	0	0	5e-05	0
d__Bacteria	p__Firmicutes	c__Clostridia	o__Clostridiales	f__Ruminococcaceae	g__Ruminococcus_1	s__unclassified	Ruminococcus_1 unclassified	0	0.00035	0	0	0	0	0	0	0	0	0	0	0	0	0	0	0.00024	0.02057	0	0	0	0	0	0	0	0	0	0	0	0	0	0	0	0	0	0	0	7e-05	7e-05	0	0.02762	0.0511
d__Bacteria	p__Firmicutes	c__Clostridia	o__Clostridiales	f__Ruminococcaceae	g__Ruminococcus_1	s__bicirculans	Ruminococcus_1 bicirculans	0	0	0	0	0	0	0	0	0	0	0	0	0	0	0	0	0	0	0	0	0	0	0	0	0	0	0	0	0	0	0	0	0	0	0	0	0	0	0	0	0.00033	0.00032
d__Bacteria	p__Firmicutes	c__Clostridia	o__Clostridiales	f__Ruminococcaceae	g__Ruminococcus_1	s__callidus	Ruminococcus_1 callidus	0	1e-05	0	0	0	0	0	0	0	0	0	0	0	0	0	0	0	0	0	0	0	0	0	0	0	0	0	1e-05	0	0	0	0	0	0	0	0	0	0	0	0	0.00445	0.00242
d__Bacteria	p__Firmicutes	c__Clostridia	o__Clostridiales	f__Ruminococcaceae	g__Ruminococcus_1	s__champanellensis	Ruminococcus_1 champanellensis	0	0	0	0	0	0	0	0	0	0	0	0	0	0	0	0	1e-05	0	0	0	0	0	0	0	0	0	0	0	0	0	0	0	0	0	0	0	0	0	0	0	0	0
d__Bacteria	p__Firmicutes	c__Clostridia	o__Clostridiales	f__Ruminococcaceae	g__Ruminococcus_1	s__flavefaciens	Ruminococcus_1 flavefaciens	0	0	0	0	0	0	0	0	0	0	0	0	0	0	0	0	0	0	0	0	0	0	0	0	0	0	0	0	0	0	0	0	0	0	0	0	0	0	0	0	0.00016	0
d__Bacteria	p__Firmicutes	c__Clostridia	o__Clostridiales	f__Ruminococcaceae	g__Ruminococcus_2	s__unclassified	Ruminococcus_2 unclassified	0.00026	0.00019	0.00025	0	0.00178	8e-05	0	0	0	0	0	0	0	0	0	0	0	0	0	0	0	0	0	0	0	0	0	0	0	0	0	0	0	0	0	0	0	0	0	0	0.0518	0.03111
d__Bacteria	p__Firmicutes	c__Clostridia	o__Clostridiales	f__Ruminococcaceae	g__Ruminococcus_2	s__bromii	Ruminococcus_2 bromii	0.00049	0.00053	0.00034	0.00098	0.00017	0.00389	0	0	0	0.00082	0.00137	0.00357	0.00364	0.00644	0.00256	0.00207	0.00509	0	0.00175	0.00148	0.00094	0.00072	0.00038	0.00074	0.00192	0.00161	0.00246	0.00305	0.00858	0.01103	0.0086	0.01243	0	0.00016	0.00666	0.00583	0.0033	0.00246	0.00193	0.00111	0.00977	0.01747
d__Bacteria	p__Firmicutes	c__Clostridia	o__Clostridiales	f__Ruminococcaceae	g__Subdoligranulum	s__unclassified	Subdoligranulum unclassified	0.00014	0.00018	0.00026	0	8e-05	0.0056	0	0.00055	0.00022	0	0	0	0	0	0	0	0	0	0	0	2e-05	0	0	0	0	5e-05	0	0.00031	0	0	0	0	0	2e-05	0	9e-05	9e-05	9e-05	0	0	0.01051	0.01648
d__Bacteria	p__Firmicutes	c__Clostridia	o__Clostridiales	f__Ruminococcaceae	g__Subdoligranulum	s__formicilis	Subdoligranulum formicilis	0.00034	0.00058	0.00024	0.00062	0	0.00057	0	0.0004	0.00012	0.00035	0	0.00035	0.0001	8e-05	2e-05	0	0	0	0	0	0	0	0	0	0	0	0.0001	2e-05	0	0	0	0	0	0	0	0	0	0	0	0	0.01511	0.01767
d__Bacteria	p__Firmicutes	c__Clostridia	o__Clostridiales	f__Ruminococcaceae	g__[Eubacterium]_coprostanoligenes_group	s__unclassified	[Eubacterium]_coprostanoligenes_group unclassified	0.00014	0.00016	4e-05	0	0	0	5e-05	0	0	5e-05	0	0	0	0	0	0	0	0	0	0	0	0	0	0.00088	0	0	0	0	0	0	0	0	0	0	5e-05	0	0	0.0001	0.00029	0.00026	0.04189	0.02074
d__Bacteria	p__Firmicutes	c__Clostridia	o__Thermoanaerobacterales	f__Thermoanaerobacteraceae	g__Gelria	s__unclassified	Gelria unclassified	0	0	0	0	0	0	0	0	0	0	0	0	0	0	0	0	0	0	0	0	0	0	0	0	0	0	0	0	0	0	0	0	0	0	0	0	0	0	0	0	0	2e-05
d__Bacteria	p__Firmicutes	c__Erysipelotrichia	o__Erysipelotrichales	f__Erysipelotrichaceae	g__unclassified_79% / Solobacterium_20%		X-unclassified	0	0	8e-05	0	0	0	0.0052	1e-05	6e-05	0	0	0	0	0	0	0	0	0.00618	0.00482	0.00073	0.00028	0.00015	6e-05	2e-05	0	0	0	0	0	0	0	0	0	0	0	0	0	0	0	0	0.00025	6e-05
d__Bacteria	p__Firmicutes	c__Erysipelotrichia	o__Erysipelotrichales	f__Erysipelotrichaceae	g__Asteroleplasma	s__unclassified	Asteroleplasma unclassified	0	0	0	0	0	0	0	0	0	0	0	0	0	0	0	0	0	0	0	0	0	0	0	0	0	0	0	0	0	0	0	0	0	0	0	0	0	0	0	0	0.00075	0
d__Bacteria	p__Firmicutes	c__Erysipelotrichia	o__Erysipelotrichales	f__Erysipelotrichaceae	g__Catenibacterium	s__unclassified	Catenibacterium unclassified	0	0	0	0	0	0	0	0	0	0	0	0	0	0	0	0	0	0	0	0	0	0	0	0	0	0	0	0	0	0	0	0	0	0	0	0	0	0	0	0	2e-05	0.00013
d__Bacteria	p__Firmicutes	c__Erysipelotrichia	o__Erysipelotrichales	f__Erysipelotrichaceae	g__Catenibacterium	s__mitsuokai	Catenibacterium mitsuokai	6e-05	0	0	0	0	0	0	4e-05	0	0	0	0	0	0	0	0	0	0	0	0	0	0	0	0	0	0	0	0	0	0	0	0	0	0	0	0	0	0	0	0	0.00531	0.00259
d__Bacteria	p__Firmicutes	c__Erysipelotrichia	o__Erysipelotrichales	f__Erysipelotrichaceae	g__Clostridium	s__aff.	Clostridium aff.	0	0	0	0	0	0	0	0.00038	0.00015	0	0	0	0	0	0	0	0	0	0	0	0	0	0	0	0	1e-05	0	0	1e-05	0	0.00025	0.00066	0	0	0	0	0	0	0	0	2e-05	0
d__Bacteria	p__Firmicutes	c__Erysipelotrichia	o__Erysipelotrichales	f__Erysipelotrichaceae	g__Dielma	s__unclassified	Dielma unclassified	0	0	0	0	0	0	0	0	0	0	0	0	0	0	0	0	0	0	0	0	0	0	0	0	0	0	0	0	0	0	0	0	0	0	0	0	0	0	0	0	0	0
d__Bacteria	p__Firmicutes	c__Erysipelotrichia	o__Erysipelotrichales	f__Erysipelotrichaceae	g__Dielma	s__fastidiosa	Dielma fastidiosa	0	0	0	0.0151	0	0.0002	0	0.00013	0	0.01425	0.00669	0.00392	0.00204	0.00208	0.00211	0.00643	0.02838	0	0	0	0	0	0	0	0.00016	0	0.00014	0.00015	0.00019	0.00024	0.00163	0.00186	0	0	0	0	0	0	0	0	0	0
d__Bacteria	p__Firmicutes	c__Erysipelotrichia	o__Erysipelotrichales	f__Erysipelotrichaceae	g__Eggerthia	s__catenaformis	Eggerthia catenaformis	0	0	0	0	0	0	0	0	0	0	0	0	0	0	0	0	0	0	0	0	0	0	0	0	0	0	0	0	0	0	0	0	0	0	0	0	0	0	0	0	0	1e-05
d__Bacteria	p__Firmicutes	c__Erysipelotrichia	o__Erysipelotrichales	f__Erysipelotrichaceae	g__Erysipelatoclostridium	s__unclassified	Erysipelatoclostridium unclassified	0	0	0	0	0	0	0	0	0	0	0	0	0	0	0	0	0	0	0	0	0	0	0	0	0	0	0	0	0	0	0	0	0	0	0	0	0	0	0	0	0.0001	6e-05
d__Bacteria	p__Firmicutes	c__Erysipelotrichia	o__Erysipelotrichales	f__Erysipelotrichaceae	g__Erysipelatoclostridium	s__ramosum	Erysipelatoclostridium ramosum	0	0	0	0	0	0	0	1e-05	1e-05	0	0	0	0	0	0	0	0	2e-05	0	1e-05	0	0	0	0	0	0	0	0	0	0	3e-05	0.00016	0	0.00012	0.00011	0.00017	0.0001	3e-05	1e-05	0	0.00025	0.00012
d__Bacteria	p__Firmicutes	c__Erysipelotrichia	o__Erysipelotrichales	f__Erysipelotrichaceae	g__Erysipelotrichaceae_UCG-003	s__unclassified	Erysipelotrichaceae_UCG-003 unclassified	0.00018	0.00034	0.00021	0	0	0	0	0	0.00017	0	0	0	0	0	1e-05	7e-05	0	0	0	0	0	0	0	0	1e-05	0	0	0	0	0	0	2e-05	0	0	0	0	0	0	0	0	0.00893	0.01119
d__Bacteria	p__Firmicutes	c__Erysipelotrichia	o__Erysipelotrichales	f__Erysipelotrichaceae	g__Erysipelotrichaceae_UCG-006	s__unclassified	Erysipelotrichaceae_UCG-006 unclassified	0	0	0	0	0	0	0	0	0	0	0	0	0	0	0	0	0	0	0	0	0	0	0	0	0	0	0	0	0	0	0	0	0	0	0	0	0	0	0	0	0.00016	1e-05
d__Bacteria	p__Firmicutes	c__Erysipelotrichia	o__Erysipelotrichales	f__Erysipelotrichaceae	g__Faecalitalea	s__cylindroides	Faecalitalea cylindroides	1e-05	1e-05	0	0	0	0	0	0	0	0	0	0	0	0	0	0	0	0	0	0	0	0	0	0	0	0	0	0	0	0	0	0	0	0	0	0	0	0	0	0	9e-05	4e-05
d__Bacteria	p__Firmicutes	c__Erysipelotrichia	o__Erysipelotrichales	f__Erysipelotrichaceae	g__Holdemanella	s__unclassified	Holdemanella unclassified	0	6e-05	5e-05	0	0	0	0	0	0	0	0	0	0	0	0	0	0	0	0	0	0	0	0	0	0	0	0	0	0	0	0	0	0	0	0	0	0	0	0	0	2e-05	0.00211
d__Bacteria	p__Firmicutes	c__Erysipelotrichia	o__Erysipelotrichales	f__Erysipelotrichaceae	g__Holdemanella	s__biformis	Holdemanella biformis	0.00013	0.0001	4e-05	0	0	0	0	0	0	0	0	0	0	0	0	0	0	0	1e-05	0	0	0	0	0	0	0	0	0	0	0	0	0	0	0	0	0	0	0	0	0	0.00885	0.00366
d__Bacteria	p__Firmicutes	c__Erysipelotrichia	o__Erysipelotrichales	f__Erysipelotrichaceae	g__Holdemania	s__unclassified_92% / massiliensis_7%	Holdemania unclassified	0	0	0	0	0.00045	0	1e-05	0	3e-05	2e-05	0	0	0	0	0	0	0	0	0	0	0	0	0	0	0	0	0	0	0	0	0	0	0	0	0	0	0	0	0	0	0	0
d__Bacteria	p__Firmicutes	c__Erysipelotrichia	o__Erysipelotrichales	f__Erysipelotrichaceae	g__Holdemania	s__filiformis	Holdemania filiformis	0	0	0	0.00235	0	0.00013	0.07812	0.00406	0.00044	0.00185	0.00126	0.00152	0.00161	0.0007	0.00097	0.00029	0.00338	0.04721	0.04177	0.01537	0.00624	0.0064	0.00485	0.00188	0.00064	0.00064	0.00066	0.00095	0.00073	0.00209	0.00175	0.00032	0.02627	0.02964	0.03185	0.02739	0.02161	0.01905	0.00843	0.00266	0.00047	0
d__Bacteria	p__Firmicutes	c__Erysipelotrichia	o__Erysipelotrichales	f__Erysipelotrichaceae	g__Holdemania	s__massiliensis	Holdemania massiliensis	0	0	0	0	0	0	0	0	1e-05	0	0	0	0	0	0	0	0	0	0	0	0	0	0	0	0	0	0	0	0	0	0	0	0	0	0	1e-05	0	0	0	0	0	0
d__Bacteria	p__Firmicutes	c__Erysipelotrichia	o__Erysipelotrichales	f__Erysipelotrichaceae	g__Solobacterium	s__unclassified	Solobacterium unclassified	0.00057	0.00103	0	4e-05	0	0.00031	0.00095	0.01723	0.00501	2e-05	0	4e-05	0	2e-05	2e-05	7e-05	0.00014	0.00084	0.00053	0.0001	2e-05	0	8e-05	2e-05	7e-05	3e-05	0.0001	2e-05	6e-05	0.00021	0.00014	0.00025	0.00037	0.0006	0.00032	0.0001	3e-05	0	0	0	0.00837	0.00096
d__Bacteria	p__Firmicutes	c__Erysipelotrichia	o__Erysipelotrichales	f__Erysipelotrichaceae	g__Solobacterium	s__moorei	Solobacterium moorei	0	0	0	0	0	0	0	0	0	0	0	0	0	0	0	0	0	0	0	0	0	0	0	0	0	0	0	0	0	0	0	0	0	0	0	0	0	0	0	0	2e-05	1e-05
d__Bacteria	p__Firmicutes	c__Erysipelotrichia	o__Erysipelotrichales	f__Erysipelotrichaceae	g__Turicibacter	s__unclassified	Turicibacter unclassified	0	0	0	0	0	0	0	0	0	0	0	0	0	0	0	0	0	0	0	0	0	0	0	0	0	0	0	0	0	0	0	0	0	0	0	0	0	0	0	0	0	1e-05
d__Bacteria	p__Firmicutes	c__Erysipelotrichia	o__Erysipelotrichales	f__Erysipelotrichaceae	g__Turicibacter	s__sanguinis	Turicibacter sanguinis	0	1e-05	0	0	0	0	0	0	0	0	0	0	0	0	0	0	0	0	0	0	0	0	0	0	0	0	0	0	0	0	0	0	0	0	0	0	0	0	0	0	5e-05	2e-05
d__Bacteria	p__Firmicutes	c__Negativicutes	o__Selenomonadales	f__Acidaminococcaceae	g__Succiniclasticum		X-unclassified	0	0	0	0	0	0	0	0	0	0	0	0	0	0	0	0	0	0	0	0	0	0	0	0	0	0	0	0	0	0	0	0	0	0	0	0	0	0	0	0	0	0.00035
d__Bacteria	p__Firmicutes	c__Negativicutes	o__Selenomonadales	f__Acidaminococcaceae	g__Phascolarctobacterium	s__unclassified	Phascolarctobacterium unclassified	0	0	0	0	0	0	0	0	0	0	0	0	0	0	0	0	0	0	0	0	0	0	0	0	0	0	0	0	0	0	0	0	0	0	0	0	0	0	0	0	1e-05	0.00037
d__Bacteria	p__Firmicutes	c__Negativicutes	o__Selenomonadales	f__Acidaminococcaceae	g__Phascolarctobacterium	s__succinatutens	Phascolarctobacterium succinatutens	0	1e-05	0	0	0	0	0	0	0	0	0	0	0	0	0	0	0	0	0	0	0	0	0	0	0	0	0	0	0	0	0	0	0	0	0	0	0	0	0	0	0.00433	0.00058
d__Bacteria	p__Firmicutes	c__Negativicutes	o__Selenomonadales	f__Acidaminococcaceae	g__Succiniclasticum	s__unclassified	Succiniclasticum unclassified	0	0	0	0	0	0	0	0	0	0	0	0	0	0	0	0	0	0	0	1e-05	1e-05	0	0	0	0	0	0	0	0	0	0	0	0	0	0	0	0	0	1e-05	0	0	0
d__Bacteria	p__Firmicutes	c__Negativicutes	o__Selenomonadales	f__Veillonellaceae	g__unclassified_74% / Megamonas_25%		X-unclassified	2e-05	2e-05	4e-05	0	0	0	0	0	0	0	0	0	0	0	0	0	0	1e-05	0	2e-05	1e-05	0	4e-05	0	0	0	0	0	0	0	0	0	0	0	0	0	0	1e-05	0	0	0.00854	0.00153
d__Bacteria	p__Firmicutes	c__Negativicutes	o__Selenomonadales	f__Veillonellaceae	g__Dialister	s__unclassified	Dialister unclassified	3e-05	2e-05	0	0	0	0	0	0	0	0	0	0	0	0	0	0	0	0	0	0	0	0	0	0	0	0	0	0	0	0	0	0	0	0	0	0	0	0	0	0	0.00659	0.00135
d__Bacteria	p__Firmicutes	c__Negativicutes	o__Selenomonadales	f__Veillonellaceae	g__Dialister	s__invisus	Dialister invisus	0	2e-05	0	0	0	0	0	0	0	0	0	0	0	0	0	0	0	0	0	0	0	0	0	0	0	0	0	0	0	0	0	0	0	0	0	0	0	0	0	0	0.00553	0.00097
d__Bacteria	p__Firmicutes	c__Negativicutes	o__Selenomonadales	f__Veillonellaceae	g__Veillonella	s__unclassified_55% / dispar_32% / atypica_10% / parvula_1%	Veillonella unclassified	0	2e-05	0	0	0	0	0	0	0	0	0	0	0	0	0	0	0	0	0	0	0	0	0	0	0	0	0	0	0	0	0	0	0	0	0	0	0	0	0	0	4e-05	0.00016
d__Bacteria	p__Firmicutes	c__Negativicutes	o__Selenomonadales	f__Veillonellaceae	g__Veillonella	s__atypica	Veillonella atypica	0	0	0	0	0	0	0	0	0	0	0	0	0	0	0	0	0	0	0	0	0	0	0	0	0	0	0	0	0	0	0	0	0	0	0	0	0	0	0	0	0.0002	0
d__Bacteria	p__Firmicutes	c__Negativicutes	o__Selenomonadales	f__Veillonellaceae	g__Veillonella	s__parvula	Veillonella parvula	0	0	0	0	0	0	0	0	0	0	0	0	0	0	0	0	0	0	0	0	0	0	0	0	0	0	0	0	0	0	0	0	0	0	0	0	0	0	0	0	0.0004	0
d__Bacteria	p__Firmicutes	c__Negativicutes	o__Selenomonadales	f__Veillonellaceae	g__Veillonella	s__rodentium	Veillonella rodentium	0	0	0	0	0	0	0	0	0	0	0	0	0	0	0	0	0	0	0	0	0	0	0	0	0	0	0	0	0	0	0	0	1e-05	0	0	0	0	0	0	0	0	0
d__Bacteria	p__Firmicutes	c__Negativicutes	o__Selenomonadales	f__Veillonellaceae	g__Veillonella	s__rogosae	Veillonella rogosae	0	0	0	0	0	0	0	0	0	0	0	0	0	0	0	0	0	0	0	0	0	0	0	0	0	0	0	0	0	0	0	0	0	0	0	0	0	0	0	0	2e-05	0
d__Bacteria	p__Fusobacteria	c__Fusobacteriia	o__Fusobacteriales	f__CFT112H7	g__unclassified		X-unclassified	0	0	0	0	0	0	0	0	0	0	0	0	0	0	0	0	0	0	0	0	0	0	0	0	0	0	0	0	0	0	0	0	0	0	0	0	0	0	0	0	0	0
d__Bacteria	p__Fusobacteria	c__Fusobacteriia	o__Fusobacteriales	f__Fusobacteriaceae	g__Fusobacterium	s__necrophorum	Fusobacterium necrophorum	0	0	0	0	0	0	0	0	0	0	0	0	0	0	0	0	0	0	0	0	0	0	0	0	0	0	0	0	0	0	0	0	0	0	0	0	0	0	0	0	0	0
d__Bacteria	p__Lentisphaerae	c__Lentisphaeria	o__Victivallales	f__Victivallaceae	g__Victivallis	s__unclassified	Victivallis unclassified	0	0	0	0	1e-05	0	0	0	0	0	0	0	0	0	0	0	0	0	0	0	0	0	0	0	0	0	0	0	0	0	0	0	0	0	0	0	0	0	0	0	1e-05	0
d__Bacteria	p__Lentisphaerae	c__Lentisphaeria	o__Victivallales	f__Victivallaceae	g__Victivallis	s__vadensis	Victivallis vadensis	0	0	0	0	0	1e-05	0	0	0	0	0	0	5e-05	0	0	0	0	0	0	0	0	0	0	0	0	0	0	0	0	0	0	0	0	0	0	0	0	0	0	0	0	1e-05
d__Bacteria	p__Proteobacteria	c__Deltaproteobacteria					X-unclassified	0	1e-05	0	0	0	0	0	0	0	0	0	0	0	0	0	0	0	0	0	0	0	0	0	0	0	0	0	0	0	0	0	0	0	0	0	0	0	0	0	0	0	0
d__Bacteria	p__Proteobacteria	c__Alphaproteobacteria	o__Rickettsiales				X-unclassified	0	0	0	0	0	0	0	0	0	0	0	0	0	0	0	0	0	0	0	0	0	0	0	0	0	0	0	0	0	0	0	0	0	0	0	0	0	0	0	0	0	0
d__Bacteria	p__Proteobacteria	c__Alphaproteobacteria	o__Rhizobiales	f__Phyllobacteriaceae	g__Phyllobacterium	s__unclassified	Phyllobacterium unclassified	0	0	0	0	0	0	0	0	0	0	0	0	0	0	0	0	0	0	0	0	0	0	0	0	0	0	0	0	0	0	0	0	0	0	0	0	0	0	0	0	0	0
d__Bacteria	p__Proteobacteria	c__Alphaproteobacteria	o__Rhizobiales	f__Rhizobiaceae	g__Rhizobium	s__etli_30% / leguminosarum_30% / rhizogenes_15% / tropici_15% / tumefaciens_5% / peli_1% / undicola_1%	Rhizobium unclassified	0	0	0	0	0	0	0	0	0	0	1e-05	1e-05	2e-05	2e-05	0	0	0	2e-05	0	0	0	0	0	0	0	0	1e-05	3e-05	3e-05	0	2e-05	0	0	0	0	2e-05	6e-05	2e-05	0	0	0	0
d__Bacteria	p__Proteobacteria	c__Alphaproteobacteria	o__Rhizobiales	f__Rhizobiaceae	g__Rhizobium	s__japonicum	Rhizobium japonicum	0	0	0	0	0	0	0	0	0	0	0	0	0	0	0	0	0	0	0	0	0	0	0	0	0	0	0	0	0	0	0	0	0	0	0	0	0	0	0	0	0	0
d__Bacteria	p__Proteobacteria	c__Alphaproteobacteria	o__Rhodobacterales	f__Rhodobacteraceae	g__Oceanicola	s__granulosus	Oceanicola granulosus	0	0	0	0	0	0	0	0	0	0	0	0	0	0	0	0	0	0	0	0	0	0	0	0	0	0	0	0	0	0	0	0	0	0	0	0	0	0	0	0	0	0
d__Bacteria	p__Proteobacteria	c__Alphaproteobacteria	o__Rhodospirillales	f__Rhodospirillaceae	g__Thalassospira	s__unclassified	Thalassospira unclassified	0	0	0	0	0	0	0	0	0	0	0	0.00022	0.00601	0.01379	0.00312	0.00081	0.00094	0	0	0	0.00037	0.00086	0.01647	0.01861	0	0	0	0	0	0	0	0	0	0	0	0	0	0	0	0	0.0002	0
d__Bacteria	p__Proteobacteria	c__Alphaproteobacteria	o__Rickettsiales	f__Mitochondria	g__Fragaria_50% / Rubus_50%		X-unclassified	0	0	0	0	0	0	0	0	0	0	0	0	0	0	0	0	0	0	0	0	0	0	0	0	0	0	0	0	0	0	0	0	0	0	0	0	0	0	0	0	0	6e-05
d__Bacteria	p__Proteobacteria	c__Alphaproteobacteria	o__Rickettsiales	f__Mitochondria	g__Morus	s__notabilis	Morus notabilis	0	0	0	0	0	0	0	0	0	0	0	0	0	0	0	0	0	0	0	0	0	0	0	0	0	0	0	0	0	0	0	0	0	0	0	0	0	0	0	0	1e-05	0
d__Bacteria	p__Proteobacteria	c__Alphaproteobacteria	o__Sphingomonadales	f__Sphingomonadaceae	g__Novosphingobium	s__unclassified	Novosphingobium unclassified	0	0	0	0	0	0	0	0	0	0	0	0	0	0	0	0	0	0	0	0	0	0	0	0	0	0	0	0	0	0	0	0	0	0	0	0	0	0	0	0	0	1e-05
d__Bacteria	p__Proteobacteria	c__Betaproteobacteria	o__Burkholderiales	f__Oxalobacteraceae			X-unclassified	0	0	0	0	0	0	0	0	0	0	0	0	0	0	0	0	0	0	0	0	0	0	0	0	0	0	0	0	0	0	0	0	0	0	0	0	0	0	0	0	0	0
d__Bacteria	p__Proteobacteria	c__Betaproteobacteria	o__Burkholderiales	f__Alcaligenaceae	g__Parasutterella	s__unclassified	Parasutterella unclassified	0	0	0	0	0.00106	0	0	0	0	0	0	0	0	0	0	0	0	0	0	0	0	0	0	0	0	0	0	0	0	0	0	0	0	0	0	0	0	0	0	0	0	0
d__Bacteria	p__Proteobacteria	c__Betaproteobacteria	o__Burkholderiales	f__Alcaligenaceae	g__Parasutterella	s__excrementihominis	Parasutterella excrementihominis	1e-05	0	0	0	4e-05	0	0	1e-05	0	0	0	0	0	0	0	0	0	0	0	0	0	0	0	0	0	0	0	0	0	0	0	0	0	0	0	0	0	0	0	0	0.00013	4e-05
d__Bacteria	p__Proteobacteria	c__Betaproteobacteria	o__Burkholderiales	f__Alcaligenaceae	g__Sutterella	s__unclassified_97% / stercoricanis_1% / wadsworthensis_1%	Sutterella unclassified	0	0	1e-05	1e-05	0	1e-05	0	4e-05	4e-05	0	0	0	0	0	0	0	0	0	0	0	0	0	0	0	0	0	1e-05	0	5e-05	0	0	0	0	0	0	0	0	0	0	0	5e-05	6e-05
d__Bacteria	p__Proteobacteria	c__Betaproteobacteria	o__Burkholderiales	f__Alcaligenaceae	g__Sutterella	s__wadsworthensis	Sutterella wadsworthensis	6e-05	0	0	0	0	0.01726	0	0.01395	0.03208	0	0	0	0.00028	0	0	0	0	0	0	0	0	0	0	0	0.02289	0.03004	0.01664	0.01617	0.03231	0.00735	0.00142	0.02465	0	0	0	0	0	0	0	0	0.00016	0.00014
d__Bacteria	p__Proteobacteria	c__Betaproteobacteria	o__Burkholderiales	f__Burkholderiaceae	g__Burkholderia	s__cepacia_36% / pseudomallei_24% / cenocepacia_9% / stabilis_4% / thailandensis_4% / ubonensis_4% / glumae_3% / pyrrocinia_3% / vietnamiensis_2% / ambifaria_2% / arboris_1% / mallei_1%	Burkholderia unclassified	0	0	0	0	0	0	0	0	1e-05	0	0	0	0	0	0	0	0	0	0	0	0	0	0	0	0	0	0	0	0	0	0	0	0	0	0	0	0	0	0	0	0	1e-05
d__Bacteria	p__Proteobacteria	c__Betaproteobacteria	o__Burkholderiales	f__Burkholderiaceae	g__Burkholderia	s__pseudomallei	Burkholderia pseudomallei	0	0	0	0	0	0	0	0	0	0	0	0	0	0	0	0	0	0	0	0	0	0	0	0	0	0	0	0	0	0	0	0	0	0	0	0	0	0	0	0	0	0
d__Bacteria	p__Proteobacteria	c__Betaproteobacteria	o__Burkholderiales	f__Burkholderiaceae	g__Lautropia	s__mirabilis	Lautropia mirabilis	0	0	0	0	0	0	0	0	0	0	0	0	0	0	0	0	0	0	0	0	0	0	0	0	0	0	0	0	0	0	0	0	0	0	0	0	0	0	0	2e-05	0	0
d__Bacteria	p__Proteobacteria	c__Betaproteobacteria	o__Burkholderiales	f__Burkholderiaceae	g__Polynucleobacter	s__necessarius	Polynucleobacter necessarius	1e-05	0	0	0	0	0	0	0	0	0	0	0	0	0	0	0	0	0	0	0	0	0	0	0	0	0	0	0	0	0	0	0	0	0	0	0	0	0	0	0	0	0
d__Bacteria	p__Proteobacteria	c__Betaproteobacteria	o__Burkholderiales	f__Comamonadaceae	g__Albidiferax_42% / unclassified_30% / Chlorochromatium_8% / Variovorax_6% / Curvibacter_5% / Macromonas_2% / Methylibium_1%		X-unclassified	0	0	0	0	0	0	0	0	0	0	0	0	0	0	0	0	0	0	0	0	0	0	0	0	0	0	0	0	0	0	0	0	0	0	0	0	0	0	0	0	0	1e-05
d__Bacteria	p__Proteobacteria	c__Betaproteobacteria	o__Burkholderiales	f__Comamonadaceae	g__Acidovorax	s__unclassified_69% / facilis_26% / defluvii_3% / temperans_1%	Acidovorax unclassified	0	0	0	0	0	0	0	0	0	0	0	0	0	0	0	0	0	0	0	0	0	0	0	0	0	0	0	0	0	0	0	0	0	0	0	0	0	0	0	0	0	0
d__Bacteria	p__Proteobacteria	c__Betaproteobacteria	o__Burkholderiales	f__Comamonadaceae	g__Comamonas	s__unclassified_33% / aquatica_19% / testosteroni_18% / jiangduensis_12% / kerstersii_12% / denitrificans_2%	Comamonas unclassified	0	0	0	0	0	0	0	0	0	0	0	0	0	0	0	0	0	0	0	0	0	0	0	0	0	0	0	0	0	0	0	0	0	0	0	0	0	0	0	0	0	0
d__Bacteria	p__Proteobacteria	c__Betaproteobacteria	o__Burkholderiales	f__Comamonadaceae	g__Simplicispira	s__metamorpha	Simplicispira metamorpha	0	0	0	0	0	0	0	0	0	0	0	0	0	0	0	0	0	0	0	0	0	0	0	0	0	0	0	0	0	0	0	0	0	0	0	0	0	0	0	0	0	0
d__Bacteria	p__Proteobacteria	c__Betaproteobacteria	o__Burkholderiales	f__Oxalobacteraceae	g__unclassified_50% / Massilia_50%		X-unclassified	0	0	0	0	0	0	0	0	0	0	0	0	0	0	0	0	0	0	0	0	0	0	0	0	0	0	0	0	0	0	0	0	0	0	0	0	0	0	0	0	0	0
d__Bacteria	p__Proteobacteria	c__Betaproteobacteria	o__Burkholderiales	f__Oxalobacteraceae	g__Oxalobacter	s__unclassified	Oxalobacter unclassified	0	0	0	0	0	0	0	0	0	0	0	0	0	0	0	0	0	0	0	0	0	0	0	0	0	0	0	0	0	0	0	0	0	0	0	0	0	0	0	0	9e-05	0
d__Bacteria	p__Proteobacteria	c__Betaproteobacteria	o__Burkholderiales	f__Oxalobacteraceae	g__Oxalobacter	s__formigenes	Oxalobacter formigenes	0	0	0	0	0	0	0	0	0	0	0	0	0	0	0	0	0	0	0	0	0	0	0	0	1e-05	0	1e-05	0	0	0	0	0	0	0	0	0	0	0	0	0	4e-05	4e-05
d__Bacteria	p__Proteobacteria	c__Betaproteobacteria	o__Rhodocyclales	f__Rhodocyclaceae	g__12up	s__unclassified	12up unclassified	0	0	0	0	0	0	0	0	0	0	0	0	0	0	0	0	0	0	0	0	0	0	0	0	0	0	0	0	0	0	0	0	0	0	0	0	0	0	0	0	0	0
d__Bacteria	p__Proteobacteria	c__Betaproteobacteria	o__Rhodocyclales	f__Rhodocyclaceae	g__Zoogloea	s__oleivorans	Zoogloea oleivorans	0	0	0	0	0.00075	0	0	0	0	0	0	0	0	0	0	0	0	0	0	0	0	0	0	0	0	0	0	0	0	0	0	0	0	0	0	0	0	0	0	0	0	0
d__Bacteria	p__Proteobacteria	c__Deltaproteobacteria	o__Desulfovibrionales	f__Desulfovibrionaceae	g__Bilophila	s__unclassified	Bilophila unclassified	0	0	0	0	0.00032	0.00031	0	0	0	0	0	0	0	0	0	0	0	0	0	0	0	0	0	0	0	0	0	0	0	0	0	0	0	0	0	0	0	0	0	0	0	0
d__Bacteria	p__Proteobacteria	c__Deltaproteobacteria	o__Desulfovibrionales	f__Desulfovibrionaceae	g__Bilophila	s__wadsworthia	Bilophila wadsworthia	0	0	0	0.00124	0	0.00036	0	0	0	0.00138	0.00101	0.00058	0.00027	8e-05	0	7e-05	0	0	0	0	0	0	0	0	0	0	0	0	0	0	0	0	0	0	0	0	0	0	0	0	0.0002	6e-05
d__Bacteria	p__Proteobacteria	c__Deltaproteobacteria	o__Desulfovibrionales	f__Desulfovibrionaceae	g__Desulfovibrio	s__unclassified	Desulfovibrio unclassified	0	0	0	0	0	0.00389	0	0	0	0	0	0	0	0	0	0	0	0	0	1e-05	0	0	0	0	0	0	0	0	0	0	0	0	0	0	0	0	0	0	0	0	0.00018	0.00023
d__Bacteria	p__Proteobacteria	c__Deltaproteobacteria	o__Desulfovibrionales	f__Desulfovibrionaceae	g__Desulfovibrio	s__desulfuricans	Desulfovibrio desulfuricans	0	0	0	0	0	0	0	0	0	0	0	0	0	0	0	0	0	0	0	0	0	0	0	0	0	0	0	0	0	0	0	0	0	0	0	0	0	0	0	0	0	0
d__Bacteria	p__Proteobacteria	c__Deltaproteobacteria	o__Desulfovibrionales	f__Desulfovibrionaceae	g__Desulfovibrio	s__piger	Desulfovibrio piger	0	0	0	0	0	0.00011	0	0	0	0	0	0	0	0	0	0	0	0	0	0	0	0	0	0	0	0	0	0	0	0	0	0	0	0	0	0	0	0	0	0	4e-05	8e-05
d__Bacteria	p__Proteobacteria	c__Epsilonproteobacteria	o__Campylobacterales	f__Campylobacteraceae	g__Arcobacter	s__unclassified	Arcobacter unclassified	0	0	0	0	0	0	0	0	0	0	0	0	0	0	0	0	0	0	0	0	0	0	0	0	0	0	0	0	0	0	0	0	0	0	0	0	0	0	0	0	0	0
d__Bacteria	p__Proteobacteria	c__Gammaproteobacteria	o__B38_97% / Pseudomonadales_1%				X-unclassified	0	0	0	1e-05	0	0	3e-05	0	0	0	0	0	0	0	5e-05	0	0.00039	0.00013	5e-05	0	0	0	0	0	0	0	0	0	0	0	0	0.00015	0	0	0	2e-05	0	0.0001	4e-05	0	0	0
d__Bacteria	p__Proteobacteria	c__Gammaproteobacteria	o__Aeromonadales	f__Aeromonadaceae	g__Aeromonas_90% / Tolumonas_9%		X-unclassified	5e-05	0	0	0	0	0	0	0	0	0	0	0	0	0	0	0	0	0	0	0	0	0	0	0	0	0	0	0	0	0	0	0	0	0	0	0	0	0	0	0	0	0
d__Bacteria	p__Proteobacteria	c__Gammaproteobacteria	o__Aeromonadales	f__Aeromonadaceae	g__Aeromonas	s__unclassified_70% / schubertii_11% / hydrophila_4% / veronii_4% / caviae_2% / media_2% / salmonicida_1%	Aeromonas unclassified	0	0	0	0	0	0	0	0	0	0	0	0	0	0	0	0	0	0	0	0	0	0	0	0	0	0	0	0	0	0	0	0	0	0	0	0	0	0	0	0	0	0
d__Bacteria	p__Proteobacteria	c__Gammaproteobacteria	o__Aeromonadales	f__Aeromonadaceae	g__Aeromonas	s__caviae	Aeromonas caviae	0	0	0	0	0	0	0	0	0	0	0	0	0	0	0	0	0	0	0	0	0	0	0	0	0	0	0	0	0	0	0	0	0	0	0	0	0	0	0	0	0	0
d__Bacteria	p__Proteobacteria	c__Gammaproteobacteria	o__Aeromonadales	f__Aeromonadaceae	g__Aeromonas	s__dhakensis	Aeromonas dhakensis	0	0	0	0	0	0	0	0	0	0	0	0	0	0	0	0	0	0	0	0	0	0	0	0	0	0	0	0	0	0	0	0	0	0	0	0	0	0	0	0	0	1e-05
d__Bacteria	p__Proteobacteria	c__Gammaproteobacteria	o__Aeromonadales	f__Aeromonadaceae	g__Aeromonas	s__salmonicida	Aeromonas salmonicida	0	0	0	0	5e-05	0	0	0	0	0	0	0	0	0	0	0	0	0	0	0	0	0	0	0	0	0	0	0	0	0	0	0	0	0	0	0	0	0	0	0	0	0
d__Bacteria	p__Proteobacteria	c__Gammaproteobacteria	o__Aeromonadales	f__Aeromonadaceae	g__Aeromonas	s__veronii	Aeromonas veronii	0	0	0	0	0	0	0	0	0	0	0	0	0	0	0	0	0	0	0	0	0	0	0	0	0	0	0	0	0	0	0	0	0	0	0	0	0	0	0	0	0	0
d__Bacteria	p__Proteobacteria	c__Gammaproteobacteria	o__Aeromonadales	f__Succinivibrionaceae	g__Succinatimonas	s__hippei	Succinatimonas hippei	0	0	0	0	0	0	0	0	0	0	0	0	0	0	0	0	0	0	0	0	0	0	0	0	0	0	0	0	0	0	0	0	0	0	0	0	0	0	0	0	0	0
d__Bacteria	p__Proteobacteria	c__Gammaproteobacteria	o__Alteromonadales	f__Colwelliaceae	g__unclassified		X-unclassified	0	0	0	0	0	0	0	0	0	0	0	0	0	0	0	0	0	0	0	0	0	0	0	0	0	0	0	0	0	0	0	0	0	0	0	0	0	0	0	0	0	0
d__Bacteria	p__Proteobacteria	c__Gammaproteobacteria	o__Alteromonadales	f__Shewanellaceae	g__Shewanella	s__unclassified_96% / putrefaciens_3%	Shewanella unclassified	0	0	0	0	0	0	0	0	0	0	0	0	0	0	0	0	0	0	0	0	0	0	0	0	0	0	0	0	0	0	0	0	0	0	0	0	0	0	0	0	0	0
d__Bacteria	p__Proteobacteria	c__Gammaproteobacteria	o__B38	f__unclassified			X-unclassified	0.00196	0.00502	0.00867	0	0	5e-05	0	9e-05	0.00026	0	0	0	0	0	0	0	0	0	0	0	0	0	0	0	0	0	0	0	0.0001	0	0.00027	0	5e-05	0.00015	0	0	4e-05	0	0	0	0	0
d__Bacteria	p__Proteobacteria	c__Gammaproteobacteria	o__Enterobacteriales	f__Enterobacteriaceae	g__Klebsiella_21% / Raoultella_19% / Cronobacter_17% / Enterobacter_17% / Erwinia_8% / Pantoea_5% / Salmonella_3% / Kluyvera_2% / Aquamonas_1%		X-unclassified	1e-05	0.0001	0.00022	0.0001	0	0	0	0.00023	1e-05	0.00424	0	2e-05	0.00028	0	0	0.00014	0	4e-05	0.00025	1e-05	0	3e-05	0	5e-05	0	0.00146	0	0.00013	0.00196	0	0	0.00018	2e-05	0.00024	3e-05	6e-05	1e-05	1e-05	2e-05	4e-05	0	0
d__Bacteria	p__Proteobacteria	c__Gammaproteobacteria	o__Enterobacteriales	f__Enterobacteriaceae	g__Aquamonas	s__haywardensis	Aquamonas haywardensis	0	0	0	0	0	0	0	0	0	0	0	0	0	0	0	0	0	0	0	0	0	0	0	0	0	0	0	0	0	0	0	0	0	0	0	0	0	0	0	0	0	0
d__Bacteria	p__Proteobacteria	c__Gammaproteobacteria	o__Enterobacteriales	f__Enterobacteriaceae	g__Buttiauxella	s__dalhousiensis	Buttiauxella dalhousiensis	0.05026	0	0	0	0.00018	0	0	0	0	0	0	0	0	0	0	0	0	0	0	0	0	0	0	0	0	0	0	0	0	0	0	0	0	0	0	0	0	0	0	0	0	0
d__Bacteria	p__Proteobacteria	c__Gammaproteobacteria	o__Enterobacteriales	f__Enterobacteriaceae	g__Buttiauxella	s__noackiae	Buttiauxella noackiae	0.00011	0	0	0	0	0	0	0	0	0	0	0	0	0	0	0	0	0	0	0	0	0	0	0	0	0	0	0	0	0	0	0	0	0	0	0	0	0	0	0	0	0
d__Bacteria	p__Proteobacteria	c__Gammaproteobacteria	o__Enterobacteriales	f__Enterobacteriaceae	g__Buttiauxella	s__warmboldiae	Buttiauxella warmboldiae	0.04814	0.04285	0	0	0	0.00502	0	0	0	0	0	0	0	0	0	0	0	0	0	0	0	0	0	0	0	0	0	0	0	0	0	0	0	0	0	0	0	0	0	0	0	0
d__Bacteria	p__Proteobacteria	c__Gammaproteobacteria	o__Enterobacteriales	f__Enterobacteriaceae	g__Cedecea	s__neteri_59% / davisae_30% / lapagei_9%	Cedecea unclassified	6e-05	0	0	0	0	0	0	0	0	0	0	0	0	0	0	0	0	0	0	0	0	0	0	0	0	0	0	0	0	0	0	0	0	0	0	0	0	0	0	0	0	0
d__Bacteria	p__Proteobacteria	c__Gammaproteobacteria	o__Enterobacteriales	f__Enterobacteriaceae	g__Citrobacter	s__freundii_31% / unclassified_19% / calcoaceticus_10% / sedlakii_9% / pneumoniae_8% / coli_4% / amalonaticus_4% / murliniae_3% / farmeri_3% / lignolyticus_2%	Citrobacter unclassified	0.00045	4e-05	0	0	0	0	0	0.00012	0	0	0	2e-05	0	0	0	0	0	0.00025	4e-05	1e-05	0	2e-05	0	1e-05	4e-05	0.00018	9e-05	6e-05	9e-05	9e-05	0	0.00026	4e-05	3e-05	3e-05	1e-05	0	0	1e-05	0	0	0
d__Bacteria	p__Proteobacteria	c__Gammaproteobacteria	o__Enterobacteriales	f__Enterobacteriaceae	g__Citrobacter	s__amalonaticus	Citrobacter amalonaticus	0	0	0	0	0	0	0	0	0	0	0	0	0	0	0	0	0	0	0	0	0	0	0	0	0	0	0	0	0	0	0	0	0	0	0	0	0	0	0	0	0	0
d__Bacteria	p__Proteobacteria	c__Gammaproteobacteria	o__Enterobacteriales	f__Enterobacteriaceae	g__Citrobacter	s__cloacae	Citrobacter cloacae	0.0004	0	0	0	0	0	0	0	0	0	0	0	0	0	0	0	0	0	0	0	0	0	0	0	0	0	0	0	0	0	0	0	0	0	0	0	0	0	0	0	0	0
d__Bacteria	p__Proteobacteria	c__Gammaproteobacteria	o__Enterobacteriales	f__Enterobacteriaceae	g__Citrobacter	s__farmeri	Citrobacter farmeri	7e-05	0	0.00028	0	0	0	0	0	0	0	0	0	0	0	0	0	0	0	0	0	0	0	0	0	7e-05	0	5e-05	9e-05	5e-05	0	6e-05	0	0	0	0	0	0	0	0	0	0	0
d__Bacteria	p__Proteobacteria	c__Gammaproteobacteria	o__Enterobacteriales	f__Enterobacteriaceae	g__Citrobacter	s__flexneri	Citrobacter flexneri	0	0	0	0	0	0	0	0.00239	0	0	0	0	0	0	0	0	0	0	0	0	0	0	0	0	0	0	0	0	0	0	0	0	0	0	0	0	0	0	0	0	0	0
d__Bacteria	p__Proteobacteria	c__Gammaproteobacteria	o__Enterobacteriales	f__Enterobacteriaceae	g__Citrobacter	s__freundii	Citrobacter freundii	0	0	0	0.00489	0	0.00095	0.00086	0.00024	3e-05	0.00302	0.00356	0.00294	0.00404	0.00281	0.00972	0.00192	0.00971	0	0.00044	0.00093	0.00168	0.00242	0.00168	0.00131	0.01118	0.0091	0.01133	0.01546	0.02108	0.01921	0.00569	0.02505	0.01588	0.01058	0.00814	0.00504	0.0074	0.00291	0.00358	0.00553	0	0
d__Bacteria	p__Proteobacteria	c__Gammaproteobacteria	o__Enterobacteriales	f__Enterobacteriaceae	g__Citrobacter	s__gillenii	Citrobacter gillenii	0	0	0	0	0	0	0	0.00131	0	0	0	0	0	0	0	0	0	0	0	0	0	0	0	0	0	0	0	0	0	0	0	0	0	0	0	0	0	0	0	0	0	0
d__Bacteria	p__Proteobacteria	c__Gammaproteobacteria	o__Enterobacteriales	f__Enterobacteriaceae	g__Citrobacter	s__lignolyticus	Citrobacter lignolyticus	0	0	0	0	0	0	0	0	0	0	0	0	0	0	0	0	0	0	0	0	0	0	0	0	0	3e-05	0	0	0.00016	0	0	0	0	9e-05	0	0	0	0	0	0	0	0
d__Bacteria	p__Proteobacteria	c__Gammaproteobacteria	o__Enterobacteriales	f__Enterobacteriaceae	g__Citrobacter	s__oxytoca	Citrobacter oxytoca	0	0	0	0	0	0	0	0	0	0	0	0	0	0	0	0	0	0	0	0	0	0	0	0	0	0	0	0	0	0	0	0	0	0	0	0	0	0	0	0	0	0
d__Bacteria	p__Proteobacteria	c__Gammaproteobacteria	o__Enterobacteriales	f__Enterobacteriaceae	g__Citrobacter	s__sedlakii	Citrobacter sedlakii	0	0	0	0	0	0	0	0	0	0	0	0	0	0	0	0	0	0	0	0	0	0	0	0	7e-05	0	0.0001	0	0	0	0	6e-05	0	0	0	0	0	0	0	0	0	0
d__Bacteria	p__Proteobacteria	c__Gammaproteobacteria	o__Enterobacteriales	f__Enterobacteriaceae	g__Citrobacter	s__terrigena	Citrobacter terrigena	0	0	0	0	0	0	0	0	0	0	0	0	0	0	0	0	0	0	0	0	0	0	0	0	0	0	0	0	0	0	0	0	0	0	0	0	0	0	0	0	0	0
d__Bacteria	p__Proteobacteria	c__Gammaproteobacteria	o__Enterobacteriales	f__Enterobacteriaceae	g__Citrobacter	s__werkmanii	Citrobacter werkmanii	0	0	0	0	0	0	0	0	0	0	0	0	0	0	0	0	0	0	0	0	0	0	0	0	0	0	0	0	0	0	0	5e-05	0	0	0	0	0	0	0	0	0	0
d__Bacteria	p__Proteobacteria	c__Gammaproteobacteria	o__Enterobacteriales	f__Enterobacteriaceae	g__Cronobacter	s__unclassified_38% / sakazakii_17% / pneumoniae_14% / turicensis_10% / dublinensis_5% / youngae_3% / muytjensii_3% / planticola_2%	Cronobacter unclassified	0.00018	1e-05	9e-05	0	0	0	0.00042	0	4e-05	0	0	0	0	0	0.0001	0	0	0	0	0	0	0	0	0	0	0	1e-05	0	0	1e-05	0	6e-05	0.00022	0	0.00013	0	4e-05	0	0	0	0	0
d__Bacteria	p__Proteobacteria	c__Gammaproteobacteria	o__Enterobacteriales	f__Enterobacteriaceae	g__Cronobacter	s__coagulans	Cronobacter coagulans	0	0	0	0	0	0	0	0	0	0	0	0	0	0	0	0	0	0	0	0	0	0	0	0	0	0	0	0	0	0	0	0	0	0	0	0	0	0	0	0	0	0
d__Bacteria	p__Proteobacteria	c__Gammaproteobacteria	o__Enterobacteriales	f__Enterobacteriaceae	g__Cronobacter	s__dublinensis	Cronobacter dublinensis	0	0	0	0	0	0	0	0	0	0	0	0	0	0	0	0	0	0	0	0	0	0	0	0	0	0	0	0	0	7e-05	0	7e-05	8e-05	0	1e-05	0	0.00018	0	0	0	0	0
d__Bacteria	p__Proteobacteria	c__Gammaproteobacteria	o__Enterobacteriales	f__Enterobacteriaceae	g__Cronobacter	s__flexneri	Cronobacter flexneri	0	0	0	0	0	0	0	0	0	0	0	0	0	0	0	0	0	0	0	0	0	0	0	0	0	0	0	0	0	0	0	5e-05	0	0	0	0	0	0	0	0	0	0
d__Bacteria	p__Proteobacteria	c__Gammaproteobacteria	o__Enterobacteriales	f__Enterobacteriaceae	g__Cronobacter	s__malonaticus	Cronobacter malonaticus	0	0	0	0	0	0	0	0	0	0	0	0	0	0	0	0	0	0	0	0	0	0	0	0	0	0	0	0	0	0	0	0	0	0	1e-05	0	0	0	0	0	0	0
d__Bacteria	p__Proteobacteria	c__Gammaproteobacteria	o__Enterobacteriales	f__Enterobacteriaceae	g__Cronobacter	s__muytjensii	Cronobacter muytjensii	0	8e-05	0	0	0.0001	0	0	0	0	0	0	0	0	0	0	0	0	0	0	0	0	0	0	0	0	0	0	0	0	0	0	0	0	0	0	0	0	0	0	0	0	0
d__Bacteria	p__Proteobacteria	c__Gammaproteobacteria	o__Enterobacteriales	f__Enterobacteriaceae	g__Cronobacter	s__planticola	Cronobacter planticola	0.00084	0.0014	0	0	0	0	0	0.00027	1e-05	0	0	0	0	0	0	0	0	0	0	0	0	0	0	0	0	0	0	0	0	0	0	0	0	0	0	0	0	0	0	0	0	0
d__Bacteria	p__Proteobacteria	c__Gammaproteobacteria	o__Enterobacteriales	f__Enterobacteriaceae	g__Cronobacter	s__pneumoniae	Cronobacter pneumoniae	0.00018	0.00046	0	0	0	0	0	0	0	0	0	0	0	0	0	0	0	0	0	0	0	0	0	0	0	0	0	0	0	0	0	0	0	0	0	0	0	0	0	0	0	0
d__Bacteria	p__Proteobacteria	c__Gammaproteobacteria	o__Enterobacteriales	f__Enterobacteriaceae	g__Cronobacter	s__sakazakii	Cronobacter sakazakii	0	0	0	0	0	0	0	0	0	0	0	0	0	0	0	0	0	0	0	0	0	0	0	0	0	0	0	0	0	0	0	0	0	0	0	0	0	0	0	0	0	0
d__Bacteria	p__Proteobacteria	c__Gammaproteobacteria	o__Enterobacteriales	f__Enterobacteriaceae	g__Enterobacter	s__pneumoniae_63% / cloacae_19% / oxytoca_7% / unclassified_3% / asburiae_1% / hormaechei_1%	Enterobacter unclassified	0.0024	0.00079	0.00132	0.00152	0	0.00068	0.01706	0.00024	0.00026	0	0.00079	0.0014	0.00036	0.00017	0.00032	0	0.00037	0	0.0124	0.00081	0.00068	0	0	0.00046	0.00394	0	0.00191	0.00099	0	0.0012	0.00038	0.00198	0.00047	0.00208	0.00601	0	0.00196	0.0004	0	0.00079	0	0
d__Bacteria	p__Proteobacteria	c__Gammaproteobacteria	o__Enterobacteriales	f__Enterobacteriaceae	g__Enterobacter	s__adecarboxylata	Enterobacter adecarboxylata	0.00082	0.00066	0	0	0	1e-05	0	0	0	0	0	0	0	0	0	0	0	0	0	0	0	0	0	0	0	0	0	0	0	0	0	0	0	0	0	0	0	0	0	0	0	0
d__Bacteria	p__Proteobacteria	c__Gammaproteobacteria	o__Enterobacteriales	f__Enterobacteriaceae	g__Enterobacter	s__aerogenes	Enterobacter aerogenes	0	0	0.00117	0	0	0	0	0	0	0	0	0	0	0	0	0	0	0	0	0	0	0	0	0	3e-05	0	0	0	0	0	0	0.0001	0	0	0	0	0	0	0	0	0	0
d__Bacteria	p__Proteobacteria	c__Gammaproteobacteria	o__Enterobacteriales	f__Enterobacteriaceae	g__Enterobacter	s__agglomerans	Enterobacter agglomerans	0.02712	0.01194	0	0	0.00018	0	0	0	0.00015	0	0	0	0	0	0	0	0	0	0	0	0	0	0	0	0	0	0	0	0	0	0	0	0	0	0	0	0	0	0	0	0	0
d__Bacteria	p__Proteobacteria	c__Gammaproteobacteria	o__Enterobacteriales	f__Enterobacteriaceae	g__Enterobacter	s__amnigena	Enterobacter amnigena	0.00031	8e-05	0	0	0.00217	0	0	0	0.00029	0	0	0	0	0	0	0	0	0	0	0	0	0	0	0	0	0	0	0	0	0	0	0	0	0	0	0	0	0	0	0	0	0
d__Bacteria	p__Proteobacteria	c__Gammaproteobacteria	o__Enterobacteriales	f__Enterobacteriaceae	g__Enterobacter	s__asburiae	Enterobacter asburiae	0.00075	0.00505	0.00221	0	0	0	0	0	0	0	0	0	0	0	0	0	0	0	0	0	0	0	0	0	0	0	0	0	0	0	0	0	0	0	0	0	0	0	0	0	0	0
d__Bacteria	p__Proteobacteria	c__Gammaproteobacteria	o__Enterobacteriales	f__Enterobacteriaceae	g__Enterobacter	s__cancerogenus	Enterobacter cancerogenus	0.00024	0.00017	0	0	0.00014	1e-05	0	0	0	0	0	0	0	0	0	0	0	0	0	0	0	0	0	0	0	0	0	0	0	0	0	0	0	0	0	0	0	0	0	0	0	0
d__Bacteria	p__Proteobacteria	c__Gammaproteobacteria	o__Enterobacteriales	f__Enterobacteriaceae	g__Enterobacter	s__cloacae	Enterobacter cloacae	0.00726	0.00498	0	0.0048	0	0.00026	0.01603	0	0.00406	0	0.00071	0	0	0	0.00044	0	0.00064	0.00495	0	0.00879	0.00981	0.01563	0.01323	0.01122	0	0	0	0.00118	0	0	0	0.00042	0.00582	0	0	0.00064	0	0	0.00066	0.00048	0	0
d__Bacteria	p__Proteobacteria	c__Gammaproteobacteria	o__Enterobacteriales	f__Enterobacteriaceae	g__Enterobacter	s__cowanii	Enterobacter cowanii	0.00015	4e-05	0	0	0	0	0	0	0	0	0	0	0	0	0	0	0	0	0	0	0	0	0	0	0	0	0	0	0	0	0	0	0	0	0	0	0	0	0	0	0	0
d__Bacteria	p__Proteobacteria	c__Gammaproteobacteria	o__Enterobacteriales	f__Enterobacteriaceae	g__Enterobacter	s__dispersa	Enterobacter dispersa	0	0	0	0	0	0	0	0	0	0	0	0	0	0	0	0	0	0	0	0	0	0	0	0	0	0	0	0	0	0	0	0	0	0	0	0	0	0	0	0	0	0
d__Bacteria	p__Proteobacteria	c__Gammaproteobacteria	o__Enterobacteriales	f__Enterobacteriaceae	g__Enterobacter	s__endophytica	Enterobacter endophytica	0	0.00011	0	0	0	0	0	0	0	0	0	0	0	0	0	0	0	0	0	0	0	0	0	0	0	0	0	0	0	0	0	0	0	0	0	0	0	0	0	0	0	0
d__Bacteria	p__Proteobacteria	c__Gammaproteobacteria	o__Enterobacteriales	f__Enterobacteriaceae	g__Enterobacter	s__freundii	Enterobacter freundii	0	1e-05	0	0	0	0	0	0	0	0	0	0	0	0	0	0	0	0	0	0	0	0	0	0	0	0	0	0	0	0	0	0	0	0	0	0	0	0	0	0	0	0
d__Bacteria	p__Proteobacteria	c__Gammaproteobacteria	o__Enterobacteriales	f__Enterobacteriaceae	g__Enterobacter	s__galili	Enterobacter galili	0	0	0	0	0	0	0	0	0	0	0	0	0	0	0	0	0	0	0	0	0	0	0	0	0	0	0	0	0	0	0	0	0	0	0	0	0	0	0	0	0	0
d__Bacteria	p__Proteobacteria	c__Gammaproteobacteria	o__Enterobacteriales	f__Enterobacteriaceae	g__Enterobacter	s__gergoviae	Enterobacter gergoviae	0	0	0	0	0	0	0	0	0	0	0	0	0	0	0	0	0	0	0	0	0	0	0	0	0	0	0	0	0	0	0	0	0	1e-05	0	0	1e-05	0	0	0	0	0
d__Bacteria	p__Proteobacteria	c__Gammaproteobacteria	o__Enterobacteriales	f__Enterobacteriaceae	g__Enterobacter	s__hormaechei	Enterobacter hormaechei	0.00731	0	0	0	0	0.0003	0	0.00387	0.00128	0	0.00029	0	0.00058	0	0.00063	0	0.00044	0	0	0	0	0	0.0001	5e-05	0	0	0	0	0	0.00047	6e-05	0	0.00076	0.00063	0	0.0003	0.0002	0.00013	8e-05	0	0	0
d__Bacteria	p__Proteobacteria	c__Gammaproteobacteria	o__Enterobacteriales	f__Enterobacteriaceae	g__Enterobacter	s__ludwigii	Enterobacter ludwigii	3e-05	1e-05	0	0	0	0	0	0	0	0	0	0	0	0	0	0	0	0	0	0	0	0	0	0	0	0	0	0	0	0	0	0	0	0	0	0	0	0	0	0	0	0
d__Bacteria	p__Proteobacteria	c__Gammaproteobacteria	o__Enterobacteriales	f__Enterobacteriaceae	g__Enterobacter	s__mori	Enterobacter mori	0	0	0	0	0	0	0	0	0	0	0	0	0	0	0	0	0	0	0	0	0	0	0	0	0	0	0	0	0	0	0	0	0	0	0	0	0	0	0	0	0	0
d__Bacteria	p__Proteobacteria	c__Gammaproteobacteria	o__Enterobacteriales	f__Enterobacteriaceae	g__Enterobacter	s__nickellidurans	Enterobacter nickellidurans	0	0	0	0	0	0	0	0	0	0	0	0	0	0	0	0	0	0	0	0	0	0	0	0	0	0	0	0	0	0	0	0	0	0	0	0	0	0	0	0	0	0
d__Bacteria	p__Proteobacteria	c__Gammaproteobacteria	o__Enterobacteriales	f__Enterobacteriaceae	g__Enterobacter	s__oxytoca	Enterobacter oxytoca	0.00011	8e-05	0	0	0	0	0.00044	0.01264	6e-05	0	0	0	0	0	0	0	0	0	0	0	0	0	0	0	0	0	5e-05	0.0001	0	3e-05	3e-05	0.0002	0.00023	0.0001	0.00082	0.00061	0.00034	7e-05	0.00025	0.00011	0	0
d__Bacteria	p__Proteobacteria	c__Gammaproteobacteria	o__Enterobacteriales	f__Enterobacteriaceae	g__Enterobacter	s__plantisponsor	Enterobacter plantisponsor	0	1e-05	0	0	0	0	0	0	0	0	0	0	0	0	0	0	0	0	0	0	0	0	0	0	0	0	0	0	0	0	0	0	0	0	0	0	0	0	0	0	0	0
d__Bacteria	p__Proteobacteria	c__Gammaproteobacteria	o__Enterobacteriales	f__Enterobacteriaceae	g__Enterobacter	s__pneumoniae	Enterobacter pneumoniae	1e-05	0	0	0	0	0	0	0	0	0	0	0	0	0	0	0	0	0	0	0	0	0.00047	0	0	0	0	0	0	0	0.00022	0	0	0	0.00248	0	0.00104	0	0	0	0	0	0
d__Bacteria	p__Proteobacteria	c__Gammaproteobacteria	o__Enterobacteriales	f__Enterobacteriaceae	g__Enterobacter	s__pyrinus	Enterobacter pyrinus	0	0.00091	0	0	0	0	0	0	0	0	0	0	0	0	0	0	0	0	0	0	0	0	0	0	0	0	0	0	0	0	0	0	0	0	0	0	0	0	0	0	0	0
d__Bacteria	p__Proteobacteria	c__Gammaproteobacteria	o__Enterobacteriales	f__Enterobacteriaceae	g__Enterobacter	s__sakazakii	Enterobacter sakazakii	0	0	0	0	0	0	0	0	0	0	0	0	0	0	0	0	0	0	0	0	0	0	0	0	0	0	0	0	0	0	0	0	0	0	0	0	0	0	0	0	0	0
d__Bacteria	p__Proteobacteria	c__Gammaproteobacteria	o__Enterobacteriales	f__Enterobacteriaceae	g__Enterobacter	s__senegalensis	Enterobacter senegalensis	0	0	0	0	0	0	0	0	0	0	0	0	0	0	0	0	0	0	0	0	0	0	0	0	0	0	0	0	0	0	0	0	0	0	0	0	0	0	0	0	0	0
d__Bacteria	p__Proteobacteria	c__Gammaproteobacteria	o__Enterobacteriales	f__Enterobacteriaceae	g__Enterobacter	s__soli	Enterobacter soli	0	0.00022	0	0	0	0	0	0	0	0	0	0	0	0	0	0	0	0	0	0	0	0	0	0	0	0	0	0	0	0	0	0	0	0	0	0	0	0	0	0	0	0
d__Bacteria	p__Proteobacteria	c__Gammaproteobacteria	o__Enterobacteriales	f__Enterobacteriaceae	g__Enterobacter	s__ureilytica	Enterobacter ureilytica	0	0	8e-05	0	0	0	0	0	0	0	0	0	0	0	0	0	0	0	0	0	0	0	0	0	0	0	0	0	0	0	0	0	0	0	0	0	0	0	0	0	0	0
d__Bacteria	p__Proteobacteria	c__Gammaproteobacteria	o__Enterobacteriales	f__Enterobacteriaceae	g__Enterobacter	s__variicola	Enterobacter variicola	0	0	0	0	0	0	6e-05	0	0	0	0	0	0	0	0	0	0	0	1e-05	0	0	0	0	0	0.00012	0	0	0	0	0	1e-05	0	0	0	0	0	0	0	0	0	0	0
d__Bacteria	p__Proteobacteria	c__Gammaproteobacteria	o__Enterobacteriales	f__Enterobacteriaceae	g__Enterobacter	s__youngae	Enterobacter youngae	0	6e-05	0	0	0	0	0	0	0	0	0	0	0	0	0	0	0	0	0	0	0	0	0	0	0	0	0	0	0	0	0	0	0	0	0	0	0	0	0	0	0	0
d__Bacteria	p__Proteobacteria	c__Gammaproteobacteria	o__Enterobacteriales	f__Enterobacteriaceae	g__Erwinia	s__tasmaniensis_50% / amylovora_14% / unclassified_11% / pyrifoliae_11% / aphidicola_4% / occidentalis_2% / persicina_2% / piriflorinigrans_1%	Erwinia unclassified	0.00015	0.00027	0	0	0	0	0	0	0	0	0	0	0	0	0	0	0	0	0	0	0	0	0	0	1e-05	0.0009	1e-05	0	0	0	0	0	0	0	0	0	0	0	0	0	0	0
d__Bacteria	p__Proteobacteria	c__Gammaproteobacteria	o__Enterobacteriales	f__Enterobacteriaceae	g__Erwinia	s__agglomerans	Erwinia agglomerans	2e-05	0.00073	0	0	0	0	0	0	0	0	0	0	0	0	0	0	0	0	0	0	0	0	0	0	0	0	0	0	0	0	0	0	0	0	0	0	0	0	0	0	0	0
d__Bacteria	p__Proteobacteria	c__Gammaproteobacteria	o__Enterobacteriales	f__Enterobacteriaceae	g__Erwinia	s__pyrifoliae	Erwinia pyrifoliae	0.00285	0	0	0	2e-05	0	0	0	0	0	0	0	0	0	0	0	0	0	0	0	0	0	0	0	0	0	0	0	0	0	0	0	0	0	0	0	0	0	0	0	0	0
d__Bacteria	p__Proteobacteria	c__Gammaproteobacteria	o__Enterobacteriales	f__Enterobacteriaceae	g__Escherichia-Shigella	s__unclassified_89% / coli_4% / flexneri_2% / enterica_1%	Escherichia-Shigella unclassified	0.01939	0.01657	0.01366	0.00012	0	0	0.00032	0.00044	0.00047	0	0	0	0	0.00011	0	0.01896	0.00012	0	4e-05	0	0.00021	0	0	9e-05	9e-05	0.00044	0.00031	0.00019	0.00041	0.00065	6e-05	0.00042	0.00037	5e-05	0.00016	0	4e-05	6e-05	2e-05	0.00018	0	0
d__Bacteria	p__Proteobacteria	c__Gammaproteobacteria	o__Enterobacteriales	f__Enterobacteriaceae	g__Escherichia-Shigella	s__albertii	Escherichia-Shigella albertii	0	0	0	0	0	0	0	0	0	0	0	0	0	0	0	0	0	0	0	0	0	0	0	0	0	0	0	0	0	0	0	0	0	0	0	0	0	0	0	0	0	0
d__Bacteria	p__Proteobacteria	c__Gammaproteobacteria	o__Enterobacteriales	f__Enterobacteriaceae	g__Escherichia-Shigella	s__boydii	Escherichia-Shigella boydii	0	0	0	0	0	0	0	0	0	0	0	0	0	0	0	0.0185	0	0	0	0	0	0	0	0	0	0	0	0	0	0	0	0	0	0	0	0	0	0	0	0	0	0
d__Bacteria	p__Proteobacteria	c__Gammaproteobacteria	o__Enterobacteriales	f__Enterobacteriaceae	g__Escherichia-Shigella	s__carotovorum	Escherichia-Shigella carotovorum	0	0.00057	0	0	0.00629	0	0	0	0	0	0	0	0	0	0	0	0	0	0	0	0	0	0	0	0	0	0	0	0	0	0	0	0	0	0	0	0	0	0	0	0	0
d__Bacteria	p__Proteobacteria	c__Gammaproteobacteria	o__Enterobacteriales	f__Enterobacteriaceae	g__Escherichia-Shigella	s__coli	Escherichia-Shigella coli	0.65951	0.39278	0.35051	0.03083	0	0.00152	0.12157	0.06267	0.04207	0.02568	0.0271	0.03145	0.04771	0.06298	0.08399	0	0.10243	0.12367	0.08892	0.06483	0.04557	0.04885	0.04223	0.05022	0.03893	0.03769	0.04864	0.05372	0.08269	0.12136	0.08556	0.12517	0.15215	0.14626	0.11921	0.10887	0.10858	0.09426	0.07418	0.0581	0.0007	0
d__Bacteria	p__Proteobacteria	c__Gammaproteobacteria	o__Enterobacteriales	f__Enterobacteriaceae	g__Escherichia-Shigella	s__enterica	Escherichia-Shigella enterica	0	0	0	0	0	0	0.00043	0	0	0	0	0	0	0	0	0	0	0.00018	0.00022	0.00036	0.00011	0.00034	0.00012	0.00021	0	0	0	0	0	0	0	0	0.00011	0.00012	8e-05	0	0	0	5e-05	0	0	0
d__Bacteria	p__Proteobacteria	c__Gammaproteobacteria	o__Enterobacteriales	f__Enterobacteriaceae	g__Escherichia-Shigella	s__glacialis	Escherichia-Shigella glacialis	0.00036	0.00018	0	0	0	0	0	0	0	0	0	0	0	0	0	0	0	0	0	0	0	0	0	0	0	0	0	0	0	0	0	0	0	0	0	0	0	0	0	0	0	0
d__Bacteria	p__Proteobacteria	c__Gammaproteobacteria	o__Enterobacteriales	f__Enterobacteriaceae	g__Escherichia-Shigella	s__hormaechei	Escherichia-Shigella hormaechei	0	0	0	0	0	0	0	0	0	0	0	0	0	0	0	0	0	0	0	0	0	0	0	0	0	0	0	0	0	0	0	0	0	0	0	0	0	0	0	0	0	0
d__Bacteria	p__Proteobacteria	c__Gammaproteobacteria	o__Enterobacteriales	f__Enterobacteriaceae	g__Escherichia-Shigella	s__koseri	Escherichia-Shigella koseri	0	0	0	0	0	0	0	0	0	0	0	0	0	0	0	0	0	0	0	0	0	0	0	0	0	0	0	0	0	0	0	0	0.00013	0	0	0	0	0	0	0	0	0
d__Bacteria	p__Proteobacteria	c__Gammaproteobacteria	o__Enterobacteriales	f__Enterobacteriaceae	g__Escherichia-Shigella	s__psidii	Escherichia-Shigella psidii	0	0.00059	0	0	0	0	0	0	0	0	0	0	0	0	0	0	0	0	0	0	0	0	0	0	0	0	0	0	0	0	0	0	0	0	0	0	0	0	0	0	0	0
d__Bacteria	p__Proteobacteria	c__Gammaproteobacteria	o__Enterobacteriales	f__Enterobacteriaceae	g__Escherichia-Shigella	s__rhapontici	Escherichia-Shigella rhapontici	0.00101	0	0	0	0	0	0	0	0	0	0	0	0	0	0	0	0	0	0	0	0	0	0	0	0	0	0	0	0	0	0	0	0	0	0	0	0	0	0	0	0	0
d__Bacteria	p__Proteobacteria	c__Gammaproteobacteria	o__Enterobacteriales	f__Enterobacteriaceae	g__Escherichia-Shigella	s__sonnei	Escherichia-Shigella sonnei	0	0	0	0	1e-05	0	0	0	0	0	0	0	0	0	0	0	0	0	0	0	0	0	0	0	0	0	0	0	0	0	0	0	0	0	0	0	0	0	0	0	0	0
d__Bacteria	p__Proteobacteria	c__Gammaproteobacteria	o__Enterobacteriales	f__Enterobacteriaceae	g__Escherichia-Shigella	s__tamarense	Escherichia-Shigella tamarense	0	0	0	0	3e-05	0	0	0	0	0	0	0	0	0	0	0	0	0	0	0	0	0	0	0	0	0	0	0	0	0	0	0	0	0	0	0	0	0	0	0	0	0
d__Bacteria	p__Proteobacteria	c__Gammaproteobacteria	o__Enterobacteriales	f__Enterobacteriaceae	g__Klebsiella	s__ornithinolytica_66% / cloacae_18% / pneumoniae_10% / oxytoca_3%	Klebsiella unclassified	8e-05	0	0.00018	0	0	5e-05	0.00022	0	0.00064	0	0	0	0	6e-05	0	0	0	0.00171	0	0	0	0	0	0	0	0	6e-05	0	0	0	0	0	0	0	0	0	0	0	0	0	0	0
d__Bacteria	p__Proteobacteria	c__Gammaproteobacteria	o__Enterobacteriales	f__Enterobacteriaceae	g__Klebsiella	s__aerogenes	Klebsiella aerogenes	0.00067	9e-05	9e-05	0	0	0	0	0	0	0	0	0	0	0	0	0	0	0	0	0	0	0	0	0	0	0	0	0	0	0	0	0	0	0	0	0	0	0	0	0	0	0
d__Bacteria	p__Proteobacteria	c__Gammaproteobacteria	o__Enterobacteriales	f__Enterobacteriaceae	g__Klebsiella	s__cloacae	Klebsiella cloacae	0.00073	0.00074	0	0	0	0	0	0	0	0	0	0	0	0	0	0	0	0	0	0	0	0	0	0	0	0	0	0	0	0	0	0	0	0	0	0	0	0	0	0	0	0
d__Bacteria	p__Proteobacteria	c__Gammaproteobacteria	o__Enterobacteriales	f__Enterobacteriaceae	g__Klebsiella	s__granulomatis	Klebsiella granulomatis	0	0	0	0	0	0	9e-05	0	0	0	0	0	0	0	0	0	0	2e-05	0	0	0	0	0	0	0	0	0	0	0	0	0	0	0	0	0	0	0	0	0	0	0	0
d__Bacteria	p__Proteobacteria	c__Gammaproteobacteria	o__Enterobacteriales	f__Enterobacteriaceae	g__Klebsiella	s__oxytoca	Klebsiella oxytoca	0	0	0	0	0	0	0	0	0	0	0	0	0	0	0	0	0	0	0	0	0	0	0	0	0	0	0	0	0	0	0	0	0	0	0	0	0	0	0	0	0	0
d__Bacteria	p__Proteobacteria	c__Gammaproteobacteria	o__Enterobacteriales	f__Enterobacteriaceae	g__Klebsiella	s__pneumoniae	Klebsiella pneumoniae	0.00014	1e-05	0	0.00372	0.00134	0.00011	0	0	3e-05	0	0	0	0	8e-05	0	0	0	0	0	0	0	0	0.00065	0	0	0	0.00041	0	0	0	0	0	0.00519	0	0	0	0	0.0005	0.00062	0	0	0
d__Bacteria	p__Proteobacteria	c__Gammaproteobacteria	o__Enterobacteriales	f__Enterobacteriaceae	g__Klebsiella	s__variicola	Klebsiella variicola	0.0028	0.00019	0.00073	0	0	0	0	0	0	0	0	0	0	0	0	0	0	0	0	0	0	0	0	0	0	0	0	0	0	0	0	0	0	0	0	0	0	0	0	0	0	0
d__Bacteria	p__Proteobacteria	c__Gammaproteobacteria	o__Enterobacteriales	f__Enterobacteriaceae	g__Kluyvera	s__georgiana_97% / cloacae_1% / terrigena_1%	Kluyvera unclassified	6e-05	0	0.00031	0	0	0	0	0	0.00056	0	0	0	0	0	0	0	0	1e-05	0	0	0	0	0	0	0	0.00016	0	0	0	0	0	0	2e-05	0	0	0	0	0	0	0	0	0
d__Bacteria	p__Proteobacteria	c__Gammaproteobacteria	o__Enterobacteriales	f__Enterobacteriaceae	g__Kluyvera	s__amnigena	Kluyvera amnigena	2e-05	0	0.00011	0	0.00018	0	0	0	0	0	0	0	0	0	0	0	0	0	0	0	0	0	0	0	0	0	0	0	0	0	0	0	0	0	0	0	0	0	0	0	0	0
d__Bacteria	p__Proteobacteria	c__Gammaproteobacteria	o__Enterobacteriales	f__Enterobacteriaceae	g__Kluyvera	s__ascorbata	Kluyvera ascorbata	0.05077	0.0007	0.01063	0	0	0.00267	0.00014	0	0	0	0	0	0	0	0	0	0	0	0	0	0	0	0	0	0	0.00022	0	0	0	0	0	0	9e-05	0	0	0	0	0	0	0	0	0
d__Bacteria	p__Proteobacteria	c__Gammaproteobacteria	o__Enterobacteriales	f__Enterobacteriaceae	g__Kluyvera	s__cryocrescens	Kluyvera cryocrescens	1e-05	0	0.00083	0	0	0	0	0	0	0	0	0	0	0	0	0	0	0	0	0	0	0	0	0	0	0	0	0	0	0	0	0	0	0	0	0	0	0	0	0	0	0
d__Bacteria	p__Proteobacteria	c__Gammaproteobacteria	o__Enterobacteriales	f__Enterobacteriaceae	g__Kluyvera	s__ferragutiae	Kluyvera ferragutiae	0	0	0	0	0	0	0	0	0	0	0	0	0	0	0	0	0	0	0	0	0	0	0	0	0	0	0	0	0	0	0	0	0	0	0	0	0	0	0	0	0	0
d__Bacteria	p__Proteobacteria	c__Gammaproteobacteria	o__Enterobacteriales	f__Enterobacteriaceae	g__Kluyvera	s__georgiana	Kluyvera georgiana	0	0	0	0	0	0	0	0	0	0	0	0	0	0	0	0.00022	0	0	0	0	0	0	0	0	0	0	0	0	0	0.00019	0	0	0	0	0	0	0	1e-05	0	0	0	0
d__Bacteria	p__Proteobacteria	c__Gammaproteobacteria	o__Enterobacteriales	f__Enterobacteriaceae	g__Morganella	s__unclassified	Morganella unclassified	0	0	0	0	0	0	0	0	0	0	0	0	0	0	0	0	0	0	0	0	0	0	0	0	0	0	0	0	0	0	0	0	0	0	0	0	0	0	0	0	0	0
d__Bacteria	p__Proteobacteria	c__Gammaproteobacteria	o__Enterobacteriales	f__Enterobacteriaceae	g__Pantoea	s__agglomerans_84% / hormaechei_4% / cloacae_2% / piriflorinigrans_2% / endophytica_2% / adecarboxylata_1% / dispersa_1%	Pantoea unclassified	1e-05	3e-05	5e-05	0	0	0.0011	0	0	0	0	0	0	0	0	0	0	0	0	0	1e-05	0	0	0	0	0	0	0	0	0.00027	0	0	0	0	6e-05	0	0	0	0	0	0	1e-05	0
d__Bacteria	p__Proteobacteria	c__Gammaproteobacteria	o__Enterobacteriales	f__Enterobacteriaceae	g__Pantoea	s__agglomerans	Pantoea agglomerans	0.00055	0.00066	0	0	0	0	0	0	0	0	0	0	0	0	0	0	0	0	0	0	0	0	0	0	0	0	0	0	0	0	0	0	0	0	0	0	0	0	0	0	0	0
d__Bacteria	p__Proteobacteria	c__Gammaproteobacteria	o__Enterobacteriales	f__Enterobacteriaceae	g__Pantoea	s__cancerogenus	Pantoea cancerogenus	0	0	0	0	0	0	0	0	0	0	0	0	0	0	0	0	0	0	0	0	0	0	0	0	0	0	0	0	0	0	0	0	0	0	0	0	0	0	0	0	0	0
d__Bacteria	p__Proteobacteria	c__Gammaproteobacteria	o__Enterobacteriales	f__Enterobacteriaceae	g__Pantoea	s__cloacae	Pantoea cloacae	0	0.00138	0	0	0	0	0	0	0	0	0	0	0	0	0	0	0	0	0	0	0	0	0	0	0	0	0	0	0	0	0	0	0	0	0	0	0	0	0	0	0	0
d__Bacteria	p__Proteobacteria	c__Gammaproteobacteria	o__Enterobacteriales	f__Enterobacteriaceae	g__Pantoea	s__dispersa	Pantoea dispersa	0.00011	0	8e-05	0	0	0	0	0	0	0	0	0	0	0	0	0	0	0	0	0	0	0	0	0	0	0	0	0	0	0	0	0	0	0	0	0	0	0	0	0	0	0
d__Bacteria	p__Proteobacteria	c__Gammaproteobacteria	o__Enterobacteriales	f__Enterobacteriaceae	g__Pantoea	s__freundii	Pantoea freundii	0	0	0	0	0	0.00361	0	0	0	0	0	0	0	0	0	0	0	0	0	0	0	0	0	0	0	0	0	0	1e-05	0	0	0	0	0	0	0	0	0	0	0	0	0
d__Bacteria	p__Proteobacteria	c__Gammaproteobacteria	o__Enterobacteriales	f__Enterobacteriaceae	g__Pantoea	s__oxytoca	Pantoea oxytoca	0	0	0	0	0	0	0.00053	0	0	0	0	0	0	0	0	0	0	0.00016	0	0.0001	0	0	0	0	0	0	0	0	0	0	0	0	0	0.00047	0	0	0	0	0	0	0	0
d__Bacteria	p__Proteobacteria	c__Gammaproteobacteria	o__Enterobacteriales	f__Enterobacteriaceae	g__Pectobacterium	s__carotovorum_61% / cloacae_30% / cypripedii_7%	Pectobacterium unclassified	1e-05	0	0	0	0	0	0	0	0	0	0	0	0	0	0	0	0	0	0	0	0	0	0	0	0	0	0	0	0	0	0	0	0	0	0	0	0	0	0	0	0	0
d__Bacteria	p__Proteobacteria	c__Gammaproteobacteria	o__Enterobacteriales	f__Enterobacteriaceae	g__Pectobacterium	s__cloacae	Pectobacterium cloacae	9e-05	0	0	0	0	0	0	0	0	0	0	0	0	0	0	0	0	0	0	0	0	0	0	0	0	0	0	0	0	0	0	0	0	0	0	0	0	0	0	0	0	0
d__Bacteria	p__Proteobacteria	c__Gammaproteobacteria	o__Enterobacteriales	f__Enterobacteriaceae	g__Pectobacterium	s__cypripedii	Pectobacterium cypripedii	0	0	0	0	0	0	0	0	0	0	0	0	0	0	0	0	0	0	0	0	0	0	0	0	0	0	0	0	0	0	0	0	0	0	0	0	0	0	0	0	0	0
d__Bacteria	p__Proteobacteria	c__Gammaproteobacteria	o__Enterobacteriales	f__Enterobacteriaceae	g__Pectobacterium	s__epidermidis	Pectobacterium epidermidis	0	0	0	0	0	0	0	0	0	0	0	0	0	0	0	0	0	0	0	0	0	0	0	0	0	0	0	0	0	0	0	0	0	0	0	0	0	0	0	0	0	0
d__Bacteria	p__Proteobacteria	c__Gammaproteobacteria	o__Enterobacteriales	f__Enterobacteriaceae	g__Providencia	s__bovienii	Providencia bovienii	0	0.10686	0	0	0	0	0	0	0	0	0	0	0	0	0	0	0	0	0	0	0	0	0	0	0	0	0	0	0	0	0	0	0	0	0	0	0	0	0	0	0	0
d__Bacteria	p__Proteobacteria	c__Gammaproteobacteria	o__Enterobacteriales	f__Enterobacteriaceae	g__Rahnella	s__aerogenes	Rahnella aerogenes	0	0	0	0	0	0	0	0	0.00032	0	0	0	0	0	0	0	0	0	0	0	0	0	0	0	0	0	0	0	0	0	0	0	0	0	0	0	0	0	0	0	0	0
d__Bacteria	p__Proteobacteria	c__Gammaproteobacteria	o__Enterobacteriales	f__Enterobacteriaceae	g__Raoultella	s__ornithinolytica_52% / planticola_26% / unclassified_5% / oxytoca_5% / electrica_5% / terrigena_3%	Raoultella unclassified	9e-05	0	2e-05	0	0	0	0	0	0	0	0	0	0	0	0	0	0	0	0	0	0	0	0	0	0	0	0	0	0	0	0	0	0	0	0	0	0	0	0	0	0	0
d__Bacteria	p__Proteobacteria	c__Gammaproteobacteria	o__Enterobacteriales	f__Enterobacteriaceae	g__Raoultella	s__adecarboxylata	Raoultella adecarboxylata	0	0	0	0	0	0	0	0	0	0	0	0	0	0	0	0	0	0	0	0	0	0	0	0	0	0	0	0	0	0	0	0	0	0	0	0	0	0	0	0	0	0
d__Bacteria	p__Proteobacteria	c__Gammaproteobacteria	o__Enterobacteriales	f__Enterobacteriaceae	g__Raoultella	s__agglomerans	Raoultella agglomerans	0	0	0	0	0	0	0	0	0	0	0	0	0	0	0	0	0	0	0	0	0	0	0	0	0	0	0	0	0	0	0	0	0	0	0	0	0	0	0	0	0	0
d__Bacteria	p__Proteobacteria	c__Gammaproteobacteria	o__Enterobacteriales	f__Enterobacteriaceae	g__Raoultella	s__cryocrescens	Raoultella cryocrescens	0	0	0	0	0	0	0	0	0	0	0	0	0	0	0	0	0	0	0	0	0	0	0	0	1e-05	0	0	0	0	0	0	1e-05	0	0	0	0	0	0	0	0	0	0
d__Bacteria	p__Proteobacteria	c__Gammaproteobacteria	o__Enterobacteriales	f__Enterobacteriaceae	g__Raoultella	s__ornithinolytica	Raoultella ornithinolytica	0	0	0	0	0	0	0	0	0	0	0	0	0	0	0	0	0	0	0	0	0	0	0	0	9e-05	2e-05	0.00018	0.00051	0.00019	9e-05	5e-05	0.00127	0	0	0	2e-05	3e-05	0	4e-05	3e-05	0	0
d__Bacteria	p__Proteobacteria	c__Gammaproteobacteria	o__Enterobacteriales	f__Enterobacteriaceae	g__Salmonella	s__enterica_96% / hermannii_1%	Salmonella unclassified	0	0	0	0	0	0	0	0	9e-05	0	0	0	2e-05	0	0	0	0	0	0	0	0.00016	0	6e-05	0	0	0.00029	0.00048	3e-05	5e-05	0	2e-05	0	0	0	0	0	0	0	0	0	0	0
d__Bacteria	p__Proteobacteria	c__Gammaproteobacteria	o__Enterobacteriales	f__Enterobacteriaceae	g__Salmonella	s__aerogenes	Salmonella aerogenes	0	0	0	0	0	0	0	0	0	0	0	0	1e-05	0	0	0	0	0	0	0	0	0	0	0	0.00026	0	0	0.00047	0	7e-05	0	0	0	0	0	0	0	0	0	0	0	0
d__Bacteria	p__Proteobacteria	c__Gammaproteobacteria	o__Enterobacteriales	f__Enterobacteriaceae	g__Salmonella	s__bongori	Salmonella bongori	0	0	0	0	0	0	0.00025	0	0	0	0	0	0	0	0	0	0	0	0	0	7e-05	0	0.00016	0	0	0	0	0	0	0	0	0	0	0	0	0	0	0	0	0	0	0
d__Bacteria	p__Proteobacteria	c__Gammaproteobacteria	o__Enterobacteriales	f__Enterobacteriaceae	g__Salmonella	s__enterica	Salmonella enterica	0.00026	0	0	0	0	0	0	0	0	0	0	0	0	0	0	0	0	0	0	0	0	0	0	0	0	0	0	0	0	0	0	0	0	0	0	0	0	0	0	0	0	0
d__Bacteria	p__Proteobacteria	c__Gammaproteobacteria	o__Enterobacteriales	f__Enterobacteriaceae	g__Salmonella	s__hermannii	Salmonella hermannii	0	0	0	0	0	0	0	0	0	0	0	0	0	0	0	0	0	0	0	0	0	0	0	0	0	0.00033	0.00021	0	0.00042	0	7e-05	0.00298	0	0	0	0	0	0	0	0	0	0
d__Bacteria	p__Proteobacteria	c__Gammaproteobacteria	o__Enterobacteriales	f__Enterobacteriaceae	g__Salmonella	s__zurichensis	Salmonella zurichensis	0	0	0	0	0	0	0	0	3e-05	0	0	0	0	0	0	0	0	0	0	0	0	0	0	0	0	0	0	0	0	0	0	0	0	0	0	0	0	0	0	0	0	0
d__Bacteria	p__Proteobacteria	c__Gammaproteobacteria	o__Enterobacteriales	f__Enterobacteriaceae	g__Serratia	s__marcescens_98% / unclassified_1%	Serratia unclassified	0.00106	3e-05	0.00012	0	0	0	0	0	0	0	0	0	0	0	0	0	0	0	0	0	0	0	0	0	0	0	0	0	0	0	0	0	0	0	0	0	0	0	0	0	0	0
d__Bacteria	p__Proteobacteria	c__Gammaproteobacteria	o__Enterobacteriales	f__Enterobacteriaceae	g__Serratia	s__nematodiphila	Serratia nematodiphila	0	6e-05	0.00015	0	1e-05	0	0	0	0	0	0	0	0	0	0	0	0	0	0	0	0	0	0	0	0	0	0	0	0	0	0	0	0	0	0	0	0	0	0	0	0	0
d__Bacteria	p__Proteobacteria	c__Gammaproteobacteria	o__Enterobacteriales	f__Enterobacteriaceae	g__Tatumella	s__aerogenes_32% / unclassified_31% / citrea_11% / saanichensis_11% / australoborealis_9% / flectens_2%	Tatumella unclassified	0.0003	0.00111	0.00034	0	1e-05	0	0	0	0.00011	0	0	0	0	0	0	0	0	0	0	0	0	0	0	0	0	0	0	0	0	0	0	0	0	0	0	0	0	0	0	0	0	0
d__Bacteria	p__Proteobacteria	c__Gammaproteobacteria	o__Enterobacteriales	f__Enterobacteriaceae	g__Tatumella	s__aerogenes	Tatumella aerogenes	0	0	0	0	0	0	0	0	1e-05	0	0	0	0	0	0	0	0	0	0	0	0	0	0	0	0	0	0	0	0	0	0	0	0	0	0	0	0	0	0	0	0	0
d__Bacteria	p__Proteobacteria	c__Gammaproteobacteria	o__Enterobacteriales	f__Enterobacteriaceae	g__Tatumella	s__agglomerans	Tatumella agglomerans	0	0	0	0	0	0	0	0	0	0	0	0	0	0	0	0	0	0	0	0	0	0	0	0	0	0	0	0	0	0	0	0	0	0	0	0	0	0	0	0	0	0
d__Bacteria	p__Proteobacteria	c__Gammaproteobacteria	o__Enterobacteriales	f__Enterobacteriaceae	g__Tatumella	s__citrea	Tatumella citrea	1e-05	0	0	0	0	0	0	0	0	0	0	0	0	0	0	0	0	0	0	0	0	0	0	0	0	0	0	0	0	0	0	0	0	0	0	0	0	0	0	0	0	0
d__Bacteria	p__Proteobacteria	c__Gammaproteobacteria	o__Enterobacteriales	f__Enterobacteriaceae	g__Tatumella	s__flectens	Tatumella flectens	0	0	0	0	0	0	0	0	0	0	0	0	0	0	0	0	0	0	0	0	0	0	0	0	0	0	0	0	0	0	0	0	0	0	0	0	0	0	0	0	0	0
d__Bacteria	p__Proteobacteria	c__Gammaproteobacteria	o__Enterobacteriales	f__Enterobacteriaceae	g__Tatumella	s__nectarea	Tatumella nectarea	6e-05	0	0	0	0	0	0	0	0	0	0	0	0	0	0	0	0	0	0	0	0	0	0	0	0	0	0	0	0	0	0	0	0	0	0	0	0	0	0	0	0	0
d__Bacteria	p__Proteobacteria	c__Gammaproteobacteria	o__Enterobacteriales	f__Enterobacteriaceae	g__Trabulsiella	s__unclassified	Trabulsiella unclassified	0	0	0	0	0	1e-05	0	0	0	0	0	0	0	0	0	0	0	0	0	0	0	0	0	0	0	0	0	0	0	0	0	0	0	0	0	0	0	0	0	0	0	0
d__Bacteria	p__Proteobacteria	c__Gammaproteobacteria	o__Enterobacteriales	f__Enterobacteriaceae	g__Yokenella	s__regensburgei	Yokenella regensburgei	0	0	0	0	1e-05	0	0	0	0	0	0	0	0	0	0	0	0	0	0	0	0	0	0	0	0	0	0	0	0	0	0	0	0	0	0	0	0	0	0	0	0	0
d__Bacteria	p__Proteobacteria	c__Gammaproteobacteria	o__Pasteurellales	f__Pasteurellaceae	g__Haemophilus	s__unclassified_98% / sputorum_1%	Haemophilus unclassified	0.00066	5e-05	0	0	0	0	0	0	0	0	0	0	0	0	0	0	0	0	0	0	0	0	0	0	0	0	0	0	0	0	0	0	0	0	0	0	0	0	0	0	0	0
d__Bacteria	p__Proteobacteria	c__Gammaproteobacteria	o__Pasteurellales	f__Pasteurellaceae	g__Haemophilus	s__parainfluenzae	Haemophilus parainfluenzae	0.00479	6e-05	0	0.00021	0	0	1e-05	3e-05	0	0.0001	7e-05	0	0	0	0	0	1e-05	2e-05	0	2e-05	0	0	0	0	0	0	0	0	0	0	0	0	0	0	0	0	0	0	0	0	0.00043	0.0001
d__Bacteria	p__Proteobacteria	c__Gammaproteobacteria	o__Pasteurellales	f__Pasteurellaceae	g__Haemophilus	s__sputorum	Haemophilus sputorum	0	0	0	0	0	0	0	0	0	0	0	0	0	0	0	0	0	0	0	0	0	0	0	0	0	0	0	0	0	0	0	0	0	0	0	0	0	0	0	0	4e-05	0
d__Bacteria	p__Proteobacteria	c__Gammaproteobacteria	o__Pseudomonadales	f__Moraxellaceae	g__Acinetobacter	s__lwoffii	Acinetobacter lwoffii	0	0	0	0	0	0	0	0	0	0	0	0	0	0	0	0	0	0	0	0	0	0	0	0	0	0	0	0	0	0	0	0	0	0	0	0	0	0	0	1e-05	0	0
d__Bacteria	p__Proteobacteria	c__Gammaproteobacteria	o__Pseudomonadales	f__Pseudomonadaceae	g__Pseudomonas	s__unclassified_81% / peli_6% / ludwigii_2% / fluorescens_1% / anguilliseptica_1% / cremoricolorata_1% / pneumoniae_1%	Pseudomonas unclassified	2e-05	1e-05	0	0	0	0	0	0	0	0	0	0	0	0	0	0	0	0	0	0	0	0	0	0	0	0	0	0	0	0	0	0	0	0	0	0	0	0	0	0	0	0.0001
d__Bacteria	p__Proteobacteria	c__Gammaproteobacteria	o__Pseudomonadales	f__Pseudomonadaceae	g__Pseudomonas	s__azotoformans	Pseudomonas azotoformans	4e-05	0	0	0	0	0	0	0	0	0	0	0	0	0	0	0	0	0	0	0	0	0	0	0	0	0	0	0	0	0	0	0	0	0	0	0	0	0	0	0	0	0
d__Bacteria	p__Proteobacteria	c__Gammaproteobacteria	o__Pseudomonadales	f__Pseudomonadaceae	g__Pseudomonas	s__fluorescens	Pseudomonas fluorescens	0	0	0	0	0	0	0	0	0	0	0	0	0	0	0	0	0	0	0	0	0	0	0	0	0	0	0	0	0	0	0	0	0	0	0	0	0	0	0	0	0	0
d__Bacteria	p__Proteobacteria	c__Gammaproteobacteria	o__Pseudomonadales	f__Pseudomonadaceae	g__Pseudomonas	s__ludwigii	Pseudomonas ludwigii	0	0	0.00105	0	0	0	0	0	0	0	0	0	0	0	0	0	0	0	0	0	0	0	0	0	0	0	0	0	0	0	0	0	0	0	0	0	0	0	0	0	0	0
d__Bacteria	p__Proteobacteria	c__Gammaproteobacteria	o__Pseudomonadales	f__Pseudomonadaceae	g__Pseudomonas	s__pneumoniae	Pseudomonas pneumoniae	0.00078	0.00043	0.00283	0	0	0	0	0	0	0	0	0	0	0	0	0	0	0	0	0	0	0	0	0	0	0	0	0	0	0	0	0	0	0	0	0	0	0	0	0	0	0
d__Bacteria	p__Proteobacteria	c__Gammaproteobacteria	o__Pseudomonadales	f__Pseudomonadaceae	g__Pseudomonas	s__rhodesiae	Pseudomonas rhodesiae	0	0	0	0	0	0	0	0	0	0	0	0	0	0	0	0	0	0	0	0	0	0	0	0	0	0	0	0	0	0	0	0	0	0	0	0	0	0	0	0	0	0
d__Bacteria	p__Proteobacteria	c__Gammaproteobacteria	o__Xanthomonadales	f__Xanthomonadaceae	g__Thermomonas	s__hydrothermalis	Thermomonas hydrothermalis	0	0	0	0	0	0	0	0	0	0	0	0	0	0	0	0	0	0	0	0	0	0	0	0	0	0	0	0	0	0	0	0	0	0	0	0	0	0	0	0	0	0
d__Bacteria	p__Proteobacteria	c__Gammaproteobacteria	o__aaa34a10	f__Aeromonadaceae	g__Aeromonas	s__hydrophila	Aeromonas hydrophila	2e-05	0	0	0	0	0	0	0	0	0	0	0	0	0	0	0	0	0	0	0	0	0	0	0	0	0	0	0	0	0	0	0	0	0	0	0	0	0	0	0	0	0
d__Bacteria	p__Saccharibacteria	c__unclassified					X-unclassified	0	0	0	0	0	0	0	0	0	0	0	0	0	0	0	0	0	0	0	0	0	0	0	0	0	0	0	0	0	0	0	0	0	0	0	0	0	0	0	0	4e-05	0
d__Bacteria	p__Spirochaetae	c__Spirochaetes	o__Spirochaetales	f__Spirochaetaceae	g__Treponema_2	s__berlinense	Treponema_2 berlinense	0	0	0	0	0	0	0	0	0	0	0	0	0	0	0	0	0	0	0	0	0	0	0	0	0	0	0	0	0	0	0	0	0	0	0	0	0	0	0	0	1e-05	1e-05
d__Bacteria	p__Tenericutes	c__Mollicutes	o__Anaeroplasmatales	f__Anaeroplasmataceae	g__Anaeroplasma	s__unclassified	Anaeroplasma unclassified	0	0	0	0	0	0	0	0	0	0	0	0	0	0	0	0	0	0	0	0	0	0	0	0	0	0	0	0	0	0	0	0	0	0	0	0	0	0	0	0	0	0
d__Bacteria	p__Tenericutes	c__Mollicutes	o__Mollicutes_RF9	f__unclassified			X-unclassified	1e-05	3e-05	0	0	0	0	0	0	0	0	0	0	0	0	0	0	0	0	0	0	0	0	0	0	0	0	0	0	0	0	0	0	0	0	0	0	0	0	0	0	0.00417	0.00223
d__Bacteria	p__Tenericutes	c__Mollicutes	o__NB1-n	f__unclassified			X-unclassified	0	0	0	0	0	0	0	0	0	0	0	0	0	0	0	0	0	0	0	1e-05	0	0	0	0	0	0	0	0	0	0	0	0	0	0	0	0	0	0	0	0	0.0007	5e-05
d__Bacteria	p__Verrucomicrobia	c__Spartobacteria	o__Chthoniobacterales	f__LD29	g__unclassified		X-unclassified	0	0	0	0	0.00043	0	0	0	0	0	0	0	0	0	0	0	1e-05	0	0	0	0	0	0	0	0	0	0	0	0	0	0	0	0	0	0	0	0	0	0	0	0	0
d__Bacteria	p__Verrucomicrobia	c__Verrucomicrobiae	o__Verrucomicrobiales	f__Verrucomicrobiaceae	g__Akkermansia	s__unclassified	Akkermansia unclassified	0	0	0	0.00087	0.15406	0.0003	2e-05	1e-05	1e-05	0.0013	0.00109	0.00099	0.00021	0.00163	0.00083	0.00081	0.00024	4e-05	4e-05	0.00033	0.00016	0.00144	0.00199	0.00074	0.00015	0.0002	0.00029	0.00035	0.00041	0.00079	0.0001	9e-05	0	0	1e-05	0	0	2e-05	0.00025	0.00021	0.00014	2e-05
d__Bacteria	p__Verrucomicrobia	c__Verrucomicrobiae	o__Verrucomicrobiales	f__Verrucomicrobiaceae	g__Akkermansia	s__muciniphila	Akkermansia muciniphila	0.00035	0	0	0.23074		0.1536	0.00101	0	0	0.27069	0.23222	0.22092	0.21644	0.26117	0.2379	0.14439	0.10017	0.00234	0.01944	0.12416	0.18671	0.17257	0.20438	0.19778	0.32667	0.30581	0.29224	0.29423	0.2744	0.23716	0.01327	0.00819	0	0	0	0	0.00358	0.07148	0.15256	0.19513	0.01221	0.00111
[truncated: 1 more columns]
