# Supplementary material for: Use of Changestat for Growth Rate Studies of Gut Microbiota
Source: Front Bioeng Biotechnol. 2020 Feb 7;8:24. doi: 10.3389/fbioe.2020.00024 (PMC7019180; doi:10.3389/fbioe.2020.00024)
Supplement: TABLE S2 — Production of metabolites per carbohydrate consumed (mol/mol-carbohydrates and mmol/gDW), carbon recovery, and biomass yield (gDW/g-carbohydrates) during A-stat and De-stat experiments. [file Table_2.XLSX]

## Sheet: Pec_A-stat
Table S2_Pec_A-stat. Production of metabolites per carbohydrate consumed (mol/mol-carbs) and biomass yield (gDW/g-(fiber+mucin)) during A-stat experiment in apple pectin plus mucin medium. Metabolite abbreviations in the tab 'metabolite abbreviations'. Negative value indicate consumption of metabolite.
D	ace	but	etOH	for	isobut	isoval	lact	prop	suc	valer	ala	arg	asp	asn	cys	gln	glu	gly	his	ile	leu	lys	met	phe	pro	ser	thr	trp	tyr	val	muc	CH4	CO2	H2	H2S	Yxs
0.0598461	0.842191	0.0330219	1.46135	0.149048	-0.0110643	-0.0130584	-0.00106344	0.13009	0.131837	-0.0226503	0.0259168	0.00576314	0.012767	0.0248348	0.00861843	0.00549582	0.0253328	0.0446288	0.00934162	0.0240352	0.0485209	0.0273283	0.00672888	0.0133705	0.0519596	0.0577614	0.101888	0.00196637	0.00489752	0.0327622	0.225236	0	0	0	0	0.298415
0.0603143	0.846187	0.0337986	1.4579	0.14825	-0.011044	-0.0129506	-0.00128361	0.131947	0.132066	-0.0224648	0.0259168	0.00576314	0.012767	0.0248348	0.00861843	0.00549582	0.0253328	0.0446288	0.00934162	0.0240352	0.0485209	0.0273283	0.00672888	0.0133705	0.0519596	0.0577614	0.101888	0.00196637	0.00489752	0.0327622	0.225236	0	0	0	0	0.29708
0.0603339	0.853601	0.0348152	1.45748	0.147414	-0.011091	-0.0130689	-0.00162203	0.134544	0.132947	-0.0224252	0.0259168	0.00576314	0.012767	0.0248348	0.00861843	0.00549582	0.0253328	0.0446288	0.00934162	0.0240352	0.0485209	0.0273283	0.00672888	0.0133705	0.0519596	0.0577614	0.101888	0.00196637	0.00489752	0.0327622	0.225236	0	0	0	0	0.293802
0.060254	0.861632	0.0358856	1.45747	0.146557	-0.0111481	-0.0132207	-0.00198335	0.137294	0.133936	-0.0224044	0.0259168	0.00576314	0.012767	0.0248348	0.00861843	0.00549582	0.0253328	0.0446288	0.00934162	0.0240352	0.0485209	0.0273283	0.00672888	0.0133705	0.0519596	0.0577614	0.101888	0.00196637	0.00489752	0.0327622	0.225236	0	0	0	0	0.290194
0.059889	0.871653	0.0371105	1.45902	0.145656	-0.0112414	-0.0134933	-0.00241582	0.140504	0.135289	-0.022458	0.0259168	0.00576314	0.012767	0.0248348	0.00861843	0.00549582	0.0253328	0.0446288	0.00934162	0.0240352	0.0485209	0.0273283	0.00672888	0.0133705	0.0519596	0.0577614	0.101888	0.00196637	0.00489752	0.0327622	0.225236	0	0	0	0	0.285486
0.0599056	0.878639	0.0381314	1.45776	0.14478	-0.0112731	-0.0135593	-0.00274438	0.143072	0.136054	-0.0223756	0.0259168	0.00576314	0.012767	0.0248348	0.00861843	0.00549582	0.0253328	0.0446288	0.00934162	0.0240352	0.0485209	0.0273283	0.00672888	0.0133705	0.0519596	0.0577614	0.101888	0.00196637	0.00489752	0.0327622	0.225236	0	0	0	0	0.282516
0.0597821	0.886526	0.0392291	1.45712	0.143874	-0.0113197	-0.0136751	-0.00310612	0.145861	0.136976	-0.0223219	0.0259168	0.00576314	0.012767	0.0248348	0.00861843	0.00549582	0.0253328	0.0446288	0.00934162	0.0240352	0.0485209	0.0273283	0.00672888	0.0133705	0.0519596	0.0577614	0.101888	0.00196637	0.00489752	0.0327622	0.225236	0	0	0	0	0.279063
0.0597217	0.893799	0.0402936	1.4558	0.142962	-0.0113523	-0.0137438	-0.00344798	0.148535	0.137772	-0.022235	0.0259168	0.00576314	0.012767	0.0248348	0.00861843	0.00549582	0.0253328	0.0446288	0.00934162	0.0240352	0.0485209	0.0273283	0.00672888	0.0133705	0.0519596	0.0577614	0.101888	0.00196637	0.00489752	0.0327622	0.225236	0	0	0	0	0.275975
0.0592708	0.903757	0.0415745	1.45647	0.14198	-0.0114322	-0.0139694	-0.00388721	0.151844	0.139051	-0.0222427	0.0259168	0.00576314	0.012767	0.0248348	0.00861843	0.00549582	0.0253328	0.0446288	0.00934162	0.0240352	0.0485209	0.0273283	0.00672888	0.0133705	0.0519596	0.0577614	0.101888	0.00196637	0.00489752	0.0327622	0.225236	0	0	0	0	0.27142
0.0590928	0.911562	0.0427072	1.45521	0.141021	-0.0114691	-0.0140514	-0.00425205	0.154692	0.139916	-0.0221565	0.0259168	0.00576314	0.012767	0.0248348	0.00861843	0.00549582	0.0253328	0.0446288	0.00934162	0.0240352	0.0485209	0.0273283	0.00672888	0.0133705	0.0519596	0.0577614	0.101888	0.00196637	0.00489752	0.0327622	0.225236	0	0	0	0	0.26809
0.0584492	0.922575	0.0441062	1.45621	0.139965	-0.0115609	-0.0143151	-0.00473448	0.158314	0.14135	-0.0221776	0.0259168	0.00576314	0.012767	0.0248348	0.00861843	0.00549582	0.0253328	0.0446288	0.00934162	0.0240352	0.0485209	0.0273283	0.00672888	0.0133705	0.0519596	0.0577614	0.101888	0.00196637	0.00489752	0.0327622	0.225236	0	0	0	0	0.263024
0.058214	0.930458	0.0452771	1.45457	0.138961	-0.0115928	-0.014379	-0.00510679	0.161239	0.142197	-0.0220712	0.0259168	0.00576314	0.012767	0.0248348	0.00861843	0.00549582	0.0253328	0.0446288	0.00934162	0.0240352	0.0485209	0.0273283	0.00672888	0.0133705	0.0519596	0.0577614	0.101888	0.00196637	0.00489752	0.0327622	0.225236	0	0	0	0	0.259711
0.0576579	0.940502	0.0466386	1.45431	0.137876	-0.0116594	-0.0145574	-0.00556004	0.164709	0.143415	-0.0220292	0.0259168	0.00576314	0.012767	0.0248348	0.00861843	0.00549582	0.0253328	0.0446288	0.00934162	0.0240352	0.0485209	0.0273283	0.00672888	0.0133705	0.0519596	0.0577614	0.101888	0.00196637	0.00489752	0.0327622	0.225236	0	0	0	0	0.255251
0.0573969	0.948242	0.0478309	1.45212	0.136831	-0.0116821	-0.01459	-0.00593194	0.167661	0.144202	-0.0218943	0.0259168	0.00576314	0.012767	0.0248348	0.00861843	0.00549582	0.0253328	0.0446288	0.00934162	0.0240352	0.0485209	0.0273283	0.00672888	0.0133705	0.0519596	0.0577614	0.101888	0.00196637	0.00489752	0.0327622	0.225236	0	0	0	0	0.252076
0.057191	0.95543	0.0489922	1.44934	0.135784	-0.0116923	-0.0145809	-0.0062857	0.170508	0.144876	-0.0217303	0.0259168	0.00576314	0.012767	0.0248348	0.00861843	0.00549582	0.0253328	0.0446288	0.00934162	0.0240352	0.0485209	0.0273283	0.00672888	0.0133705	0.0519596	0.0577614	0.101888	0.00196637	0.00489752	0.0327622	0.225236	0	0	0	0	0.249227
0.0568179	0.963662	0.0502572	1.44707	0.134682	-0.011717	-0.0146191	-0.00668024	0.173639	0.145717	-0.0215891	0.0259168	0.00576314	0.012767	0.0248348	0.00861843	0.00549582	0.0253328	0.0446288	0.00934162	0.0240352	0.0485209	0.0273283	0.00672888	0.0133705	0.0519596	0.0577614	0.101888	0.00196637	0.00489752	0.0327622	0.225236	0	0	0	0	0.245844
0.056763	0.969473	0.0513299	1.44297	0.133644	-0.0116985	-0.0145146	-0.00698698	0.176199	0.146122	-0.0213606	0.0259168	0.00576314	0.012767	0.0248348	0.00861843	0.00549582	0.0253328	0.0446288	0.00934162	0.0240352	0.0485209	0.0273283	0.00672888	0.0133705	0.0519596	0.0577614	0.101888	0.00196637	0.00489752	0.0327622	0.225236	0	0	0	0	0.243782
0.0567455	0.974898	0.0523801	1.43848	0.132607	-0.0116714	-0.0143819	-0.00728079	0.178683	0.146448	-0.0211124	0.0259168	0.00576314	0.012767	0.0248348	0.00861843	0.00549582	0.0253328	0.0446288	0.00934162	0.0240352	0.0485209	0.0273283	0.00672888	0.0133705	0.0519596	0.0577614	0.101888	0.00196637	0.00489752	0.0327622	0.225236	0	0	0	0	0.241944
0.05674	0.980125	0.0534233	1.43373	0.131564	-0.011639	-0.0142319	-0.00756858	0.181135	0.14673	-0.0208509	0.0259168	0.00576314	0.012767	0.0248348	0.00861843	0.00549582	0.0253328	0.0446288	0.00934162	0.0240352	0.0485209	0.0273283	0.00672888	0.0133705	0.0519596	0.0577614	0.101888	0.00196637	0.00489752	0.0327622	0.225236	0	0	0	0	0.240228
0.0568424	0.984513	0.0544004	1.42834	0.130544	-0.0115915	-0.0140323	-0.00782581	0.183389	0.14686	-0.0205587	0.0259168	0.00576314	0.012767	0.0248348	0.00861843	0.00549582	0.0253328	0.0446288	0.00934162	0.0240352	0.0485209	0.0273283	0.00672888	0.0133705	0.0519596	0.0577614	0.101888	0.00196637	0.00489752	0.0327622	0.225236	0	0	0	0	0.238971
0.0567862	0.989867	0.0554753	1.4234	0.129472	-0.011557	-0.0138753	-0.00812103	0.185909	0.147144	-0.0202863	0.0259168	0.00576314	0.012767	0.0248348	0.00861843	0.00549582	0.0253328	0.0446288	0.00934162	0.0240352	0.0485209	0.0273283	0.00672888	0.0133705	0.0519596	0.0577614	0.101888	0.00196637	0.00489752	0.0327622	0.225236	0	0	0	0	0.237222
0.0571453	0.992395	0.0562956	1.41674	0.128517	-0.0114781	-0.0135738	-0.00830905	0.187705	0.146949	-0.0199336	0.0259168	0.00576314	0.012767	0.0248348	0.00861843	0.00549582	0.0253328	0.0446288	0.00934162	0.0240352	0.0485209	0.0273283	0.00672888	0.0133705	0.0519596	0.0577614	0.101888	0.00196637	0.00489752	0.0327622	0.225236	0	0	0	0	0.23696
0.057539	0.9947	0.0570975	1.40994	0.127572	-0.0113953	-0.0132602	-0.0084886	0.189444	0.146714	-0.0195734	0.0259168	0.00576314	0.012767	0.0248348	0.00861843	0.00549582	0.0253328	0.0446288	0.00934162	0.0240352	0.0485209	0.0273283	0.00672888	0.0133705	0.0519596	0.0577614	0.101888	0.00196637	0.00489752	0.0327622	0.225236	0	0	0	0	0.236818
0.0577233	0.998293	0.0580272	1.40377	0.12656	-0.0113304	-0.0130049	-0.00871845	0.191535	0.146687	-0.0192415	0.0259168	0.00576314	0.012767	0.0248348	0.00861843	0.00549582	0.0253328	0.0446288	0.00934162	0.0240352	0.0485209	0.0273283	0.00672888	0.0133705	0.0519596	0.0577614	0.101888	0.00196637	0.00489752	0.0327622	0.225236	0	0	0	0	0.236016
0.0575314	1.00411	0.0591831	1.39859	0.125422	-0.011295	-0.0128451	-0.00903608	0.194242	0.147009	-0.0189538	0.0259168	0.00576314	0.012767	0.0248348	0.00861843	0.00549582	0.0253328	0.0446288	0.00934162	0.0240352	0.0485209	0.0273283	0.00672888	0.0133705	0.0519596	0.0577614	0.101888	0.00196637	0.00489752	0.0327622	0.225236	0	0	0	0	0.234092
0.057452	1.00911	0.0602719	1.39285	0.124311	-0.0112458	-0.0126402	-0.0093237	0.196751	0.147189	-0.018639	0.0259168	0.00576314	0.012767	0.0248348	0.00861843	0.00549582	0.0253328	0.0446288	0.00934162	0.0240352	0.0485209	0.0273283	0.00672888	0.0133705	0.0519596	0.0577614	0.101888	0.00196637	0.00489752	0.0327622	0.225236	0	0	0	0	0.232603
0.0577716	1.01164	0.0611199	1.38586	0.12333	-0.0111613	-0.0123225	-0.00951474	0.198591	0.14697	-0.0182672	0.0259168	0.00576314	0.012767	0.0248348	0.00861843	0.00549582	0.0253328	0.0446288	0.00934162	0.0240352	0.0485209	0.0273283	0.00672888	0.0133705	0.0519596	0.0577614	0.101888	0.00196637	0.00489752	0.0327622	0.225236	0	0	0	0	0.232381
0.0575864	1.01706	0.0622723	1.38004	0.122171	-0.0111134	-0.0121218	-0.00982161	0.201254	0.147194	-0.0179458	0.0259168	0.00576314	0.012767	0.0248348	0.00861843	0.00549582	0.0253328	0.0446288	0.00934162	0.0240352	0.0485209	0.0273283	0.00672888	0.0133705	0.0519596	0.0577614	0.101888	0.00196637	0.00489752	0.0327622	0.225236	0	0	0	0	0.230715
0.0576754	1.02079	0.0632595	1.37336	0.121101	-0.0110414	-0.0118439	-0.0100621	0.203456	0.147146	-0.0175853	0.0259168	0.00576314	0.012767	0.0248348	0.00861843	0.00549582	0.0253328	0.0446288	0.00934162	0.0240352	0.0485209	0.0273283	0.00672888	0.0133705	0.0519596	0.0577614	0.101888	0.00196637	0.00489752	0.0327622	0.225236	0	0	0	0	0.229918
0.0575414	1.02569	0.0643815	1.36701	0.119945	-0.0109819	-0.0116059	-0.0103512	0.206013	0.147267	-0.0172374	0.0259168	0.00576314	0.012767	0.0248348	0.00861843	0.00549582	0.0253328	0.0446288	0.00934162	0.0240352	0.0485209	0.0273283	0.00672888	0.0133705	0.0519596	0.0577614	0.101888	0.00196637	0.00489752	0.0327622	0.225236	0	0	0	0	0.228552
0.0575265	1.02981	0.0654315	1.36022	0.118827	-0.0109106	-0.0113303	-0.0106102	0.208365	0.147259	-0.0168689	0.0259168	0.00576314	0.012767	0.0248348	0.00861843	0.00549582	0.0253328	0.0446288	0.00934162	0.0240352	0.0485209	0.0273283	0.00672888	0.0133705	0.0519596	0.0577614	0.101888	0.00196637	0.00489752	0.0327622	0.225236	0	0	0	0	0.227591
0.0572425	1.03532	0.0666461	1.35374	0.117598	-0.010853	-0.0110975	-0.0109274	0.211145	0.147444	-0.0165111	0.0259168	0.00576314	0.012767	0.0248348	0.00861843	0.00549582	0.0253328	0.0446288	0.00934162	0.0240352	0.0485209	0.0273283	0.00672888	0.0133705	0.0519596	0.0577614	0.101888	0.00196637	0.00489752	0.0327622	0.225236	0	0	0	0	0.225971
0.0570407	1.04025	0.0678116	1.34687	0.116392	-0.0107857	-0.010834	-0.0112229	0.213782	0.14753	-0.0161349	0.0259168	0.00576314	0.012767	0.0248348	0.00861843	0.00549582	0.0253328	0.0446288	0.00934162	0.0240352	0.0485209	0.0273283	0.00672888	0.0133705	0.0519596	0.0577614	0.101888	0.00196637	0.00489752	0.0327622	0.225236	0	0	0	0	0.224658
0.0566908	1.04587	0.0690708	1.34	0.115116	-0.0107228	-0.0105837	-0.011549	0.216653	0.1477	-0.0157556	0.0259168	0.00576314	0.012767	0.0248348	0.00861843	0.00549582	0.0253328	0.0446288	0.00934162	0.0240352	0.0485209	0.0273283	0.00672888	0.0133705	0.0519596	0.0577614	0.101888	0.00196637	0.00489752	0.0327622	0.225236	0	0	0	0	0.223037
0.0562294	1.05197	0.0704041	1.333	0.113781	-0.0106613	-0.0103367	-0.0118975	0.219703	0.14792	-0.0153679	0.0259168	0.00576314	0.012767	0.0248348	0.00861843	0.00549582	0.0253328	0.0446288	0.00934162	0.0240352	0.0485209	0.0273283	0.00672888	0.0133705	0.0519596	0.0577614	0.101888	0.00196637	0.00489752	0.0327622	0.225236	0	0	0	0	0.221215
0.0557784	1.05789	0.0717358	1.32571	0.112435	-0.0105939	-0.0100706	-0.012241	0.222733	0.148095	-0.0149645	0.0259168	0.00576314	0.012767	0.0248348	0.00861843	0.00549582	0.0253328	0.0446288	0.00934162	0.0240352	0.0485209	0.0273283	0.00672888	0.0133705	0.0519596	0.0577614	0.101888	0.00196637	0.00489752	0.0327622	0.225236	0	0	0	0	0.219514
0.0558559	1.06083	0.0727267	1.31762	0.111318	-0.0104944	-0.00970545	-0.0124605	0.224859	0.147843	-0.014529	0.0259168	0.00576314	0.012767	0.0248348	0.00861843	0.00549582	0.0253328	0.0446288	0.00934162	0.0240352	0.0485209	0.0273283	0.00672888	0.0133705	0.0519596	0.0577614	0.101888	0.00196637	0.00489752	0.0327622	0.225236	0	0	0	0	0.219249
0.0559315	1.06372	0.0737187	1.30942	0.110197	-0.0103928	-0.00933382	-0.0126785	0.226981	0.147575	-0.0140874	0.0259168	0.00576314	0.012767	0.0248348	0.00861843	0.00549582	0.0253328	0.0446288	0.00934162	0.0240352	0.0485209	0.0273283	0.00672888	0.0133705	0.0519596	0.0577614	0.101888	0.00196637	0.00489752	0.0327622	0.225236	0	0	0	0	0.219023
0.0561081	1.06602	0.0746453	1.30106	0.109122	-0.0102845	-0.00894225	-0.0128721	0.228926	0.147223	-0.0136385	0.0259168	0.00576314	0.012767	0.0248348	0.00861843	0.00549582	0.0253328	0.0446288	0.00934162	0.0240352	0.0485209	0.0273283	0.00672888	0.0133705	0.0519596	0.0577614	0.101888	0.00196637	0.00489752	0.0327622	0.225236	0	0	0	0	0.219081
0.0560848	1.06928	0.0757005	1.29271	0.107951	-0.0101828	-0.0085707	-0.013108	0.231194	0.146991	-0.0131868	0.0259168	0.00576314	0.012767	0.0248348	0.00861843	0.00549582	0.0253328	0.0446288	0.00934162	0.0240352	0.0485209	0.0273283	0.00672888	0.0133705	0.0519596	0.0577614	0.101888	0.00196637	0.00489752	0.0327622	0.225236	0	0	0	0	0.218706
0.0563712	1.07094	0.0765567	1.28414	0.106926	-0.0100667	-0.00815646	-0.0132745	0.232946	0.146544	-0.0127283	0.0259168	0.00576314	0.012767	0.0248348	0.00861843	0.00549582	0.0253328	0.0446288	0.00934162	0.0240352	0.0485209	0.0273283	0.00672888	0.0133705	0.0519596	0.0577614	0.101888	0.00196637	0.00489752	0.0327622	0.225236	0	0	0	0	0.219081
0.0566103	1.07281	0.077444	1.27554	0.105878	-0.00995148	-0.00774529	-0.0134505	0.234772	0.146121	-0.0122672	0.0259168	0.00576314	0.012767	0.0248348	0.00861843	0.00549582	0.0253328	0.0446288	0.00934162	0.0240352	0.0485209	0.0273283	0.00672888	0.0133705	0.0519596	0.0577614	0.101888	0.00196637	0.00489752	0.0327622	0.225236	0	0	0	0	0.219366
0.0570568	1.07369	0.0782023	1.2669	0.10493	-0.00982873	-0.00731293	-0.0135826	0.236266	0.145573	-0.0118068	0.0259168	0.00576314	0.012767	0.0248348	0.00861843	0.00549582	0.0253328	0.0446288	0.00934162	0.0240352	0.0485209	0.0273283	0.00672888	0.0133705	0.0519596	0.0577614	0.101888	0.00196637	0.00489752	0.0327622	0.225236	0	0	0	0	0.220101
0.0574118	1.07501	0.0790203	1.25826	0.103939	-0.00970879	-0.00688947	-0.0137341	0.237909	0.145079	-0.0113444	0.0259168	0.00576314	0.012767	0.0248348	0.00861843	0.00549582	0.0253328	0.0446288	0.00934162	0.0240352	0.0485209	0.0273283	0.00672888	0.0133705	0.0519596	0.0577614	0.101888	0.00196637	0.00489752	0.0327622	0.225236	0	0	0	0	0.220639
0.0574819	1.07758	0.0800149	1.24953	0.102812	-0.00959566	-0.00648554	-0.0139422	0.239991	0.144732	-0.0108719	0.0259168	0.00576314	0.012767	0.0248348	0.00861843	0.00549582	0.0253328	0.0446288	0.00934162	0.0240352	0.0485209	0.0273283	0.00672888	0.0133705	0.0519596	0.0577614	0.101888	0.00196637	0.00489752	0.0327622	0.225236	0	0	0	0	0.220628
0.057664	1.07961	0.0809404	1.24075	0.101738	-0.00947806	-0.00606921	-0.0141263	0.241893	0.144316	-0.0103986	0.0259168	0.00576314	0.012767	0.0248348	0.00861843	0.00549582	0.0253328	0.0446288	0.00934162	0.0240352	0.0485209	0.0273283	0.00672888	0.0133705	0.0519596	0.0577614	0.101888	0.00196637	0.00489752	0.0327622	0.225236	0	0	0	0	0.220866
0.0578615	1.08154	0.0818567	1.23192	0.100672	-0.00935884	-0.00564867	-0.0143061	0.243766	0.143883	-0.00992254	0.0259168	0.00576314	0.012767	0.0248348	0.00861843	0.00549582	0.0253328	0.0446288	0.00934162	0.0240352	0.0485209	0.0273283	0.00672888	0.0133705	0.0519596	0.0577614	0.101888	0.00196637	0.00489752	0.0327622	0.225236	0	0	0	0	0.221157
0.0579928	1.0837	0.0828131	1.223	0.0995748	-0.00923955	-0.00522795	-0.0144974	0.245733	0.143472	-0.00943986	0.0259168	0.00576314	0.012767	0.0248348	0.00861843	0.00549582	0.0253328	0.0446288	0.00934162	0.0240352	0.0485209	0.0273283	0.00672888	0.0133705	0.0519596	0.0577614	0.101888	0.00196637	0.00489752	0.0327622	0.225236	0	0	0	0	0.221355
0.058254	1.0853	0.0836911	1.21411	0.0985417	-0.00911686	-0.0047987	-0.0146628	0.247501	0.142995	-0.00896079	0.0259168	0.00576314	0.012767	0.0248348	0.00861843	0.00549582	0.0253328	0.0446288	0.00934162	0.0240352	0.0485209	0.0273283	0.00672888	0.0133705	0.0519596	0.0577614	0.101888	0.00196637	0.00489752	0.0327622	0.225236	0	0	0	0	0.221802
0.0583801	1.08741	0.0846505	1.20507	0.0974428	-0.00899498	-0.00437127	-0.0148522	0.249463	0.142568	-0.00847081	0.0259168	0.00576314	0.012767	0.0248348	0.00861843	0.00549582	0.0253328	0.0446288	0.00934162	0.0240352	0.0485209	0.0273283	0.00672888	0.0133705	0.0519596	0.0577614	0.101888	0.00196637	0.00489752	0.0327622	0.225236	0	0	0	0	0.222042
0.0585035	1.08948	0.0856111	1.19596	0.0963432	-0.00887167	-0.00394005	-0.0150407	0.251422	0.142132	-0.00797684	0.0259168	0.00576314	0.012767	0.0248348	0.00861843	0.00549582	0.0253328	0.0446288	0.00934162	0.0240352	0.0485209	0.0273283	0.00672888	0.0133705	0.0519596	0.0577614	0.101888	0.00196637	0.00489752	0.0327622	0.225236	0	0	0	0	0.222307
0.0585011	1.09198	0.0866462	1.18663	0.095181	-0.00874785	-0.00350646	-0.0152501	0.253555	0.141733	-0.00746948	0.0259168	0.00576314	0.012767	0.0248348	0.00861843	0.00549582	0.0253328	0.0446288	0.00934162	0.0240352	0.0485209	0.0273283	0.00672888	0.0133705	0.0519596	0.0577614	0.101888	0.00196637	0.00489752	0.0327622	0.225236	0	0	0	0	0.222407
0.0585037	1.09441	0.0876777	1.17722	0.0940215	-0.00862203	-0.00306739	-0.0154567	0.255671	0.141318	-0.00695738	0.0259168	0.00576314	0.012767	0.0248348	0.00861843	0.00549582	0.0253328	0.0446288	0.00934162	0.0240352	0.0485209	0.0273283	0.00672888	0.0133705	0.0519596	0.0577614	0.101888	0.00196637	0.00489752	0.0327622	0.225236	0	0	0	0	0.222553
0.0584075	1.09713	0.0887675	1.16759	0.0928113	-0.0084946	-0.00262272	-0.0156788	0.25792	0.140923	-0.0064315	0.0259168	0.00576314	0.012767	0.0248348	0.00861843	0.00549582	0.0253328	0.0446288	0.00934162	0.0240352	0.0485209	0.0273283	0.00672888	0.0133705	0.0519596	0.0577614	0.101888	0.00196637	0.00489752	0.0327622	0.225236	0	0	0	0	0.222595
0.0581966	1.1002	0.0899259	1.15767	0.0915406	-0.00836497	-0.0021703	-0.0159189	0.260325	0.140548	-0.00588854	0.0259168	0.00576314	0.012767	0.0248348	0.00861843	0.00549582	0.0253328	0.0446288	0.00934162	0.0240352	0.0485209	0.0273283	0.00672888	0.0133705	0.0519596	0.0577614	0.101888	0.00196637	0.00489752	0.0327622	0.225236	0	0	0	0	0.222519
0.0582379	1.10229	0.0909319	1.14805	0.0904019	-0.00823302	-0.00171486	-0.0161122	0.262355	0.140077	-0.00536432	0.0259168	0.00576314	0.012767	0.0248348	0.00861843	0.00549582	0.0253328	0.0446288	0.00934162	0.0240352	0.0485209	0.0273283	0.00672888	0.0133705	0.0519596	0.0577614	0.101888	0.00196637	0.00489752	0.0327622	0.225236	0	0	0	0	0.222844
0.0578402	1.10587	0.0922033	1.13756	0.0890293	-0.00809785	-0.00124394	-0.0163804	0.265009	0.139723	-0.00478813	0.0259168	0.00576314	0.012767	0.0248348	0.00861843	0.00549582	0.0253328	0.0446288	0.00934162	0.0240352	0.0485209	0.0273283	0.00672888	0.0133705	0.0519596	0.0577614	0.101888	0.00196637	0.00489752	0.0327622	0.225236	0	0	0	0	0.222612
0.0575518	1.10898	0.0934098	1.12712	0.0877118	-0.00795993	-0.00076665	-0.016627	0.267496	0.139315	-0.0042152	0.0259168	0.00576314	0.012767	0.0248348	0.00861843	0.00549582	0.0253328	0.0446288	0.00934162	0.0240352	0.0485209	0.0273283	0.00672888	0.0133705	0.0519596	0.0577614	0.101888	0.00196637	0.00489752	0.0327622	0.225236	0	0	0	0	0.222586
0.0573711	1.11165	0.0945503	1.11677	0.0864522	-0.00782004	-0.000285652	-0.0168524	0.269817	0.138859	-0.00364787	0.0259168	0.00576314	0.012767	0.0248348	0.00861843	0.00549582	0.0253328	0.0446288	0.00934162	0.0240352	0.0485209	0.0273283	0.00672888	0.0133705	0.0519596	0.0577614	0.101888	0.00196637	0.00489752	0.0327622	0.225236	0	0	0	0	0.222751
0.0572962	1.11389	0.0956247	1.10655	0.085252	-0.00767896	0.000196536	-0.017057	0.271974	0.13836	-0.00308823	0.0259168	0.00576314	0.012767	0.0248348	0.00861843	0.00549582	0.0253328	0.0446288	0.00934162	0.0240352	0.0485209	0.0273283	0.00672888	0.0133705	0.0519596	0.0577614	0.101888	0.00196637	0.00489752	0.0327622	0.225236	0	0	0	0	0.223069
0.0573422	1.11566	0.0966229	1.09654	0.0841221	-0.00753762	0.000676573	-0.0172387	0.273944	0.13782	-0.00254053	0.0259168	0.00576314	0.012767	0.0248348	0.00861843	0.00549582	0.0253328	0.0446288	0.00934162	0.0240352	0.0485209	0.0273283	0.00672888	0.0133705	0.0519596	0.0577614	0.101888	0.00196637	0.00489752	0.0327622	0.225236	0	0	0	0	0.223532
0.0570822	1.1184	0.0978112	1.08573	0.0828198	-0.00739057	0.00117828	-0.0174713	0.27635	0.137339	-0.00194637	0.0259168	0.00576314	0.012767	0.0248348	0.00861843	0.00549582	0.0253328	0.0446288	0.00934162	0.0240352	0.0485209	0.0273283	0.00672888	0.0133705	0.0519596	0.0577614	0.101888	0.00196637	0.00489752	0.0327622	0.225236	0	0	0	0	0.22366
0.0569242	1.12075	0.0989357	1.07508	0.0815765	-0.0072428	0.00167954	-0.0176841	0.278598	0.136821	-0.00136088	0.0259168	0.00576314	0.012767	0.0248348	0.00861843	0.00549582	0.0253328	0.0446288	0.00934162	0.0240352	0.0485209	0.0273283	0.00672888	0.0133705	0.0519596	0.0577614	0.101888	0.00196637	0.00489752	0.0327622	0.225236	0	0	0	0	0.223951
0.0568967	1.12261	0.099977	1.06469	0.0804112	-0.00709558	0.00217578	-0.0178725	0.280645	0.136264	-0.000790637	0.0259168	0.00576314	0.012767	0.0248348	0.00861843	0.00549582	0.0253328	0.0446288	0.00934162	0.0240352	0.0485209	0.0273283	0.00672888	0.0133705	0.0519596	0.0577614	0.101888	0.00196637	0.00489752	0.0327622	0.225236	0	0	0	0	0.224424
0.0567464	1.12482	0.101095	1.05392	0.0791764	-0.00694444	0.00268508	-0.0180798	0.282861	0.13572	-0.000197401	0.0259168	0.00576314	0.012767	0.0248348	0.00861843	0.00549582	0.0253328	0.0446288	0.00934162	0.0240352	0.0485209	0.0273283	0.00672888	0.0133705	0.0519596	0.0577614	0.101888	0.00196637	0.00489752	0.0327622	0.225236	0	0	0	0	0.224792
0.0566097	1.12693	0.102204	1.04311	0.0779518	-0.00679185	0.00319746	-0.0182829	0.285048	0.135161	0.00039809	0.0259168	0.00576314	0.012767	0.0248348	0.00861843	0.00549582	0.0253328	0.0446288	0.00934162	0.0240352	0.0485209	0.0273283	0.00672888	0.0133705	0.0519596	0.0577614	0.101888	0.00196637	0.00489752	0.0327622	0.225236	0	0	0	0	0.225157
0.0564536	1.12905	0.103325	1.03217	0.0767181	-0.00663713	0.00371555	-0.0184872	0.287252	0.134595	0.0010011	0.0259168	0.00576314	0.012767	0.0248348	0.00861843	0.00549582	0.0253328	0.0446288	0.00934162	0.0240352	0.0485209	0.0273283	0.00672888	0.0133705	0.0519596	0.0577614	0.101888	0.00196637	0.00489752	0.0327622	0.225236	0	0	0	0	0.225508
0.0564186	1.13075	0.104367	1.02156	0.0755609	-0.00648407	0.00422502	-0.0186693	0.28927	0.134001	0.00158655	0.0259168	0.00576314	0.012767	0.0248348	0.00861843	0.00549582	0.0253328	0.0446288	0.00934162	0.0240352	0.0485209	0.0273283	0.00672888	0.0133705	0.0519596	0.0577614	0.101888	0.00196637	0.00489752	0.0327622	0.225236	0	0	0	0	0.226011
0.0558003	1.13417	0.105787	1.009	0.0740468	-0.0063127	0.00480052	-0.0189472	0.292134	0.133472	0.00228332	0.0259168	0.00576314	0.012767	0.0248348	0.00861843	0.00549582	0.0253328	0.0446288	0.00934162	0.0240352	0.0485209	0.0273283	0.00672888	0.0133705	0.0519596	0.0577614	0.101888	0.00196637	0.00489752	0.0327622	0.225236	0	0	0	0	0.225971
0.0558109	1.13563	0.106797	0.998415	0.0729248	-0.00615783	0.005312	-0.0191174	0.294063	0.132851	0.00286807	0.0259168	0.00576314	0.012767	0.0248348	0.00861843	0.00549582	0.0253328	0.0446288	0.00934162	0.0240352	0.0485209	0.0273283	0.00672888	0.0133705	0.0519596	0.0577614	0.101888	0.00196637	0.00489752	0.0327622	0.225236	0	0	0	0	0.226579
0.0560029	1.13654	0.107688	0.988443	0.0719217	-0.00600822	0.0058023	-0.0192562	0.295718	0.132209	0.00341871	0.0259168	0.00576314	0.012767	0.0248348	0.00861843	0.00549582	0.0253328	0.0446288	0.00934162	0.0240352	0.0485209	0.0273283	0.00672888	0.0133705	0.0519596	0.0577614	0.101888	0.00196637	0.00489752	0.0327622	0.225236	0	0	0	0	0.227366
0.0560025	1.13799	0.108703	0.977803	0.0708033	-0.00585177	0.00631587	-0.0194255	0.297646	0.131582	0.00400811	0.0259168	0.00576314	0.012767	0.0248348	0.00861843	0.00549582	0.0253328	0.0446288	0.00934162	0.0240352	0.0485209	0.0273283	0.00672888	0.0133705	0.0519596	0.0577614	0.101888	0.00196637	0.00489752	0.0327622	0.225236	0	0	0	0	0.227987
0.0558692	1.13978	0.109803	0.966666	0.0696065	-0.00568968	0.00684777	-0.0196148	0.299758	0.130961	0.00462653	0.0259168	0.00576314	0.012767	0.0248348	0.00861843	0.00549582	0.0253328	0.0446288	0.00934162	0.0240352	0.0485209	0.0273283	0.00672888	0.0133705	0.0519596	0.0577614	0.101888	0.00196637	0.00489752	0.0327622	0.225236	0	0	0	0	0.228514
0.0557359	1.14154	0.110903	0.955494	0.0684143	-0.00552643	0.00738163	-0.0198024	0.30186	0.130333	0.00524771	0.0259168	0.00576314	0.012767	0.0248348	0.00861843	0.00549582	0.0253328	0.0446288	0.00934162	0.0240352	0.0485209	0.0273283	0.00672888	0.0133705	0.0519596	0.0577614	0.101888	0.00196637	0.00489752	0.0327622	0.225236	0	0	0	0	0.229061
0.0557125	1.14296	0.111929	0.944715	0.0672977	-0.0053666	0.00790125	-0.0199705	0.303793	0.129693	0.00584741	0.0259168	0.00576314	0.012767	0.0248348	0.00861843	0.00549582	0.0253328	0.0446288	0.00934162	0.0240352	0.0485209	0.0273283	0.00672888	0.0133705	0.0519596	0.0577614	0.101888	0.00196637	0.00489752	0.0327622	0.225236	0	0	0	0	0.229714
0.0559009	1.14379	0.112815	0.934762	0.0663231	-0.00521511	0.00838941	-0.0201037	0.305411	0.129044	0.00640129	0.0259168	0.00576314	0.012767	0.0248348	0.00861843	0.00549582	0.0253328	0.0446288	0.00934162	0.0240352	0.0485209	0.0273283	0.00672888	0.0133705	0.0519596	0.0577614	0.101888	0.00196637	0.00489752	0.0327622	0.225236	0	0	0	0	0.230534
0.0556445	1.14578	0.113991	0.923061	0.0650696	-0.0050442	0.00894411	-0.0203057	0.30766	0.128405	0.00705504	0.0259168	0.00576314	0.012767	0.0248348	0.00861843	0.00549582	0.0253328	0.0446288	0.00934162	0.0240352	0.0485209	0.0273283	0.00672888	0.0133705	0.0519596	0.0577614	0.101888	0.00196637	0.00489752	0.0327622	0.225236	0	0	0	0	0.23104
0.0556605	1.14703	0.114987	0.912438	0.0639976	-0.00488447	0.00945742	-0.0204633	0.309508	0.127757	0.00764878	0.0259168	0.00576314	0.012767	0.0248348	0.00861843	0.00549582	0.0253328	0.0446288	0.00934162	0.0240352	0.0485209	0.0273283	0.00672888	0.0133705	0.0519596	0.0577614	0.101888	0.00196637	0.00489752	0.0327622	0.225236	0	0	0	0	0.231753
0.0556529	1.14832	0.115997	0.901727	0.0629173	-0.0047233	0.00997376	-0.0206232	0.311381	0.127107	0.00824844	0.0259168	0.00576314	0.012767	0.0248348	0.00861843	0.00549582	0.0253328	0.0446288	0.00934162	0.0240352	0.0485209	0.0273283	0.00672888	0.0133705	0.0519596	0.0577614	0.101888	0.00196637	0.00489752	0.0327622	0.225236	0	0	0	0	0.232457
0.0555833	1.14976	0.117047	0.890765	0.061804	-0.00455879	0.0104997	-0.0207912	0.313333	0.126456	0.00886336	0.0259168	0.00576314	0.012767	0.0248348	0.00861843	0.00549582	0.0253328	0.0446288	0.00934162	0.0240352	0.0485209	0.0273283	0.00672888	0.0133705	0.0519596	0.0577614	0.101888	0.00196637	0.00489752	0.0327622	0.225236	0	0	0	0	0.23313
0.0556825	1.15075	0.117984	0.880539	0.0608079	-0.00440232	0.0109958	-0.0209321	0.315036	0.125807	0.00943778	0.0259168	0.00576314	0.012767	0.0248348	0.00861843	0.00549582	0.0253328	0.0446288	0.00934162	0.0240352	0.0485209	0.0273283	0.00672888	0.0133705	0.0519596	0.0577614	0.101888	0.00196637	0.00489752	0.0327622	0.225236	0	0	0	0	0.23391
0.055963	1.15132	0.118801	0.871134	0.0599366	-0.00425527	0.0114577	-0.021045	0.316478	0.125167	0.0099669	0.0259168	0.00576314	0.012767	0.0248348	0.00861843	0.00549582	0.0253328	0.0446288	0.00934162	0.0240352	0.0485209	0.0273283	0.00672888	0.0133705	0.0519596	0.0577614	0.101888	0.00196637	0.00489752	0.0327622	0.225236	0	0	0	0	0.234789
0.0557095	1.15314	0.119965	0.859425	0.0587276	-0.00408062	0.0120123	-0.0212365	0.318659	0.124508	0.0106273	0.0259168	0.00576314	0.012767	0.0248348	0.00861843	0.00549582	0.0253328	0.0446288	0.00934162	0.0240352	0.0485209	0.0273283	0.00672888	0.0133705	0.0519596	0.0577614	0.101888	0.00196637	0.00489752	0.0327622	0.225236	0	0	0	0	0.235375
0.0556412	1.15451	0.121007	0.848541	0.0576464	-0.00391522	0.012533	-0.021399	0.320572	0.123856	0.0112423	0.0259168	0.00576314	0.012767	0.0248348	0.00861843	0.00549582	0.0253328	0.0446288	0.00934162	0.0240352	0.0485209	0.0273283	0.00672888	0.0133705	0.0519596	0.0577614	0.101888	0.00196637	0.00489752	0.0327622	0.225236	0	0	0	0	0.236068
0.0556543	1.15568	0.121994	0.83805	0.0566267	-0.00375417	0.0130367	-0.0215482	0.322362	0.123209	0.0118362	0.0259168	0.00576314	0.012767	0.0248348	0.00861843	0.00549582	0.0253328	0.0446288	0.00934162	0.0240352	0.0485209	0.0273283	0.00672888	0.0133705	0.0519596	0.0577614	0.101888	0.00196637	0.00489752	0.0327622	0.225236	0	0	0	0	0.236805
0.055512	1.15719	0.123082	0.826872	0.055514	-0.00358428	0.0135681	-0.0217187	0.324358	0.122553	0.0124702	0.0259168	0.00576314	0.012767	0.0248348	0.00861843	0.00549582	0.0253328	0.0446288	0.00934162	0.0240352	0.0485209	0.0273283	0.00672888	0.0133705	0.0519596	0.0577614	0.101888	0.00196637	0.00489752	0.0327622	0.225236	0	0	0	0	0.23747
0.055466	1.15848	0.124104	0.816168	0.0544731	-0.00341977	0.0140791	-0.021874	0.326211	0.121904	0.0130787	0.0259168	0.00576314	0.012767	0.0248348	0.00861843	0.00549582	0.0253328	0.0446288	0.00934162	0.0240352	0.0485209	0.0273283	0.00672888	0.0133705	0.0519596	0.0577614	0.101888	0.00196637	0.00489752	0.0327622	0.225236	0	0	0	0	0.238182
0.0553633	1.15988	0.125163	0.805228	0.0534042	-0.00325188	0.0145992	-0.0220361	0.328134	0.121252	0.0137018	0.0259168	0.00576314	0.012767	0.0248348	0.00861843	0.00549582	0.0253328	0.0446288	0.00934162	0.0240352	0.0485209	0.0273283	0.00672888	0.0133705	0.0519596	0.0577614	0.101888	0.00196637	0.00489752	0.0327622	0.225236	0	0	0	0	0.23887
0.05502	1.16179	0.12638	0.793141	0.0521846	-0.00306899	0.0151669	-0.0222314	0.330381	0.120577	0.0143911	0.0259168	0.00576314	0.012767	0.0248348	0.00861843	0.00549582	0.0253328	0.0446288	0.00934162	0.0240352	0.0485209	0.0273283	0.00672888	0.0133705	0.0519596	0.0577614	0.101888	0.00196637	0.00489752	0.0327622	0.225236	0	0	0	0	0.239466
0.0551988	1.16257	0.127247	0.783649	0.0513216	-0.00291862	0.0156239	-0.0223506	0.331893	0.119959	0.0149351	0.0259168	0.00576314	0.012767	0.0248348	0.00861843	0.00549582	0.0253328	0.0446288	0.00934162	0.0240352	0.0485209	0.0273283	0.00672888	0.0133705	0.0519596	0.0577614	0.101888	0.00196637	0.00489752	0.0327622	0.225236	0	0	0	0	0.240262
0.0552599	1.16361	0.128192	0.773638	0.0503901	-0.0027614	0.0161014	-0.0224858	0.333561	0.119334	0.0155099	0.0259168	0.00576314	0.012767	0.0248348	0.00861843	0.00549582	0.0253328	0.0446288	0.00934162	0.0240352	0.0485209	0.0273283	0.00672888	0.0133705	0.0519596	0.0577614	0.101888	0.00196637	0.00489752	0.0327622	0.225236	0	0	0	0	0.241002
0.0555955	1.16411	0.128954	0.765057	0.0496484	-0.00262251	0.0165163	-0.0225823	0.334849	0.11875	0.0160051	0.0259168	0.00576314	0.012767	0.0248348	0.00861843	0.00549582	0.0253328	0.0446288	0.00934162	0.0240352	0.0485209	0.0273283	0.00672888	0.0133705	0.0519596	0.0577614	0.101888	0.00196637	0.00489752	0.0327622	0.225236	0	0	0	0	0.241819
0.0557903	1.16492	0.129808	0.755846	0.0488232	-0.00247539	0.0169564	-0.0226981	0.336326	0.118157	0.0165373	0.0259168	0.00576314	0.012767	0.0248348	0.00861843	0.00549582	0.0253328	0.0446288	0.00934162	0.0240352	0.0485209	0.0273283	0.00672888	0.0133705	0.0519596	0.0577614	0.101888	0.00196637	0.00489752	0.0327622	0.225236	0	0	0	0	0.242571
0.0560181	1.16568	0.13064	0.746872	0.0480286	-0.00233124	0.0173847	-0.0228092	0.337754	0.117577	0.0170575	0.0259168	0.00576314	0.012767	0.0248348	0.00861843	0.00549582	0.0253328	0.0446288	0.00934162	0.0240352	0.0485209	0.0273283	0.00672888	0.0133705	0.0519596	0.0577614	0.101888	0.00196637	0.00489752	0.0327622	0.225236	0	0	0	0	0.243314
0.0559172	1.16709	0.131683	0.736327	0.0470336	-0.00216613	0.0178793	-0.0229634	0.339609	0.116957	0.0176683	0.0259168	0.00576314	0.012767	0.0248348	0.00861843	0.00549582	0.0253328	0.0446288	0.00934162	0.0240352	0.0485209	0.0273283	0.00672888	0.0133705	0.0519596	0.0577614	0.101888	0.00196637	0.00489752	0.0327622	0.225236	0	0	0	0	0.243957
0.0558969	1.16835	0.132672	0.72625	0.0461015	-0.0020069	0.0183522	-0.0231058	0.341348	0.116356	0.0182541	0.0259168	0.00576314	0.012767	0.0248348	0.00861843	0.00549582	0.0253328	0.0446288	0.00934162	0.0240352	0.0485209	0.0273283	0.00672888	0.0133705	0.0519596	0.0577614	0.101888	0.00196637	0.00489752	0.0327622	0.225236	0	0	0	0	0.244611
0.0560173	1.16936	0.133568	0.716961	0.0452705	-0.00185794	0.0187893	-0.023229	0.342895	0.115783	0.0187967	0.0259168	0.00576314	0.012767	0.0248348	0.00861843	0.00549582	0.0253328	0.0446288	0.00934162	0.0240352	0.0485209	0.0273283	0.00672888	0.0133705	0.0519596	0.0577614	0.101888	0.00196637	0.00489752	0.0327622	0.225236	0	0	0	0	0.245282
0.0561409	1.17039	0.134461	0.707769	0.0444525	-0.0017101	0.0192205	-0.0233513	0.344431	0.115219	0.0193354	0.0259168	0.00576314	0.012767	0.0248348	0.00861843	0.00549582	0.0253328	0.0446288	0.00934162	0.0240352	0.0485209	0.0273283	0.00672888	0.0133705	0.0519596	0.0577614	0.101888	0.00196637	0.00489752	0.0327622	0.225236	0	0	0	0	0.245936
0.0561546	1.17163	0.135422	0.698099	0.0435765	-0.00155556	0.0196707	-0.0234869	0.346102	0.114646	0.0199029	0.0259168	0.00576314	0.012767	0.0248348	0.00861843	0.00549582	0.0253328	0.0446288	0.00934162	0.0240352	0.0485209	0.0273283	0.00672888	0.0133705	0.0519596	0.0577614	0.101888	0.00196637	0.00489752	0.0327622	0.225236	0	0	0	0	0.246552
0.0564169	1.17245	0.136223	0.689785	0.0428677	-0.0014193	0.0200599	-0.0235906	0.347448	0.114125	0.0203948	0.0259168	0.00576314	0.012767	0.0248348	0.00861843	0.00549582	0.0253328	0.0446288	0.00934162	0.0240352	0.0485209	0.0273283	0.00672888	0.0133705	0.0519596	0.0577614	0.101888	0.00196637	0.00489752	0.0327622	0.225236	0	0	0	0	0.247192
0.0564149	1.17376	0.13719	0.680209	0.0420058	-0.00126559	0.0205025	-0.0237269	0.349123	0.113568	0.0209603	0.0259168	0.00576314	0.012767	0.0248348	0.00861843	0.00549582	0.0253328	0.0446288	0.00934162	0.0240352	0.0485209	0.0273283	0.00672888	0.0133705	0.0519596	0.0577614	0.101888	0.00196637	0.00489752	0.0327622	0.225236	0	0	0	0	0.247769
0.0565959	1.17477	0.13804	0.671661	0.0412689	-0.00112581	0.0208981	-0.02384	0.350561	0.113053	0.0214689	0.0259168	0.00576314	0.012767	0.0248348	0.00861843	0.00549582	0.0253328	0.0446288	0.00934162	0.0240352	0.0485209	0.0273283	0.00672888	0.0133705	0.0519596	0.0577614	0.101888	0.00196637	0.00489752	0.0327622	0.225236	0	0	0	0	0.248352
0.0564359	1.17638	0.139102	0.661456	0.0403353	-0.000962835	0.0213646	-0.0239939	0.352416	0.112486	0.022074	0.0259168	0.00576314	0.012767	0.0248348	0.00861843	0.00549582	0.0253328	0.0446288	0.00934162	0.0240352	0.0485209	0.0273283	0.00672888	0.0133705	0.0519596	0.0577614	0.101888	0.00196637	0.00489752	0.0327622	0.225236	0	0	0	0	0.248871
0.0563717	1.17784	0.140101	0.651833	0.0394737	-0.000807602	0.0218037	-0.0241354	0.354142	0.111946	0.0226477	0.0259168	0.00576314	0.012767	0.0248348	0.00861843	0.00549582	0.0253328	0.0446288	0.00934162	0.0240352	0.0485209	0.0273283	0.00672888	0.0133705	0.0519596	0.0577614	0.101888	0.00196637	0.00489752	0.0327622	0.225236	0	0	0	0	0.249383
0.0560636	1.17971	0.141253	0.641028	0.0384762	-0.00063542	0.0222929	-0.0243053	0.356163	0.111367	0.0232912	0.0259168	0.00576314	0.012767	0.0248348	0.00861843	0.00549582	0.0253328	0.0446288	0.00934162	0.0240352	0.0485209	0.0273283	0.00672888	0.0133705	0.0519596	0.0577614	0.101888	0.00196637	0.00489752	0.0327622	0.225236	0	0	0	0	0.249853
0.0560004	1.18121	0.142248	0.631601	0.0376431	-0.000482207	0.0227194	-0.0244447	0.357869	0.110847	0.0238578	0.0259168	0.00576314	0.012767	0.0248348	0.00861843	0.00549582	0.0253328	0.0446288	0.00934162	0.0240352	0.0485209	0.0273283	0.00672888	0.0133705	0.0519596	0.0577614	0.101888	0.00196637	0.00489752	0.0327622	0.225236	0	0	0	0	0.250328
0.0559502	1.18271	0.143232	0.622347	0.0368322	-0.000331138	0.023136	-0.0245819	0.359549	0.11034	0.0244164	0.0259168	0.00576314	0.012767	0.0248348	0.00861843	0.00549582	0.0253328	0.0446288	0.00934162	0.0240352	0.0485209	0.0273283	0.00672888	0.0133705	0.0519596	0.0577614	0.101888	0.00196637	0.00489752	0.0327622	0.225236	0	0	0	0	0.250781
0.0561557	1.18384	0.144051	0.614561	0.0361911	-0.000200677	0.0234856	-0.0246881	0.360905	0.109898	0.0248925	0.0259168	0.00576314	0.012767	0.0248348	0.00861843	0.00549582	0.0253328	0.0446288	0.00934162	0.0240352	0.0485209	0.0273283	0.00672888	0.0133705	0.0519596	0.0577614	0.101888	0.00196637	0.00489752	0.0327622	0.225236	0	0	0	0	0.251228
0.0563975	1.18495	0.144847	0.607074	0.0355836	-7.43653e-05	0.0238196	-0.0247902	0.362213	0.109476	0.0253533	0.0259168	0.00576314	0.012767	0.0248348	0.00861843	0.00549582	0.0253328	0.0446288	0.00934162	0.0240352	0.0485209	0.0273283	0.00672888	0.0133705	0.0519596	0.0577614	0.101888	0.00196637	0.00489752	0.0327622	0.225236	0	0	0	0	0.251647
0.0561162	1.18689	0.145969	0.596947	0.0346776	9.00461e-05	0.0242682	-0.0249522	0.36415	0.108959	0.0259687	0.0259168	0.00576314	0.012767	0.0248348	0.00861843	0.00549582	0.0253328	0.0446288	0.00934162	0.0240352	0.0485209	0.0273283	0.00672888	0.0133705	0.0519596	0.0577614	0.101888	0.00196637	0.00489752	0.0327622	0.225236	0	0	0	0	0.251999
0.0561166	1.18843	0.146911	0.588426	0.0339553	0.000231707	0.0246432	-0.025081	0.365734	0.108514	0.0264934	0.0259168	0.00576314	0.012767	0.0248348	0.00861843	0.00549582	0.0253328	0.0446288	0.00934162	0.0240352	0.0485209	0.0273283	0.00672888	0.0133705	0.0519596	0.0577614	0.101888	0.00196637	0.00489752	0.0327622	0.225236	0	0	0	0	0.252333
0.056166	1.18993	0.147821	0.580289	0.033277	0.000368068	0.0249988	-0.0252037	0.367251	0.108093	0.0269982	0.0259168	0.00576314	0.012767	0.0248348	0.00861843	0.00549582	0.0253328	0.0446288	0.00934162	0.0240352	0.0485209	0.0273283	0.00672888	0.0133705	0.0519596	0.0577614	0.101888	0.00196637	0.00489752	0.0327622	0.225236	0	0	0	0	0.25264
0.0558628	1.19199	0.14895	0.570403	0.0324061	0.000530171	0.0254292	-0.0253659	0.369185	0.10761	0.0276069	0.0259168	0.00576314	0.012767	0.0248348	0.00861843	0.00549582	0.0253328	0.0446288	0.00934162	0.0240352	0.0485209	0.0273283	0.00672888	0.0133705	0.0519596	0.0577614	0.101888	0.00196637	0.00489752	0.0327622	0.225236	0	0	0	0	0.252903
0.0561138	1.19326	0.149727	0.563602	0.0318775	0.000647609	0.0257207	-0.0254647	0.370442	0.107262	0.0280386	0.0259168	0.00576314	0.012767	0.0248348	0.00861843	0.00549582	0.0253328	0.0446288	0.00934162	0.0240352	0.0485209	0.0273283	0.00672888	0.0133705	0.0519596	0.0577614	0.101888	0.00196637	0.00489752	0.0327622	0.225236	0	0	0	0	0.253156
0.0560226	1.19508	0.150717	0.555113	0.0311641	0.000789963	0.0260841	-0.0256017	0.372102	0.106854	0.0285709	0.0259168	0.00576314	0.012767	0.0248348	0.00861843	0.00549582	0.0253328	0.0446288	0.00934162	0.0240352	0.0485209	0.0273283	0.00672888	0.0133705	0.0519596	0.0577614	0.101888	0.00196637	0.00489752	0.0327622	0.225236	0	0	0	0	0.253364
0.0561155	1.19666	0.151589	0.547741	0.0305733	0.000916198	0.0263954	-0.0257177	0.373534	0.106503	0.0290405	0.0259168	0.00576314	0.012767	0.0248348	0.00861843	0.00549582	0.0253328	0.0446288	0.00934162	0.0240352	0.0485209	0.0273283	0.00672888	0.0133705	0.0519596	0.0577614	0.101888	0.00196637	0.00489752	0.0327622	0.225236	0	0	0	0	0.253545
0.0560643	1.1985	0.152548	0.539746	0.029916	0.00105187	0.0267314	-0.0258493	0.37513	0.106136	0.029549	0.0259168	0.00576314	0.012767	0.0248348	0.00861843	0.00549582	0.0253328	0.0446288	0.00934162	0.0240352	0.0485209	0.0273283	0.00672888	0.0133705	0.0519596	0.0577614	0.101888	0.00196637	0.00489752	0.0327622	0.225236	0	0	0	0	0.253686
0.0560429	1.20034	0.153486	0.532055	0.0292926	0.00118334	0.0270511	-0.0259771	0.376681	0.105793	0.0300422	0.0259168	0.00576314	0.012767	0.0248348	0.00861843	0.00549582	0.0253328	0.0446288	0.00934162	0.0240352	0.0485209	0.0273283	0.00672888	0.0133705	0.0519596	0.0577614	0.101888	0.00196637	0.00489752	0.0327622	0.225236	0	0	0	0	0.253793
0.0561987	1.20197	0.154312	0.525445	0.0287852	0.00129901	0.0273204	-0.0260854	0.378017	0.105505	0.0304745	0.0259168	0.00576314	0.012767	0.0248348	0.00861843	0.00549582	0.0253328	0.0446288	0.00934162	0.0240352	0.0485209	0.0273283	0.00672888	0.0133705	0.0519596	0.0577614	0.101888	0.00196637	0.00489752	0.0327622	0.225236	0	0	0	0	0.253866
0.0560246	1.20411	0.15534	0.517255	0.0281108	0.00143853	0.027656	-0.026229	0.379729	0.105163	0.0310026	0.0259168	0.00576314	0.012767	0.0248348	0.00861843	0.00549582	0.0253328	0.0446288	0.00934162	0.0240352	0.0485209	0.0273283	0.00672888	0.0133705	0.0519596	0.0577614	0.101888	0.00196637	0.00489752	0.0327622	0.225236	0	0	0	0	0.253896
0.0559076	1.20622	0.15633	0.509522	0.0274866	0.00157157	0.0279683	-0.0263659	0.381366	0.104851	0.0315066	0.0259168	0.00576314	0.012767	0.0248348	0.00861843	0.00549582	0.0253328	0.0446288	0.00934162	0.0240352	0.0485209	0.0273283	0.00672888	0.0133705	0.0519596	0.0577614	0.101888	0.00196637	0.00489752	0.0327622	0.225236	0	0	0	0	0.253887
0.05596	1.20814	0.157211	0.502839	0.0269737	0.00168916	0.0282314	-0.0264844	0.382797	0.104595	0.0319513	0.0259168	0.00576314	0.012767	0.0248348	0.00861843	0.00549582	0.0253328	0.0446288	0.00934162	0.0240352	0.0485209	0.0273283	0.00672888	0.0133705	0.0519596	0.0577614	0.101888	0.00196637	0.00489752	0.0327622	0.225236	0	0	0	0	0.253841
0.0560849	1.21	0.158045	0.496692	0.026517	0.0017989	0.028468	-0.0265951	0.384138	0.104373	0.0323669	0.0259168	0.00576314	0.012767	0.0248348	0.00861843	0.00549582	0.0253328	0.0446288	0.00934162	0.0240352	0.0485209	0.0273283	0.00672888	0.0133705	0.0519596	0.0577614	0.101888	0.00196637	0.00489752	0.0327622	0.225236	0	0	0	0	0.253755
0.0562175	1.21191	0.158872	0.490743	0.0260808	0.00190587	0.0286928	-0.026705	0.385463	0.104171	0.0327734	0.0259168	0.00576314	0.012767	0.0248348	0.00861843	0.00549582	0.0253328	0.0446288	0.00934162	0.0240352	0.0485209	0.0273283	0.00672888	0.0133705	0.0519596	0.0577614	0.101888	0.00196637	0.00489752	0.0327622	0.225236	0	0	0	0	0.253627
0.0565714	1.21357	0.159562	0.486071	0.0257757	0.00199359	0.0288589	-0.0267922	0.386535	0.104035	0.0331062	0.0259168	0.00576314	0.012767	0.0248348	0.00861843	0.00549582	0.0253328	0.0446288	0.00934162	0.0240352	0.0485209	0.0273283	0.00672888	0.0133705	0.0519596	0.0577614	0.101888	0.00196637	0.00489752	0.0327622	0.225236	0	0	0	0	0.253461
0.0565805	1.21576	0.16046	0.479815	0.0253077	0.0021057	0.0290904	-0.0269149	0.387988	0.103846	0.0335367	0.0259168	0.00576314	0.012767	0.0248348	0.00861843	0.00549582	0.0253328	0.0446288	0.00934162	0.0240352	0.0485209	0.0273283	0.00672888	0.0133705	0.0519596	0.0577614	0.101888	0.00196637	0.00489752	0.0327622	0.225236	0	0	0	0	0.253244
0.0565381	1.21808	0.161386	0.473478	0.0248325	0.00221937	0.0293216	-0.0270425	0.38949	0.103668	0.0339753	0.0259168	0.00576314	0.012767	0.0248348	0.00861843	0.00549582	0.0253328	0.0446288	0.00934162	0.0240352	0.0485209	0.0273283	0.00672888	0.0133705	0.0519596	0.0577614	0.101888	0.00196637	0.00489752	0.0327622	0.225236	0	0	0	0	0.25298
0.0565459	1.22038	0.162279	0.467572	0.0244018	0.00232677	0.0295307	-0.027165	0.390927	0.10352	0.0343912	0.0259168	0.00576314	0.012767	0.0248348	0.00861843	0.00549582	0.0253328	0.0446288	0.00934162	0.0240352	0.0485209	0.0273283	0.00672888	0.0133705	0.0519596	0.0577614	0.101888	0.00196637	0.00489752	0.0327622	0.225236	0	0	0	0	0.252671
0.0565799	1.22271	0.163154	0.461977	0.0240032	0.00242968	0.0297226	-0.0272847	0.392328	0.1034	0.0347915	0.0259168	0.00576314	0.012767	0.0248348	0.00861843	0.00549582	0.0253328	0.0446288	0.00934162	0.0240352	0.0485209	0.0273283	0.00672888	0.0133705	0.0519596	0.0577614	0.101888	0.00196637	0.00489752	0.0327622	0.225236	0	0	0	0	0.252315
0.0566489	1.22506	0.164004	0.456735	0.0236405	0.00252743	0.0298956	-0.0274009	0.393684	0.103308	0.0351736	0.0259168	0.00576314	0.012767	0.0248348	0.00861843	0.00549582	0.0253328	0.0446288	0.00934162	0.0240352	0.0485209	0.0273283	0.00672888	0.0133705	0.0519596	0.0577614	0.101888	0.00196637	0.00489752	0.0327622	0.225236	0	0	0	0	0.251913
0.0566794	1.22751	0.164875	0.451493	0.0232783	0.00262552	0.0300647	-0.0275209	0.395073	0.10323	0.0355592	0.0259168	0.00576314	0.012767	0.0248348	0.00861843	0.00549582	0.0253328	0.0446288	0.00934162	0.0240352	0.0485209	0.0273283	0.00672888	0.0133705	0.0519596	0.0577614	0.101888	0.00196637	0.00489752	0.0327622	0.225236	0	0	0	0	0.25146
0.056436	1.23042	0.165906	0.445133	0.0228068	0.00274147	0.0302767	-0.0276675	0.39675	0.103125	0.0360171	0.0259168	0.00576314	0.012767	0.0248348	0.00861843	0.00549582	0.0253328	0.0446288	0.00934162	0.0240352	0.0485209	0.0273283	0.00672888	0.0133705	0.0519596	0.0577614	0.101888	0.00196637	0.00489752	0.0327622	0.225236	0	0	0	0	0.250941
0.0563097	1.23323	0.166865	0.439543	0.0224129	0.00284584	0.0304517	-0.0278026	0.398291	0.103067	0.0364318	0.0259168	0.00576314	0.012767	0.0248348	0.00861843	0.00549582	0.0253328	0.0446288	0.00934162	0.0240352	0.0485209	0.0273283	0.00672888	0.0133705	0.0519596	0.0577614	0.101888	0.00196637	0.00489752	0.0327622	0.225236	0	0	0	0	0.250373
0.0562261	1.23605	0.167794	0.434366	0.0220609	0.00294414	0.0306049	-0.0279334	0.399777	0.103041	0.036825	0.0259168	0.00576314	0.012767	0.0248348	0.00861843	0.00549582	0.0253328	0.0446288	0.00934162	0.0240352	0.0485209	0.0273283	0.00672888	0.0133705	0.0519596	0.0577614	0.101888	0.00196637	0.00489752	0.0327622	0.225236	0	0	0	0	0.249754
0.0561147	1.23897	0.168737	0.42927	0.0217182	0.00304161	0.0307499	-0.0280668	0.401285	0.103035	0.0372175	0.0259168	0.00576314	0.012767	0.0248348	0.00861843	0.00549582	0.0253328	0.0446288	0.00934162	0.0240352	0.0485209	0.0273283	0.00672888	0.0133705	0.0519596	0.0577614	0.101888	0.00196637	0.00489752	0.0327622	0.225236	0	0	0	0	0.249076
0.0562602	1.2416	0.169523	0.425588	0.0215131	0.00311706	0.0308318	-0.0281754	0.402509	0.103098	0.0375258	0.0259168	0.00576314	0.012767	0.0248348	0.00861843	0.00549582	0.0253328	0.0446288	0.00934162	0.0240352	0.0485209	0.0273283	0.00672888	0.0133705	0.0519596	0.0577614	0.101888	0.00196637	0.00489752	0.0327622	0.225236	0	0	0	0	0.248364
0.0559042	1.24504	0.170607	0.419795	0.0211063	0.00322657	0.0309955	-0.0283325	0.404261	0.103104	0.0379707	0.0259168	0.00576314	0.012767	0.0248348	0.00861843	0.00549582	0.0253328	0.0446288	0.00934162	0.0240352	0.0485209	0.0273283	0.00672888	0.0133705	0.0519596	0.0577614	0.101888	0.00196637	0.00489752	0.0327622	0.225236	0	0	0	0	0.247546
0.0556437	1.24842	0.171631	0.41468	0.0207669	0.00332588	0.0311258	-0.0284804	0.405903	0.103155	0.0383782	0.0259168	0.00576314	0.012767	0.0248348	0.00861843	0.00549582	0.0253328	0.0446288	0.00934162	0.0240352	0.0485209	0.0273283	0.00672888	0.0133705	0.0519596	0.0577614	0.101888	0.00196637	0.00489752	0.0327622	0.225236	0	0	0	0	0.246672
0.0558131	1.25123	0.172391	0.411768	0.0206382	0.00339027	0.0311615	-0.0285867	0.407074	0.1033	0.0386509	0.0259168	0.00576314	0.012767	0.0248348	0.00861843	0.00549582	0.0253328	0.0446288	0.00934162	0.0240352	0.0485209	0.0273283	0.00672888	0.0133705	0.0519596	0.0577614	0.101888	0.00196637	0.00489752	0.0327622	0.225236	0	0	0	0	0.24579
0.0562557	1.2537	0.172985	0.410262	0.0206419	0.00343227	0.0311364	-0.0286676	0.407954	0.103508	0.0388378	0.0259168	0.00576314	0.012767	0.0248348	0.00861843	0.00549582	0.0253328	0.0446288	0.00934162	0.0240352	0.0485209	0.0273283	0.00672888	0.0133705	0.0519596	0.0577614	0.101888	0.00196637	0.00489752	0.0327622	0.225236	0	0	0	0	0.244891
0.056609	1.25638	0.173634	0.408515	0.0206219	0.00347839	0.0311167	-0.0287579	0.408929	0.103725	0.0390436	0.0259168	0.00576314	0.012767	0.0248348	0.00861843	0.00549582	0.0253328	0.0446288	0.00934162	0.0240352	0.0485209	0.0273283	0.00672888	0.0133705	0.0519596	0.0577614	0.101888	0.00196637	0.00489752	0.0327622	0.225236	0	0	0	0	0.243928
0.0567785	1.25941	0.17439	0.406164	0.0205454	0.00353464	0.0311163	-0.028866	0.410091	0.103941	0.0392921	0.0259168	0.00576314	0.012767	0.0248348	0.00861843	0.00549582	0.0253328	0.0446288	0.00934162	0.0240352	0.0485209	0.0273283	0.00672888	0.0133705	0.0519596	0.0577614	0.101888	0.00196637	0.00489752	0.0327622	0.225236	0	0	0	0	0.242881
0.0569839	1.26247	0.175122	0.404166	0.0205019	0.00358551	0.0310971	-0.0289712	0.411211	0.104186	0.0395221	0.0259168	0.00576314	0.012767	0.0248348	0.00861843	0.00549582	0.0253328	0.0446288	0.00934162	0.0240352	0.0485209	0.0273283	0.00672888	0.0133705	0.0519596	0.0577614	0.101888	0.00196637	0.00489752	0.0327622	0.225236	0	0	0	0	0.241783
0.0569202	1.26601	0.176006	0.401289	0.0203782	0.00365128	0.0311063	-0.0291012	0.412595	0.104428	0.0398141	0.0259168	0.00576314	0.012767	0.0248348	0.00861843	0.00549582	0.0253328	0.0446288	0.00934162	0.0240352	0.0485209	0.0273283	0.00672888	0.0133705	0.0519596	0.0577614	0.101888	0.00196637	0.00489752	0.0327622	0.225236	0	0	0	0	0.240574
0.0569081	1.26956	0.176858	0.398863	0.0202974	0.00371016	0.0310921	-0.0292268	0.413919	0.104704	0.040082	0.0259168	0.00576314	0.012767	0.0248348	0.00861843	0.00549582	0.0253328	0.0446288	0.00934162	0.0240352	0.0485209	0.0273283	0.00672888	0.0133705	0.0519596	0.0577614	0.101888	0.00196637	0.00489752	0.0327622	0.225236	0	0	0	0	0.239309
0.0567833	1.27273	0.177767	0.395192	0.0201777	0.00379427	0.0311438	-0.0293438	0.415268	0.104841	0.0404256	0.0259168	0.00576314	0.012767	0.0248348	0.00861843	0.00549582	0.0253328	0.0446288	0.00934162	0.0240352	0.0485209	0.0273283	0.00672888	0.0133705	0.0519596	0.0577614	0.101888	0.00196637	0.00489752	0.0327622	0.225236	0	0	0	0	0.238365
0.0566233	1.26808	0.178663	0.378537	0.0197845	0.00414376	0.0319948	-0.0292284	0.415658	0.103035	0.041481	0.0259168	0.00576314	0.012767	0.0248348	0.00861843	0.00549582	0.0253328	0.0446288	0.00934162	0.0240352	0.0485209	0.0273283	0.00672888	0.0133705	0.0519596	0.0577614	0.101888	0.00196637	0.00489752	0.0327622	0.225236	0	0	0	0	0.242504
0.0568094	1.26062	0.179349	0.359586	0.0194447	0.00454589	0.0330209	-0.0290134	0.415412	0.100709	0.0426467	0.0259168	0.00576314	0.012767	0.0248348	0.00861843	0.00549582	0.0253328	0.0446288	0.00934162	0.0240352	0.0485209	0.0273283	0.00672888	0.0133705	0.0519596	0.0577614	0.101888	0.00196637	0.00489752	0.0327622	0.225236	0	0	0	0	0.24818
0.0567635	1.25354	0.180166	0.339832	0.0190402	0.00496223	0.0340742	-0.0288179	0.415383	0.0983698	0.0438694	0.0259168	0.00576314	0.012767	0.0248348	0.00861843	0.00549582	0.0253328	0.0446288	0.00934162	0.0240352	0.0485209	0.0273283	0.00672888	0.0133705	0.0519596	0.0577614	0.101888	0.00196637	0.00489752	0.0327622	0.225236	0	0	0	0	0.253786
0.056784	1.24645	0.180942	0.320556	0.0186754	0.00537072	0.0351039	-0.0286179	0.415289	0.0960656	0.0450644	0.0259168	0.00576314	0.012767	0.0248348	0.00861843	0.00549582	0.0253328	0.0446288	0.00934162	0.0240352	0.0485209	0.0273283	0.00672888	0.0133705	0.0519596	0.0577614	0.101888	0.00196637	0.00489752	0.0327622	0.225236	0	0	0	0	0.25934
0.0568461	1.23941	0.181692	0.30169	0.0183414	0.00577234	0.036112	-0.0284161	0.415157	0.0937984	0.0462368	0.0259168	0.00576314	0.012767	0.0248348	0.00861843	0.00549582	0.0253328	0.0446288	0.00934162	0.0240352	0.0485209	0.0273283	0.00672888	0.0133705	0.0519596	0.0577614	0.101888	0.00196637	0.00489752	0.0327622	0.225236	0	0	0	0	0.264824
0.0566132	1.23267	0.182607	0.281546	0.0179256	0.00619775	0.0371704	-0.028233	0.415272	0.0914747	0.0474963	0.0259168	0.00576314	0.012767	0.0248348	0.00861843	0.00549582	0.0253328	0.0446288	0.00934162	0.0240352	0.0485209	0.0273283	0.00672888	0.0133705	0.0519596	0.0577614	0.101888	0.00196637	0.00489752	0.0327622	0.225236	0	0	0	0	0.27033
0.0562698	1.22602	0.183581	0.260938	0.0174916	0.00663275	0.038246	-0.0280549	0.415468	0.0891288	0.0487898	0.0259168	0.00576314	0.012767	0.0248348	0.00861843	0.00549582	0.0253328	0.0446288	0.00934162	0.0240352	0.0485209	0.0273283	0.00672888	0.0133705	0.0519596	0.0577614	0.101888	0.00196637	0.00489752	0.0327622	0.225236	0	0	0	0	0.275853
0.0557833	1.21945	0.184637	0.239622	0.0170286	0.00708221	0.0393503	-0.0278823	0.415767	0.0867406	0.050133	0.0259168	0.00576314	0.012767	0.0248348	0.00861843	0.00549582	0.0253328	0.0446288	0.00934162	0.0240352	0.0485209	0.0273283	0.00672888	0.0133705	0.0519596	0.0577614	0.101888	0.00196637	0.00489752	0.0327622	0.225236	0	0	0	0	0.28143
0.0556459	1.21277	0.18549	0.220418	0.0167033	0.0074935	0.0403583	-0.0276913	0.415771	0.0844956	0.0513437	0.0259168	0.00576314	0.012767	0.0248348	0.00861843	0.00549582	0.0253328	0.0446288	0.00934162	0.0240352	0.0485209	0.0273283	0.00672888	0.0133705	0.0519596	0.0577614	0.101888	0.00196637	0.00489752	0.0327622	0.225236	0	0	0	0	0.286802
0.0554064	1.2062	0.186401	0.200826	0.0163639	0.00791299	0.0413793	-0.0275055	0.415851	0.0822364	0.052584	0.0259168	0.00576314	0.012767	0.0248348	0.00861843	0.00549582	0.0253328	0.0446288	0.00934162	0.0240352	0.0485209	0.0273283	0.00672888	0.0133705	0.0519596	0.0577614	0.101888	0.00196637	0.00489752	0.0327622	0.225236	0	0	0	0	0.292173
0.0555662	1.19968	0.187078	0.183937	0.0161768	0.00828201	0.0422736	-0.0273054	0.415623	0.0801848	0.0536547	0.0259168	0.00576314	0.012767	0.0248348	0.00861843	0.00549582	0.0253328	0.0446288	0.00934162	0.0240352	0.0485209	0.0273283	0.00672888	0.0133705	0.0519596	0.0577614	0.101888	0.00196637	0.00489752	0.0327622	0.225236	0	0	0	0	0.297191
0.0556674	1.19335	0.187788	0.16703	0.0159888	0.00865179	0.0431627	-0.0271114	0.415451	0.0781549	0.0547316	0.0259168	0.00576314	0.012767	0.0248348	0.00861843	0.00549582	0.0253328	0.0446288	0.00934162	0.0240352	0.0485209	0.0273283	0.00672888	0.0133705	0.0519596	0.0577614	0.101888	0.00196637	0.00489752	0.0327622	0.225236	0	0	0	0	0.302132
0.0559233	1.18722	0.188408	0.151462	0.0158679	0.00899623	0.0439844	-0.0269169	0.41518	0.0762495	0.0557274	0.0259168	0.00576314	0.012767	0.0248348	0.00861843	0.00549582	0.0253328	0.0446288	0.00934162	0.0240352	0.0485209	0.0273283	0.00672888	0.0133705	0.0519596	0.0577614	0.101888	0.00196637	0.00489752	0.0327622	0.225236	0	0	0	0	0.306821
0.0560329	1.18126	0.189111	0.135336	0.0157192	0.00935188	0.0448255	-0.0267312	0.415028	0.0743254	0.0567644	0.0259168	0.00576314	0.012767	0.0248348	0.00861843	0.00549582	0.0253328	0.0446288	0.00934162	0.0240352	0.0485209	0.0273283	0.00672888	0.0133705	0.0519596	0.0577614	0.101888	0.00196637	0.00489752	0.0327622	0.225236	0	0	0	0	0.311501
0.056039	1.17545	0.18987	0.118903	0.0155586	0.00971412	0.0456749	-0.0265518	0.414956	0.0723984	0.0578266	0.0259168	0.00576314	0.012767	0.0248348	0.00861843	0.00549582	0.0253328	0.0446288	0.00934162	0.0240352	0.0485209	0.0273283	0.00672888	0.0133705	0.0519596	0.0577614	0.101888	0.00196637	0.00489752	0.0327622	0.225236	0	0	0	0	0.316151
0.0559934	1.16981	0.190656	0.10249	0.0154033	0.0100767	0.0465175	-0.0263769	0.414927	0.0704932	0.0588929	0.0259168	0.00576314	0.012767	0.0248348	0.00861843	0.00549582	0.0253328	0.0446288	0.00934162	0.0240352	0.0485209	0.0273283	0.00672888	0.0133705	0.0519596	0.0577614	0.101888	0.00196637	0.00489752	0.0327622	0.225236	0	0	0	0	0.320731
0.0560086	1.16437	0.191406	0.0868609	0.0152874	0.0104247	0.0473175	-0.026205	0.414869	0.068673	0.0599144	0.0259168	0.00576314	0.012767	0.0248348	0.00861843	0.00549582	0.0253328	0.0446288	0.00934162	0.0240352	0.0485209	0.0273283	0.00672888	0.0133705	0.0519596	0.0577614	0.101888	0.00196637	0.00489752	0.0327622	0.225236	0	0	0	0	0.325122
0.0557808	1.15899	0.192288	0.0699549	0.0151237	0.0107989	0.0481714	-0.0260397	0.414969	0.0667658	0.0610241	0.0259168	0.00576314	0.012767	0.0248348	0.00861843	0.00549582	0.0253328	0.0446288	0.00934162	0.0240352	0.0485209	0.0273283	0.00672888	0.0133705	0.0519596	0.0577614	0.101888	0.00196637	0.00489752	0.0327622	0.225236	0	0	0	0	0.329648
0.0558021	1.15395	0.193031	0.0551613	0.0150539	0.0111321	0.0489198	-0.0258758	0.414927	0.0650577	0.0620036	0.0259168	0.00576314	0.012767	0.0248348	0.00861843	0.00549582	0.0253328	0.0446288	0.00934162	0.0240352	0.0485209	0.0273283	0.00672888	0.0133705	0.0519596	0.0577614	0.101888	0.00196637	0.00489752	0.0327622	0.225236	0	0	0	0	0.333763
0.0556263	1.14897	0.193881	0.039403	0.0149523	0.0114856	0.0497073	-0.0257176	0.415013	0.0632882	0.0630516	0.0259168	0.00576314	0.012767	0.0248348	0.00861843	0.00549582	0.0253328	0.0446288	0.00934162	0.0240352	0.0485209	0.0273283	0.00672888	0.0133705	0.0519596	0.0577614	0.101888	0.00196637	0.00489752	0.0327622	0.225236	0	0	0	0	0.337967
0.0557737	1.14447	0.194549	0.0263697	0.0149616	0.0117853	0.0503592	-0.0255632	0.414928	0.0617781	0.0639299	0.0259168	0.00576314	0.012767	0.0248348	0.00861843	0.00549582	0.0253328	0.0446288	0.00934162	0.0240352	0.0485209	0.0273283	0.00672888	0.0133705	0.0519596	0.0577614	0.101888	0.00196637	0.00489752	0.0327622	0.225236	0	0	0	0	0.34163
0.0556011	1.13993	0.195393	0.0115106	0.0149087	0.0121228	0.0510908	-0.0254143	0.415037	0.0601311	0.0649329	0.0259168	0.00576314	0.012767	0.0248348	0.00861843	0.00549582	0.0253328	0.0446288	0.00934162	0.0240352	0.0485209	0.0273283	0.00672888	0.0133705	0.0519596	0.0577614	0.101888	0.00196637	0.00489752	0.0327622	0.225236	0	0	0	0	0.345532
0.0556121	1.13579	0.196134	-0.00156574	0.0149278	0.0124253	0.0517307	-0.0252709	0.41506	0.0586653	0.0658273	0.0259168	0.00576314	0.012767	0.0248348	0.00861843	0.00549582	0.0253328	0.0446288	0.00934162	0.0240352	0.0485209	0.0273283	0.00672888	0.0133705	0.0519596	0.0577614	0.101888	0.00196637	0.00489752	0.0327622	0.225236	0	0	0	0	0.348915
0.055729	1.13201	0.196815	-0.0133883	0.0149962	0.0127032	0.0523038	-0.0251341	0.415047	0.0573367	0.066647	0.0259168	0.00576314	0.012767	0.0248348	0.00861843	0.00549582	0.0253328	0.0446288	0.00934162	0.0240352	0.0485209	0.0273283	0.00672888	0.0133705	0.0519596	0.0577614	0.101888	0.00196637	0.00489752	0.0327622	0.225236	0	0	0	0	0.351163
0.0557836	1.12843	0.197529	-0.0251587	0.0150719	0.0129811	0.0528669	-0.0250035	0.415088	0.0560388	0.0674704	0.0259168	0.00576314	0.012767	0.0248348	0.00861843	0.00549582	0.0253328	0.0446288	0.00934162	0.0240352	0.0485209	0.0273283	0.00672888	0.0133705	0.0519596	0.0577614	0.101888	0.00196637	0.00489752	0.0327622	0.225236	0	0	0	0	0.353306
0.0555557	1.12483	0.198395	-0.0384667	0.0151062	0.0132917	0.0534955	-0.0248763	0.415289	0.0546267	0.0684017	0.0259168	0.00576314	0.012767	0.0248348	0.00861843	0.00549582	0.0253328	0.0446288	0.00934162	0.0240352	0.0485209	0.0273283	0.00672888	0.0133705	0.0519596	0.0577614	0.101888	0.00196637	0.00489752	0.0327622	0.225236	0	0	0	0	0.355512
0.0554679	1.12165	0.199182	-0.0502296	0.0151995	0.0135719	0.0540428	-0.0247567	0.415439	0.0533806	0.06924	0.0259168	0.00576314	0.012767	0.0248348	0.00861843	0.00549582	0.0253328	0.0446288	0.00934162	0.0240352	0.0485209	0.0273283	0.00672888	0.0133705	0.0519596	0.0577614	0.101888	0.00196637	0.00489752	0.0327622	0.225236	0	0	0	0	0.35746
0.0553643	1.11873	0.199977	-0.0615634	0.0153157	0.0138446	0.0545614	-0.0246435	0.415618	0.0522003	0.0700584	0.0259168	0.00576314	0.012767	0.0248348	0.00861843	0.00549582	0.0253328	0.0446288	0.00934162	0.0240352	0.0485209	0.0273283	0.00672888	0.0133705	0.0519596	0.0577614	0.101888	0.00196637	0.00489752	0.0327622	0.225236	0	0	0	0	0.359264
0.0553385	1.11619	0.200728	-0.0717638	0.015475	0.0140951	0.0550179	-0.0245384	0.415781	0.0511517	0.0708106	0.0259168	0.00576314	0.012767	0.0248348	0.00861843	0.00549582	0.0253328	0.0446288	0.00934162	0.0240352	0.0485209	0.0273283	0.00672888	0.0133705	0.0519596	0.0577614	0.101888	0.00196637	0.00489752	0.0327622	0.225236	0	0	0	0	0.360847
0.0553956	1.11405	0.201431	-0.0807828	0.0156766	0.0143222	0.0554097	-0.0244422	0.415931	0.0502405	0.0714934	0.0259168	0.00576314	0.012767	0.0248348	0.00861843	0.00549582	0.0253328	0.0446288	0.00934162	0.0240352	0.0485209	0.0273283	0.00672888	0.0133705	0.0519596	0.0577614	0.101888	0.00196637	0.00489752	0.0327622	0.225236	0	0	0	0	0.362203
0.0554051	1.11218	0.20216	-0.0895587	0.0158942	0.0145457	0.0557812	-0.0243529	0.41613	0.049381	0.0721689	0.0259168	0.00576314	0.012767	0.0248348	0.00861843	0.00549582	0.0253328	0.0446288	0.00934162	0.0240352	0.0485209	0.0273283	0.00672888	0.0133705	0.0519596	0.0577614	0.101888	0.00196637	0.00489752	0.0327622	0.225236	0	0	0	0	0.363429
0.055468	1.11068	0.202858	-0.0973476	0.0161474	0.0147497	0.056097	-0.0242726	0.416332	0.0486428	0.0727877	0.0259168	0.00576314	0.012767	0.0248348	0.00861843	0.00549582	0.0253328	0.0446288	0.00934162	0.0240352	0.0485209	0.0273283	0.00672888	0.0133705	0.0519596	0.0577614	0.101888	0.00196637	0.00489752	0.0327622	0.225236	0	0	0	0	0.364446
0.0554978	1.10949	0.203573	-0.10476	0.0164202	0.0149473	0.0563858	-0.0242001	0.416577	0.0479702	0.0733908	0.0259168	0.00576314	0.012767	0.0248348	0.00861843	0.00549582	0.0253328	0.0446288	0.00934162	0.0240352	0.0485209	0.0273283	0.00672888	0.0133705	0.0519596	0.0577614	0.101888	0.00196637	0.00489752	0.0327622	0.225236	0	0	0	0	0.365316
0.0554236	1.10852	0.204342	-0.112273	0.0167029	0.0151487	0.0566695	-0.0241339	0.416895	0.04732	0.0740104	0.0259168	0.00576314	0.012767	0.0248348	0.00861843	0.00549582	0.0253328	0.0446288	0.00934162	0.0240352	0.0485209	0.0273283	0.00672888	0.0133705	0.0519596	0.0577614	0.101888	0.00196637	0.00489752	0.0327622	0.225236	0	0	0	0	0.36609
0.0553978	1.10795	0.205084	-0.11879	0.0170214	0.0153306	0.0568963	-0.0240775	0.417223	0.0467945	0.0745735	0.0259168	0.00576314	0.012767	0.0248348	0.00861843	0.00549582	0.0253328	0.0446288	0.00934162	0.0240352	0.0485209	0.0273283	0.00672888	0.0133705	0.0519596	0.0577614	0.101888	0.00196637	0.00489752	0.0327622	0.225236	0	0	0	0	0.366649
0.0554814	1.10786	0.205766	-0.123886	0.0173833	0.0154837	0.0570467	-0.0240324	0.417537	0.0464334	0.0750511	0.0259168	0.00576314	0.012767	0.0248348	0.00861843	0.00549582	0.0253328	0.0446288	0.00934162	0.0240352	0.0485209	0.0273283	0.00672888	0.0133705	0.0519596	0.0577614	0.101888	0.00196637	0.00489752	0.0327622	0.225236	0	0	0	0	0.366944
0.0554774	1.10804	0.206494	-0.128913	0.01776	0.0156372	0.0571832	-0.0239947	0.417919	0.046113	0.0755348	0.0259168	0.00576314	0.012767	0.0248348	0.00861843	0.00549582	0.0253328	0.0446288	0.00934162	0.0240352	0.0485209	0.0273283	0.00672888	0.0133705	0.0519596	0.0577614	0.101888	0.00196637	0.00489752	0.0327622	0.225236	0	0	0	0	0.367119
0.0554241	1.10855	0.207246	-0.133575	0.0181591	0.0157848	0.0572915	-0.0239655	0.418355	0.0458619	0.0760052	0.0259168	0.00576314	0.012767	0.0248348	0.00861843	0.00549582	0.0253328	0.0446288	0.00934162	0.0240352	0.0485209	0.0273283	0.00672888	0.0133705	0.0519596	0.0577614	0.101888	0.00196637	0.00489752	0.0327622	0.225236	0	0	0	0	0.367139
0.0555406	1.10962	0.207908	-0.136406	0.0186061	0.0158944	0.0573044	-0.0239497	0.418756	0.0458142	0.0763617	0.0259168	0.00576314	0.012767	0.0248348	0.00861843	0.00549582	0.0253328	0.0446288	0.00934162	0.0240352	0.0485209	0.0273283	0.00672888	0.0133705	0.0519596	0.0577614	0.101888	0.00196637	0.00489752	0.0327622	0.225236	0	0	0	0	0.36685
0.0562046	1.11153	0.208287	-0.13509	0.0191312	0.0159146	0.0571183	-0.0239548	0.418979	0.0461764	0.0764419	0.0259168	0.00576314	0.012767	0.0248348	0.00861843	0.00549582	0.0253328	0.0446288	0.00934162	0.0240352	0.0485209	0.0273283	0.00672888	0.0133705	0.0519596	0.0577614	0.101888	0.00196637	0.00489752	0.0327622	0.225236	0	0	0	0	0.366023
0.0566212	1.11357	0.208798	-0.134796	0.0196493	0.0159587	0.0569684	-0.0239645	0.41934	0.046481	0.0766028	0.0259168	0.00576314	0.012767	0.0248348	0.00861843	0.00549582	0.0253328	0.0446288	0.00934162	0.0240352	0.0485209	0.0273283	0.00672888	0.0133705	0.0519596	0.0577614	0.101888	0.00196637	0.00489752	0.0327622	0.225236	0	0	0	0	0.365186
0.0566026	1.11565	0.209528	-0.136458	0.0201567	0.0160484	0.056894	-0.0239761	0.419907	0.04665	0.0769127	0.0259168	0.00576314	0.012767	0.0248348	0.00861843	0.00549582	0.0253328	0.0446288	0.00934162	0.0240352	0.0485209	0.0273283	0.00672888	0.0133705	0.0519596	0.0577614	0.101888	0.00196637	0.00489752	0.0327622	0.225236	0	0	0	0	0.364415
0.0566813	1.11821	0.210209	-0.1368	0.0206999	0.0161111	0.0567477	-0.024	0.420474	0.0469769	0.0771434	0.0259168	0.00576314	0.012767	0.0248348	0.00861843	0.00549582	0.0253328	0.0446288	0.00934162	0.0240352	0.0485209	0.0273283	0.00672888	0.0133705	0.0519596	0.0577614	0.101888	0.00196637	0.00489752	0.0327622	0.225236	0	0	0	0	0.363384
0.0571851	0.68843	0.26006	-6.91243	-0.429895	0.183835	0.578269	-0.23765	2.17247	0.956377	0.575278	0.0259168	0.00576314	0.012767	0.0248348	0.00861843	0.00549582	0.0253328	0.0446288	0.00934162	0.0240352	0.0485209	0.0273283	0.00672888	0.0133705	0.0519596	0.0577614	0.101888	0.00196637	0.00489752	0.0327622	0.225236	0	0	0	0	0.202518
0.0571544	1.14345	0.186384	0.00528841	0.0351558	0.0114788	0.0449269	-0.0243712	0.353073	0.123295	0.0656563	-0.561432	-0.00786316	0.012767	0.00952246	0.00762207	0.00458108	-0.0434685	0.0383322	0.00934162	-0.402001	-0.959939	0.0267058	0.00672888	0.00792429	0.0317074	0.053608	0.100627	0.00196637	0.00489752	-0.878762	0.225236	0	0	0	0	-1.63596
0.0572571	1.14346	0.186442	0.00576165	0.0359358	0.0114242	0.0446393	-0.0241771	0.351048	0.123992	0.0655839	0.00706068	0.00538137	0.0127623	0.0243455	0.00857845	0.00545506	0.0233882	0.04434	0.00931299	0.0107792	0.0166667	0.0273096	0.00672888	0.0132316	0.0514276	0.0576438	0.101849	0.00196637	0.00489752	0.0051709	0.225236	0	0	0	0	0.310978
0.0574878	1.14347	0.186495	0.00621445	0.036689	0.0113743	0.0443801	-0.0239953	0.349243	0.124644	0.0655178	0.00699995	0.00538129	0.0127622	0.024344	0.00857816	0.0054547	0.0233874	0.0443373	0.00931231	0.0107452	0.0165749	0.0273096	0.00672888	0.0132319	0.0514283	0.0576437	0.101849	0.00196637	0.00489752	0.00511667	0.225236	0	11.2789	0.18087	0.390197	-1.05174
0.057836	1.14348	0.186545	0.00664965	0.0374201	0.0113287	0.0441462	-0.0238243	0.347635	0.125257	0.0654572	0.00694411	0.00538122	0.0127621	0.0243426	0.00857789	0.00545436	0.0233866	0.0443348	0.00931168	0.010714	0.0164905	0.0273095	0.00672888	0.0132322	0.051429	0.0576437	0.101849	0.00196637	0.00489752	0.00506681	0.225236	0	0.815611	0.0210915	0.0290743	0.212848
0.0580085	1.14349	0.186601	0.00714026	0.0382479	0.0112768	0.0438771	-0.0236319	0.345764	0.125946	0.0653882	0.00688075	0.00538114	0.012762	0.024341	0.00857758	0.00545398	0.0233858	0.0443319	0.00931096	0.0106786	0.0163947	0.0273095	0.00672888	0.0132325	0.0514298	0.0576436	0.101849	0.00196637	0.00489752	0.00501022	0.225236	0	0.814664	0.0216467	0.0291006	0.213186
0.0581784	1.1435	0.186656	0.00764343	0.0391029	0.0112248	0.0436089	-0.0234372	0.343905	0.126644	0.0653192	0.00681723	0.00538106	0.0127619	0.0243394	0.00857728	0.00545359	0.023385	0.0443291	0.00931025	0.010643	0.0162987	0.0273094	0.00672888	0.0132328	0.0514305	0.0576435	0.101849	0.00196637	0.00489752	0.0049535	0.225236	0	0.813703	0.0222002	0.0291263	0.21351
0.0582984	1.14351	0.186714	0.00817124	0.040005	0.0111712	0.0433321	-0.0232349	0.341986	0.127368	0.0652479	0.0067516	0.00538098	0.0127617	0.0243378	0.00857696	0.0054532	0.0233841	0.0443262	0.00930951	0.0106063	0.0161995	0.0273094	0.00672888	0.0132331	0.0514313	0.0576435	0.101848	0.00196637	0.00489752	0.00489489	0.225236	0	0.813387	0.0227703	0.0291748	0.213756
0.0586232	1.14352	0.186765	0.00866007	0.0408502	0.0111248	0.0430975	-0.0230529	0.34039	0.128019	0.0651861	0.0066944	0.00538091	0.0127616	0.0243363	0.00857668	0.00545285	0.0233834	0.0443236	0.00930886	0.0105743	0.016113	0.0273094	0.00672888	0.0132334	0.051432	0.0576434	0.101848	0.00196637	0.00489752	0.00484381	0.225236	0	0.810172	0.0232568	0.029119	0.214269
0.0585124	1.14354	0.186831	0.00927091	0.0419022	0.0110632	0.0427783	-0.0228213	0.338162	0.128848	0.0651044	0.0066192	0.00538082	0.0127615	0.0243344	0.00857632	0.0054524	0.0233824	0.0443202	0.00930801	0.0105323	0.0159993	0.0273093	0.00672888	0.0132338	0.0514329	0.0576434	0.101848	0.00196637	0.00489752	0.00477666	0.225236	0	0.812944	0.0239147	0.0292781	0.21418
0.058661	1.14355	0.186888	0.00982934	0.0428756	0.0110108	0.0425121	-0.0226158	0.336338	0.129582	0.0650346	0.00655469	0.00538073	0.0127614	0.0243328	0.008576	0.00545201	0.0233815	0.0443173	0.00930728	0.0104962	0.0159018	0.0273093	0.00672888	0.0132341	0.0514337	0.0576433	0.101848	0.00196637	0.00489752	0.00471905	0.225236	0	0.812062	0.0244664	0.0293057	0.214431
0.059118	1.14356	0.186934	0.0103221	0.0437479	0.0109691	0.0423069	-0.0224417	0.334976	0.130203	0.0649788	0.00650268	0.00538067	0.0127613	0.0243315	0.00857575	0.00545169	0.0233809	0.044315	0.0093067	0.0104671	0.0158232	0.0273093	0.00672888	0.0132343	0.0514343	0.0576433	0.101848	0.00196637	0.00489752	0.0046726	0.225236	0	0.80689	0.0248833	0.0291779	0.21509
0.0597953	1.14357	0.186973	0.0107722	0.0445565	0.0109346	0.0421429	-0.0222887	0.333926	0.130748	0.0649325	0.00645912	0.00538061	0.0127612	0.0243304	0.00857554	0.00545143	0.0233803	0.044313	0.00930621	0.0104427	0.0157574	0.0273092	0.00672888	0.0132345	0.0514349	0.0576432	0.101848	0.00196637	0.00489752	0.0046337	0.225236	0	0.798753	0.0251738	0.0289408	0.216032
0.060055	1.14358	0.187026	0.0113406	0.045567	0.010886	0.0419006	-0.0220884	0.332294	0.131462	0.0648676	0.0063987	0.00538054	0.0127611	0.0243289	0.00857525	0.00545106	0.0233795	0.0443103	0.00930552	0.010409	0.015666	0.0273092	0.00672888	0.0132348	0.0514356	0.0576432	0.101848	0.00196637	0.00489752	0.00457975	0.225236	0	0.796245	0.0256365	0.0289069	0.2164
0.0610267	1.14358	0.187056	0.0117443	0.0463108	0.0108604	0.0417876	-0.0219605	0.331629	0.131915	0.0648329	0.00636553	0.0053805	0.012761	0.0243281	0.00857509	0.00545086	0.0233791	0.0443088	0.00930515	0.0103904	0.0156159	0.0273092	0.00672888	0.013235	0.051436	0.0576431	0.101848	0.00196637	0.00489752	0.00455013	0.225236	0	0.78446	0.0258077	0.0285356	0.217684
0.0619214	1.14359	0.187089	0.0121825	0.0471175	0.0108314	0.0416566	-0.0218204	0.330831	0.132412	0.0647939	0.00632835	0.00538045	0.012761	0.0243271	0.00857491	0.00545064	0.0233786	0.0443072	0.00930473	0.0103696	0.0155597	0.0273092	0.00672888	0.0132352	0.0514364	0.0576431	0.101848	0.00196637	0.00489752	0.00451692	0.225236	0	0.773975	0.0260237	0.0282107	0.21883
0.0626681	1.1436	0.187128	0.0126713	0.0480141	0.0107973	0.0414971	-0.0216617	0.329823	0.132975	0.0647479	0.00628489	0.0053804	0.0127609	0.024326	0.0085747	0.00545037	0.023378	0.0443052	0.00930424	0.0103453	0.015494	0.0273091	0.00672888	0.0132354	0.051437	0.0576431	0.101848	0.00196637	0.00489752	0.00447812	0.225236	0	0.765559	0.0263143	0.0279604	0.219756
0.063269	1.1436	0.187172	0.0132088	0.0489982	0.0107584	0.0413119	-0.0214855	0.328627	0.133601	0.0646957	0.00623568	0.00538033	0.0127608	0.0243248	0.00857446	0.00545008	0.0233774	0.044303	0.00930369	0.0103178	0.0154196	0.0273091	0.00672888	0.0132356	0.0514376	0.057643	0.101848	0.00196637	0.00489752	0.00443417	0.225236	0	0.759067	0.0266794	0.0277799	0.220476
0.0641341	1.14361	0.187208	0.0136974	0.049906	0.0107268	0.041168	-0.0213319	0.327739	0.134146	0.0646531	0.00619516	0.00538028	0.0127607	0.0243238	0.00857426	0.00544983	0.0233769	0.0443012	0.00930323	0.0102951	0.0153584	0.0273091	0.00672888	0.0132358	0.0514381	0.057643	0.101848	0.00196637	0.00489752	0.00439799	0.225236	0	0.749675	0.0269498	0.0274927	0.221478
0.0648631	1.14362	0.187249	0.0142324	0.0508975	0.0106908	0.0410004	-0.0211619	0.326679	0.134749	0.0646046	0.00614929	0.00538023	0.0127606	0.0243226	0.00857404	0.00544955	0.0233763	0.0442991	0.00930271	0.0102695	0.015289	0.0273091	0.00672888	0.0132361	0.0514386	0.0576429	0.101847	0.00196637	0.00489752	0.00435703	0.225236	0	0.742192	0.0272897	0.0272746	0.222271
0.0657643	1.14363	0.187285	0.0147415	0.0518509	0.0106592	0.040857	-0.0210047	0.325799	0.135305	0.0645619	0.0061085	0.00538017	0.0127605	0.0243216	0.00857384	0.00544931	0.0233757	0.0442973	0.00930225	0.0102466	0.0152274	0.027309	0.00672888	0.0132363	0.0514391	0.0576429	0.101847	0.00196637	0.00489752	0.00432061	0.225236	0	0.732957	0.0274944	0.0269884	0.223233
0.0666733	1.14363	0.187322	0.0152346	0.0527657	0.0106269	0.0407093	-0.020849	0.324883	0.135857	0.0645184	0.00606716	0.00538012	0.0127605	0.0243205	0.00857364	0.00544906	0.0233752	0.0442955	0.00930178	0.0102235	0.0151649	0.027309	0.00672888	0.0132365	0.0514396	0.0576429	0.101847	0.00196637	0.00489752	0.00428369	0.225236	0	0.723947	0.0276729	0.0267082	0.224196
0.067491	1.14364	0.187362	0.0156654	0.053524	0.0105911	0.0405364	-0.0206963	0.323763	0.136401	0.0644704	0.0060222	0.00538007	0.0127604	0.0243194	0.00857343	0.00544879	0.0233746	0.0442934	0.00930128	0.0101984	0.0150969	0.027309	0.00672888	0.0132367	0.0514401	0.0576428	0.101847	0.00196637	0.00489752	0.00424354	0.225236	0	0.716228	0.027887	0.0264742	0.225132
0.0682405	1.14365	0.187404	0.0161125	0.0543088	0.010553	0.0403507	-0.0205366	0.322546	0.136971	0.0644194	0.00597456	0.00538001	0.0127603	0.0243182	0.00857319	0.0054485	0.023374	0.0442913	0.00930074	0.0101717	0.0150249	0.027309	0.00672888	0.0132369	0.0514407	0.0576428	0.101847	0.00196637	0.00489752	0.00420099	0.225236	0	0.709483	0.0281272	0.0262749	0.225971
0.0693079	1.14366	0.187438	0.0164991	0.0549937	0.0105223	0.0402053	-0.020402	0.321622	0.137451	0.0643782	0.00593581	0.00537996	0.0127602	0.0243172	0.00857301	0.00544826	0.0233735	0.0442896	0.0093003	0.0101501	0.0149663	0.0273089	0.00672888	0.0132371	0.0514412	0.0576428	0.101847	0.00196637	0.00489752	0.00416639	0.225236	0	0.69974	0.0282352	0.0259632	0.227122
0.0702206	1.14366	0.187478	0.0169289	0.0557551	0.0104871	0.0400355	-0.0202514	0.320519	0.137987	0.064331	0.00589168	0.0053799	0.0127601	0.0243161	0.00857279	0.005448	0.0233729	0.0442876	0.0092998	0.0101254	0.0148996	0.0273089	0.00672888	0.0132373	0.0514417	0.0576427	0.101847	0.00196637	0.00489752	0.00412698	0.225236	0	0.691892	0.0284055	0.0257203	0.228071
0.0711322	1.14367	0.187517	0.0173681	0.0565355	0.0104513	0.0398625	-0.0200982	0.319391	0.138533	0.0642831	0.00584683	0.00537985	0.0127601	0.024315	0.00857258	0.00544773	0.0233723	0.0442856	0.0092993	0.0101003	0.0148318	0.0273089	0.00672888	0.0132375	0.0514423	0.0576427	0.101847	0.00196637	0.00489752	0.00408693	0.225236	0	0.684337	0.0285755	0.0254871	0.228986
0.072095	1.14368	0.187557	0.0178059	0.0573165	0.0104162	0.0396928	-0.0199467	0.318286	0.139073	0.0642361	0.00580272	0.00537979	0.01276	0.0243139	0.00857236	0.00544746	0.0233717	0.0442836	0.0092988	0.0100756	0.0147651	0.0273089	0.00672888	0.0132377	0.0514428	0.0576426	0.101847	0.00196637	0.00489752	0.00404754	0.225236	0	0.676572	0.0287244	0.0252447	0.22992
0.0729307	1.14369	0.187599	0.0182783	0.0581598	0.0103777	0.039505	-0.0197828	0.317049	0.139657	0.0641845	0.00575454	0.00537973	0.0127599	0.0243127	0.00857213	0.00544717	0.0233711	0.0442814	0.00929826	0.0100487	0.0146923	0.0273088	0.00672888	0.013238	0.0514434	0.0576426	0.101847	0.00196637	0.00489752	0.00400452	0.225236	0	0.670253	0.0289232	0.0250551	0.230696
0.074039	1.14369	0.187636	0.0187057	0.0589288	0.0103446	0.0393464	-0.0196376	0.316021	0.140173	0.0641402	0.00571291	0.00537968	0.0127598	0.0243116	0.00857193	0.00544692	0.0233706	0.0442796	0.00929779	0.0100254	0.0146294	0.0273088	0.00672888	0.0132382	0.0514439	0.0576426	0.101847	0.00196637	0.00489752	0.00396734	0.225236	0	0.661712	0.0290143	0.0247811	0.231707
0.0750034	1.1437	0.187677	0.0191709	0.0597656	0.0103079	0.039168	-0.0194788	0.31485	0.140739	0.064091	0.00566681	0.00537962	0.0127597	0.0243105	0.0085717	0.00544664	0.02337	0.0442775	0.00929727	0.00999959	0.0145597	0.0273088	0.00672888	0.0132384	0.0514444	0.0576425	0.101847	0.00196637	0.00489752	0.00392617	0.225236	0	0.654754	0.0291625	0.0245652	0.232545
0.0761136	1.14371	0.187715	0.0196177	0.0605738	0.0102736	0.0390026	-0.0193281	0.313771	0.141274	0.064045	0.00562365	0.00537957	0.0127596	0.0243094	0.0085715	0.00544638	0.0233694	0.0442756	0.00929678	0.00997546	0.0144945	0.0273088	0.00672888	0.0132386	0.051445	0.0576425	0.101847	0.00196637	0.00489752	0.00388763	0.225236	0	0.646805	0.0292548	0.0243109	0.233487
0.0773114	1.14372	0.187753	0.0200585	0.0613744	0.0102403	0.0388428	-0.0191809	0.312731	0.141798	0.0640004	0.00558178	0.00537951	0.0127596	0.0243083	0.00857129	0.00544612	0.0233689	0.0442737	0.00929631	0.00995203	0.0144312	0.0273087	0.00672888	0.0132388	0.0514455	0.0576424	0.101847	0.00196637	0.00489752	0.00385024	0.225236	0	0.63844	0.0293155	0.0240396	0.234472
0.0785959	1.14372	0.187789	0.0204943	0.062169	0.010208	0.0386879	-0.0190366	0.311724	0.142311	0.063957	0.00554101	0.00537946	0.0127595	0.0243073	0.00857109	0.00544588	0.0233683	0.0442718	0.00929585	0.00992923	0.0143695	0.0273087	0.00672888	0.013239	0.051446	0.0576424	0.101846	0.00196637	0.00489752	0.00381383	0.225236	0	0.629705	0.0293461	0.023753	0.235495
0.0799106	1.14373	0.187825	0.020936	0.0629765	0.0101754	0.0385316	-0.018891	0.310705	0.142829	0.0639133	0.00549995	0.00537941	0.0127594	0.0243063	0.0085709	0.00544563	0.0233678	0.04427	0.00929538	0.00990627	0.0143075	0.0273087	0.00672888	0.0132392	0.0514465	0.0576424	0.101846	0.00196637	0.00489752	0.00377717	0.225236	0	0.621092	0.0293691	0.0234697	0.236502
0.0812828	1.14374	0.187862	0.021379	0.0637889	0.0101431	0.0383764	-0.0187458	0.309694	0.143345	0.0638699	0.00545916	0.00537936	0.0127593	0.0243053	0.0085707	0.00544538	0.0233673	0.0442682	0.00929492	0.00988345	0.0142458	0.0273087	0.00672888	0.0132394	0.051447	0.0576423	0.101846	0.00196637	0.00489752	0.00374074	0.225236	0	0.612399	0.0293751	0.023182	0.237517
0.0825583	1.14374	0.1879	0.0218495	0.0646516	0.0101083	0.0382082	-0.0185912	0.308587	0.143894	0.0638233	0.00541538	0.0053793	0.0127593	0.0243042	0.00857049	0.00544512	0.0233667	0.0442662	0.00929443	0.00985897	0.0141796	0.0273087	0.00672888	0.0132396	0.0514475	0.0576423	0.101846	0.00196637	0.00489752	0.00370165	0.225236	0	0.604773	0.0294198	0.0229334	0.238413
0.0837693	1.14375	0.187941	0.0223411	0.0655535	0.0100718	0.0380307	-0.0184296	0.307415	0.144468	0.0637743	0.00536949	0.00537925	0.0127592	0.024303	0.00857026	0.00544484	0.0233661	0.0442642	0.00929391	0.0098333	0.0141103	0.0273086	0.00672888	0.0132399	0.051448	0.0576423	0.101846	0.00196637	0.00489752	0.00366067	0.225236	0	0.597913	0.0294906	0.0227127	0.239221
0.0847596	1.14376	0.187986	0.0228778	0.0665371	0.0100311	0.0378316	-0.0182522	0.306087	0.145099	0.0637199	0.00531856	0.00537918	0.0127591	0.0243017	0.00857002	0.00544453	0.0233654	0.0442619	0.00929334	0.00980482	0.0140333	0.0273086	0.00672888	0.0132401	0.0514487	0.0576422	0.101846	0.00196637	0.00489752	0.00361519	0.225236	0	0.592858	0.029641	0.0225596	0.239827
0.0858483	1.14377	0.18803	0.0234077	0.0675117	0.00999165	0.0376388	-0.0180786	0.304803	0.145716	0.0636671	0.00526907	0.00537912	0.012759	0.0243005	0.00856978	0.00544423	0.0233648	0.0442597	0.00929278	0.00977713	0.0139585	0.0273086	0.00672888	0.0132404	0.0514493	0.0576422	0.101846	0.00196637	0.00489752	0.00357099	0.225236	0	0.587316	0.0297588	0.0223871	0.240483
0.0864162	1.14378	0.188083	0.0240281	0.0686476	0.00994373	0.0374018	-0.0178725	0.303206	0.146449	0.063603	0.00520926	0.00537905	0.0127589	0.024299	0.00856949	0.00544387	0.023364	0.044257	0.00929211	0.00974368	0.0138681	0.0273085	0.00672888	0.0132407	0.05145	0.0576421	0.101846	0.00196637	0.00489752	0.00351758	0.225236	0	0.585491	0.0300586	0.0223556	0.24072
0.0868956	1.14379	0.188138	0.0246698	0.0698247	0.00989437	0.0371574	-0.01766	0.301558	0.147205	0.063537	0.00514765	0.00537897	0.0127588	0.0242974	0.00856919	0.0054435	0.0233632	0.0442542	0.00929141	0.00970922	0.0137749	0.0273085	0.00672888	0.013241	0.0514507	0.0576421	0.101846	0.00196637	0.00489752	0.00346256	0.225236	0	0.584358	0.0303907	0.0223502	0.240873
0.0876887	1.1438	0.188187	0.02527	0.0709325	0.00984971	0.0369379	-0.0174643	0.300085	0.147901	0.0634772	0.00509172	0.0053789	0.0127587	0.024296	0.00856892	0.00544316	0.0233625	0.0442517	0.00929078	0.00967794	0.0136904	0.0273085	0.00672888	0.0132412	0.0514514	0.057642	0.101846	0.00196637	0.00489752	0.00341262	0.225236	0	0.581219	0.0306144	0.0222676	0.241244
0.0890851	1.14381	0.188228	0.0257858	0.071895	0.0098137	0.0367636	-0.0173007	0.298931	0.148482	0.0634289	0.00504634	0.00537884	0.0127586	0.0242949	0.0085687	0.00544288	0.0233619	0.0442497	0.00929027	0.00965256	0.0136218	0.0273084	0.00672888	0.0132414	0.0514519	0.057642	0.101846	0.00196637	0.00489752	0.00337209	0.225236	0	0.57429	0.0306307	0.022039	0.242036
0.0899099	1.14382	0.188278	0.0263981	0.0730306	0.00976895	0.0365439	-0.017103	0.297456	0.149184	0.063369	0.00499026	0.00537877	0.0127585	0.0242935	0.00856843	0.00544255	0.0233611	0.0442471	0.00928963	0.00962119	0.013537	0.0273084	0.00672888	0.0132417	0.0514526	0.0576419	0.101846	0.00196637	0.00489752	0.00332201	0.225236	0	0.571255	0.0308467	0.021959	0.242386
0.0903394	1.14383	0.188334	0.027078	0.0742891	0.00971844	0.0362944	-0.0168823	0.295772	0.149968	0.0633015	0.0049271	0.00537869	0.0127584	0.0242919	0.00856812	0.00544216	0.0233603	0.0442443	0.00928892	0.00958587	0.0134416	0.0273084	0.00672888	0.013242	0.0514534	0.0576419	0.101846	0.00196637	0.00489752	0.00326561	0.225236	0	0.57083	0.0312002	0.0219789	0.242433
0.0904813	1.14384	0.188394	0.0278091	0.0756425	0.00966387	0.0360242	-0.0166446	0.293943	0.150813	0.0632285	0.00485893	0.00537861	0.0127582	0.0242902	0.00856779	0.00544175	0.0233594	0.0442413	0.00928815	0.00954773	0.0133385	0.0273083	0.00672888	0.0132424	0.0514542	0.0576418	0.101845	0.00196637	0.00489752	0.00320473	0.225236	0	0.572294	0.0316565	0.0220715	0.242258
0.0907657	1.14385	0.188452	0.0285265	0.076976	0.00961133	0.0357648	-0.0164136	0.29219	0.151634	0.0631582	0.00479319	0.00537852	0.0127581	0.0242885	0.00856747	0.00544135	0.0233586	0.0442383	0.00928741	0.00951097	0.0132391	0.0273083	0.00672888	0.0132427	0.051455	0.0576417	0.101845	0.00196637	0.00489752	0.00314603	0.225236	0	0.572922	0.0320668	0.0221318	0.242168
0.0908003	1.14386	0.188514	0.0292902	0.0783961	0.00955533	0.0354878	-0.0161678	0.290316	0.152507	0.0630833	0.00472315	0.00537844	0.012758	0.0242867	0.00856713	0.00544093	0.0233576	0.0442352	0.00928662	0.0094718	0.0131333	0.0273083	0.00672888	0.013243	0.0514559	0.0576417	0.101845	0.00196637	0.00489752	0.00308349	0.225236	0	0.575195	0.0325699	0.0222557	0.241882
0.0908321	1.14388	0.188577	0.0300514	0.0797953	0.00949959	0.0352171	-0.0159195	0.288521	0.153389	0.0630086	0.00465307	0.00537835	0.0127579	0.024285	0.00856679	0.00544051	0.0233567	0.044232	0.00928583	0.0094326	0.0130273	0.0273082	0.00672888	0.0132434	0.0514567	0.0576416	0.101845	0.00196637	0.00489752	0.0030209	0.225236	0	0.57746	0.0330751	0.0223795	0.241561
0.0907954	1.14389	0.18864	0.030823	0.0811989	0.0094432	0.0349479	-0.0156647	0.286774	0.154294	0.0629329	0.00458181	0.00537826	0.0127577	0.0242832	0.00856645	0.00544008	0.0233558	0.0442288	0.00928503	0.00939274	0.0129196	0.0273082	0.00672888	0.0132437	0.0514576	0.0576415	0.101845	0.00196637	0.00489752	0.00295727	0.225236	0	0.580045	0.0336024	0.022516	0.241165
0.0909107	1.1439	0.188701	0.0315834	0.0825899	0.009389	0.0346906	-0.0154167	0.285112	0.155175	0.0628601	0.00451316	0.00537817	0.0127576	0.0242815	0.00856612	0.00543966	0.0233549	0.0442257	0.00928425	0.00935434	0.0128158	0.0273081	0.00672888	0.0132441	0.0514584	0.0576415	0.101845	0.00196637	0.00489752	0.00289596	0.225236	0	0.581544	0.0340698	0.0226105	0.240881
0.0910587	1.14391	0.188762	0.0323514	0.0840021	0.00933531	0.0344364	-0.0151687	0.283474	0.156056	0.0627879	0.00444506	0.00537809	0.0127575	0.0242798	0.00856579	0.00543925	0.023354	0.0442227	0.00928348	0.00931625	0.0127129	0.0273081	0.00672888	0.0132444	0.0514592	0.0576414	0.101845	0.00196637	0.00489752	0.00283514	0.225236	0	0.582729	0.0345326	0.0226934	0.240621
0.091343	1.14392	0.18882	0.0331105	0.0854062	0.00928355	0.0341926	-0.0149266	0.281909	0.156915	0.0627183	0.00437926	0.005378	0.0127573	0.0242781	0.00856547	0.00543885	0.0233532	0.0442197	0.00928274	0.00927945	0.0126134	0.0273081	0.00672888	0.0132447	0.05146	0.0576414	0.101845	0.00196637	0.00489752	0.00277639	0.225236	0	0.583006	0.0350051	0.0227433	0.240453
0.0919382	1.14393	0.188874	0.0338332	0.0867526	0.00923604	0.0339709	-0.0146999	0.280497	0.157718	0.0626543	0.00431864	0.00537793	0.0127572	0.0242766	0.00856517	0.00543848	0.0233524	0.044217	0.00928206	0.00924555	0.0125218	0.027308	0.00672888	0.013245	0.0514607	0.0576413	0.101845	0.00196637	0.00489752	0.00272225	0.225236	0	0.581188	0.0353479	0.0227113	0.240519
0.0917936	1.14395	0.188939	0.034687	0.0883427	0.00917853	0.0336989	-0.0144305	0.27874	0.158673	0.062577	0.00424559	0.00537784	0.0127571	0.0242747	0.00856482	0.00543804	0.0233514	0.0442137	0.00928123	0.00920469	0.0124114	0.027308	0.00672888	0.0132454	0.0514616	0.0576412	0.101844	0.00196637	0.00489752	0.00265702	0.225236	0	0.583923	0.0359527	0.0228566	0.240037
0.0914835	1.14396	0.189007	0.0355824	0.0900168	0.00911883	0.0334165	-0.0141499	0.276914	0.159668	0.0624967	0.00416975	0.00537774	0.012757	0.0242728	0.00856445	0.00543758	0.0233504	0.0442103	0.00928038	0.00916227	0.0122967	0.027308	0.00672888	0.0132457	0.0514625	0.0576412	0.101844	0.00196637	0.00489752	0.00258929	0.225236	0	0.587585	0.0366024	0.023038	0.23943
0.0912241	1.14397	0.189074	0.0364855	0.0917138	0.00905987	0.0331385	-0.01387	0.275121	0.16066	0.0624174	0.00409473	0.00537765	0.0127568	0.0242709	0.00856409	0.00543713	0.0233494	0.044207	0.00927953	0.00912031	0.0121833	0.0273079	0.00672888	0.0132461	0.0514635	0.0576411	0.101844	0.00196637	0.00489752	0.0025223	0.225236	0	0.590797	0.0372108	0.0232015	0.238859
0.0913117	1.14398	0.189135	0.0373461	0.0933431	0.00900572	0.0328852	-0.0136077	0.273499	0.161589	0.0623445	0.00402559	0.00537756	0.0127567	0.0242692	0.00856376	0.00543671	0.0233485	0.0442039	0.00927875	0.00908164	0.0120788	0.0273079	0.00672888	0.0132464	0.0514643	0.0576411	0.101844	0.00196637	0.00489752	0.00246056	0.225236	0	0.591624	0.0376526	0.0232708	0.238557
0.0917227	1.14399	0.189192	0.0381669	0.0949091	0.00895601	0.0326547	-0.013362	0.272032	0.162458	0.0622775	0.00396189	0.00537748	0.0127566	0.0242676	0.00856345	0.00543633	0.0233477	0.044201	0.00927803	0.00904601	0.0119825	0.0273078	0.00672888	0.0132468	0.0514651	0.057641	0.101844	0.00196637	0.00489752	0.00240368	0.225236	0	0.590233	0.0379476	0.0232528	0.238506
0.0920157	1.14401	0.189251	0.039022	0.0965463	0.00890472	0.0324167	-0.0131077	0.270515	0.163357	0.0622083	0.00389617	0.0053774	0.0127565	0.024266	0.00856313	0.00543593	0.0233469	0.0441981	0.00927729	0.00900925	0.0118832	0.0273078	0.00672888	0.0132471	0.0514659	0.0576409	0.101844	0.00196637	0.00489752	0.00234498	0.225236	0	0.5895	0.0382921	0.0232607	0.238364
0.0923624	1.14402	0.189309	0.0398829	0.0982028	0.00885418	0.0321827	-0.0128546	0.269026	0.164252	0.0621401	0.0038313	0.00537732	0.0127563	0.0242643	0.00856281	0.00543554	0.023346	0.0441952	0.00927656	0.00897297	0.0117852	0.0273078	0.00672888	0.0132474	0.0514666	0.0576409	0.101844	0.00196637	0.00489752	0.00228706	0.225236	0	0.588319	0.0386157	0.0232512	0.238262
0.0929119	1.14403	0.189364	0.040724	0.0998324	0.00880632	0.0319625	-0.0126109	0.26763	0.165113	0.0620755	0.00376972	0.00537724	0.0127562	0.0242628	0.00856252	0.00543517	0.0233452	0.0441924	0.00927586	0.00893853	0.0116921	0.0273077	0.00672888	0.0132477	0.0514674	0.0576408	0.101844	0.00196637	0.00489752	0.00223207	0.225236	0	0.585755	0.0388562	0.0231871	0.238315
0.0935455	1.14404	0.189418	0.0415659	0.101472	0.00875951	0.0317477	-0.01237	0.26627	0.165964	0.0620123	0.00370939	0.00537716	0.0127561	0.0242613	0.00856222	0.0054348	0.0233444	0.0441897	0.00927518	0.00890478	0.0116009	0.0273077	0.00672888	0.013248	0.0514681	0.0576408	0.101844	0.00196637	0.00489752	0.00217819	0.225236	0	0.582628	0.0390657	0.0231006	0.238424
0.0938499	1.14405	0.189476	0.0424791	0.103252	0.00870843	0.0315121	-0.0121085	0.264771	0.166887	0.0619433	0.00364366	0.00537708	0.012756	0.0242596	0.00856191	0.0054344	0.0233436	0.0441867	0.00927444	0.00886802	0.0115015	0.0273077	0.00672888	0.0132483	0.0514689	0.0576407	0.101844	0.00196637	0.00489752	0.00211949	0.225236	0	0.581622	0.0394245	0.0230982	0.238261
0.0945273	1.14406	0.18953	0.0433441	0.104952	0.00866211	0.0313003	-0.0118659	0.26343	0.167742	0.0618807	0.00358382	0.00537701	0.0127559	0.0242581	0.00856162	0.00543404	0.0233428	0.0441841	0.00927377	0.00883455	0.0114111	0.0273076	0.00672888	0.0132486	0.0514696	0.0576407	0.101843	0.00196637	0.00489752	0.00206605	0.225236	0	0.57839	0.0396398	0.0230073	0.238358
0.0952177	1.14407	0.189583	0.0442224	0.106685	0.00861587	0.0310891	-0.0116218	0.262094	0.168603	0.0618182	0.00352402	0.00537693	0.0127558	0.0242566	0.00856133	0.00543368	0.023342	0.0441814	0.00927309	0.00880111	0.0113207	0.0273076	0.00672888	0.0132489	0.0514704	0.0576406	0.101843	0.00196637	0.00489752	0.00201266	0.225236	0	0.575186	0.0398631	0.0229173	0.23844
0.095781	1.14408	0.189639	0.0451383	0.108497	0.00856799	0.0308701	-0.0113685	0.260704	0.169496	0.0617535	0.00346212	0.00537685	0.0127557	0.024255	0.00856103	0.00543331	0.0233412	0.0441786	0.00927239	0.00876648	0.0112271	0.0273076	0.00672888	0.0132492	0.0514711	0.0576405	0.101843	0.00196637	0.00489752	0.00195738	0.225236	0	0.572846	0.0401536	0.0228617	0.238402
0.0967246	1.14409	0.189689	0.0460053	0.110227	0.00852466	0.0306736	-0.0111337	0.259464	0.170322	0.0616949	0.00340588	0.00537678	0.0127555	0.0242536	0.00856075	0.00543297	0.0233405	0.0441761	0.00927176	0.00873503	0.0111421	0.0273075	0.00672888	0.0132495	0.0514718	0.0576405	0.101843	0.00196637	0.00489752	0.00190715	0.225236	0	0.568317	0.0402683	0.0227175	0.238624
0.0974278	1.1441	0.189743	0.0468592	0.111894	0.00847812	0.0304607	-0.0108915	0.258118	0.171177	0.061632	0.00334579	0.00537671	0.0127554	0.0242521	0.00856046	0.0054326	0.0233397	0.0441734	0.00927108	0.00870142	0.0110513	0.0273075	0.00672888	0.0132498	0.0514725	0.0576404	0.101843	0.00196637	0.00489752	0.0018535	0.225236	0	0.565267	0.0404498	0.0226309	0.23871
0.0982526	1.14411	0.189795	0.0476351	0.113375	0.00843273	0.0302527	-0.0106616	0.256808	0.17199	0.0615707	0.00328733	0.00537663	0.0127553	0.0242506	0.00856018	0.00543225	0.0233389	0.0441708	0.00927042	0.00866872	0.0109629	0.0273075	0.00672888	0.0132501	0.0514732	0.0576404	0.101843	0.00196637	0.00489752	0.00180129	0.225236	0	0.561613	0.0405822	0.0225195	0.238919
0.0990852	1.14412	0.189847	0.0484194	0.114876	0.00838729	0.0300448	-0.0104304	0.2555	0.172807	0.0615093	0.00322879	0.00537656	0.0127552	0.0242492	0.0085599	0.00543189	0.0233381	0.0441681	0.00926976	0.00863598	0.0108744	0.0273074	0.00672888	0.0132503	0.0514739	0.0576403	0.101843	0.00196637	0.00489752	0.00174901	0.225236	0	0.558017	0.0407128	0.0224098	0.239114
0.100038	1.14413	0.189898	0.0491937	0.116363	0.00834308	0.0298431	-0.0102038	0.254234	0.173607	0.0614496	0.00317174	0.00537649	0.0127551	0.0242477	0.00855962	0.00543155	0.0233374	0.0441656	0.00926912	0.00860407	0.0107882	0.0273074	0.00672888	0.0132506	0.0514746	0.0576403	0.101843	0.00196637	0.00489752	0.00169807	0.225236	0	0.553858	0.0407959	0.0222769	0.239372
0.100852	1.14414	0.189951	0.0500008	0.117916	0.00829717	0.0296335	-0.0099684	0.252916	0.174439	0.0613875	0.00311251	0.00537641	0.012755	0.0242462	0.00855933	0.00543119	0.0233366	0.0441629	0.00926845	0.00857094	0.0106986	0.0273074	0.00672888	0.0132509	0.0514753	0.0576402	0.101843	0.00196637	0.00489752	0.00164518	0.225236	0	0.550577	0.0409374	0.0221787	0.239512
0.101933	1.14415	0.190001	0.050775	0.119412	0.00825401	0.0294374	-0.00974463	0.251689	0.175229	0.0613292	0.00305673	0.00537634	0.0127549	0.0242448	0.00855906	0.00543085	0.0233359	0.0441604	0.00926782	0.00853974	0.0106143	0.0273073	0.00672888	0.0132512	0.051476	0.0576402	0.101843	0.00196637	0.00489752	0.00159536	0.225236	0	0.545963	0.0409735	0.0220262	0.239813
0.102732	1.14416	0.190055	0.0516046	0.121016	0.00820767	0.0292263	-0.00950509	0.250364	0.176075	0.0612665	0.00299688	0.00537627	0.0127548	0.0242433	0.00855877	0.00543049	0.0233351	0.0441577	0.00926715	0.00850627	0.0105238	0.0273073	0.00672888	0.0132515	0.0514767	0.0576401	0.101842	0.00196637	0.00489752	0.00154192	0.225236	0	0.542969	0.0411248	0.0219384	0.239902
0.103532	1.14417	0.190108	0.0524441	0.122644	0.00816124	0.029015	-0.00926396	0.249039	0.176926	0.0612038	0.00293688	0.00537619	0.0127547	0.0242418	0.00855848	0.00543013	0.0233343	0.044155	0.00926647	0.00847271	0.0104331	0.0273073	0.00672888	0.0132518	0.0514775	0.0576401	0.101842	0.00196637	0.00489752	0.00148834	0.225236	0	0.540062	0.0412778	0.0218537	0.239971
0.104909	1.14418	0.190155	0.0532039	0.124127	0.00812059	0.0288316	-0.00904883	0.247898	0.177684	0.0611488	0.00288416	0.00537613	0.0127546	0.0242405	0.00855823	0.00542981	0.0233336	0.0441527	0.00926587	0.00844322	0.0103535	0.0273072	0.00672888	0.013252	0.0514781	0.05764	0.101842	0.00196637	0.00489752	0.00144126	0.225236	0	0.534289	0.0412047	0.0216524	0.240399
0.105975	1.14419	0.190207	0.0540237	0.125727	0.00807652	0.0286321	-0.00881667	0.246652	0.178503	0.0610891	0.00282707	0.00537606	0.0127545	0.0242391	0.00855795	0.00542947	0.0233329	0.0441501	0.00926523	0.00841129	0.0102672	0.0273072	0.00672888	0.0132523	0.0514788	0.05764	0.101842	0.00196637	0.00489752	0.00139028	0.225236	0	0.530259	0.0412584	0.0215209	0.240597
0.107329	1.1442	0.190255	0.0548111	0.127271	0.00803506	0.0284453	-0.00859581	0.245489	0.179282	0.061033	0.00277326	0.00537599	0.0127544	0.0242377	0.00855769	0.00542914	0.0233322	0.0441477	0.00926462	0.00838119	0.0101858	0.0273072	0.00672888	0.0132526	0.0514794	0.0576399	0.101842	0.00196637	0.00489752	0.00134222	0.225236	0	0.524939	0.0412044	0.0213364	0.240953
0.108362	1.14421	0.190307	0.0556583	0.128933	0.00799027	0.0282428	-0.00835816	0.244225	0.18012	0.0609724	0.00271518	0.00537592	0.0127543	0.0242363	0.00855741	0.00542879	0.0233314	0.0441451	0.00926397	0.00834871	0.010098	0.0273071	0.00672888	0.0132529	0.0514801	0.0576399	0.101842	0.00196637	0.00489752	0.00129036	0.225236	0	0.521331	0.0412778	0.0212208	0.241083
0.109294	1.14422	0.19036	0.0565316	0.130649	0.00794437	0.0280354	-0.0081141	0.24293	0.180981	0.0609103	0.00265566	0.00537584	0.0127542	0.0242348	0.00855712	0.00542843	0.0233307	0.0441424	0.0092633	0.00831542	0.0100081	0.0273071	0.00672888	0.0132531	0.0514809	0.0576398	0.101842	0.00196637	0.00489752	0.00123721	0.225236	0	0.518316	0.0413926	0.0211289	0.241128
0.110378	1.14423	0.190412	0.0573935	0.132349	0.00789975	0.0278343	-0.00787503	0.241676	0.181823	0.0608499	0.00259773	0.00537577	0.0127541	0.0242333	0.00855684	0.00542808	0.0233299	0.0441398	0.00926264	0.00828302	0.00992049	0.0273071	0.00672888	0.0132534	0.0514816	0.0576398	0.101842	0.00196637	0.00489752	0.00118548	0.225236	0	0.51468	0.0414526	0.0210111	0.241245
0.111466	1.14424	0.190464	0.0582663	0.134075	0.007855	0.0276328	-0.00763419	0.240421	0.182672	0.0607893	0.00253959	0.00537569	0.0127539	0.0242318	0.00855656	0.00542773	0.0233291	0.0441372	0.00926199	0.0082505	0.0098326	0.027307	0.00672888	0.0132537	0.0514823	0.0576397	0.101842	0.00196637	0.00489752	0.00113356	0.225236	0	0.511141	0.0415145	0.0208967	0.241342
0.112812	1.14425	0.190514	0.0591138	0.135758	0.00781235	0.0274414	-0.00740242	0.239232	0.183488	0.0607315	0.00248408	0.00537563	0.0127538	0.0242304	0.00855629	0.00542739	0.0233284	0.0441347	0.00926136	0.00821946	0.0097487	0.027307	0.00672888	0.013254	0.0514829	0.0576397	0.101842	0.00196637	0.00489752	0.00108399	0.225236	0	0.50655	0.0414847	0.0207387	0.241567
0.113925	1.14426	0.190566	0.0600063	0.137531	0.00776746	0.0272397	-0.0071587	0.237977	0.184347	0.0606707	0.0024257	0.00537555	0.0127537	0.024229	0.00855601	0.00542704	0.0233277	0.0441321	0.0092607	0.0081868	0.00966044	0.027307	0.00672888	0.0132543	0.0514836	0.0576396	0.101842	0.00196637	0.00489752	0.00103185	0.225236	0	0.503132	0.0415446	0.0206281	0.241633
0.115034	1.14427	0.190619	0.0609111	0.139334	0.00772238	0.0270374	-0.00691289	0.236719	0.185212	0.0606096	0.00236702	0.00537548	0.0127536	0.0242275	0.00855572	0.00542668	0.0233269	0.0441295	0.00926004	0.00815398	0.00957175	0.0273069	0.00672888	0.0132546	0.0514844	0.0576396	0.101841	0.00196637	0.00489752	0.000979454	0.225236	0	0.499841	0.0416097	0.0205223	0.241673
0.116157	1.14428	0.190671	0.0618258	0.141161	0.00767726	0.0268352	-0.00666571	0.235462	0.186082	0.0605485	0.00230826	0.0053754	0.0127535	0.024226	0.00855544	0.00542633	0.0233261	0.0441268	0.00925938	0.00812112	0.00948292	0.0273069	0.00672888	0.0132548	0.0514851	0.0576395	0.101841	0.00196637	0.00489752	0.000926979	0.225236	0	0.496596	0.0416733	0.0204178	0.241699
0.117287	1.14429	0.190724	0.0627515	0.143015	0.00763206	0.0266328	-0.00641691	0.234205	0.186958	0.0604872	0.00224935	0.00537533	0.0127534	0.0242245	0.00855515	0.00542597	0.0233254	0.0441242	0.00925871	0.00808816	0.00939387	0.0273069	0.00672888	0.0132551	0.0514858	0.0576395	0.101841	0.00196637	0.00489752	0.000874369	0.225236	0	0.493424	0.041738	0.0203158	0.241708
0.118391	1.1443	0.190777	0.0636925	0.144904	0.00758651	0.0264291	-0.0061652	0.232939	0.187844	0.0604255	0.00218995	0.00537526	0.0127533	0.024223	0.00855487	0.00542561	0.0233246	0.0441215	0.00925804	0.00805494	0.00930409	0.0273068	0.00672888	0.0132554	0.0514865	0.0576394	0.101841	0.00196637	0.00489752	0.000821331	0.225236	0	0.490457	0.0418152	0.0202219	0.24168
0.119121	1.14431	0.190834	0.0646957	0.146918	0.00753793	0.0262115	-0.00589707	0.231586	0.188787	0.0603596	0.00212663	0.00537518	0.0127532	0.0242214	0.00855456	0.00542523	0.0233238	0.0441187	0.00925733	0.00801953	0.00920838	0.0273068	0.00672888	0.0132557	0.0514873	0.0576394	0.101841	0.00196637	0.00489752	0.000764786	0.225236	0	0.489119	0.0420275	0.0201947	0.241429
0.120364	1.14432	0.190886	0.0656419	0.148828	0.00749324	0.0260123	-0.00564715	0.230351	0.189666	0.060299	0.00206826	0.0053751	0.0127531	0.02422	0.00855428	0.00542488	0.023323	0.0441161	0.00925667	0.00798688	0.00912014	0.0273068	0.00672888	0.013256	0.051488	0.0576393	0.101841	0.00196637	0.00489752	0.000712656	0.225236	0	0.485757	0.0420619	0.0200835	0.241436
0.121272	1.14433	0.190942	0.0666449	0.150855	0.00744589	0.025801	-0.0053825	0.229039	0.190596	0.0602348	0.00200641	0.00537503	0.012753	0.0242184	0.00855398	0.0054245	0.0233222	0.0441133	0.00925597	0.00795229	0.00902666	0.0273067	0.00672888	0.0132563	0.0514887	0.0576392	0.101841	0.00196637	0.00489752	0.000657431	0.225236	0	0.483838	0.042217	0.0200316	0.241243
0.122551	1.14434	0.190994	0.0676114	0.152815	0.00740118	0.0256022	-0.00513003	0.227809	0.191484	0.0601741	0.00194794	0.00537495	0.0127529	0.024217	0.00855369	0.00542415	0.0233214	0.0441107	0.00925531	0.00791958	0.00893826	0.0273067	0.00672888	0.0132566	0.0514894	0.0576392	0.101841	0.00196637	0.00489752	0.000605212	0.225236	0	0.48053	0.0422467	0.0199218	0.241225
0.12387	1.14435	0.191047	0.0685856	0.154797	0.00735661	0.0254042	-0.00487698	0.226584	0.192373	0.0601137	0.00188959	0.00537488	0.0127527	0.0242155	0.00855341	0.0054238	0.0233207	0.0441081	0.00925465	0.00788695	0.00885006	0.0273067	0.00672888	0.0132569	0.0514901	0.0576391	0.101841	0.00196637	0.00489752	0.000553103	0.225236	0	0.477174	0.042267	0.0198096	0.241205
0.125027	1.14436	0.191101	0.0695936	0.15685	0.00731072	0.0252004	-0.00461595	0.225322	0.19329	0.0600514	0.00182951	0.0053748	0.0127526	0.024214	0.00855312	0.00542343	0.0233199	0.0441054	0.00925398	0.00785334	0.00875924	0.0273066	0.00672888	0.0132572	0.0514909	0.0576391	0.101841	0.00196637	0.00489752	0.000499452	0.225236	0	0.474545	0.042347	0.019727	0.241079
0.126126	1.14437	0.191155	0.0706216	0.158948	0.00726432	0.0249946	-0.00435098	0.224048	0.194221	0.0599884	0.00176873	0.00537473	0.0127525	0.0242124	0.00855283	0.00542307	0.0233191	0.0441026	0.00925329	0.00781935	0.00866737	0.0273066	0.00672888	0.0132575	0.0514916	0.057639	0.101841	0.00196637	0.00489752	0.000445176	0.225236	0	0.472216	0.0424498	0.0196566	0.240903
0.127256	1.14438	0.19121	0.071645	0.161017	0.0072182	0.0247929	-0.00408427	0.222821	0.195158	0.0599257	0.00170804	0.00537465	0.0127524	0.0242109	0.00855253	0.0054227	0.0233183	0.0440999	0.00925261	0.00778541	0.00857564	0.0273066	0.00672888	0.0132578	0.0514923	0.057639	0.10184	0.00196637	0.00489752	0.000390985	0.225236	0	0.469813	0.0425424	0.0195827	0.240717
0.128455	1.14439	0.191264	0.0726615	0.163055	0.00717262	0.0245967	-0.00381695	0.221648	0.196097	0.0598636	0.00164778	0.00537458	0.0127523	0.0242094	0.00855224	0.00542233	0.0233175	0.0440972	0.00925193	0.0077517	0.00848454	0.0273065	0.00672888	0.0132581	0.0514931	0.0576389	0.10184	0.00196637	0.00489752	0.000337167	0.225236	0	0.467077	0.0426021	0.0194947	0.240553
0.129556	1.1444	0.191319	0.0737066	0.165157	0.00712629	0.0243974	-0.00354401	0.220458	0.197055	0.0598005	0.0015865	0.0053745	0.0127522	0.0242079	0.00855194	0.00542196	0.0233167	0.0440945	0.00925123	0.00771742	0.00839191	0.0273065	0.00672888	0.0132584	0.0514938	0.0576389	0.10184	0.00196637	0.00489752	0.000282442	0.225236	0	0.464603	0.042683	0.0194174	0.240337
0.130623	1.14441	0.191375	0.0747724	0.16731	0.00707967	0.0241972	-0.00326773	0.219262	0.198025	0.059737	0.00152477	0.00537442	0.0127521	0.0242063	0.00855164	0.00542159	0.0233159	0.0440917	0.00925054	0.0076829	0.0082986	0.0273065	0.00672888	0.0132587	0.0514945	0.0576388	0.10184	0.00196637	0.00489752	0.000227322	0.225236	0	0.462162	0.0427688	0.0193413	0.240102
0.131866	1.14442	0.191429	0.0758334	0.169462	0.00703409	0.024002	-0.00299522	0.2181	0.198982	0.0596749	0.00146434	0.00537435	0.012752	0.0242048	0.00855135	0.00542123	0.0233151	0.044089	0.00924986	0.0076491	0.00820726	0.0273064	0.00672888	0.013259	0.0514953	0.0576388	0.10184	0.00196637	0.00489752	0.000173358	0.225236	0	0.459062	0.0428331	0.0192386	0.239942
0.133083	1.14443	0.191484	0.0769149	0.171665	0.00698823	0.023806	-0.00271949	0.216934	0.199949	0.0596124	0.0014035	0.00537427	0.0127518	0.0242033	0.00855106	0.00542086	0.0233143	0.0440863	0.00924917	0.00761507	0.0081153	0.0273064	0.00672888	0.0132593	0.051496	0.0576387	0.10184	0.00196637	0.00489752	0.000119029	0.225236	0	0.455984	0.0428999	0.0191366	0.239764
0.13433	1.14444	0.191539	0.0780103	0.173905	0.00694247	0.0236107	-0.00244246	0.215773	0.20092	0.05955	0.00134273	0.00537419	0.0127517	0.0242017	0.00855076	0.00542049	0.0233135	0.0440835	0.00924848	0.00758108	0.00802343	0.0273064	0.00672888	0.0132596	0.0514967	0.0576387	0.10184	0.00196637	0.00489752	6.47585e-05	0.225236	0	0.452711	0.0429354	0.0190258	0.239596
0.135232	1.14446	0.191596	0.0791645	0.176272	0.00689458	0.0234062	-0.00215198	0.214555	0.201939	0.0594847	0.00127912	0.00537411	0.0127516	0.0242001	0.00855045	0.00542011	0.0233127	0.0440807	0.00924777	0.0075455	0.00792728	0.0273063	0.00672888	0.0132599	0.0514975	0.0576386	0.10184	0.00196637	0.00489752	7.95518e-06	0.225236	0	0.450495	0.0430584	0.0189589	0.239266
0.136145	1.14447	0.191653	0.0803353	0.178682	0.00684671	0.0232022	-0.00185969	0.213342	0.202963	0.0594194	0.00121549	0.00537403	0.0127515	0.0241985	0.00855015	0.00541972	0.0233119	0.0440778	0.00924705	0.00750992	0.0078311	0.0273063	0.00672888	0.0132602	0.0514983	0.0576385	0.10184	0.00196637	0.00489752	-4.88658e-05	0.225236	0	0.448129	0.043154	0.0188851	0.238932
0.136973	1.14448	0.191711	0.0815341	0.18116	0.00679834	0.0229963	-0.00156258	0.212119	0.204005	0.0593534	0.00115114	0.00537395	0.0127514	0.0241969	0.00854983	0.00541933	0.023311	0.0440749	0.00924632	0.00747392	0.00773382	0.0273062	0.00672888	0.0132605	0.0514991	0.0576385	0.10184	0.00196637	0.00489752	-0.000106334	0.225236	0	0.445934	0.0432526	0.0188179	0.238556
0.138015	1.14449	0.191768	0.0827259	0.183634	0.00675118	0.0227961	-0.00127013	0.210932	0.205029	0.059289	0.0010883	0.00537387	0.0127513	0.0241953	0.00854953	0.00541895	0.0233102	0.0440721	0.00924561	0.00743877	0.00763883	0.0273062	0.00672888	0.0132608	0.0514998	0.0576384	0.101839	0.00196637	0.00489752	-0.000162451	0.225236	0	0.44312	0.0432749	0.0187238	0.238251
0.139025	1.1445	0.191825	0.0839404	0.186165	0.00670379	0.0225954	-0.000974424	0.209742	0.206064	0.0592243	0.0010251	0.00537379	0.0127511	0.0241937	0.00854922	0.00541857	0.0233094	0.0440693	0.0092449	0.00740343	0.00754331	0.0273062	0.00672888	0.0132611	0.0515006	0.0576384	0.101839	0.00196637	0.00489752	-0.000218883	0.225236	0	0.440552	0.0433074	0.0186394	0.237898
0.14024	1.14451	0.191881	0.0851499	0.188697	0.00665749	0.0223997	-0.000682823	0.208585	0.207085	0.0591611	0.000963275	0.00537372	0.012751	0.0241922	0.00854892	0.0054182	0.0233086	0.0440665	0.0092442	0.00736885	0.00744985	0.0273061	0.00672888	0.0132614	0.0515013	0.0576383	0.101839	0.00196637	0.00489752	-0.000274095	0.225236	0	0.43751	0.0432986	0.0185349	0.237598
0.141177	1.14452	0.191938	0.0864114	0.191346	0.00660962	0.0221975	-0.00038034	0.207388	0.208143	0.0590957	0.000899337	0.00537364	0.0127509	0.0241906	0.00854861	0.00541781	0.0233077	0.0440636	0.00924348	0.00733309	0.0073532	0.0273061	0.00672888	0.0132617	0.0515021	0.0576383	0.101839	0.00196637	0.00489752	-0.000331192	0.225236	0	0.435506	0.0434035	0.0184743	0.237138
0.142192	1.14453	0.191996	0.0876837	0.194028	0.00656214	0.0219973	-7.79653e-05	0.206204	0.2092	0.0590308	0.000835848	0.00537356	0.0127508	0.024189	0.00854831	0.00541742	0.0233069	0.0440608	0.00924277	0.00729758	0.00725723	0.0273061	0.00672888	0.013262	0.0515029	0.0576382	0.101839	0.00196637	0.00489752	-0.000387887	0.225236	0	0.433426	0.0435131	0.0184105	0.236675
0.143198	1.14454	0.192053	0.0889771	0.196766	0.00651459	0.0217971	0.000226977	0.205021	0.210267	0.0589658	0.000772197	0.00537348	0.0127507	0.0241874	0.008548	0.00541704	0.0233061	0.0440579	0.00924205	0.00726198	0.00716101	0.027306	0.00672888	0.0132624	0.0515036	0.0576381	0.101839	0.00196637	0.00489752	-0.000444728	0.225236	0	0.431537	0.0436553	0.018355	0.236151
0.144162	1.14455	0.192111	0.0902959	0.199567	0.00646679	0.0215962	0.000535475	0.203834	0.211345	0.0589005	0.000708165	0.0053734	0.0127506	0.0241858	0.00854769	0.00541665	0.0233052	0.0440551	0.00924133	0.00722616	0.00706422	0.027306	0.00672888	0.0132627	0.0515044	0.0576381	0.101839	0.00196637	0.00489752	-0.000501909	0.225236	0	0.429936	0.0438409	0.0183118	0.235564
0.145102	1.14456	0.192169	0.0916382	0.202429	0.00641885	0.021395	0.000846971	0.202646	0.212433	0.0588349	0.00064389	0.00537332	0.0127504	0.0241842	0.00854738	0.00541626	0.0233044	0.0440522	0.0092406	0.00719021	0.00696707	0.027306	0.00672888	0.013263	0.0515052	0.057638	0.101839	0.00196637	0.00489752	-0.000559307	0.225236	0	0.428508	0.0440406	0.0182757	0.234936
0.14605	1.14458	0.192227	0.0930008	0.205345	0.00637093	0.0211942	0.00116058	0.201461	0.213528	0.0587694	0.000579579	0.00537323	0.0127503	0.0241825	0.00854707	0.00541588	0.0233036	0.0440493	0.00923987	0.00715424	0.00686985	0.0273059	0.00672888	0.0132633	0.051506	0.057638	0.101839	0.00196637	0.00489752	-0.000616737	0.225236	0	0.427021	0.0441871	0.0182356	0.234298
0.147267	1.14459	0.192284	0.0943536	0.208253	0.00632433	0.0209994	0.00146865	0.200313	0.214603	0.0587056	0.00051694	0.00537316	0.0127502	0.024181	0.00854676	0.0054155	0.0233027	0.0440465	0.00923917	0.00711921	0.00677517	0.0273059	0.00672888	0.0132636	0.0515067	0.0576379	0.101839	0.00196637	0.00489752	-0.000672673	0.225236	0	0.424765	0.044248	0.0181624	0.233754
0.148302	1.1446	0.192341	0.0957326	0.211216	0.00627677	0.0208007	0.00178305	0.199142	0.215701	0.0586405	0.000453011	0.00537308	0.0127501	0.0241794	0.00854645	0.00541511	0.0233019	0.0440436	0.00923845	0.00708345	0.00667853	0.0273059	0.00672888	0.0132639	0.0515075	0.0576379	0.101838	0.00196637	0.00489752	-0.000729762	0.225236	0	0.423048	0.044362	0.0181119	0.233126
0.149097	1.14461	0.192401	0.0970606	0.214009	0.0062279	0.0205963	0.0020983	0.197943	0.216803	0.0585737	0.000387462	0.00537299	0.01275	0.0241777	0.00854614	0.00541471	0.0233011	0.0440407	0.00923771	0.00704679	0.00657945	0.0273058	0.00672888	0.0132642	0.0515083	0.0576378	0.101838	0.00196637	0.00489752	-0.000788297	0.225236	0	0.422023	0.0445465	0.0180908	0.232457
0.150132	1.14462	0.192459	0.0983578	0.216732	0.00618014	0.0203971	0.00240689	0.196778	0.217882	0.0585084	0.000323361	0.00537291	0.0127499	0.0241761	0.00854583	0.00541433	0.0233002	0.0440378	0.00923698	0.00701094	0.00648256	0.0273058	0.00672888	0.0132645	0.0515091	0.0576377	0.101838	0.00196637	0.00489752	-0.00084554	0.225236	0	0.420329	0.044658	0.0180409	0.231887
0.150917	1.14463	0.192518	0.099696	0.219546	0.00613119	0.0201931	0.00272414	0.195585	0.218991	0.0584414	0.000257629	0.00537283	0.0127497	0.0241744	0.00854551	0.00541393	0.0232994	0.0440349	0.00923624	0.00697417	0.00638319	0.0273057	0.00672888	0.0132649	0.0515099	0.0576377	0.101838	0.00196637	0.00489752	-0.000904239	0.225236	0	0.419337	0.044842	0.0180209	0.231201
0.151896	1.14464	0.192576	0.101025	0.222347	0.00608314	0.0199933	0.00303745	0.19442	0.220086	0.0583756	0.000193031	0.00537275	0.0127496	0.0241728	0.00854519	0.00541354	0.0232985	0.044032	0.00923551	0.00693804	0.00628555	0.0273057	0.00672888	0.0132652	0.0515106	0.0576376	0.101838	0.00196637	0.00489752	-0.000961925	0.225236	0	0.417813	0.0449671	0.0179778	0.230582
0.152705	1.14465	0.192636	0.102385	0.225221	0.00603429	0.0197905	0.00335708	0.193237	0.221203	0.0583087	0.00012733	0.00537267	0.0127495	0.0241712	0.00854488	0.00541314	0.0232977	0.044029	0.00923477	0.00690129	0.00618624	0.0273057	0.00672888	0.0132655	0.0515114	0.0576376	0.101838	0.00196637	0.00489752	-0.0010206	0.225236	0	0.416758	0.0451407	0.0179547	0.229881
0.153911	1.14466	0.192693	0.103714	0.228036	0.00598723	0.0195956	0.00366724	0.192104	0.222286	0.0582443	6.39546e-05	0.00537259	0.0127494	0.0241696	0.00854457	0.00541276	0.0232968	0.0440262	0.00923406	0.00686585	0.00609044	0.0273056	0.00672888	0.0132658	0.0515122	0.0576375	0.101838	0.00196637	0.00489752	-0.00107719	0.225236	0	0.41463	0.0451955	0.0178851	0.229326
0.154874	1.14468	0.192752	0.105084	0.230942	0.00593904	0.0193963	0.0039858	0.190946	0.223399	0.0581783	-9.67647e-07	0.00537251	0.0127493	0.0241679	0.00854425	0.00541236	0.023296	0.0440233	0.00923333	0.00682954	0.0059923	0.0273056	0.00672888	0.0132661	0.051513	0.0576375	0.101838	0.00196637	0.00489752	-0.00113517	0.225236	0	0.413173	0.0453207	0.0178443	0.228661
0.15593	1.14469	0.19281	0.106457	0.233863	0.00589125	0.019199	0.00430346	0.189801	0.224508	0.0581128	-6.5423e-05	0.00537243	0.0127491	0.0241663	0.00854394	0.00541198	0.0232951	0.0440204	0.0092326	0.00679349	0.00589487	0.0273056	0.00672888	0.0132665	0.0515138	0.0576374	0.101838	0.00196637	0.00489752	-0.00119272	0.225236	0	0.411481	0.0454177	0.017793	0.228012
0.156991	1.1447	0.192868	0.107843	0.236817	0.00584345	0.019002	0.00462262	0.188659	0.225622	0.0580473	-0.000129925	0.00537234	0.012749	0.0241647	0.00854363	0.00541158	0.0232943	0.0440175	0.00923187	0.00675741	0.00579737	0.0273055	0.00672888	0.0132668	0.0515146	0.0576373	0.101838	0.00196637	0.00489752	-0.00125033	0.225236	0	0.409781	0.0455114	0.0177412	0.227352
0.157937	1.14471	0.192927	0.109256	0.239836	0.00579514	0.0188031	0.00494654	0.187508	0.226753	0.0579811	-0.000195165	0.00537226	0.0127489	0.0241631	0.00854331	0.00541119	0.0232935	0.0440145	0.00923113	0.00672092	0.00569875	0.0273055	0.00672888	0.0132671	0.0515153	0.0576373	0.101837	0.00196637	0.00489752	-0.00130858	0.225236	0	0.408395	0.0456374	0.0177028	0.226633
0.15892	1.14472	0.192986	0.110679	0.242883	0.00574697	0.0186052	0.0052711	0.186363	0.227886	0.057915	-0.000260262	0.00537218	0.0127488	0.0241614	0.008543	0.0054108	0.0232926	0.0440116	0.0092304	0.00668451	0.00560035	0.0273054	0.00672888	0.0132674	0.0515161	0.0576372	0.101837	0.00196637	0.00489752	-0.00136672	0.225236	0	0.406918	0.0457511	0.0176602	0.225914
0.159753	1.14473	0.193046	0.112132	0.246002	0.00569817	0.0184049	0.00560123	0.185206	0.229037	0.0578481	-0.000326252	0.0053721	0.0127487	0.0241598	0.00854268	0.0054104	0.0232917	0.0440087	0.00922966	0.0066476	0.0055006	0.0273054	0.00672888	0.0132677	0.0515169	0.0576372	0.101837	0.00196637	0.00489752	-0.00142565	0.225236	0	0.405828	0.0459063	0.0176342	0.225124
0.160863	1.14474	0.193104	0.11357	0.249096	0.0056505	0.0182098	0.00592576	0.184081	0.230169	0.0577827	-0.000390778	0.00537202	0.0127485	0.0241581	0.00854237	0.00541001	0.0232909	0.0440058	0.00922893	0.00661151	0.00540306	0.0273054	0.00672888	0.013268	0.0515177	0.0576371	0.101837	0.00196637	0.00489752	-0.00148327	0.225236	0	0.404041	0.0459805	0.0175777	0.224426
0.161944	1.14475	0.193163	0.115026	0.252236	0.00560269	0.0180143	0.0062528	0.182955	0.23131	0.0577171	-0.00045555	0.00537194	0.0127484	0.0241565	0.00854205	0.00540962	0.0232901	0.0440029	0.0092282	0.00657528	0.00530516	0.0273053	0.00672888	0.0132684	0.0515185	0.0576371	0.101837	0.00196637	0.00489752	-0.00154111	0.225236	0	0.402343	0.0460621	0.0175248	0.223701
0.163271	1.14476	0.193221	0.116471	0.25536	0.00555583	0.0178232	0.00657525	0.181856	0.232434	0.0576528	-0.000519087	0.00537186	0.0127483	0.0241549	0.00854175	0.00540923	0.0232892	0.044	0.00922748	0.00653975	0.00520911	0.0273053	0.00672888	0.0132687	0.0515193	0.057637	0.101837	0.00196637	0.00489752	-0.00159785	0.225236	0	0.400051	0.0460727	0.0174458	0.223053
0.164552	1.14478	0.193279	0.117936	0.258536	0.00550875	0.0176313	0.00690072	0.180754	0.233568	0.0575882	-0.000582978	0.00537178	0.0127482	0.0241533	0.00854144	0.00540885	0.0232884	0.0439971	0.00922676	0.00650401	0.00511254	0.0273053	0.00672888	0.013269	0.05152	0.0576369	0.101837	0.00196637	0.00489752	-0.0016549	0.225236	0	0.397894	0.0460958	0.0173724	0.222371
0.165639	1.14479	0.193337	0.119437	0.261797	0.00546087	0.0174365	0.00723287	0.179635	0.234725	0.0575225	-0.000647972	0.00537169	0.0127481	0.0241517	0.00854112	0.00540845	0.0232875	0.0439942	0.00922603	0.00646766	0.00501429	0.0273052	0.00672888	0.0132693	0.0515208	0.0576369	0.101837	0.00196637	0.00489752	-0.00171294	0.225236	0	0.396224	0.0461724	0.01732	0.221602
0.166932	1.1448	0.193395	0.120932	0.265053	0.00541376	0.0172452	0.00756168	0.178538	0.235871	0.0574578	-0.000711994	0.00537161	0.0127479	0.0241501	0.00854081	0.00540807	0.0232867	0.0439914	0.0092253	0.00643185	0.00491752	0.0273052	0.00672888	0.0132696	0.0515216	0.0576368	0.101837	0.00196637	0.00489752	-0.00177011	0.225236	0	0.394077	0.0461906	0.0172466	0.220892
0.167619	1.14481	0.193456	0.122507	0.268489	0.00536435	0.0170446	0.00790718	0.177387	0.237074	0.0573899	-0.000779157	0.00537153	0.0127478	0.0241484	0.00854049	0.00540766	0.0232858	0.0439883	0.00922455	0.00639429	0.00481599	0.0273052	0.00672888	0.0132699	0.0515224	0.0576368	0.101837	0.00196637	0.00489752	-0.00183009	0.225236	0	0.393373	0.0463758	0.017236	0.219949
0.168698	1.14482	0.193515	0.124057	0.27188	0.0053164	0.0168503	0.00824473	0.176275	0.238249	0.057324	-0.000844392	0.00537145	0.0127477	0.0241467	0.00854017	0.00540726	0.023285	0.0439854	0.00922381	0.0063578	0.00471738	0.0273051	0.00672888	0.0132703	0.0515232	0.0576367	0.101836	0.00196637	0.00489752	-0.00188835	0.225236	0	0.391746	0.0464504	0.0171849	0.219132
0.169792	1.14483	0.193575	0.125621	0.275312	0.0052685	0.0166566	0.0085837	0.175167	0.23943	0.0572582	-0.000909626	0.00537137	0.0127476	0.0241451	0.00853985	0.00540687	0.0232841	0.0439825	0.00922307	0.00632131	0.00461878	0.0273051	0.00672888	0.0132706	0.051524	0.0576366	0.101836	0.00196637	0.00489752	-0.0019466	0.225236	0	0.390098	0.0465201	0.0171326	0.218304
0.170567	1.14484	0.193635	0.127236	0.27886	0.00521943	0.0164583	0.00893211	0.174033	0.240642	0.0571908	-0.000976475	0.00537128	0.0127474	0.0241434	0.00853953	0.00540647	0.0232833	0.0439795	0.00922232	0.00628392	0.00451773	0.027305	0.00672888	0.0132709	0.0515248	0.0576366	0.101836	0.00196637	0.00489752	-0.0020063	0.225236	0	0.389186	0.0466756	0.0171124	0.21735
0.1718	1.14485	0.193694	0.128819	0.28235	0.005172	0.0162671	0.00927127	0.172941	0.241822	0.0571256	-0.00104116	0.0053712	0.0127473	0.0241418	0.00853922	0.00540607	0.0232824	0.0439766	0.00922159	0.00624775	0.00441995	0.027305	0.00672888	0.0132712	0.0515256	0.0576365	0.101836	0.00196637	0.00489752	-0.00206406	0.225236	0	0.387235	0.0467043	0.0170464	0.21654
0.173185	1.14487	0.193752	0.130404	0.285853	0.00512508	0.0160782	0.00960873	0.171864	0.242996	0.057061	-0.00110521	0.00537112	0.0127472	0.0241402	0.00853891	0.00540569	0.0232816	0.0439737	0.00922087	0.00621192	0.00432313	0.027305	0.00672888	0.0132715	0.0515263	0.0576365	0.101836	0.00196637	0.00489752	-0.00212126	0.225236	0	0.384964	0.0466914	0.016966	0.215764
0.174724	1.14488	0.19381	0.13199	0.289368	0.00507864	0.0158916	0.00994457	0.170801	0.244164	0.0569971	-0.00116866	0.00537104	0.0127471	0.0241386	0.0085386	0.0054053	0.0232807	0.0439709	0.00922015	0.00617643	0.00422722	0.0273049	0.00672888	0.0132718	0.0515271	0.0576364	0.101836	0.00196637	0.00489752	-0.00217792	0.225236	0	0.38238	0.0466373	0.0168715	0.215023
0.175742	1.14489	0.193869	0.133647	0.293047	0.00503039	0.0156977	0.0102944	0.169697	0.24538	0.0569308	-0.0012346	0.00537096	0.012747	0.0241369	0.00853828	0.00540491	0.0232799	0.0439679	0.00921941	0.00613955	0.00412755	0.0273049	0.00672888	0.0132722	0.0515279	0.0576364	0.101836	0.00196637	0.00489752	-0.0022368	0.225236	0	0.380956	0.0467215	0.0168279	0.214088
0.17745	1.1449	0.193927	0.135252	0.296621	0.00498442	0.0155136	0.0106303	0.168649	0.246548	0.0568675	-0.00129749	0.00537088	0.0127469	0.0241353	0.00853798	0.00540452	0.0232791	0.0439651	0.0092187	0.00610437	0.00403248	0.0273049	0.00672888	0.0132725	0.0515287	0.0576363	0.101836	0.00196637	0.00489752	-0.00229297	0.225236	0	0.378063	0.0466226	0.0167192	0.213366
0.178531	1.14491	0.193986	0.136961	0.300429	0.00493653	0.015324	0.0109864	0.167584	0.247785	0.0568015	-0.0013633	0.0053708	0.0127467	0.0241337	0.00853766	0.00540413	0.0232782	0.0439621	0.00921796	0.00606757	0.003933	0.0273048	0.00672888	0.0132728	0.0515295	0.0576362	0.101836	0.00196637	0.00489752	-0.00235173	0.225236	0	0.376534	0.0466887	0.0166706	0.212384
0.179346	1.14492	0.194047	0.138736	0.304385	0.00488796	0.0151341	0.0113543	0.166531	0.249062	0.0567345	-0.00143034	0.00537071	0.0127466	0.024132	0.00853733	0.00540372	0.0232773	0.0439591	0.0092172	0.00603007	0.00383167	0.0273048	0.00672888	0.0132731	0.0515303	0.0576362	0.101836	0.00196637	0.00489752	-0.00241159	0.225236	0	0.375596	0.046826	0.0166479	0.211264
0.180621	1.14493	0.194107	0.14048	0.308282	0.00484088	0.0149507	0.0117136	0.165518	0.250309	0.0566695	-0.0014954	0.00537063	0.0127465	0.0241304	0.00853702	0.00540333	0.0232765	0.0439562	0.00921647	0.00599368	0.00373332	0.0273047	0.00672888	0.0132734	0.0515311	0.0576361	0.101835	0.00196637	0.00489752	-0.0024697	0.225236	0	0.373735	0.046858	0.0165844	0.210274
0.18152	1.14494	0.194167	0.14228	0.312306	0.0047926	0.0147628	0.0120832	0.16448	0.251592	0.0566028	-0.00156216	0.00537055	0.0127464	0.0241287	0.00853669	0.00540292	0.0232756	0.0439532	0.00921571	0.00595634	0.00363241	0.0273047	0.00672888	0.0132738	0.0515319	0.0576361	0.101835	0.00196637	0.00489752	-0.00252931	0.225236	0	0.372728	0.0470289	0.0165594	0.209137
0.182781	1.14496	0.194227	0.144058	0.316292	0.00474546	0.0145798	0.0124465	0.163472	0.252852	0.0565377	-0.00162741	0.00537046	0.0127462	0.024127	0.00853638	0.00540253	0.0232748	0.0439503	0.00921498	0.00591984	0.00353377	0.0273047	0.00672888	0.0132741	0.0515327	0.057636	0.101835	0.00196637	0.00489752	-0.00258759	0.225236	0	0.371	0.0471016	0.0165021	0.2081
0.184158	1.14497	0.194286	0.14584	0.320295	0.00469866	0.0143986	0.012809	0.162474	0.25411	0.056473	-0.00169226	0.00537038	0.0127461	0.0241254	0.00853606	0.00540214	0.0232739	0.0439474	0.00921424	0.00588357	0.00343574	0.0273046	0.00672888	0.0132744	0.0515334	0.0576359	0.101835	0.00196637	0.00489752	-0.0026455	0.225236	0	0.369068	0.0471367	0.0164352	0.207081
0.185407	1.14498	0.194346	0.147652	0.32437	0.00465144	0.0142159	0.0131761	0.16147	0.255383	0.0564077	-0.00175772	0.0053703	0.012746	0.0241238	0.00853575	0.00540174	0.0232731	0.0439445	0.00921351	0.00584696	0.00333679	0.0273046	0.00672888	0.0132747	0.0515342	0.0576359	0.101835	0.00196637	0.00489752	-0.00270395	0.225236	0	0.367419	0.0471956	0.0163804	0.206005
0.186885	1.14499	0.194404	0.149457	0.328437	0.00460489	0.0140362	0.0135401	0.160484	0.256645	0.0563434	-0.00182233	0.00537022	0.0127459	0.0241221	0.00853543	0.00540135	0.0232722	0.0439416	0.00921278	0.00581083	0.00323914	0.0273046	0.00672888	0.013275	0.051535	0.0576358	0.101835	0.00196637	0.00489752	-0.00276164	0.225236	0	0.365344	0.0471871	0.0163062	0.204982
0.187997	1.145	0.194465	0.151314	0.332628	0.00455723	0.0138524	0.0139136	0.159476	0.25794	0.0562775	-0.00188849	0.00537014	0.0127458	0.0241205	0.00853511	0.00540095	0.0232714	0.0439386	0.00921203	0.00577382	0.00313913	0.0273045	0.00672888	0.0132754	0.0515358	0.0576358	0.101835	0.00196637	0.00489752	-0.00282072	0.225236	0	0.364009	0.0472608	0.0162645	0.203829
0.188911	1.14501	0.194526	0.153206	0.336905	0.004509	0.0136665	0.014293	0.158456	0.259255	0.0562108	-0.00195548	0.00537005	0.0127456	0.0241188	0.00853479	0.00540055	0.0232705	0.0439356	0.00921128	0.00573635	0.00303787	0.0273045	0.00672888	0.0132757	0.0515366	0.0576357	0.101835	0.00196637	0.00489752	-0.00288055	0.225236	0	0.363072	0.0473753	0.0162402	0.202599
0.189867	1.14502	0.194587	0.15511	0.341215	0.0044609	0.0134814	0.014673	0.157442	0.260573	0.0561442	-0.00202234	0.00536997	0.0127455	0.0241171	0.00853446	0.00540014	0.0232696	0.0439326	0.00921052	0.00569896	0.0029368	0.0273045	0.00672888	0.013276	0.0515374	0.0576357	0.101835	0.00196637	0.00489752	-0.00294026	0.225236	0	0.362099	0.0475025	0.0162146	0.201362
0.190927	1.14503	0.194647	0.157019	0.345544	0.00441309	0.0132978	0.0150524	0.156437	0.261887	0.0560781	-0.00208884	0.00536989	0.0127454	0.0241154	0.00853414	0.00539974	0.0232687	0.0439296	0.00920977	0.00566176	0.00283628	0.0273044	0.00672888	0.0132763	0.0515382	0.0576356	0.101834	0.00196637	0.00489752	-0.00299964	0.225236	0	0.360962	0.0476145	0.0161817	0.20014
0.191726	1.14505	0.194709	0.15897	0.349974	0.00436455	0.0131114	0.0154388	0.155418	0.263226	0.0560109	-0.00215639	0.0053698	0.0127453	0.0241137	0.00853382	0.00539933	0.0232679	0.0439266	0.00920901	0.00562398	0.00273418	0.0273044	0.00672888	0.0132767	0.0515391	0.0576355	0.101834	0.00196637	0.00489752	-0.00305996	0.225236	0	0.360342	0.0477942	0.0161718	0.198821
0.192813	1.14506	0.19477	0.160906	0.354381	0.00431682	0.0129285	0.0158207	0.154418	0.264549	0.0559449	-0.00222286	0.00536972	0.0127451	0.0241121	0.00853349	0.00539893	0.023267	0.0439236	0.00920826	0.0055868	0.0026337	0.0273043	0.00672888	0.013277	0.0515399	0.0576355	0.101834	0.00196637	0.00489752	-0.00311932	0.225236	0	0.359195	0.0478979	0.0161381	0.197575
0.194153	1.14507	0.194829	0.162833	0.358773	0.00426977	0.0127484	0.0161989	0.153435	0.265858	0.0558797	-0.00228843	0.00536963	0.012745	0.0241104	0.00853318	0.00539853	0.0232661	0.0439206	0.00920752	0.00555013	0.00253458	0.0273043	0.00672888	0.0132773	0.0515407	0.0576354	0.101834	0.00196637	0.00489752	-0.00317788	0.225236	0	0.3576	0.0479318	0.0160838	0.19639
0.195345	1.14508	0.19489	0.164789	0.363241	0.0042223	0.0125668	0.0165816	0.152443	0.267183	0.055814	-0.00235462	0.00536955	0.0127449	0.0241088	0.00853286	0.00539813	0.0232653	0.0439177	0.00920677	0.00551311	0.00243453	0.0273043	0.00672888	0.0132776	0.0515415	0.0576354	0.101834	0.00196637	0.00489752	-0.00323698	0.225236	0	0.356311	0.0480057	0.0160431	0.195143
0.196633	1.14509	0.19495	0.166751	0.367728	0.00417507	0.0123863	0.0169639	0.151458	0.268506	0.0557486	-0.00242051	0.00536947	0.0127448	0.0241071	0.00853254	0.00539773	0.0232644	0.0439147	0.00920603	0.00547626	0.00233493	0.0273042	0.00672888	0.013278	0.0515423	0.0576353	0.101834	0.00196637	0.00489752	-0.00329582	0.225236	0	0.354878	0.0480594	0.0159958	0.193908
0.197403	1.1451	0.195012	0.168778	0.372372	0.00412646	0.0122006	0.017358	0.150443	0.269871	0.0556813	-0.00248834	0.00536938	0.0127447	0.0241054	0.00853221	0.00539732	0.0232635	0.0439117	0.00920526	0.00543832	0.0022324	0.0273042	0.00672888	0.0132783	0.0515431	0.0576352	0.101834	0.00196637	0.00489752	-0.00335639	0.225236	0	0.354405	0.0482432	0.0159916	0.192506
0.19777	1.14512	0.195075	0.170861	0.377148	0.0040768	0.0120109	0.0177616	0.149407	0.271267	0.0556125	-0.00255764	0.0053693	0.0127445	0.0241036	0.00853187	0.00539691	0.0232626	0.0439086	0.00920448	0.00539956	0.00212765	0.0273041	0.00672888	0.0132786	0.0515439	0.0576352	0.101834	0.00196637	0.00489752	-0.00341828	0.225236	0	0.354674	0.048529	0.0160209	0.190971
0.198483	1.29001	0.36655	0.128435	0.736596	0.0261306	-0.0322927	0.0546071	0.18354	-0.877182	0.0412187	-0.0026257	0.00536921	0.0127444	0.0241019	0.00853154	0.00539649	0.0232617	0.0439055	0.00920371	0.00536149	0.00202476	0.0273041	0.00672888	0.013279	0.0515447	0.0576351	0.101834	0.00196637	0.00489752	-0.00347906	0.225236	0	0.354336	0.0487335	0.0160228	0.400307
0.199064	1.18122	0.213593	-0.0841537	0.451702	0.00980925	0.00880165	0.0188895	0.175801	0.11884	0.0548272	-0.00269425	0.00536913	0.0127443	0.0241002	0.00853121	0.00539608	0.0232608	0.0439024	0.00920294	0.00532315	0.00192114	0.0273041	0.00672888	0.0132793	0.0515456	0.0576351	0.101834	0.00196637	0.00489752	-0.00354027	0.225236	0	-4.20253	-0.54277	-0.187533	0.841862
0.199387	1.18622	0.21292	-0.099233	0.46112	0.010289	0.00864989	0.0186873	0.179509	0.117693	0.0549265	-0.00276373	0.00536904	0.0127441	0.0240985	0.00853087	0.00539566	0.0232599	0.0438993	0.00920216	0.00528429	0.00181612	0.027304	0.00672888	0.0132797	0.0515464	0.057635	0.101833	0.00196637	0.00489752	-0.00360232	0.225236	0	0	0	0	0.329975
0.199754	1.19152	0.212183	-0.115934	0.470977	0.0108095	0.00852643	0.0184302	0.183586	0.116396	0.0550409	-0.00283306	0.00536895	0.012744	0.0240967	0.00853054	0.00539524	0.023259	0.0438962	0.00920137	0.00524551	0.00171132	0.027304	0.00672888	0.01328	0.0515472	0.0576349	0.101833	0.00196637	0.00489752	-0.00366423	0.225236	0	0	0	0	0.330624
0.199772	1.19714	0.211335	-0.131126	0.481015	0.0113398	0.00837537	0.0181568	0.187857	0.115458	0.0551634	-0.00290362	0.00536886	0.0127439	0.0240949	0.0085302	0.00539481	0.0232581	0.0438931	0.00920058	0.00520605	0.00160466	0.027304	0.00672888	0.0132803	0.0515481	0.0576349	0.101833	0.00196637	0.00489752	-0.00372724	0.225236	0	0	0	0	0.330852
0.200033	1.20297	0.210369	-0.144074	0.490985	0.0118686	0.00819771	0.0178664	0.192264	0.114988	0.0552934	-0.00297332	0.00536878	0.0127438	0.0240932	0.00852986	0.00539439	0.0232572	0.0438899	0.00919979	0.00516706	0.0014993	0.0273039	0.00672888	0.0132807	0.0515489	0.0576348	0.101833	0.00196637	0.00489752	-0.00378949	0.225236	0	0	0	0	0.330565
0.20012	1.2091	0.209282	-0.15505	0.501042	0.0124018	0.00798908	0.0175609	0.196843	0.114952	0.0554312	-0.00304364	0.00536869	0.0127436	0.0240914	0.00852952	0.00539397	0.0232563	0.0438868	0.009199	0.00512773	0.001393	0.0273039	0.00672888	0.013281	0.0515498	0.0576347	0.101833	0.00196637	0.00489752	-0.00385228	0.225236	0	0	0	0	0.32979
0.2002	1.21549	0.208073	-0.16375	0.511104	0.0129353	0.00774826	0.0172413	0.20157	0.115397	0.0555765	-0.00311399	0.0053686	0.0127435	0.0240897	0.00852918	0.00539354	0.0232554	0.0438836	0.00919821	0.00508838	0.00128666	0.0273038	0.00672888	0.0132814	0.0515506	0.0576347	0.101833	0.00196637	0.00489752	-0.00391511	0.225236	0	0	0	0	0.328487
0.199944	1.2222	0.206732	-0.170305	0.521299	0.0134743	0.00747073	0.0169076	0.206486	0.116317	0.0557299	-0.00318552	0.00536851	0.0127434	0.0240879	0.00852883	0.00539311	0.0232544	0.0438804	0.0091974	0.00504837	0.00117853	0.0273038	0.00672888	0.0132817	0.0515515	0.0576346	0.101833	0.00196637	0.00489752	-0.00397898	0.225236	0	0	0	0	0.32665
0.199478	1.22923	0.205256	-0.17442	0.531564	0.0140155	0.00715463	0.0165603	0.211574	0.117759	0.0558913	-0.0032578	0.00536842	0.0127432	0.024086	0.00852848	0.00539267	0.0232535	0.0438772	0.00919658	0.00500795	0.00106928	0.0273038	0.00672888	0.0132821	0.0515524	0.0576345	0.101833	0.00196637	0.00489752	-0.00404353	0.225236	0	0	0	0	0.324233
0.199006	1.23653	0.203642	-0.175767	0.541795	0.0145535	0.00679899	0.0162013	0.216803	0.119769	0.0560599	-0.00333011	0.00536833	0.0127431	0.0240842	0.00852813	0.00539223	0.0232525	0.0438739	0.00919577	0.00496751	0.000959977	0.0273037	0.00672888	0.0132824	0.0515533	0.0576345	0.101833	0.00196637	0.00489752	-0.0041081	0.225236	0	0	0	0	0.32119
0.198994	1.24399	0.201904	-0.173894	0.551764	0.0150765	0.00640616	0.0158354	0.222086	0.122393	0.0562336	-0.00340078	0.00536824	0.012743	0.0240824	0.00852779	0.00539181	0.0232516	0.0438708	0.00919497	0.00492798	0.000853153	0.0273037	0.00672888	0.0132828	0.0515541	0.0576344	0.101832	0.00196637	0.00489752	-0.00417121	0.225236	0	0	0	0	0.317481

## Sheet: Pec_De-stat
Table S2_Pec_De-stat. Production of metabolites per carbohydrate consumed (mol/mol-carbs) and biomass yield (gDW/g-(fiber+mucin)) during De-stat experiment in apple pectin plus mucin medium. Metabolite abbreviations in the tab 'metabolite abbreviations'. Negative value indicate consumption of metabolite.
D	ace	but	etOH	for	isobut	isoval	lact	prop	suc	valer	ala	arg	asp	asn	cys	gln	glu	gly	his	ile	leu	lys	met	phe	pro	ser	thr	trp	tyr	val	muc	CH4	CO2	H2	H2S	Yxs
0.195556	1.21288	0.122551	0.0785296	0.246349	0.000168425	0.00175228	0.027186	0.214978	0.199866	0.00399925	-0.00848142	0.00541668	0.012767	0.0241411	0.182246	0.00539181	0.0175117	0.0440448	-0.0076231	0.00571099	0.00853078	0.0272435	0.00130998	0.0132681	0.0514281	0.0574393	0.101812	0.00196637	0.00480765	-0.0010471	0.225236	0	0.350277	0.0909783	0.0122433	0.370341
0.186479	1.21295	0.122912	0.0789669	0.24415	0.000190196	0.00187044	0.0266688	0.216221	0.199517	0.00446849	-0.00827857	0.00541626	0.012767	0.0241448	0.182246	0.00539282	0.017573	0.044049	-0.00744999	0.0057381	0.00859042	0.027244	0.00134611	0.0132682	0.0514286	0.0574415	0.101812	0.00196637	0.00480765	-0.0010471	0.225236	0	0.366024	0.0942435	0.012842	0.368342
0.188715	1.21298	0.123124	0.0792255	0.242909	0.000202911	0.00194005	0.0263767	0.21696	0.199314	0.00475301	-0.00816035	0.00541601	0.012767	0.024147	0.182247	0.00539341	0.0176087	0.0440515	-0.0073491	0.00575391	0.00862518	0.0272443	0.00136717	0.0132682	0.051429	0.0574428	0.101812	0.00196637	0.00480765	-0.0010471	0.225236	0	0.359998	0.091859	0.0126915	0.368947
0.195734	1.21301	0.123276	0.0794118	0.242055	0.000211958	0.00199	0.0261753	0.217494	0.199172	0.00496287	-0.00807639	0.00541583	0.012767	0.0241486	0.182247	0.00539383	0.017634	0.0440532	-0.00727745	0.00576513	0.00864986	0.0272446	0.00138213	0.0132682	0.0514292	0.0574437	0.101813	0.00196637	0.00480765	-0.0010471	0.225236	0	0.345058	0.087225	0.012237	0.370616
0.188908	1.21307	0.123607	0.0798156	0.240084	0.000231887	0.0020988	0.0257115	0.218646	0.198853	0.00540445	-0.00789096	0.00541545	0.012767	0.024152	0.182247	0.00539476	0.0176901	0.0440571	-0.0071192	0.00578992	0.00870438	0.0272451	0.00141517	0.0132682	0.0514297	0.0574457	0.101813	0.00196637	0.00480765	-0.0010471	0.225236	0	0.354993	0.0888634	0.0126787	0.369291
0.189246	1.21311	0.123846	0.0801082	0.238705	0.000246189	0.00217739	0.0253864	0.219483	0.198627	0.00573074	-0.00775809	0.00541517	0.012767	0.0241545	0.182248	0.00539543	0.0177302	0.0440599	-0.00700581	0.00580768	0.00874344	0.0272454	0.00143884	0.0132682	0.0514301	0.0574471	0.101813	0.00196637	0.00480765	-0.0010471	0.225236	0	0.351488	0.0870464	0.0126546	0.369574
0.193244	1.21315	0.124038	0.0803436	0.237629	0.000257595	0.00224044	0.0251328	0.22016	0.198447	0.00599803	-0.00765227	0.00541495	0.012767	0.0241564	0.182248	0.00539596	0.0177621	0.0440621	-0.0069155	0.00582183	0.00877455	0.0272457	0.00145769	0.0132683	0.0514304	0.0574483	0.101813	0.00196637	0.00480765	-0.0010471	0.225236	0	0.341483	0.0835887	0.0123904	0.370635
0.184783	1.21321	0.124397	0.0807818	0.23554	0.000279071	0.00235824	0.0246408	0.221413	0.198105	0.00648512	-0.00745266	0.00541453	0.012767	0.0241601	0.182249	0.00539696	0.0178224	0.0440663	-0.00674515	0.00584851	0.00883323	0.0272462	0.00149325	0.0132683	0.051431	0.0574505	0.101814	0.00196637	0.00480765	-0.0010471	0.225236	0	0.354479	0.0857827	0.0129542	0.368917
0.184688	1.21326	0.124643	0.0810847	0.234152	0.000293749	0.00243938	0.0243137	0.222284	0.197873	0.00682987	-0.00731648	0.00541425	0.012767	0.0241627	0.182249	0.00539764	0.0178636	0.0440691	-0.00662893	0.00586672	0.00887327	0.0272466	0.00151751	0.0132683	0.0514314	0.0574519	0.101814	0.00196637	0.00480765	-0.0010471	0.225236	0	0.352284	0.0843105	0.0129562	0.369025
0.184793	1.2133	0.124888	0.0813853	0.232791	0.000308264	0.00251979	0.0239927	0.223149	0.197645	0.00717454	-0.00718188	0.00541396	0.012767	0.0241652	0.182249	0.00539831	0.0179042	0.0440719	-0.00651407	0.00588471	0.00891284	0.027247	0.00154149	0.0132683	0.0514317	0.0574534	0.101814	0.00196637	0.00480765	-0.0010471	0.225236	0	0.350034	0.0828875	0.0129441	0.369133
0.182174	1.21335	0.125171	0.0817346	0.231205	0.000325139	0.00261325	0.0236187	0.224154	0.197379	0.00757495	-0.00702538	0.00541364	0.012767	0.0241681	0.18225	0.0053991	0.0179515	0.0440752	-0.00638051	0.00590563	0.00895885	0.0272474	0.00156937	0.0132683	0.0514322	0.0574551	0.101814	0.00196637	0.00480765	-0.0010471	0.225236	0	0.353369	0.0828451	0.0131255	0.36856
0.180099	1.2134	0.125449	0.0820767	0.229673	0.000341599	0.00270466	0.0232572	0.22514	0.19712	0.00797063	-0.00687282	0.00541332	0.012767	0.0241709	0.18225	0.00539986	0.0179976	0.0440784	-0.00625031	0.00592603	0.0090037	0.0272478	0.00159655	0.0132684	0.0514326	0.0574568	0.101815	0.00196637	0.00480765	-0.0010471	0.225236	0	0.35615	0.0827306	0.0132719	0.368048
0.180065	1.21344	0.125697	0.0823833	0.22833	0.000356257	0.00278641	0.0229402	0.226026	0.196891	0.00833028	-0.00673711	0.00541303	0.012767	0.0241734	0.18225	0.00540054	0.0180386	0.0440812	-0.00613449	0.00594417	0.0090436	0.0272482	0.00162073	0.0132684	0.051433	0.0574582	0.101815	0.00196637	0.00480765	-0.0010471	0.225236	0	0.355397	0.0818735	0.0132698	0.367958
0.177669	1.21349	0.125982	0.0827349	0.226786	0.000373074	0.00288019	0.022576	0.227042	0.196627	0.00874279	-0.00658139	0.00541271	0.012767	0.0241763	0.182251	0.00540132	0.0180856	0.0440844	-0.00600161	0.00596498	0.00908938	0.0272486	0.00164847	0.0132684	0.0514334	0.0574599	0.101815	0.00196637	0.00480765	-0.0010471	0.225236	0	0.35988	0.0823091	0.0134441	0.367227
0.180228	1.21353	0.126191	0.0829958	0.225693	0.000385388	0.00294946	0.0223176	0.2278	0.196436	0.00905721	-0.00646761	0.00541247	0.012767	0.0241784	0.182251	0.00540189	0.01812	0.0440868	-0.0059045	0.00598019	0.00912284	0.0272489	0.00166874	0.0132684	0.0514337	0.0574612	0.101816	0.00196637	0.00480765	-0.0010471	0.225236	0	0.355018	0.0807109	0.0132487	0.367627
0.177738	1.21358	0.126479	0.0833518	0.224163	0.000402304	0.00304421	0.0219564	0.228831	0.196172	0.00948098	-0.00631113	0.00541214	0.012767	0.0241813	0.182251	0.00540268	0.0181673	0.0440901	-0.00577096	0.00600111	0.00916884	0.0272493	0.00169662	0.0132685	0.0514342	0.0574629	0.101816	0.00196637	0.00480765	-0.0010471	0.225236	0	0.360255	0.081395	0.0134299	0.366791
0.175601	1.21363	0.126762	0.0837039	0.222672	0.000418961	0.00313775	0.0216042	0.229853	0.195913	0.00990385	-0.00615715	0.00541182	0.012767	0.0241842	0.182252	0.00540345	0.0182138	0.0440933	-0.00563955	0.0060217	0.00921411	0.0272497	0.00172405	0.0132685	0.0514346	0.0574645	0.101816	0.00196637	0.00480765	-0.0010471	0.225236	0	0.36399	0.0815255	0.0135888	0.366125
0.175734	1.21367	0.12701	0.0840125	0.221389	0.000433495	0.00321964	0.021301	0.230751	0.195687	0.0102773	-0.00602289	0.00541154	0.012767	0.0241867	0.182252	0.00540412	0.0182543	0.0440961	-0.00552497	0.00603964	0.00925358	0.0272501	0.00174796	0.0132685	0.051435	0.057466	0.101816	0.00196637	0.00480765	-0.0010471	0.225236	0	0.363037	0.0805947	0.0135741	0.36603
0.173467	1.21372	0.127295	0.0843658	0.219877	0.000450312	0.00331374	0.0209437	0.231773	0.195425	0.0106933	-0.00586732	0.00541122	0.012767	0.0241896	0.182253	0.0054049	0.0183013	0.0440993	-0.00539221	0.00606044	0.00929932	0.0272505	0.00177568	0.0132685	0.0514354	0.0574677	0.101817	0.00196637	0.00480765	-0.0010471	0.225236	0	0.367099	0.0807718	0.0137472	0.365337
0.173638	1.21377	0.127542	0.0846713	0.218592	0.000464796	0.00339501	0.0206398	0.232659	0.195199	0.0110555	-0.00573342	0.00541094	0.012767	0.0241921	0.182253	0.00540557	0.0183418	0.0441021	-0.00527794	0.00607834	0.00933868	0.0272509	0.00179953	0.0132686	0.0514358	0.0574691	0.101817	0.00196637	0.00480765	-0.0010471	0.225236	0	0.366058	0.0798206	0.0137293	0.365265
0.171637	1.21382	0.127824	0.0850216	0.217112	0.00048141	0.00348818	0.0202902	0.233673	0.194941	0.0114706	-0.00557981	0.00541062	0.012767	0.0241949	0.182253	0.00540634	0.0183882	0.0441053	-0.00514685	0.00609888	0.00938385	0.0272513	0.0018269	0.0132686	0.0514362	0.0574708	0.101817	0.00196637	0.00480765	-0.0010471	0.225236	0	0.369641	0.0798735	0.0138851	0.364622
0.168981	1.21387	0.128119	0.0853875	0.215573	0.000498744	0.00358548	0.0199264	0.234734	0.194671	0.0119054	-0.00541958	0.00541028	0.012767	0.0241979	0.182254	0.00540714	0.0184366	0.0441087	-0.0050101	0.0061203	0.00943095	0.0272517	0.00185545	0.0132686	0.0514367	0.0574725	0.101818	0.00196637	0.00480765	-0.0010471	0.225236	0	0.374759	0.0802415	0.0140991	0.363786
0.169209	1.21391	0.128365	0.0856938	0.214312	0.000513174	0.00366678	0.0196281	0.235624	0.194447	0.0122731	-0.00528631	0.00541	0.012767	0.0242004	0.182254	0.00540781	0.0184768	0.0441115	-0.00489637	0.00613811	0.00947013	0.0272521	0.00187919	0.0132686	0.0514371	0.057474	0.101818	0.00196637	0.00480765	-0.0010471	0.225236	0	0.373564	0.0792507	0.014076	0.363721
0.164699	1.21397	0.128695	0.0861041	0.212598	0.000532572	0.00377581	0.0192228	0.236815	0.194146	0.012763	-0.00510704	0.00540963	0.012767	0.0242037	0.182255	0.00540871	0.018531	0.0441152	-0.00474339	0.00616208	0.00952284	0.0272525	0.00191112	0.0132686	0.0514376	0.0574759	0.101818	0.00196637	0.00480765	-0.0010471	0.225236	0	0.383089	0.080518	0.0144572	0.362334
0.167029	1.21401	0.128904	0.086365	0.211555	0.000544768	0.0038449	0.018976	0.237575	0.193958	0.0130813	-0.00499455	0.00540939	0.012767	0.0242058	0.182255	0.00540927	0.0185649	0.0441176	-0.00464739	0.00617711	0.00955591	0.0272528	0.00193116	0.0132687	0.0514379	0.0574772	0.101818	0.00196637	0.00480765	-0.0010471	0.225236	0	0.377053	0.0785083	0.0142515	0.362856
0.162513	1.21406	0.129238	0.0867799	0.209844	0.000564311	0.00395502	0.0185713	0.238781	0.193655	0.0135807	-0.00481406	0.00540902	0.012767	0.0242091	0.182255	0.00541017	0.0186195	0.0441213	-0.00449335	0.00620124	0.00960897	0.0272533	0.00196332	0.0132687	0.0514384	0.0574791	0.101819	0.00196637	0.00480765	-0.0010471	0.225236	0	0.386822	0.0797823	0.0146434	0.361428
0.164814	1.2141	0.129447	0.0870413	0.208814	0.000576478	0.00402414	0.0183274	0.239544	0.193467	0.0139025	-0.0047019	0.00540878	0.012767	0.0242112	0.182256	0.00541074	0.0186533	0.0441237	-0.00439764	0.00621623	0.00964195	0.0272536	0.0019833	0.0132687	0.0514387	0.0574803	0.101819	0.00196637	0.00480765	-0.0010471	0.225236	0	0.380726	0.0777772	0.014435	0.361951
0.162507	1.21415	0.129741	0.0874088	0.207331	0.000593685	0.00412149	0.0179763	0.240615	0.193202	0.0143504	-0.00454314	0.00540845	0.012767	0.0242142	0.182256	0.00541153	0.0187013	0.044127	-0.00426215	0.00623746	0.00968862	0.0272541	0.00201158	0.0132687	0.0514392	0.0574821	0.101819	0.00196637	0.00480765	-0.0010471	0.225236	0	0.385427	0.0779808	0.014636	0.361138
0.162281	1.2142	0.129998	0.0877295	0.206059	0.000608625	0.0042063	0.0176753	0.24155	0.192972	0.014745	-0.00440539	0.00540816	0.012767	0.0242167	0.182256	0.00541222	0.0187429	0.0441299	-0.00414459	0.00625587	0.00972912	0.0272544	0.00203612	0.0132688	0.0514396	0.0574836	0.101819	0.00196637	0.00480765	-0.0010471	0.225236	0	0.385262	0.077191	0.0146525	0.360921
0.162514	1.21424	0.130246	0.0880401	0.204838	0.000623061	0.00428838	0.0173862	0.242458	0.19275	0.0151295	-0.00427235	0.00540788	0.012767	0.0242192	0.182257	0.00541289	0.0187831	0.0441326	-0.00403106	0.00627366	0.00976823	0.0272548	0.00205982	0.0132688	0.0514399	0.057485	0.10182	0.00196637	0.00480765	-0.0010471	0.225236	0	0.384012	0.0761868	0.0146278	0.360834
0.1604	1.21429	0.130539	0.0884069	0.203387	0.000640134	0.00438537	0.0170425	0.243529	0.192487	0.0155825	-0.00411496	0.00540755	0.012767	0.0242221	0.182257	0.00541368	0.0188306	0.0441359	-0.00389673	0.0062947	0.00981451	0.0272552	0.00208786	0.0132688	0.0514404	0.0574867	0.10182	0.00196637	0.00480765	-0.0010471	0.225236	0	0.388369	0.0762887	0.0148168	0.36005
0.158172	1.21434	0.130836	0.0887788	0.201924	0.000657411	0.00448363	0.0166962	0.244616	0.192221	0.0160437	-0.00395574	0.00540722	0.012767	0.0242251	0.182258	0.00541447	0.0188787	0.0441392	-0.00376086	0.00631598	0.00986131	0.0272556	0.00211623	0.0132688	0.0514408	0.0574885	0.10182	0.00196637	0.00480765	-0.0010471	0.225236	0	0.393128	0.0764517	0.0150218	0.35921
0.153508	1.2144	0.131186	0.0892163	0.200198	0.000677749	0.00459924	0.0162874	0.245895	0.191908	0.0165859	-0.00376828	0.00540683	0.012767	0.0242285	0.182258	0.00541541	0.0189353	0.0441431	-0.00360088	0.00634104	0.00991643	0.0272561	0.00214962	0.0132689	0.0514413	0.0574905	0.101821	0.00196637	0.00480765	-0.0010471	0.225236	0	0.404343	0.0778385	0.0154745	0.357565
0.158084	1.21443	0.131345	0.0894184	0.199464	0.000686934	0.00465226	0.0161132	0.24649	0.191769	0.0168476	-0.00368393	0.00540665	0.012767	0.0242301	0.182258	0.00541583	0.0189608	0.0441449	-0.00352889	0.00635232	0.00994123	0.0272564	0.00216465	0.0132689	0.0514416	0.0574914	0.101821	0.00196637	0.00480765	-0.0010471	0.225236	0	0.391932	0.0746794	0.015023	0.358846
0.15596	1.21448	0.131643	0.0897918	0.198023	0.000704176	0.00475072	0.0157719	0.247585	0.191505	0.017317	-0.00352517	0.00540632	0.012767	0.0242331	0.182259	0.00541663	0.0190088	0.0441482	-0.0033934	0.00637354	0.0099879	0.0272568	0.00219294	0.0132689	0.051442	0.0574931	0.101821	0.00196637	0.00480765	-0.0010471	0.225236	0	0.396556	0.0747812	0.0152241	0.358008
0.156016	1.21452	0.131896	0.0901109	0.196816	0.00071883	0.00483471	0.0154857	0.248522	0.191281	0.017723	-0.00339036	0.00540604	0.012767	0.0242356	0.182259	0.0054173	0.0190495	0.044151	-0.00327836	0.00639156	0.0100275	0.0272572	0.00221695	0.0132689	0.0514424	0.0574946	0.101821	0.00196637	0.00480765	-0.0010471	0.225236	0	0.395703	0.0738422	0.0152152	0.357847
0.153611	1.21458	0.132202	0.0904949	0.195351	0.0007365	0.00493585	0.0151384	0.249649	0.191011	0.0182098	-0.00322775	0.0054057	0.012767	0.0242386	0.18226	0.00541812	0.0190986	0.0441544	-0.00313958	0.0064133	0.0100753	0.0272576	0.00224592	0.0132689	0.0514429	0.0574964	0.101822	0.00196637	0.00480765	-0.0010471	0.225236	0	0.401179	0.0740749	0.01545	0.356894
0.153857	1.21462	0.132452	0.0908104	0.194173	0.000750924	0.00501877	0.0148593	0.250577	0.190791	0.0186155	-0.00309514	0.00540542	0.012767	0.024241	0.18226	0.00541878	0.0191387	0.0441572	-0.00302641	0.00643103	0.0101143	0.0272579	0.00226955	0.013269	0.0514432	0.0574978	0.101822	0.00196637	0.00480765	-0.0010471	0.225236	0	0.399823	0.0730374	0.015422	0.356787
0.153912	1.21466	0.132706	0.0911317	0.192979	0.00076559	0.00510317	0.0145762	0.251523	0.190568	0.0190302	-0.00296034	0.00540514	0.012767	0.0242435	0.18226	0.00541946	0.0191794	0.04416	-0.00291137	0.00644905	0.010154	0.0272583	0.00229356	0.013269	0.0514436	0.0574993	0.101822	0.00196637	0.00480765	-0.0010471	0.225236	0	0.398969	0.0720952	0.0154133	0.356614
0.149574	1.21472	0.133057	0.0915738	0.191308	0.000785863	0.00521947	0.0141801	0.252823	0.190259	0.0195957	-0.00277387	0.00540475	0.012767	0.024247	0.182261	0.00542039	0.0192357	0.0441639	-0.00275224	0.00647397	0.0102088	0.0272588	0.00232678	0.013269	0.0514441	0.0575013	0.101822	0.00196637	0.00480765	-0.0010471	0.225236	0	0.40981	0.0732461	0.0158571	0.354975
0.151799	1.21476	0.133264	0.0918364	0.190365	0.000797728	0.00528823	0.0139562	0.253599	0.190079	0.0199422	-0.00266498	0.00540452	0.012767	0.024249	0.182261	0.00542094	0.0192686	0.0441662	-0.00265932	0.00648853	0.0102408	0.0272591	0.00234618	0.013269	0.0514445	0.0575025	0.101823	0.00196637	0.00480765	-0.0010471	0.225236	0	0.403086	0.0712485	0.0156216	0.355526
0.151724	1.2148	0.133522	0.0921635	0.18917	0.000812571	0.00537398	0.0136728	0.254565	0.189854	0.0203703	-0.00252867	0.00540424	0.012767	0.0242515	0.182261	0.00542162	0.0193098	0.044169	-0.00254299	0.00650675	0.0102809	0.0272595	0.00237046	0.013269	0.0514448	0.057504	0.101823	0.00196637	0.00480765	-0.0010471	0.225236	0	0.402572	0.070362	0.0156263	0.355298
0.149248	1.21486	0.133835	0.0925585	0.187714	0.000830537	0.00547761	0.0133276	0.25573	0.189581	0.0208853	-0.00236363	0.00540389	0.012767	0.0242546	0.182262	0.00542245	0.0193596	0.0441725	-0.00240214	0.00652882	0.0103294	0.0272599	0.00239987	0.0132691	0.0514453	0.0575057	0.101823	0.00196637	0.00480765	-0.0010471	0.225236	0	0.408526	0.0705943	0.0158826	0.354254
0.14948	1.2149	0.134087	0.0928786	0.186562	0.000844988	0.00556137	0.0130542	0.256677	0.189362	0.0213091	-0.00223101	0.00540362	0.012767	0.0242571	0.182262	0.00542311	0.0193997	0.0441752	-0.00228896	0.00654654	0.0103684	0.0272603	0.00242349	0.0132691	0.0514457	0.0575072	0.101824	0.00196637	0.00480765	-0.0010471	0.225236	0	0.407173	0.0695538	0.0158551	0.354122
0.155595	1.21492	0.134211	0.0930386	0.186038	0.000852016	0.00560288	0.0129296	0.257156	0.189258	0.0215335	-0.0021668	0.00540348	0.012767	0.0242583	0.182262	0.00542343	0.0194191	0.0441766	-0.00223416	0.00655513	0.0103873	0.0272604	0.00243493	0.0132691	0.0514459	0.0575079	0.101824	0.00196637	0.00480765	-0.0010471	0.225236	0	0.390474	0.0659265	0.015229	0.355912
0.147396	1.21499	0.134652	0.0935955	0.184009	0.000877307	0.00574893	0.0124482	0.258799	0.188874	0.0222583	-0.00193453	0.005403	0.012767	0.0242626	0.182263	0.0054246	0.0194892	0.0441814	-0.00203595	0.00658618	0.0104555	0.0272611	0.00247631	0.0132691	0.0514465	0.0575104	0.101824	0.00196637	0.00480765	-0.0010471	0.225236	0	0.411431	0.0686463	0.0160719	0.352962
0.145265	1.21505	0.134962	0.0939906	0.182652	0.000895029	0.00585216	0.0121254	0.259969	0.188608	0.022781	-0.00177215	0.00540266	0.012767	0.0242656	0.182263	0.00542541	0.0195383	0.0441848	-0.00189736	0.00660788	0.0105033	0.0272615	0.00250524	0.0132692	0.051447	0.0575122	0.101824	0.00196637	0.00480765	-0.0010471	0.225236	0	0.416661	0.0686882	0.0163021	0.351972
0.147641	1.21508	0.135166	0.0942521	0.181815	0.000906567	0.00592015	0.0119258	0.260749	0.188437	0.023137	-0.00166673	0.00540244	0.012767	0.0242675	0.182264	0.00542594	0.0195701	0.044187	-0.0018074	0.00662198	0.0105343	0.0272618	0.00252402	0.0132692	0.0514473	0.0575133	0.101825	0.00196637	0.00480765	-0.0010471	0.225236	0	0.409131	0.0666289	0.0160331	0.352582
0.145191	1.21513	0.135485	0.094659	0.180437	0.000924738	0.00602631	0.011598	0.261957	0.188164	0.023681	-0.00150034	0.00540209	0.012767	0.0242706	0.182264	0.00542677	0.0196204	0.0441905	-0.0016654	0.00664422	0.0105832	0.0272622	0.00255366	0.0132692	0.0514477	0.0575151	0.101825	0.00196637	0.00480765	-0.0010471	0.225236	0	0.415209	0.066981	0.0162958	0.351471
0.14274	1.21519	0.135807	0.0950699	0.179059	0.000943034	0.00613342	0.0112701	0.263178	0.18789	0.0242339	-0.00133288	0.00540174	0.012767	0.0242737	0.182264	0.00542761	0.019671	0.044194	-0.00152249	0.00666661	0.0106324	0.0272627	0.00258349	0.0132692	0.0514482	0.0575169	0.101825	0.00196637	0.00480765	-0.0010471	0.225236	0	0.421497	0.0674864	0.0165663	0.350325
0.144871	1.21522	0.136017	0.0953391	0.178218	0.000954816	0.00620321	0.0110695	0.263983	0.187716	0.0246077	-0.00122536	0.00540151	0.012767	0.0242757	0.182265	0.00542815	0.0197035	0.0441962	-0.00143073	0.00668098	0.010664	0.027263	0.00260265	0.0132693	0.0514485	0.0575181	0.101825	0.00196637	0.00480765	-0.0010471	0.225236	0	0.41442	0.0657687	0.0163122	0.350862
0.142846	1.21528	0.136329	0.0957393	0.176903	0.000972525	0.00630731	0.0107566	0.265175	0.187452	0.0251536	-0.00106342	0.00540117	0.012767	0.0242787	0.182265	0.00542896	0.0197524	0.0441996	-0.00129254	0.00670263	0.0107116	0.0272634	0.0026315	0.0132693	0.051449	0.0575199	0.101826	0.00196637	0.00480765	-0.0010471	0.225236	0	0.419355	0.0658645	0.0165317	0.349873
0.140589	1.21533	0.13665	0.0961503	0.175563	0.000990671	0.00641414	0.0104375	0.266401	0.187182	0.0257176	-0.000897554	0.00540083	0.012767	0.0242818	0.182266	0.00542979	0.0198025	0.0442031	-0.00115098	0.0067248	0.0107604	0.0272639	0.00266105	0.0132693	0.0514494	0.0575217	0.101826	0.00196637	0.00480765	-0.0010471	0.225236	0	0.425078	0.0659598	0.0167839	0.348774
0.142806	1.21536	0.136857	0.0964175	0.174753	0.00100225	0.00648319	0.0102442	0.267204	0.187012	0.0260973	-0.000792034	0.00540061	0.012767	0.0242838	0.182266	0.00543032	0.0198343	0.0442053	-0.00106093	0.00673891	0.0107914	0.0272641	0.00267985	0.0132693	0.0514497	0.0575228	0.101826	0.00196637	0.00480765	-0.0010471	0.225236	0	0.417441	0.0639363	0.0165091	0.349365
0.131933	1.21546	0.137418	0.097135	0.172346	0.00103413	0.00667004	0.00967155	0.269339	0.186535	0.0270721	-0.000500292	0.0054	0.012767	0.0242892	0.182267	0.00543178	0.0199225	0.0442113	-0.000811955	0.00677791	0.0108772	0.0272649	0.00273182	0.0132694	0.0514505	0.057526	0.101827	0.00196637	0.00480765	-0.0010471	0.225236	0	0.450692	0.0681499	0.0178529	0.344746
0.134357	1.21549	0.137612	0.0973875	0.171611	0.00104495	0.00673505	0.00949584	0.270101	0.186377	0.0274403	-0.000401902	0.00539979	0.012767	0.024291	0.182267	0.00543227	0.0199522	0.0442134	-0.000727988	0.00679106	0.0109061	0.0272652	0.00274935	0.0132694	0.0514508	0.0575271	0.101827	0.00196637	0.00480765	-0.0010471	0.225236	0	0.441405	0.0659077	0.0175131	0.345531
0.132003	1.21554	0.137946	0.0978179	0.170257	0.00106373	0.00684648	0.00917326	0.271391	0.186099	0.0280472	-0.000230522	0.00539943	0.012767	0.0242942	0.182267	0.00543313	0.020004	0.044217	-0.000581732	0.00681397	0.0109565	0.0272656	0.00277988	0.0132694	0.0514513	0.0575289	0.101827	0.00196637	0.00480765	-0.0010471	0.225236	0	0.448075	0.0660794	0.017806	0.344276
0.1319	1.21559	0.138215	0.0981662	0.169202	0.00107877	0.00693636	0.00892147	0.27244	0.185878	0.0285493	-9.34902e-05	0.00539915	0.012767	0.0242968	0.182268	0.00543382	0.0200453	0.0442198	-0.000464788	0.00683229	0.0109968	0.027266	0.00280429	0.0132694	0.0514517	0.0575304	0.101828	0.00196637	0.00480765	-0.0010471	0.225236	0	0.4472	0.0651567	0.0177992	0.343976
0.131582	1.21563	0.138491	0.0985238	0.168123	0.00109418	0.00702859	0.00866411	0.273517	0.185652	0.0290676	4.69022e-05	0.00539885	0.012767	0.0242994	0.182268	0.00543452	0.0200877	0.0442228	-0.000344976	0.00685106	0.0110381	0.0272664	0.0028293	0.0132694	0.0514521	0.0575319	0.101828	0.00196637	0.00480765	-0.0010471	0.225236	0	0.44703	0.0643703	0.0178202	0.343573
0.12954	1.21569	0.138821	0.09895	0.16682	0.00111261	0.00713859	0.0083534	0.2748	0.185381	0.0296825	0.000214781	0.0053985	0.012767	0.0243025	0.182268	0.00543536	0.0201385	0.0442263	-0.000201707	0.0068735	0.0110874	0.0272668	0.00285921	0.0132695	0.0514526	0.0575338	0.101828	0.00196637	0.00480765	-0.0010471	0.225236	0	0.452814	0.0644669	0.0180786	0.342384
0.13638	1.2157	0.138887	0.0990404	0.166664	0.00111604	0.00716099	0.0083153	0.275086	0.185334	0.0298457	0.000245342	0.00539844	0.012767	0.024303	0.182269	0.00543551	0.0201477	0.0442269	-0.000175626	0.00687758	0.0110964	0.0272669	0.00286465	0.0132695	0.0514526	0.0575341	0.101828	0.00196637	0.00480765	-0.0010471	0.225236	0	0.428922	0.0604043	0.0171508	0.345018
0.123089	1.21581	0.139567	0.0999174	0.163867	0.00115437	0.00738813	0.0076494	0.277714	0.184767	0.031085	0.000595224	0.00539771	0.012767	0.0243095	0.182269	0.00543727	0.0202534	0.0442342	0.000122965	0.00692436	0.0111993	0.0272679	0.00292699	0.0132695	0.0514536	0.0575379	0.101829	0.00196637	0.00480765	-0.0010471	0.225236	0	0.473946	0.0660574	0.0189795	0.338714
0.127109	1.21583	0.139702	0.100097	0.163425	0.00116166	0.00743348	0.00754337	0.278267	0.184663	0.0313762	0.000661059	0.00539757	0.012767	0.0243108	0.18227	0.0054376	0.0202733	0.0442356	0.000179149	0.00693316	0.0112186	0.027268	0.00293871	0.0132695	0.0514538	0.0575386	0.101829	0.00196637	0.00480765	-0.0010471	0.225236	0	0.457718	0.0631401	0.0183571	0.340333
0.129448	1.21586	0.139897	0.100353	0.162727	0.00117236	0.00749888	0.0073765	0.27905	0.184509	0.0317756	0.000757985	0.00539737	0.012767	0.0243126	0.18227	0.00543808	0.0203025	0.0442376	0.000261867	0.00694611	0.0112471	0.0272683	0.00295598	0.0132696	0.0514541	0.0575397	0.101829	0.00196637	0.00480765	-0.0010471	0.225236	0	0.448206	0.0610713	0.0180038	0.341074
0.129523	1.21591	0.140164	0.100703	0.161727	0.00118713	0.00758846	0.00713771	0.280113	0.184294	0.0323075	0.000892203	0.00539709	0.012767	0.024315	0.18227	0.00543875	0.0203431	0.0442404	0.000376409	0.00696406	0.0112866	0.0272687	0.00297989	0.0132696	0.0514545	0.0575411	0.101829	0.00196637	0.00480765	-0.0010471	0.225236	0	0.446712	0.0601006	0.017972	0.340763
0.127953	1.21596	0.140483	0.101117	0.16051	0.00120485	0.00769507	0.00684703	0.281367	0.184036	0.0329213	0.00105329	0.00539675	0.012767	0.024318	0.182271	0.00543956	0.0203917	0.0442438	0.000513883	0.00698559	0.0113339	0.0272691	0.00300859	0.0132696	0.0514549	0.0575429	0.10183	0.00196637	0.00480765	-0.0010471	0.225236	0	0.450948	0.0598969	0.018171	0.339712
0.123415	1.21603	0.140902	0.101661	0.158874	0.00122826	0.00783516	0.00645677	0.283003	0.183692	0.0337056	0.00126656	0.0053963	0.012767	0.024322	0.182271	0.00544063	0.0204562	0.0442482	0.000695887	0.0070141	0.0113966	0.0272697	0.00304659	0.0132696	0.0514555	0.0575452	0.10183	0.00196637	0.00480765	-0.0010471	0.225236	0	0.466248	0.0611299	0.0188172	0.337221
0.120914	1.21609	0.141259	0.102124	0.157508	0.00124814	0.00795448	0.00613061	0.284402	0.183401	0.0343814	0.00144738	0.00539593	0.012767	0.0243254	0.182272	0.00544154	0.0205108	0.044252	0.000850204	0.00703827	0.0114498	0.0272702	0.0030788	0.0132697	0.051456	0.0575471	0.10183	0.00196637	0.00480765	-0.0010471	0.225236	0	0.474594	0.0614111	0.0191842	0.335636
0.120626	1.21613	0.141538	0.102488	0.156469	0.00126363	0.00804801	0.00588217	0.285505	0.183176	0.0349201	0.00158816	0.00539563	0.012767	0.024328	0.182272	0.00544224	0.0205533	0.0442549	0.000970345	0.00705709	0.0114912	0.0272705	0.00310388	0.0132697	0.0514564	0.0575487	0.101831	0.00196637	0.00480765	-0.0010471	0.225236	0	0.474432	0.0605781	0.019208	0.335161
0.122866	1.21616	0.141728	0.102737	0.155801	0.00127405	0.00811158	0.00572219	0.286261	0.183026	0.0352974	0.00168265	0.00539543	0.012767	0.0243297	0.182272	0.00544271	0.0205818	0.0442569	0.00105099	0.00706972	0.011519	0.0272708	0.00312071	0.0132697	0.0514567	0.0575497	0.101831	0.00196637	0.00480765	-0.0010471	0.225236	0	0.464519	0.0585178	0.0188364	0.335966
0.118563	1.21623	0.142154	0.10329	0.154179	0.00129774	0.00825399	0.00533493	0.287934	0.18268	0.0361094	0.00189809	0.00539498	0.012767	0.0243337	0.182273	0.00544379	0.0206469	0.0442614	0.00123484	0.00709852	0.0115823	0.0272714	0.00315909	0.0132697	0.0514573	0.057552	0.101831	0.00196637	0.00480765	-0.0010471	0.225236	0	0.480077	0.0596572	0.0194982	0.333414
0.120801	1.21626	0.142341	0.103537	0.153528	0.00130802	0.00831689	0.00517902	0.288686	0.182532	0.0364876	0.0019912	0.00539479	0.012767	0.0243354	0.182273	0.00544426	0.020675	0.0442633	0.0013143	0.00711097	0.0116097	0.0272716	0.00317568	0.0132698	0.0514576	0.0575531	0.101831	0.00196637	0.00480765	-0.0010471	0.225236	0	0.469914	0.0575914	0.0191157	0.334244
0.116615	1.21633	0.142769	0.104094	0.151918	0.00133177	0.00846008	0.00479426	0.290372	0.182186	0.0373118	0.00220711	0.00539434	0.012767	0.0243395	0.182274	0.00544534	0.0207403	0.0442678	0.00149856	0.00713983	0.0116732	0.0272722	0.00321415	0.0132698	0.0514582	0.0575554	0.101832	0.00196637	0.00480765	-0.0010471	0.225236	0	0.485476	0.0586696	0.01978	0.331677
0.116132	1.21638	0.143059	0.104473	0.150868	0.00134776	0.00855722	0.00454321	0.291525	0.181955	0.037885	0.0023522	0.00539403	0.012767	0.0243421	0.182274	0.00544607	0.0207841	0.0442709	0.00162238	0.00715923	0.0117158	0.0272726	0.00323999	0.0132698	0.0514586	0.057557	0.101832	0.00196637	0.00480765	-0.0010471	0.225236	0	0.486192	0.0579264	0.0198406	0.331063
0.111977	1.21645	0.1435	0.105049	0.149227	0.00137219	0.0087049	0.00415097	0.293269	0.181599	0.0387433	0.00257418	0.00539357	0.012767	0.0243463	0.182275	0.00544718	0.0208511	0.0442755	0.00181181	0.0071889	0.0117811	0.0272732	0.00327954	0.0132698	0.0514592	0.0575594	0.101833	0.00196637	0.00480765	-0.0010471	0.225236	0	0.502888	0.0590578	0.0205546	0.32833
0.11194	1.2165	0.143773	0.105408	0.148257	0.00138722	0.00879661	0.00391885	0.294363	0.181383	0.0392933	0.0027104	0.00539329	0.012767	0.0243488	0.182275	0.00544786	0.0208923	0.0442783	0.00192807	0.00720711	0.0118211	0.0272736	0.00330381	0.0132699	0.0514596	0.0575609	0.101833	0.00196637	0.00480765	-0.0010471	0.225236	0	0.501718	0.0580648	0.0205394	0.327954
0.111821	1.21654	0.14405	0.105772	0.147278	0.00140244	0.00888964	0.00368431	0.295474	0.181163	0.0398536	0.00284841	0.005393	0.012767	0.0243514	0.182275	0.00544855	0.020934	0.0442812	0.00204585	0.00722556	0.0118617	0.0272739	0.00332839	0.0132699	0.05146	0.0575624	0.101833	0.00196637	0.00480765	-0.0010471	0.225236	0	0.500924	0.0571189	0.0205396	0.327523
0.107537	1.21661	0.144513	0.106377	0.145583	0.00142799	0.00904463	0.00327909	0.297312	0.180793	0.0407669	0.00308033	0.00539251	0.012767	0.0243557	0.182276	0.00544971	0.021004	0.0442861	0.00224377	0.00725657	0.0119299	0.0272746	0.00336971	0.0132699	0.0514606	0.0575649	0.101834	0.00196637	0.00480765	-0.0010471	0.225236	0	0.519506	0.0583524	0.0213354	0.324517
0.109825	1.21664	0.144682	0.106603	0.145033	0.00143719	0.00910176	0.00314709	0.298007	0.180663	0.0411309	0.00316329	0.00539234	0.012767	0.0243572	0.182276	0.00545013	0.0210291	0.0442878	0.00231457	0.00726766	0.0119543	0.0272748	0.00338449	0.0132699	0.0514609	0.0575658	0.101834	0.00196637	0.00480765	-0.0010471	0.225236	0	0.507348	0.0561223	0.0208694	0.325584
0.109833	1.21669	0.144955	0.106963	0.144087	0.00145213	0.00919344	0.00292038	0.299108	0.180449	0.0416932	0.00329854	0.00539206	0.012767	0.0243597	0.182276	0.00545081	0.0210699	0.0442906	0.00242999	0.00728574	0.011994	0.0272751	0.00340858	0.01327	0.0514612	0.0575673	0.101834	0.00196637	0.00480765	-0.0010471	0.225236	0	0.505984	0.0551094	0.0208465	0.325214
0.109929	1.21673	0.145225	0.107318	0.143158	0.00146685	0.00928397	0.002698	0.300196	0.180238	0.0422518	0.00343182	0.00539178	0.012767	0.0243622	0.182277	0.00545147	0.0211102	0.0442934	0.00254373	0.00730355	0.0120332	0.0272755	0.00343233	0.01327	0.0514616	0.0575687	0.101834	0.00196637	0.00480765	-0.0010471	0.225236	0	0.504223	0.0540588	0.0208072	0.324893
0.107717	1.21679	0.145599	0.10781	0.141836	0.00148738	0.00940956	0.00238157	0.301699	0.179942	0.0430151	0.00361784	0.00539139	0.012767	0.0243656	0.182277	0.00545241	0.0211664	0.0442973	0.00270249	0.00732842	0.0120879	0.027276	0.00346547	0.01327	0.0514621	0.0575707	0.101835	0.00196637	0.00480765	-0.0010471	0.225236	0	0.513242	0.0541515	0.0212132	0.323131
0.107437	1.21683	0.145886	0.10819	0.140851	0.00150308	0.00950619	0.00214546	0.302864	0.179718	0.0436159	0.00375983	0.00539109	0.012767	0.0243683	0.182278	0.00545312	0.0212093	0.0443002	0.00282366	0.0073474	0.0121297	0.0272764	0.00349076	0.01327	0.0514625	0.0575723	0.101835	0.00196637	0.00480765	-0.0010471	0.225236	0	0.513247	0.053278	0.0212474	0.322564
0.105369	1.21689	0.146259	0.108682	0.139549	0.0015235	0.00963148	0.00183366	0.304368	0.179425	0.0443864	0.00394474	0.00539071	0.012767	0.0243717	0.182278	0.00545404	0.0212651	0.0443041	0.00298146	0.00737212	0.012184	0.0272769	0.0035237	0.0132701	0.0514631	0.0575743	0.101835	0.00196637	0.00480765	-0.0010471	0.225236	0	0.52197	0.0532944	0.0216432	0.320826
0.103022	1.21696	0.146651	0.109199	0.138185	0.00154493	0.00976306	0.00150715	0.30595	0.179118	0.0451985	0.00413873	0.0053903	0.012767	0.0243753	0.182279	0.00545501	0.0213237	0.0443082	0.00314701	0.00739805	0.0122411	0.0272774	0.00355826	0.0132701	0.0514636	0.0575764	0.101836	0.00196637	0.00480765	-0.0010471	0.225236	0	0.532491	0.0534615	0.0221149	0.318841
0.105439	1.21698	0.146807	0.109408	0.137708	0.00155329	0.00981575	0.00139235	0.306601	0.179001	0.0455541	0.00421389	0.00539014	0.012767	0.0243767	0.182279	0.00545539	0.0213464	0.0443097	0.00321116	0.0074081	0.0122632	0.0272776	0.00357165	0.0132701	0.0514638	0.0575772	0.101836	0.00196637	0.00480765	-0.0010471	0.225236	0	0.518953	0.0512181	0.0215873	0.320071
0.100883	1.21706	0.147314	0.110077	0.13593	0.00158105	0.00998606	0.000966826	0.308647	0.178602	0.0466027	0.00446533	0.00538962	0.012767	0.0243814	0.18228	0.00545665	0.0214224	0.044315	0.00342574	0.00744171	0.0123371	0.0272783	0.00361645	0.0132701	0.0514645	0.0575799	0.101836	0.00196637	0.00480765	-0.0010471	0.225236	0	0.541006	0.0524727	0.0225408	0.316526
0.10299	1.21709	0.147482	0.110302	0.135418	0.00159	0.0100426	0.000843602	0.309346	0.178477	0.0469862	0.00454583	0.00538945	0.012767	0.0243829	0.18228	0.00545705	0.0214467	0.0443167	0.00349444	0.00745247	0.0123607	0.0272785	0.00363079	0.0132701	0.0514648	0.0575808	0.101836	0.00196637	0.00480765	-0.0010471	0.225236	0	0.528592	0.0503677	0.022059	0.317597
0.100671	1.21715	0.147879	0.110829	0.13406	0.00161168	0.0101764	0.000518334	0.310964	0.178167	0.0478303	0.00474184	0.00538904	0.012767	0.0243865	0.18228	0.00545804	0.0215059	0.0443207	0.00366172	0.00747868	0.0124184	0.027279	0.00366571	0.0132702	0.0514653	0.0575829	0.101837	0.00196637	0.00480765	-0.0010471	0.225236	0	0.5394	0.0504778	0.0225464	0.315545
0.101021	1.21719	0.148138	0.111174	0.133218	0.00162566	0.0102636	0.000316302	0.312032	0.17797	0.0484022	0.00486795	0.00538878	0.012767	0.0243888	0.182281	0.00545867	0.021544	0.0443234	0.00376934	0.00749554	0.0124554	0.0272794	0.00368818	0.0132702	0.0514657	0.0575843	0.101837	0.00196637	0.00480765	-0.0010471	0.225236	0	0.536177	0.0492617	0.0224478	0.315373
0.0988226	1.21726	0.148536	0.111701	0.131877	0.00164725	0.0103973	-4.90317e-06	0.313654	0.177662	0.0492556	0.00506303	0.00538837	0.012767	0.0243925	0.182281	0.00545964	0.0216029	0.0443274	0.00393582	0.00752161	0.0125128	0.0272799	0.00372293	0.0132702	0.0514662	0.0575864	0.101837	0.00196637	0.00480765	-0.0010471	0.225236	0	0.546728	0.0492981	0.0229265	0.31334
0.0988958	1.2173	0.14881	0.112067	0.130989	0.00166205	0.0104898	-0.000218062	0.314788	0.177453	0.0498668	0.00519643	0.00538809	0.012767	0.0243949	0.182281	0.00546031	0.0216432	0.0443302	0.00404966	0.00753945	0.012552	0.0272802	0.00374669	0.0132703	0.0514666	0.0575879	0.101838	0.00196637	0.00480765	-0.0010471	0.225236	0	0.544957	0.048208	0.0228892	0.312939
0.0906574	1.21742	0.149588	0.113096	0.128295	0.00170452	0.0107513	-0.000862928	0.317944	0.176845	0.0515051	0.00558075	0.00538729	0.012767	0.0244021	0.182282	0.00546224	0.0217593	0.0443382	0.00437764	0.00759082	0.012665	0.0272813	0.00381516	0.0132703	0.0514677	0.057592	0.101838	0.00196637	0.00480765	-0.0010471	0.225236	0	0.592998	0.0514449	0.0249473	0.305759
0.101187	1.21737	0.149242	0.112647	0.129646	0.00168525	0.0106357	-0.00054087	0.316586	0.177128	0.0508398	0.00540527	0.00538765	0.012767	0.0243988	0.182282	0.00546136	0.0217063	0.0443346	0.00422789	0.00756736	0.0126134	0.0272808	0.0037839	0.0132703	0.0514672	0.0575901	0.101838	0.00196637	0.00480765	-0.0010471	0.225236	0	0.529974	0.0450714	0.022332	0.313701
0.093324	1.21748	0.149973	0.113613	0.127163	0.00172516	0.0108814	-0.00113593	0.319545	0.176558	0.0523526	0.00576624	0.0053869	0.012767	0.0244055	0.182283	0.00546317	0.0218153	0.0443421	0.00453594	0.00761562	0.0127195	0.0272818	0.00384821	0.0132703	0.0514682	0.0575941	0.101839	0.00196637	0.00480765	-0.0010471	0.225236	0	0.573207	0.0477678	0.024193	0.307186
0.0964629	1.2175	0.150063	0.113735	0.126978	0.00172977	0.0109117	-0.00118143	0.319931	0.176497	0.0525659	0.00580722	0.00538681	0.012767	0.0244063	0.182283	0.00546337	0.0218277	0.044343	0.00457092	0.0076211	0.0127316	0.0272819	0.00385551	0.0132703	0.0514683	0.0575945	0.101839	0.00196637	0.00480765	-0.0010471	0.225236	0	0.553206	0.0451991	0.0233862	0.309273
0.0964461	1.21754	0.150344	0.114111	0.126125	0.00174487	0.0110066	-0.00138698	0.321094	0.176285	0.0531819	0.00594314	0.00538653	0.012767	0.0244088	0.182283	0.00546405	0.0218688	0.0443458	0.00468691	0.00763927	0.0127715	0.0272822	0.00387972	0.0132704	0.0514687	0.057596	0.101839	0.00196637	0.00480765	-0.0010471	0.225236	0	0.552021	0.0444185	0.0233711	0.308784
0.0940706	1.21761	0.150768	0.114677	0.124786	0.00176776	0.0111496	-0.00170886	0.322842	0.175963	0.0541045	0.00614949	0.0053861	0.012767	0.0244126	0.182284	0.00546509	0.0219311	0.0443501	0.00486301	0.00766685	0.0128322	0.0272828	0.00391648	0.0132704	0.0514693	0.0575982	0.101839	0.00196637	0.00480765	-0.0010471	0.225236	0	0.564657	0.0447337	0.023942	0.30639
0.0938177	1.21765	0.151066	0.115078	0.123903	0.0017837	0.0112504	-0.00192163	0.324088	0.175741	0.0547804	0.00629268	0.0053858	0.012767	0.0244153	0.182284	0.0054658	0.0219743	0.0443531	0.00498521	0.00768599	0.0128743	0.0272832	0.00394199	0.0132704	0.0514697	0.0575998	0.10184	0.00196637	0.00480765	-0.0010471	0.225236	0	0.564868	0.0440066	0.0239875	0.305677
0.0898376	1.21774	0.151609	0.115803	0.122196	0.00181293	0.0114334	-0.00233182	0.326332	0.175329	0.0559784	0.00655602	0.00538525	0.012767	0.0244202	0.182285	0.00546712	0.0220539	0.0443586	0.00520995	0.0077212	0.0129517	0.0272839	0.00398891	0.0132705	0.0514704	0.0576026	0.10184	0.00196637	0.00480765	-0.0010471	0.225236	0	0.588523	0.0450251	0.0250307	0.301734
0.0898596	1.21778	0.151893	0.116188	0.121398	0.00182795	0.0115296	-0.00252453	0.327538	0.175122	0.0566533	0.00669071	0.00538497	0.012767	0.0244227	0.182285	0.0054678	0.0220946	0.0443614	0.00532489	0.0077392	0.0129913	0.0272843	0.0040129	0.0132705	0.0514708	0.0576041	0.10184	0.00196637	0.00480765	-0.0010471	0.225236	0	0.587004	0.0440315	0.0250054	0.301219
0.0900075	1.21782	0.15217	0.116564	0.120638	0.00184253	0.0116233	-0.00270798	0.328721	0.174922	0.0573264	0.00682119	0.00538469	0.012767	0.0244251	0.182286	0.00546845	0.022134	0.0443641	0.00543624	0.00775664	0.0130297	0.0272846	0.00403615	0.0132705	0.0514712	0.0576055	0.101841	0.00196637	0.00480765	-0.0010471	0.225236	0	0.584658	0.0429207	0.0249455	0.300801
0.0898831	1.21787	0.152466	0.116968	0.119826	0.00185813	0.0117239	-0.00290401	0.329993	0.174709	0.0580553	0.00696078	0.0053844	0.012767	0.0244277	0.182286	0.00546915	0.0221761	0.044367	0.00555537	0.0077753	0.0130707	0.027285	0.00406101	0.0132705	0.0514716	0.057607	0.101841	0.00196637	0.00480765	-0.0010471	0.225236	0	0.584079	0.0418775	0.0249615	0.300121
0.0848201	1.21797	0.153123	0.117852	0.117838	0.0018932	0.0119457	-0.0033824	0.332744	0.174219	0.0595709	0.00727609	0.00538374	0.012767	0.0244335	0.182287	0.00547073	0.0222714	0.0443736	0.00582446	0.00781746	0.0131634	0.0272858	0.00411719	0.0132706	0.0514724	0.0576105	0.101841	0.00196637	0.00480765	-0.0010471	0.225236	0	0.617498	0.0432475	0.0264323	0.294731
0.0882435	1.21798	0.153161	0.117916	0.117916	0.00189466	0.0119596	-0.00336516	0.332978	0.174208	0.0597776	0.00728763	0.00538372	0.012767	0.0244338	0.182287	0.00547079	0.0222749	0.0443739	0.00583431	0.007819	0.0131668	0.0272859	0.00411924	0.0132706	0.0514725	0.0576106	0.101841	0.00196637	0.00480765	-0.0010471	0.225236	0	0.592553	0.0405907	0.0253888	0.297383
0.08337	1.21808	0.153821	0.118809	0.115972	0.00192974	0.012183	-0.00383308	0.335772	0.173722	0.0613484	0.00760249	0.00538306	0.012767	0.0244396	0.182288	0.00547236	0.02237	0.0443804	0.00610301	0.00786109	0.0132594	0.0272867	0.00417534	0.0132706	0.0514734	0.057614	0.101842	0.00196637	0.00480765	-0.0010471	0.225236	0	0.626132	0.0417338	0.0268541	0.291917
0.0829592	1.21813	0.154149	0.119261	0.115138	0.00194674	0.0122946	-0.00403496	0.337213	0.173493	0.0622178	0.00775401	0.00538274	0.012767	0.0244424	0.182288	0.00547312	0.0224157	0.0443836	0.00623232	0.00788134	0.0133039	0.0272871	0.00420233	0.0132706	0.0514738	0.0576157	0.101842	0.00196637	0.00480765	-0.0010471	0.225236	0	0.627935	0.0408028	0.0269687	0.290818
0.0832378	1.21817	0.154423	0.119643	0.114494	0.00196077	0.0123882	-0.00419122	0.338442	0.173306	0.0629853	0.00787851	0.00538248	0.012767	0.0244447	0.182288	0.00547375	0.0224534	0.0443862	0.00633857	0.00789799	0.0133405	0.0272875	0.00422451	0.0132707	0.0514741	0.057617	0.101843	0.00196637	0.00480765	-0.0010471	0.225236	0	0.624282	0.0396386	0.0268605	0.290449
0.0832257	1.21821	0.154722	0.120061	0.113787	0.00197608	0.0124903	-0.00436281	0.339783	0.173103	0.0638251	0.00801441	0.0053822	0.012767	0.0244473	0.182289	0.00547443	0.0224944	0.044389	0.00645455	0.00791615	0.0133805	0.0272878	0.00424872	0.0132707	0.0514745	0.0576185	0.101843	0.00196637	0.00480765	-0.0010471	0.225236	0	0.622542	0.0387311	0.0268468	0.289787
0.0808566	1.21829	0.15522	0.120745	0.112479	0.00200194	0.0126594	-0.00467861	0.34196	0.172753	0.0651346	0.0082452	0.00538172	0.012767	0.0244515	0.182289	0.00547558	0.0225641	0.0443939	0.0066515	0.00794701	0.0134483	0.0272884	0.00428983	0.0132707	0.0514752	0.057621	0.101843	0.00196637	0.00480765	-0.0010471	0.225236	0	0.638598	0.0390534	0.0276162	0.286601
0.082714	1.21831	0.155365	0.12096	0.112285	0.00200888	0.01271	-0.00472704	0.342681	0.172669	0.0656612	0.0083054	0.00538159	0.012767	0.0244527	0.182289	0.00547588	0.0225823	0.0443951	0.00670288	0.00795505	0.013466	0.0272886	0.00430056	0.0132707	0.0514753	0.0576216	0.101843	0.00196637	0.00480765	-0.0010471	0.225236	0	0.621801	0.037515	0.02698	0.287986
0.0788869	1.2184	0.155999	0.121833	0.110612	0.00204187	0.0129258	-0.00513103	0.345461	0.172222	0.0673393	0.0085997	0.00538098	0.012767	0.0244581	0.18229	0.00547736	0.0226712	0.0444012	0.00695404	0.0079944	0.0135526	0.0272894	0.00435299	0.0132708	0.0514762	0.0576248	0.101844	0.00196637	0.00480765	-0.0010471	0.225236	0	0.64967	0.0385624	0.0282729	0.283069
0.0744578	1.21851	0.156732	0.122844	0.108686	0.00207995	0.0131752	-0.00559618	0.34868	0.171706	0.0692897	0.00893937	0.00538027	0.012767	0.0244644	0.182291	0.00547906	0.0227738	0.0444083	0.00724391	0.0080398	0.0136524	0.0272903	0.0044135	0.0132708	0.0514771	0.0576285	0.101845	0.00196637	0.00480765	-0.0010471	0.225236	0	0.686788	0.0397264	0.0299386	0.276803
0.0756684	1.21854	0.156909	0.123096	0.108344	0.00208873	0.0132358	-0.00567968	0.349503	0.171593	0.0698402	0.0090166	0.0053801	0.012767	0.0244659	0.182291	0.00547945	0.0227971	0.0444099	0.00730982	0.00805013	0.0136751	0.0272905	0.00442726	0.0132708	0.0514773	0.0576294	0.101845	0.00196637	0.00480765	-0.0010471	0.225236	0	0.674311	0.037984	0.0294447	0.277666
0.0747958	1.21859	0.157285	0.123607	0.107303	0.00210852	0.0133632	-0.00593109	0.351114	0.171322	0.0707639	0.00919379	0.00537973	0.012767	0.0244691	0.182292	0.00548033	0.0228506	0.0444136	0.00746104	0.00807381	0.0137272	0.027291	0.00445883	0.0132709	0.0514778	0.0576313	0.101845	0.00196637	0.00480765	-0.0010471	0.225236	0	0.680666	0.0373179	0.029774	0.275991
0.0724115	1.21868	0.157823	0.12434	0.105785	0.00213696	0.0135459	-0.00629699	0.353417	0.170931	0.0720819	0.00944846	0.0053792	0.012767	0.0244739	0.182292	0.00548161	0.0229276	0.044419	0.00767837	0.00810786	0.0138021	0.0272917	0.0045042	0.0132709	0.0514786	0.0576341	0.101846	0.00196637	0.00480765	-0.0010471	0.225236	0	0.701506	0.0374122	0.0307405	0.27225
0.0720688	1.21873	0.15815	0.124786	0.104903	0.00215409	0.0136567	-0.00651013	0.354825	0.170697	0.0728976	0.00960168	0.00537888	0.012767	0.0244767	0.182293	0.00548238	0.0229738	0.0444222	0.00780913	0.00812834	0.0138471	0.0272921	0.00453149	0.0132709	0.051479	0.0576357	0.101846	0.00196637	0.00480765	-0.0010471	0.225236	0	0.70325	0.0364621	0.0308736	0.271217
0.072283	1.21877	0.158416	0.125151	0.104203	0.00216801	0.0137472	-0.00667935	0.35598	0.170508	0.0735732	0.00972597	0.00537862	0.012767	0.024479	0.182293	0.005483	0.0230114	0.0444248	0.0079152	0.00814496	0.0138837	0.0272924	0.00455363	0.013271	0.0514793	0.0576371	0.101846	0.00196637	0.00480765	-0.0010471	0.225236	0	0.699564	0.0352419	0.0307701	0.270949
0.0695669	1.21886	0.159014	0.125965	0.102539	0.00219948	0.0139499	-0.00708084	0.358544	0.170076	0.0750495	0.0100077	0.00537803	0.012767	0.0244843	0.182294	0.00548441	0.0230965	0.0444306	0.00815563	0.00818262	0.0139665	0.0272932	0.00460383	0.013271	0.0514801	0.0576401	0.101847	0.00196637	0.00480765	-0.0010471	0.225236	0	0.72519	0.0354756	0.0319598	0.266503
0.0697975	1.2189	0.159278	0.126328	0.101859	0.00221322	0.0140396	-0.00724533	0.359693	0.16989	0.0757287	0.0101303	0.00537778	0.012767	0.0244865	0.182294	0.00548502	0.0231335	0.0444332	0.00826023	0.008199	0.0140025	0.0272935	0.00462566	0.013271	0.0514805	0.0576415	0.101847	0.00196637	0.00480765	-0.0010471	0.225236	0	0.72109	0.034234	0.0318435	0.266279
0.067608	1.21898	0.159834	0.127087	0.100337	0.00224241	0.0142282	-0.00761291	0.362087	0.16949	0.0771177	0.0103914	0.00537723	0.012767	0.0244914	0.182295	0.00548633	0.0232124	0.0444386	0.00848306	0.00823391	0.0140793	0.0272942	0.00467218	0.0132711	0.0514812	0.0576443	0.101847	0.00196637	0.00480765	-0.0010471	0.225236	0	0.742658	0.0341971	0.0328649	0.262392
0.0653525	1.21907	0.160417	0.127884	0.0987456	0.00227302	0.0144261	-0.00799698	0.364602	0.169072	0.0785809	0.0106651	0.00537666	0.012767	0.0244965	0.182296	0.0054877	0.0232951	0.0444443	0.00871664	0.0082705	0.0141598	0.0272949	0.00472094	0.0132711	0.051482	0.0576473	0.101848	0.00196637	0.00480765	-0.0010471	0.225236	0	0.766406	0.0342082	0.0339897	0.258182
0.0635628	1.21915	0.160956	0.128621	0.0972949	0.00230123	0.014609	-0.00834736	0.366933	0.168687	0.0799445	0.0109172	0.00537613	0.012767	0.0245011	0.182296	0.00548897	0.0233712	0.0444496	0.0089318	0.0083042	0.0142339	0.0272956	0.00476585	0.0132711	0.0514827	0.05765	0.101848	0.00196637	0.00480765	-0.0010471	0.225236	0	0.786013	0.0339867	0.0349381	0.254551
0.0633731	1.2192	0.161276	0.129062	0.0964818	0.00231785	0.014718	-0.00854418	0.368337	0.168463	0.0807847	0.0110654	0.00537582	0.012767	0.0245039	0.182297	0.00548971	0.023416	0.0444527	0.00905826	0.00832401	0.0142775	0.027296	0.00479225	0.0132712	0.0514831	0.0576516	0.101849	0.00196637	0.00480765	-0.0010471	0.225236	0	0.786345	0.032918	0.0350351	0.253659
0.0633161	1.21924	0.161578	0.129479	0.0957271	0.00233349	0.0148209	-0.00872697	0.369666	0.168253	0.0815859	0.0112047	0.00537553	0.012767	0.0245065	0.182297	0.00549041	0.023458	0.0444556	0.00917712	0.00834263	0.0143184	0.0272964	0.00481706	0.0132712	0.0514835	0.0576531	0.101849	0.00196637	0.00480765	-0.0010471	0.225236	0	0.784983	0.0317948	0.03506	0.252999
0.0614645	1.21933	0.162145	0.130257	0.0942251	0.00236309	0.0150135	-0.00908992	0.37213	0.16785	0.0830411	0.011469	0.00537498	0.012767	0.0245114	0.182298	0.00549173	0.0235379	0.0444611	0.00940268	0.00837796	0.0143961	0.0272971	0.00486415	0.0132712	0.0514842	0.057656	0.101849	0.00196637	0.00480765	-0.0010471	0.225236	0	0.806449	0.0315849	0.0361104	0.249067
0.0636224	1.21933	0.162124	0.130236	0.0944002	0.00236163	0.015007	-0.0090487	0.372085	0.167876	0.0830616	0.0114549	0.00537501	0.012767	0.0245111	0.182298	0.00549166	0.0235336	0.0444608	0.0093907	0.00837608	0.014392	0.0272971	0.00486165	0.0132712	0.0514842	0.0576559	0.101849	0.00196637	0.00480765	-0.0010471	0.225236	0	0.776935	0.0294053	0.0348811	0.252417
0.06344	1.21937	0.162445	0.130681	0.0936078	0.00237822	0.0151165	-0.00924067	0.373506	0.167654	0.0839267	0.0116026	0.0053747	0.012767	0.0245139	0.182298	0.0054924	0.0235782	0.0444639	0.00951672	0.00839582	0.0144354	0.0272975	0.00488796	0.0132712	0.0514846	0.0576575	0.10185	0.00196637	0.00480765	-0.0010471	0.225236	0	0.776942	0.0283987	0.0349779	0.251537
0.0609672	1.21947	0.163109	0.131592	0.0918629	0.0024128	0.0153419	-0.00966238	0.376396	0.167185	0.0856433	0.0119112	0.00537405	0.012767	0.0245196	0.182299	0.00549394	0.0236715	0.0444704	0.00978008	0.00843708	0.0145261	0.0272983	0.00494293	0.0132713	0.0514855	0.0576608	0.10185	0.00196637	0.00480765	-0.0010471	0.225236	0	0.806072	0.028437	0.0363939	0.246467
0.0587913	1.21957	0.163755	0.132481	0.0901816	0.00244641	0.0155616	-0.0100689	0.37922	0.166729	0.0873292	0.012211	0.00537343	0.012767	0.0245252	0.1823	0.00549545	0.023762	0.0444766	0.010036	0.00847716	0.0146143	0.0272991	0.00499635	0.0132713	0.0514863	0.0576641	0.101851	0.00196637	0.00480765	-0.0010471	0.225236	0	0.833365	0.0283583	0.0377393	0.241643
0.0567135	1.21967	0.164411	0.133385	0.0884862	0.00248052	0.0157849	-0.0104788	0.382096	0.166268	0.0890537	0.0125153	0.00537279	0.012767	0.0245308	0.1823	0.00549697	0.0238539	0.044483	0.0102956	0.00851783	0.0147037	0.0272999	0.00505055	0.0132714	0.0514872	0.0576674	0.101851	0.00196637	0.00480765	-0.0010471	0.225236	0	0.861185	0.0282497	0.0391214	0.236726
0.0547	1.21977	0.165084	0.134313	0.0867616	0.00251544	0.0160139	-0.010896	0.385049	0.165797	0.0908319	0.0128265	0.00537214	0.012767	0.0245366	0.182301	0.00549853	0.0239479	0.0444895	0.0105612	0.00855944	0.0147952	0.0273008	0.005106	0.0132714	0.0514881	0.0576708	0.101852	0.00196637	0.00480765	-0.0010471	0.225236	0	0.889986	0.0281264	0.040562	0.231647
0.0544018	1.21982	0.165442	0.134812	0.0859208	0.00253375	0.0161361	-0.0111	0.386652	0.165554	0.0918328	0.0129891	0.0053718	0.012767	0.0245396	0.182302	0.00549934	0.023997	0.0444928	0.0107	0.00858117	0.014843	0.0273012	0.00513496	0.0132715	0.0514885	0.0576725	0.101852	0.00196637	0.00480765	-0.0010471	0.225236	0	0.891858	0.0271385	0.0407861	0.230422
0.0522248	1.21993	0.166185	0.135838	0.0840328	0.00257225	0.016389	-0.0115568	0.389923	0.165035	0.0938127	0.013332	0.00537108	0.012767	0.024546	0.182303	0.00550106	0.0241006	0.0445	0.0109926	0.00862702	0.0149439	0.0273021	0.00519606	0.0132715	0.0514895	0.0576762	0.101853	0.00196637	0.00480765	-0.0010471	0.225236	0	0.925805	0.0271099	0.0424894	0.224563
0.0544198	1.21991	0.16604	0.135652	0.0845823	0.00256415	0.0163408	-0.0114254	0.389365	0.165154	0.0935618	0.0132583	0.00537124	0.012767	0.0245446	0.182302	0.00550069	0.0240784	0.0444985	0.0109297	0.00861716	0.0149222	0.0273019	0.00518292	0.0132715	0.0514893	0.0576754	0.101853	0.00196637	0.00480765	-0.0010471	0.225236	0	0.885261	0.0249324	0.0407798	0.229425
0.0525534	1.22001	0.166719	0.136593	0.0828918	0.00259923	0.0165723	-0.0118347	0.392374	0.164683	0.0954033	0.0135705	0.00537058	0.012767	0.0245504	0.182303	0.00550225	0.0241727	0.044505	0.0111961	0.00865889	0.0150139	0.0273028	0.00523854	0.0132716	0.0514902	0.0576788	0.101853	0.00196637	0.00480765	-0.0010471	0.225236	0	0.913275	0.0247262	0.0422335	0.224381
0.0524401	1.22006	0.167046	0.137053	0.0821698	0.00261579	0.0166842	-0.0120103	0.393863	0.164466	0.0963597	0.013717	0.00537028	0.012767	0.0245531	0.182304	0.00550299	0.0242169	0.044508	0.0113212	0.00867848	0.015057	0.0273032	0.00526465	0.0132716	0.0514906	0.0576804	0.101854	0.00196637	0.00480765	-0.0010471	0.225236	0	0.9117	0.0237175	0.0423315	0.223595
0.0523553	1.22011	0.167368	0.137506	0.0814692	0.00263205	0.0167944	-0.0121807	0.395333	0.164253	0.0973104	0.0138608	0.00536998	0.012767	0.0245558	0.182304	0.00550371	0.0242604	0.044511	0.0114439	0.00869771	0.0150993	0.0273035	0.00529026	0.0132716	0.051491	0.057682	0.101854	0.00196637	0.00480765	-0.0010471	0.225236	0	0.909505	0.0227249	0.0424081	0.222885
0.052464	1.22015	0.167649	0.137905	0.0808831	0.00264618	0.016891	-0.0123235	0.396632	0.16407	0.0981652	0.0139855	0.00536972	0.012767	0.0245581	0.182304	0.00550433	0.024298	0.0445136	0.0115504	0.00871438	0.015136	0.0273039	0.00531248	0.0132716	0.0514913	0.0576833	0.101854	0.00196637	0.00480765	-0.0010471	0.225236	0	0.903831	0.0216823	0.0423294	0.222666
0.0565695	1.22007	0.16715	0.137232	0.0823737	0.00261955	0.0167222	-0.0119647	0.394534	0.16444	0.0970059	0.0137463	0.00537022	0.012767	0.0245536	0.182304	0.00550314	0.0242258	0.0445086	0.0113462	0.00868239	0.0150656	0.0273032	0.00526986	0.0132716	0.0514907	0.0576807	0.101854	0.00196637	0.00480765	-0.0010471	0.225236	0	0.8346	0.0192173	0.0392669	0.2317
0.054202	1.22018	0.167905	0.138281	0.0805414	0.00265831	0.0169795	-0.0124086	0.397899	0.163923	0.0990947	0.0140909	0.0053695	0.012767	0.02456	0.182305	0.00550486	0.0243298	0.0445158	0.0116402	0.00872846	0.0151669	0.0273042	0.00533124	0.0132716	0.0514916	0.0576845	0.101854	0.00196637	0.00480765	-0.0010471	0.225236	0	0.867097	0.0191591	0.0409918	0.225898
0.0537936	1.22024	0.168292	0.138828	0.0796907	0.00267791	0.0171123	-0.0126155	0.399671	0.163666	0.100244	0.0142642	0.00536913	0.012767	0.0245633	0.182305	0.00550573	0.0243822	0.0445195	0.0117882	0.00875163	0.0152179	0.0273046	0.00536213	0.0132717	0.0514921	0.0576864	0.101855	0.00196637	0.00480765	-0.0010471	0.225236	0	0.869485	0.0184329	0.0413108	0.224467
0.057803	1.22017	0.167846	0.138227	0.0810219	0.00265412	0.0169616	-0.012295	0.397799	0.163997	0.0992131	0.0140504	0.00536958	0.012767	0.0245593	0.182304	0.00550466	0.0243176	0.044515	0.0116057	0.00872305	0.015155	0.027304	0.00532404	0.0132716	0.0514915	0.057684	0.101854	0.00196637	0.00480765	-0.0010471	0.225236	0	-9.35578	-0.324136	-0.427287	1.39275
0.0527544	1.22036	0.169121	0.139997	0.0778806	0.00271976	0.0173962	-0.0130556	0.403466	0.163119	0.102712	0.0146343	0.00536836	0.012767	0.0245701	0.182306	0.00550758	0.024494	0.0445272	0.012104	0.0088011	0.0153267	0.0273056	0.00542805	0.0132717	0.0514932	0.0576904	0.101855	0.00196637	0.00480765	-0.0010471	0.225236	0	0	0	0	0.321113
0.0523963	1.22041	0.169505	0.140541	0.0770679	0.00273908	0.0175281	-0.0132534	0.405241	0.162868	0.103882	0.0148048	0.005368	0.012767	0.0245733	0.182306	0.00550844	0.0245455	0.0445307	0.0122495	0.00882389	0.0153768	0.0273061	0.00545843	0.0132717	0.0514936	0.0576922	0.101856	0.00196637	0.00480765	-0.0010471	0.225236	0	0	0	0	0.319897
0.0522901	1.22046	0.169838	0.141015	0.0763987	0.00275564	0.0176423	-0.0134167	0.406792	0.162654	0.104923	0.0149507	0.0053677	0.012767	0.024576	0.182307	0.00550917	0.0245896	0.0445338	0.012374	0.0088434	0.0154197	0.0273065	0.00548443	0.0132718	0.0514941	0.0576938	0.101856	0.00196637	0.00480765	-0.0010471	0.225236	0	0	0	0	0.318815
0.0522227	1.22051	0.170162	0.141479	0.0757563	0.00277179	0.017754	-0.0135734	0.408314	0.162447	0.105953	0.0150928	0.0053674	0.012767	0.0245786	0.182307	0.00550988	0.0246325	0.0445367	0.0124953	0.0088624	0.0154615	0.0273069	0.00550975	0.0132718	0.0514945	0.0576954	0.101856	0.00196637	0.00480765	-0.0010471	0.225236	0	0	0	0	0.317745
0.0523473	1.22055	0.170447	0.141887	0.0752241	0.00278581	0.0178519	-0.0137035	0.409662	0.162269	0.106882	0.0152159	0.00536715	0.012767	0.0245809	0.182307	0.0055105	0.0246697	0.0445393	0.0126004	0.00887885	0.0154977	0.0273072	0.00553167	0.0132718	0.0514948	0.0576967	0.101856	0.00196637	0.00480765	-0.0010471	0.225236	0	0	0	0	0.316779
0.0500854	1.22066	0.171267	0.143039	0.0733547	0.00282748	0.0181324	-0.0141573	0.413385	0.16172	0.109271	0.015585	0.00536637	0.012767	0.0245878	0.182308	0.00551234	0.0247812	0.044547	0.0129154	0.0089282	0.0156062	0.0273082	0.00559743	0.0132719	0.0514958	0.0577007	0.101857	0.00196637	0.00480765	-0.0010471	0.225236	0	0	0	0	0.314316
0.052093	1.22064	0.171126	0.14286	0.073903	0.00281949	0.0180857	-0.0140261	0.412861	0.161838	0.109065	0.015512	0.00536653	0.012767	0.0245864	0.182308	0.00551198	0.0247591	0.0445455	0.0128531	0.00891844	0.0155848	0.027308	0.00558443	0.0132719	0.0514956	0.0576999	0.101857	0.00196637	0.00480765	-0.0010471	0.225236	0	0	0	0	0.314516
0.0544729	1.22061	0.170944	0.142624	0.0745462	0.00280938	0.0180248	-0.0138718	0.41215	0.161984	0.10874	0.0154203	0.00536672	0.012767	0.0245847	0.182308	0.00551152	0.0247314	0.0445436	0.0127748	0.00890618	0.0155578	0.0273077	0.00556808	0.0132718	0.0514954	0.0576989	0.101857	0.00196637	0.00480765	-0.0010471	0.225236	0	0	0	0	0.314839
0.0542759	1.22066	0.171297	0.14313	0.0738653	0.00282685	0.0181463	-0.0140381	0.413817	0.161761	0.109883	0.0155738	0.0053664	0.012767	0.0245876	0.182308	0.00551229	0.0247778	0.0445468	0.0129058	0.00892669	0.0156029	0.0273081	0.00559543	0.0132719	0.0514958	0.0577006	0.101857	0.00196637	0.00480765	-0.0010471	0.225236	0	0	0	0	0.313656
0.0538859	1.22072	0.17169	0.143693	0.0730946	0.00284635	0.0182816	-0.0142261	0.415669	0.161512	0.111147	0.0157453	0.00536604	0.012767	0.0245908	0.182309	0.00551315	0.0248296	0.0445504	0.0130522	0.00894963	0.0156533	0.0273086	0.00562599	0.0132719	0.0514963	0.0577025	0.101857	0.00196637	0.00480765	-0.0010471	0.225236	0	0	0	0	0.312348
0.0522378	1.22081	0.172353	0.144633	0.0716812	0.00287965	0.0185091	-0.0145699	0.418732	0.161079	0.113174	0.0160393	0.00536542	0.012767	0.0245962	0.18231	0.00551462	0.0249184	0.0445565	0.0133031	0.00898893	0.0157398	0.0273094	0.00567837	0.0132719	0.0514971	0.0577057	0.101858	0.00196637	0.00480765	-0.0010471	0.225236	0	0	0	0	0.310259
0.0524877	1.22085	0.172616	0.145016	0.0712507	0.00289235	0.0185999	-0.0146757	0.420012	0.160921	0.114098	0.0161501	0.00536519	0.012767	0.0245983	0.18231	0.00551517	0.0249519	0.0445588	0.0133976	0.00900373	0.0157723	0.0273097	0.0056981	0.013272	0.0514974	0.0577069	0.101858	0.00196637	0.00480765	-0.0010471	0.225236	0	0	0	0	0.309302
0.0503092	1.22096	0.173424	0.146162	0.0695217	0.00293299	0.0188774	-0.0150963	0.423749	0.160392	0.116571	0.016509	0.00536444	0.012767	0.0246049	0.182311	0.00551697	0.0250603	0.0445663	0.0137039	0.00905171	0.0158779	0.0273107	0.00576203	0.013272	0.0514984	0.0577108	0.101859	0.00196637	0.00480765	-0.0010471	0.225236	0	0	0	0	0.30676
0.0529375	1.22092	0.173154	0.145804	0.0703739	0.00291837	0.0187865	-0.0148913	0.422648	0.160599	0.116007	0.0163771	0.00536472	0.012767	0.0246025	0.18231	0.00551631	0.0250204	0.0445636	0.0135913	0.00903408	0.0158391	0.0273103	0.00573854	0.013272	0.0514981	0.0577093	0.101859	0.00196637	0.00480765	-0.0010471	0.225236	0	0	0	0	0.307328
0.0587851	1.2208	0.17235	0.144696	0.0724697	0.0028765	0.0185128	-0.0143846	0.419129	0.161166	0.113903	0.0160036	0.0053655	0.012767	0.0245955	0.18231	0.00551444	0.0249076	0.0445558	0.0132725	0.00898415	0.0157293	0.0273093	0.00567199	0.0132719	0.051497	0.0577053	0.101858	0.00196637	0.00480765	-0.0010471	0.225236	0	0	0	0	0.309476
0.0543834	1.22097	0.173492	0.146313	0.0699905	0.00293403	0.0189045	-0.0149873	0.42439	0.160415	0.117366	0.0165119	0.00536444	0.012767	0.024605	0.182311	0.00551699	0.0250611	0.0445664	0.0137064	0.0090521	0.0158787	0.0273107	0.00576256	0.013272	0.0514984	0.0577108	0.101859	0.00196637	0.00480765	-0.0010471	0.225236	0	0	0	0	0.305918
0.0565985	1.22095	0.17338	0.146174	0.070452	0.00292755	0.0188676	-0.0148768	0.423993	0.160513	0.117239	0.0164524	0.00536456	0.012767	0.0246039	0.182311	0.00551669	0.0250432	0.0445651	0.0136556	0.00904415	0.0158612	0.0273105	0.00575196	0.013272	0.0514983	0.0577101	0.101859	0.00196637	0.00480765	-0.0010471	0.225236	0	0	0	0	0.306039
0.0543518	1.22105	0.17414	0.147257	0.0689058	0.00296538	0.0191286	-0.0152535	0.427544	0.160025	0.119641	0.0167857	0.00536386	0.012767	0.0246101	0.182312	0.00551836	0.0251438	0.0445721	0.01394	0.0090887	0.0159592	0.0273114	0.00581133	0.0132721	0.0514992	0.0577138	0.101859	0.00196637	0.00480765	-0.0010471	0.225236	0	0	0	0	0.303573
0.053511	2.09813	0.15272	-1.23116	0.705553	0.0697914	0.0885083	0.475669	0.750637	-1.46197	-0.311904	0.0169994	0.00536342	0.012767	0.024614	0.182312	0.00551943	0.0252084	0.0445765	0.0141224	0.00911727	0.016022	0.027312	0.0058494	0.0132721	0.0514998	0.0577161	0.10186	0.00196637	0.00480765	-0.0010471	0.225236	0	0	0	0	0.453536
0.0527865	1.24464	0.199697	0.0189884	0.0908306	0.00714297	0.0268053	0.00183398	0.464406	0.00780171	0.0725521	0.0172043	0.00536299	0.012767	0.0246178	0.182313	0.00552045	0.0252703	0.0445808	0.0142973	0.00914466	0.0160823	0.0273125	0.00588591	0.0132721	0.0515004	0.0577183	0.10186	0.00196637	0.00480765	-0.0010471	0.225236	0	0	0	0	0.38778
0.050053	1.2449	0.203462	0.00966027	0.0890117	0.00740742	0.0276822	0.00149738	0.471568	-0.00439069	0.0714404	0.01762	0.00536212	0.012767	0.0246256	0.182314	0.00552254	0.0253958	0.0445895	0.014652	0.00920023	0.0162045	0.0273136	0.00595996	0.0132722	0.0515016	0.0577228	0.101861	0.00196637	0.00480765	-0.0010471	0.225236	0	0	0	0	0.391437
0.0503492	1.24485	0.205087	0.00486476	0.088322	0.00749433	0.027994	0.0012386	0.474129	-0.00973549	0.070546	0.0177236	0.0053619	0.012767	0.0246275	0.182314	0.00552306	0.0254271	0.0445916	0.0147404	0.00921408	0.0162349	0.0273139	0.00597841	0.0132722	0.0515019	0.0577239	0.101861	0.00196637	0.00480765	-0.0010471	0.225236	0	0	0	0	0.393091
0.0501296	1.24466	0.207174	-0.000883481	0.0873988	0.00761272	0.028411	0.000931765	0.477514	-0.0164991	0.0695312	0.0178826	0.00536157	0.012767	0.0246304	0.182314	0.00552385	0.0254752	0.044595	0.0148761	0.00923533	0.0162817	0.0273144	0.00600674	0.0132722	0.0515023	0.0577257	0.101861	0.00196637	0.00480765	-0.0010471	0.225236	0	0	0	0	0.394919
0.047536	1.24439	0.211403	-0.01135	0.0853884	0.00788987	0.0293473	0.000462625	0.485077	-0.0300495	0.0680583	0.0183128	0.00536067	0.012767	0.0246384	0.182316	0.00552601	0.0256051	0.0446039	0.0152432	0.00929284	0.0164082	0.0273155	0.00608338	0.0132723	0.0515035	0.0577303	0.101862	0.00196637	0.00480765	-0.0010471	0.225236	0	0	0	0	0.39687
0.0543472	1.24367	0.207889	-0.00450376	0.0873233	0.00757321	0.028358	0.000484248	0.477013	-0.0188401	0.0680485	0.0177341	0.00536188	0.012767	0.0246277	0.182314	0.00552311	0.0254303	0.0445919	0.0147494	0.00921549	0.016238	0.027314	0.00598029	0.0132722	0.0515019	0.0577241	0.101861	0.00196637	0.00480765	-0.0010471	0.225236	0	0	0	0	0.397147
0.0480033	1.24305	0.215185	-0.0218403	0.083783	0.00806657	0.0300107	-0.000265874	0.490309	-0.0420675	0.0657789	0.0185282	0.00536022	0.012767	0.0246424	0.182316	0.00552709	0.0256702	0.0446084	0.0154271	0.00932164	0.0164715	0.0273161	0.00612176	0.0132723	0.0515041	0.0577327	0.101863	0.00196637	0.00480765	-0.0010471	0.225236	0	0	0	0	0.400059
0.0523371	1.24215	0.213543	-0.0189176	0.0847525	0.00789049	0.0294797	-0.000380005	0.485908	-0.0367282	0.0654179	0.0181964	0.00536091	0.012767	0.0246363	0.182315	0.00552542	0.02557	0.0446015	0.0151439	0.00927728	0.0163739	0.0273152	0.00606264	0.0132723	0.0515032	0.0577291	0.101862	0.00196637	0.00480765	-0.0010471	0.225236	0	0	0	0	0.40077
0.0519538	1.2411	0.21603	-0.0253011	0.08365	0.00801483	0.0299359	-0.000829169	0.489461	-0.0445048	0.0640821	0.01837	0.00536055	0.012767	0.0246395	0.182316	0.00552629	0.0256224	0.0446051	0.0152921	0.00930049	0.016425	0.0273157	0.00609357	0.0132723	0.0515037	0.057731	0.101862	0.00196637	0.00480765	-0.0010471	0.225236	0	0	0	0	0.402607
0.0478985	1.23964	0.222068	-0.0398419	0.0807994	0.00838336	0.0312065	-0.0016289	0.499537	-0.0635151	0.0617261	0.0189468	0.00535935	0.012767	0.0246502	0.182317	0.00552918	0.0257966	0.0446172	0.0157843	0.0093776	0.0165946	0.0273172	0.00619634	0.0132724	0.0515053	0.0577372	0.101863	0.00196637	0.00480765	-0.0010471	0.225236	0	0	0	0	0.405636
0.0500423	1.23829	0.222318	-0.040962	0.0808174	0.00833748	0.0311098	-0.00193395	0.498564	-0.0640547	0.0608639	0.01884	0.00535957	0.012767	0.0246482	0.182317	0.00552865	0.0257644	0.0446149	0.0156932	0.00936332	0.0165632	0.0273169	0.0061773	0.0132724	0.051505	0.0577361	0.101863	0.00196637	0.00480765	-0.0010471	0.225236	0	0	0	0	0.406974
0.0458374	1.2361	0.229212	-0.0574608	0.0775835	0.00874214	0.0325212	-0.00292181	0.509663	-0.0856077	0.0580059	0.0194719	0.00535825	0.012767	0.0246599	0.182319	0.00553181	0.0259552	0.0446281	0.0162325	0.0094478	0.016749	0.0273186	0.00628989	0.0132725	0.0515068	0.0577429	0.101864	0.00196637	0.00480765	-0.0010471	0.225236	0	0	0	0	0.410614
0.0477188	1.23439	0.229629	-0.058809	0.0775224	0.0086998	0.0324434	-0.00328214	0.50878	-0.0865648	0.0570264	0.0193744	0.00535845	0.012767	0.0246581	0.182318	0.00553132	0.0259258	0.0446261	0.0161492	0.00943476	0.0167203	0.0273184	0.00627251	0.0132725	0.0515065	0.0577419	0.101864	0.00196637	0.00480765	-0.0010471	0.225236	0	0	0	0	0.412125
0.0480005	1.23227	0.231905	-0.0644103	0.0765562	0.00877887	0.0327763	-0.00385524	0.511154	-0.0933499	0.055443	0.0194765	0.00535824	0.012767	0.02466	0.182319	0.00553184	0.0259566	0.0446282	0.0162364	0.00944841	0.0167503	0.0273186	0.0062907	0.0132725	0.0515068	0.057743	0.101864	0.00196637	0.00480765	-0.0010471	0.225236	0	0	0	0	0.414338
0.0523693	1.23087	0.229975	-0.0600584	0.0776143	0.0085852	0.0321848	-0.00394167	0.506151	-0.0868407	0.0552954	0.0191412	0.00535894	0.012767	0.0246538	0.182318	0.00553016	0.0258553	0.0446212	0.0159502	0.00940359	0.0166517	0.0273177	0.00623097	0.0132724	0.0515058	0.0577393	0.101864	0.00196637	0.00480765	-0.0010471	0.225236	0	0	0	0	0.414896
0.0496158	1.22776	0.235446	-0.0729948	0.0751133	0.00886108	0.0331945	-0.004935	0.513841	-0.10357	0.0525347	0.0195637	0.00535806	0.012767	0.0246616	0.182319	0.00553227	0.025983	0.04463	0.0163108	0.00946006	0.0167759	0.0273189	0.00630623	0.0132725	0.051507	0.0577439	0.101865	0.00196637	0.00480765	-0.0010471	0.225236	0	0	0	0	0.418501
0.0523358	1.22584	0.235289	-0.0726375	0.0753084	0.00878025	0.0329875	-0.00523946	0.511863	-0.102579	0.0517848	0.0194154	0.00535837	0.012767	0.0246589	0.182318	0.00553153	0.0259382	0.044627	0.0161842	0.00944024	0.0167323	0.0273185	0.00627981	0.0132725	0.0515066	0.0577423	0.101864	0.00196637	0.00480765	-0.0010471	0.225236	0	0	0	0	0.419775
0.0502772	1.22229	0.240252	-0.0842261	0.0730668	0.00900865	0.0338502	-0.00624259	0.518288	-0.117549	0.0490525	0.0197627	0.00535764	0.012767	0.0246653	0.182319	0.00553327	0.0260431	0.0446342	0.0164806	0.00948667	0.0168344	0.0273194	0.00634169	0.0132725	0.0515076	0.0577461	0.101865	0.00196637	0.00480765	-0.0010471	0.225236	0	0	0	0	0.423366
0.0501458	1.21908	0.24327	-0.0911607	0.0717559	0.00911247	0.0342891	-0.00701401	0.52133	-0.126361	0.0470092	0.0199123	0.00535733	0.012767	0.0246681	0.18232	0.00553402	0.0260882	0.0446373	0.0166082	0.00950666	0.0168784	0.0273198	0.00636833	0.0132725	0.051508	0.0577477	0.101865	0.00196637	0.00480765	-0.0010471	0.225236	0	0	0	0	0.426158
0.0521752	1.2166	0.243896	-0.0924114	0.0715727	0.00907392	0.0342335	-0.00745126	0.52048	-0.127697	0.0459294	0.0198376	0.00535748	0.012767	0.0246667	0.182319	0.00553364	0.0260657	0.0446358	0.0165445	0.00949668	0.0168565	0.0273196	0.00635503	0.0132725	0.0515078	0.0577469	0.101865	0.00196637	0.00480765	-0.0010471	0.225236	0	0	0	0	0.42784
0.0523439	1.21317	0.24666	-0.0985961	0.070382	0.00915622	0.0346045	-0.00821917	0.52293	-0.135621	0.0439348	0.0199563	0.00535724	0.012767	0.0246689	0.18232	0.00553424	0.0261015	0.0446382	0.0166458	0.00951255	0.0168914	0.0273199	0.00637617	0.0132725	0.0515081	0.0577482	0.101865	0.00196637	0.00480765	-0.0010471	0.225236	0	0	0	0	0.430587
0.0523498	1.20944	0.249673	-0.105278	0.0690774	0.00924783	0.0350134	-0.00904817	0.525637	-0.14425	0.0417908	0.0200911	0.00535695	0.012767	0.0246714	0.18232	0.00553491	0.0261423	0.0446411	0.0167609	0.00953057	0.016931	0.0273203	0.0064002	0.0132726	0.0515085	0.0577497	0.101866	0.00196637	0.00480765	-0.0010471	0.225236	0	0	0	0	0.433511
0.0544315	1.20668	0.250419	-0.106604	0.0688296	0.00921328	0.034975	-0.00951932	0.524872	-0.145863	0.0406561	0.0200287	0.00535708	0.012767	0.0246703	0.18232	0.0055346	0.0261234	0.0446398	0.0167076	0.00952223	0.0169126	0.0273201	0.00638907	0.0132726	0.0515083	0.057749	0.101865	0.00196637	0.00480765	-0.0010471	0.225236	0	0	0	0	0.435265
0.0543044	1.20251	0.253666	-0.113674	0.0674174	0.00931066	0.0354125	-0.0104208	0.527735	-0.155106	0.0383479	0.0201758	0.00535678	0.012767	0.024673	0.18232	0.00553534	0.0261678	0.0446428	0.0168331	0.00954189	0.0169559	0.0273205	0.00641527	0.0132726	0.0515088	0.0577506	0.101866	0.00196637	0.00480765	-0.0010471	0.225236	0	0	0	0	0.438383
0.0497914	1.19484	0.262476	-0.133494	0.0634385	0.00968733	0.0368737	-0.0123434	0.538321	-0.181205	0.0332748	0.0207633	0.00535555	0.012767	0.0246839	0.182322	0.00553828	0.0263453	0.0446551	0.0173345	0.00962043	0.0171286	0.0273221	0.00651994	0.0132727	0.0515104	0.057757	0.101867	0.00196637	0.00480765	-0.0010471	0.225236	0	0	0	0	0.444658
0.0544927	1.19376	0.259883	-0.126912	0.0647287	0.00947686	0.0362006	-0.0122433	0.532679	-0.172551	0.0337406	0.0204294	0.00535625	0.012767	0.0246777	0.182321	0.00553661	0.0262445	0.0446481	0.0170496	0.00957579	0.0170304	0.0273212	0.00646046	0.0132726	0.0515095	0.0577533	0.101866	0.00196637	0.00480765	-0.0010471	0.225236	0	0	0	0	0.444601
0.0541436	1.18867	0.263625	-0.134855	0.0630959	0.00958438	0.0366934	-0.0133065	0.535831	-0.183096	0.0310558	0.0205969	0.0053559	0.012767	0.0246808	0.182321	0.00553745	0.026295	0.0446516	0.0171925	0.00959818	0.0170797	0.0273216	0.00649029	0.0132726	0.0515099	0.0577552	0.101866	0.00196637	0.00480765	-0.0010471	0.225236	0	0	0	0	0.448141
0.0543193	1.18375	0.266817	-0.141445	0.0617182	0.00966019	0.0370748	-0.0142886	0.538105	-0.191911	0.0286107	0.0207161	0.00535565	0.012767	0.024683	0.182322	0.00553804	0.0263311	0.0446541	0.0172943	0.00961412	0.0171147	0.027322	0.00651154	0.0132727	0.0515103	0.0577565	0.101867	0.00196637	0.00480765	-0.0010471	0.225236	0	0	0	0	0.4514

## Sheet: Xyl_A-stat
Table S2_Xyl_A-stat. Production of metabolites per carbohydrate consumed (mol/mol-carbs) and biomass yield (gDW/g-(fiber+mucin)) during A-stat experiment in xylan plus mucin medium. Metabolite abbreviations in the tab 'metabolite abbreviations'. Negative value indicate consumption of metabolite.
D	ace	but	etOH	for	isobut	isoval	lact	prop	suc	valer	ala	arg	asp	asn	cys	gln	glu	gly	his	ile	leu	lys	met	phe	pro	ser	thr	trp	tyr	val	muc	CH4	CO2	H2	H2S	Yxs
0.0581753	0.657531	0.143302	0.394952	-0.00659974	0.00303117	0.0239055	0.000434169	0.384	0.26867	0.0525606	0.0205456	0.00456874	0.0101211	0.0196878	0.00683228	0.00435683	0.0200826	0.0353796	0.0074056	0.019054	0.0384651	0.0216646	0.00533434	0.0105995	0.0411911	0.0457905	0.0807719	0.00155885	0.00388253	0.0259723	0.178557	0	0.418358	0.0085385	0.0212359	0.233668
0.0586505	0.66071	0.143601	0.355819	0.00332745	0.00272654	0.0219009	-0.000329377	0.369295	0.262175	0.0518815	0.0205456	0.00456874	0.0101211	0.0196878	0.00683228	0.00435683	0.0200826	0.0353796	0.0074056	0.019054	0.0384651	0.0216646	0.00533434	0.0105995	0.0411911	0.0457905	0.0807719	0.00155885	0.00388253	0.0259723	0.178557	0	0.417046	0.00850195	0.0211981	0.254419
0.0582231	0.663563	0.143932	0.324233	0.0123387	0.00242653	0.0201309	-0.00100435	0.35601	0.258091	0.0512986	0.0205456	0.00456874	0.0101211	0.0196878	0.00683228	0.00435683	0.0200826	0.0353796	0.0074056	0.019054	0.0384651	0.0216646	0.00533434	0.0105995	0.0411911	0.0457905	0.0807719	0.00155885	0.00388253	0.0259723	0.178557	0	0.421634	0.00859349	0.0214607	0.270175
0.0572021	0.666156	0.144261	0.297728	0.0206566	0.00213275	0.0185303	-0.00160595	0.343721	0.255643	0.0507802	0.0205456	0.00456874	0.0101211	0.0196878	0.00683228	0.00435683	0.0200826	0.0353796	0.0074056	0.019054	0.0384651	0.0216646	0.00533434	0.0105995	0.0411911	0.0457905	0.0807719	0.00155885	0.00388253	0.0259723	0.178557	0	0.430129	0.00877316	0.0219234	0.282726
0.0556772	0.668521	0.144577	0.275509	0.0283929	0.00184341	0.017072	-0.00214002	0.332226	0.254643	0.0503142	0.0205456	0.00456874	0.0101211	0.0196878	0.00683228	0.00435683	0.0200826	0.0353796	0.0074056	0.019054	0.0384651	0.0216646	0.00533434	0.0105995	0.0411911	0.0457905	0.0807719	0.00155885	0.00388253	0.0259723	0.178557	0	0.442297	0.00903742	0.0225752	0.292517
0.058377	0.669771	0.14429	0.246439	0.0327411	0.00176662	0.0160403	-0.00239741	0.324632	0.247755	0.0498737	0.0205456	0.00456874	0.0101211	0.0196878	0.00683228	0.00435683	0.0200826	0.0353796	0.0074056	0.019054	0.0384651	0.0216646	0.00533434	0.0105995	0.0411911	0.0457905	0.0807719	0.00155885	0.00388253	0.0259723	0.178557	0	0.42165	0.00864037	0.0215518	0.310053
0.0578497	1.3087	0.215935	2.11303	0.225069	-0.00133198	0.0160644	-0.000408388	1.6349	0.83126	0.106078	-0.221647	-0.00529281	0.0101211	0.0172679	0.00500248	0.00435683	0.0137084	0.0352988	0.0074056	-0.401238	-0.790986	0.0216646	0.00533434	0.00600599	0.0357929	0.0441111	0.0807719	0.00155885	0.00388253	-0.656295	0.178557	0	0.425118	0.00874672	0.0217597	-2.81503
0.0576783	0.675321	0.131494	0.0875129	0.0232978	0.00222357	0.0135054	0	0.27442	0.220898	0.0476388	0.011033	0.0042798	0.0101211	0.0196289	0.00677207	0.00435683	0.0198	0.035372	0.0074056	0.00642735	0.0126318	0.0216646	0.00533434	0.0104941	0.0410284	0.045736	0.0807719	0.00155885	0.00388253	0.00536305	0.178557	0	0.426069	0.00881248	0.0218387	0.360317
0.0596732	0.675331	0.131718	0.0883898	0.0233009	0.00223286	0.0135417	0	0.275565	0.220822	0.0476572	0.0110451	0.00427985	0.0101211	0.0196288	0.00677211	0.00435683	0.0198005	0.035372	0.0074056	0.00643097	0.012643	0.0216646	0.00533434	0.010494	0.0410284	0.045736	0.0807719	0.00155885	0.00388253	0.00536943	0.178557	0	0.411588	0.00856853	0.0211255	0.361507
0.0579753	0.675199	0.131567	0.0840711	0.0244292	0.00213498	0.0132329	0	0.269626	0.223126	0.0474621	0.0108949	0.0042792	0.0101211	0.0196293	0.00677163	0.00435683	0.0197947	0.0353717	0.0074056	0.0063859	0.0125033	0.0216646	0.00533434	0.0104953	0.0410278	0.0457356	0.0807719	0.00155885	0.00388253	0.00529003	0.178557	0	0.423465	0.00888471	0.0217647	0.362528
0.0617862	0.675275	0.132195	0.0877179	0.0241266	0.00219425	0.0134367	0	0.274515	0.222129	0.0475798	0.0109804	0.00427957	0.0101211	0.019629	0.0067719	0.00435683	0.019798	0.0353719	0.0074056	0.00641155	0.0125828	0.0216646	0.00533434	0.0104945	0.0410282	0.0457358	0.0807719	0.00155885	0.00388253	0.00533522	0.178557	0	0.397247	0.0084107	0.0204447	0.363159
0.0616397	0.675203	0.132453	0.0860559	0.0249922	0.00214326	0.0132859	0	0.272162	0.223591	0.0474779	0.0108987	0.00427922	0.0101211	0.0196293	0.00677164	0.00435683	0.0197949	0.0353717	0.0074056	0.00638706	0.0125069	0.0216646	0.00533434	0.0104952	0.0410278	0.0457356	0.0807719	0.00155885	0.00388253	0.00529207	0.178557	0	0.398156	0.00782155	0.0205187	0.363566
0.0631333	0.675188	0.132977	0.0866507	0.025518	0.00213531	0.0132769	0	0.27287	0.224193	0.0474617	0.0108811	0.00427914	0.0101211	0.0196294	0.00677158	0.00435683	0.0197942	0.0353717	0.0074056	0.00638177	0.0124905	0.0216646	0.00533434	0.0104954	0.0410278	0.0457356	0.0807719	0.00155885	0.00388253	0.00528276	0.178557	0	0.388796	0.00798136	0.0200626	0.363719
0.0655292	0.675199	0.133648	0.088328	0.0259106	0.0021474	0.0133346	0	0.275044	0.224414	0.0474853	0.0108931	0.0042792	0.0101211	0.0196293	0.00677162	0.00435683	0.0197947	0.0353717	0.0074056	0.00638537	0.0125016	0.0216646	0.00533434	0.0104953	0.0410278	0.0457356	0.0807719	0.00155885	0.00388253	0.0052891	0.178557	0	0.375514	0.00768887	0.0193964	0.363576
0.0650757	0.675118	0.134203	0.0869289	0.0271145	0.00209167	0.0131775	0	0.273002	0.226234	0.0473737	0.0108012	0.0042788	0.0101211	0.0196296	0.00677132	0.00435683	0.0197911	0.0353715	0.0074056	0.00635778	0.0124161	0.0216646	0.00533434	0.0104961	0.0410274	0.0457353	0.0807719	0.00155885	0.00388253	0.0052405	0.178557	0	0.378389	0.00774329	0.0195693	0.363087
0.0689211	0.675167	0.135048	0.0900768	0.0272915	0.0021321	0.0133284	0	0.277173	0.225891	0.0474537	0.0108554	0.00427903	0.0101211	0.0196295	0.0067715	0.00435683	0.0197932	0.0353716	0.0074056	0.00637404	0.0124665	0.0216646	0.00533434	0.0104956	0.0410277	0.0457355	0.0807719	0.00155885	0.00388253	0.00526914	0.178557	0	0.357577	0.00731346	0.018516	0.362896
0.0678985	0.675071	0.135192	0.0874515	0.0283004	0.00206277	0.0131172	0	0.273514	0.227719	0.0473153	0.0107464	0.00427856	0.0101211	0.0196298	0.00677115	0.00435683	0.019789	0.0353714	0.0074056	0.00634135	0.0123652	0.0216646	0.00533434	0.0104966	0.0410272	0.0457352	0.0807719	0.00155885	0.00388253	0.00521156	0.178557	0	0.363339	0.00742727	0.0188374	0.363347
0.0686523	0.675026	0.135274	0.0862879	0.02876	0.00203024	0.0130188	0	0.27188	0.22858	0.0472504	0.0106952	0.00427834	0.0101211	0.01963	0.00677098	0.00435683	0.0197871	0.0353713	0.0074056	0.00632596	0.0123175	0.0216646	0.00533434	0.010497	0.041027	0.045735	0.0807719	0.00155885	0.00388253	0.00518445	0.178557	0	0.359796	0.00735082	0.0186762	0.364379
0.0650683	0.674851	0.135196	0.0808295	0.030347	0.00190235	0.0126188	0	0.264355	0.231687	0.0469954	0.0104977	0.00427748	0.0101211	0.0196307	0.00677034	0.00435683	0.0197795	0.0353709	0.0074056	0.00626672	0.0121338	0.0216646	0.00533434	0.0104987	0.0410262	0.0457345	0.0807719	0.00155885	0.00388253	0.00508008	0.178557	0	0.380162	0.00776266	0.0197569	0.364734
0.0669353	0.674842	0.135345	0.0808874	0.0305187	0.00189637	0.012605	0	0.264394	0.231943	0.0469834	0.0104869	0.00427744	0.0101211	0.0196307	0.0067703	0.00435683	0.0197791	0.0353709	0.0074056	0.00626347	0.0121237	0.0216646	0.00533434	0.0104988	0.0410262	0.0457345	0.0807719	0.00155885	0.00388253	0.00507437	0.178557	0	0.370167	0.00755439	0.0192601	0.365877
0.0672097	0.674783	0.13544	0.0793165	0.0311274	0.00185405	0.0124764	0	0.262199	0.233059	0.0468989	0.0104204	0.00427715	0.0101211	0.0196309	0.00677009	0.00435683	0.0197766	0.0353708	0.0074056	0.0062435	0.0120618	0.0216646	0.00533434	0.0104994	0.0410259	0.0457343	0.0807719	0.00155885	0.00388253	0.00503918	0.178557	0	0.36934	0.00753334	0.0192393	0.366739
0.0693616	0.674778	0.1356	0.0795154	0.0312745	0.00185136	0.0124731	0	0.262433	0.233245	0.0468934	0.0104146	0.00427712	0.0101211	0.0196309	0.00677007	0.00435683	0.0197763	0.0353708	0.0074056	0.00624175	0.0120564	0.0216646	0.00533434	0.0104995	0.0410259	0.0457343	0.0807719	0.00155885	0.00388253	0.00503611	0.178557	0	0.358622	0.00731063	0.0187023	0.367887
0.0721112	0.674785	0.135772	0.0800908	0.0313219	0.00185735	0.012497	0	0.263187	0.233225	0.0469052	0.0104221	0.00427716	0.0101211	0.0196309	0.00677009	0.00435683	0.0197766	0.0353708	0.0074056	0.00624402	0.0120634	0.0216646	0.00533434	0.0104994	0.0410259	0.0457343	0.0807719	0.00155885	0.00388253	0.00504009	0.178557	0	0.345733	0.00704393	0.0180505	0.36911
0.0735892	0.674756	0.135909	0.0794769	0.0316962	0.00183658	0.0124366	0	0.262307	0.233844	0.0468637	0.0103885	0.00427701	0.0101211	0.019631	0.00676998	0.00435683	0.0197754	0.0353707	0.0074056	0.00623394	0.0120321	0.0216646	0.00533434	0.0104997	0.0410258	0.0457342	0.0807719	0.00155885	0.00388253	0.00502234	0.178557	0	0.339633	0.00691573	0.0177517	0.370105
0.0719399	0.674647	0.135988	0.0763187	0.0327872	0.00175771	0.0121936	0	0.257929	0.235861	0.0467064	0.0102655	0.00427648	0.0101211	0.0196314	0.00676959	0.00435683	0.0197706	0.0353705	0.0074056	0.00619702	0.0119177	0.0216646	0.00533434	0.0105008	0.0410253	0.0457339	0.0807719	0.00155885	0.00388253	0.0049573	0.178557	0	0.348357	0.0213491	0.0182277	0.370548
0.075527	0.674669	0.136176	0.0773579	0.0327182	0.0017746	0.0122518	0	0.259324	0.235587	0.0467399	0.0102898	0.00427658	0.0101211	0.0196314	0.00676966	0.00435683	0.0197716	0.0353705	0.0074056	0.00620431	0.0119403	0.0216646	0.00533434	0.0105006	0.0410254	0.0457339	0.0807719	0.00155885	0.00388253	0.00497014	0.178557	0	0.332781	0.0253222	0.0174315	0.371861
0.0757311	0.674607	0.136307	0.0757166	0.0334115	0.00173003	0.012117	0	0.257031	0.236796	0.0466509	0.0102194	0.00427628	0.0101211	0.0196316	0.00676944	0.00435683	0.0197689	0.0353704	0.0074056	0.00618318	0.0118748	0.0216646	0.00533434	0.0105012	0.0410251	0.0457338	0.0807719	0.00155885	0.00388253	0.00493293	0.178557	0	0.332924	0.0265027	0.0174576	0.372569
0.0770474	0.67457	0.136461	0.0748931	0.0338824	0.00170418	0.0120411	0	0.255863	0.237559	0.0465993	0.0101778	0.0042761	0.0101211	0.0196317	0.0067693	0.00435683	0.0197673	0.0353703	0.0074056	0.0061707	0.0118361	0.0216646	0.00533434	0.0105016	0.0410249	0.0457336	0.0807719	0.00155885	0.00388253	0.00491094	0.178557	0	0.328333	0.0272916	0.0172349	0.373445
0.0808962	0.674586	0.136642	0.0757233	0.0338742	0.00171684	0.0120858	0	0.256974	0.237388	0.0466244	0.0101956	0.00427617	0.0101211	0.0196317	0.00676936	0.00435683	0.019768	0.0353703	0.0074056	0.00617605	0.0118526	0.0216646	0.00533434	0.0105014	0.041025	0.0457337	0.0807719	0.00155885	0.00388253	0.00492036	0.178557	0	0.313826	0.0271905	0.0164905	0.374738
0.0811785	0.674525	0.136793	0.0741322	0.0345848	0.00167311	0.011954	0	0.25475	0.238596	0.0465371	0.0101263	0.00427587	0.0101211	0.0196319	0.00676913	0.00435683	0.0197653	0.0353702	0.0074056	0.00615526	0.0117882	0.0216646	0.00533434	0.010502	0.0410247	0.0457335	0.0807719	0.00155885	0.00388253	0.00488373	0.178557	0	0.31392	0.0283051	0.0165123	0.375394
0.0823875	0.674483	0.136958	0.0731269	0.0351326	0.00164293	0.0118648	0	0.253334	0.239479	0.0464768	0.0100779	0.00427566	0.0101211	0.0196321	0.00676898	0.00435683	0.0197635	0.0353701	0.0074056	0.00614073	0.0117432	0.0216646	0.00533434	0.0105024	0.0410245	0.0457334	0.0807719	0.00155885	0.00388253	0.00485815	0.178557	0	0.310552	0.0290978	0.0163516	0.376185
0.0838461	0.674444	0.137129	0.0722529	0.0356499	0.00161577	0.0117851	0	0.252098	0.240292	0.0464225	0.0100341	0.00427547	0.0101211	0.0196322	0.00676884	0.00435683	0.0197618	0.03537	0.0074056	0.00612759	0.0117024	0.0216646	0.00533434	0.0105028	0.0410243	0.0457332	0.0807719	0.00155885	0.00388253	0.004835	0.178557	0	0.306439	0.0297962	0.016151	0.376996
0.0814799	0.674331	0.137306	0.0690938	0.0368939	0.0015341	0.0115359	0	0.247709	0.242467	0.0462595	0.00990582	0.00427492	0.0101211	0.0196326	0.00676842	0.00435683	0.0197569	0.0353697	0.0074056	0.00608909	0.011583	0.0216646	0.00533434	0.0105039	0.0410238	0.0457329	0.0807719	0.00155885	0.00388253	0.00476717	0.178557	0	0.316738	0.0319202	0.0167102	0.377061
0.082151	0.674278	0.137498	0.0677904	0.0375781	0.00149622	0.0114233	0	0.245879	0.243566	0.0461838	0.00984522	0.00427466	0.0101211	0.0196328	0.00676822	0.00435683	0.0197546	0.0353696	0.0074056	0.0060709	0.0115266	0.0216646	0.00533434	0.0105045	0.0410236	0.0457327	0.0807719	0.00155885	0.00388253	0.00473514	0.178557	0	0.315615	0.0329281	0.016667	0.377662
0.0880413	0.67432	0.137674	0.069391	0.0373326	0.0015281	0.0115275	0	0.248059	0.24292	0.0462472	0.00989289	0.00427486	0.0101211	0.0196327	0.00676838	0.00435683	0.0197564	0.0353697	0.0074056	0.00608521	0.011571	0.0216646	0.00533434	0.010504	0.0410238	0.0457329	0.0807719	0.00155885	0.00388253	0.00476033	0.178557	0	0.295937	0.0319289	0.0156427	0.379255
0.0856046	0.67421	0.137893	0.0663834	0.0385921	0.00144894	0.0112871	0.000739589	0.243876	0.245069	0.0460892	0.00976807	0.00427432	0.0101211	0.0196331	0.00676797	0.00435683	0.0197516	0.0353695	0.0074056	0.00604775	0.0114549	0.0216646	0.00533434	0.0105051	0.0410233	0.0457325	0.0807719	0.00155885	0.00388253	0.00469435	0.178557	0	0.305912	0.0340974	0.0161851	0.378902
0.0895093	0.674212	0.138079	0.066739	0.0387536	0.00145106	0.0112988	0.0012541	0.244338	0.245172	0.0460933	0.00976953	0.00427433	0.0101211	0.0196331	0.00676798	0.00435683	0.0197517	0.0353695	0.0074056	0.00604819	0.0114562	0.0216646	0.00533434	0.0105051	0.0410233	0.0457325	0.0807719	0.00155885	0.00388253	0.00469512	0.178557	0	0.294123	0.0338365	0.0155757	0.379856
0.0875993	0.674113	0.138322	0.0640913	0.0399389	0.00137985	0.0110837	0.00137398	0.240649	0.247146	0.0459511	0.0096568	0.00427384	0.0101211	0.0196335	0.00676761	0.00435683	0.0197474	0.0353693	0.0074056	0.00601436	0.0113513	0.0216646	0.00533434	0.0105061	0.0410228	0.0457322	0.0807719	0.00155885	0.00388253	0.00463553	0.178557	0	0.3022	0.035851	0.016018	0.379791
0.0900907	0.674088	0.13853	0.0636782	0.0403755	0.00136313	0.0110373	0.00143556	0.24005	0.247737	0.0459177	0.00962886	0.00427372	0.0101211	0.0196336	0.00676752	0.00435683	0.0197463	0.0353692	0.0074056	0.00600597	0.0113253	0.0216646	0.00533434	0.0105064	0.0410227	0.0457321	0.0807719	0.00155885	0.00388253	0.00462076	0.178557	0	0.295532	0.0361248	0.0156786	0.380617
0.0904399	0.674027	0.138771	0.062195	0.0411966	0.00131993	0.0109093	0.00152901	0.23797	0.249015	0.0458313	0.00955956	0.00427342	0.0101211	0.0196338	0.0067673	0.00435683	0.0197436	0.0353691	0.0074056	0.00598518	0.0112609	0.0216646	0.00533434	0.010507	0.0410224	0.045732	0.0807719	0.00155885	0.00388253	0.00458412	0.178557	0	0.296146	0.0372707	0.0157251	0.380958
0.0936067	0.67401	0.138979	0.0620129	0.0415632	0.00130892	0.0108806	0.00158525	0.23769	0.249466	0.0458092	0.00954047	0.00427334	0.0101211	0.0196339	0.00676723	0.00435683	0.0197429	0.035369	0.0074056	0.00597945	0.0112431	0.0216646	0.00533434	0.0105071	0.0410223	0.0457319	0.0807719	0.00155885	0.00388253	0.00457403	0.178557	0	0.287895	0.0372769	0.0153003	0.38188
0.0945356	0.673958	0.139226	0.0607869	0.0423159	0.00127183	0.0107718	0.00167446	0.235966	0.250599	0.0457351	0.00948058	0.00427308	0.0101211	0.0196341	0.00676704	0.00435683	0.0197406	0.0353689	0.0074056	0.00596148	0.0111874	0.0216646	0.00533434	0.0105077	0.0410221	0.0457317	0.0807719	0.00155885	0.00388253	0.00454237	0.178557	0	0.286889	0.0381914	0.01526	0.382295
0.097147	0.673929	0.139452	0.0602582	0.0428201	0.00125215	0.0107165	0.00174275	0.235207	0.251282	0.0456957	0.00944789	0.00427293	0.0101211	0.0196342	0.00676693	0.00435683	0.0197394	0.0353688	0.0074056	0.00595166	0.011157	0.0216646	0.00533434	0.0105079	0.041022	0.0457317	0.0807719	0.00155885	0.00388253	0.00452509	0.178557	0	0.281005	0.0384362	0.0149596	0.383046
0.0969899	0.67386	0.139737	0.0585843	0.0437699	0.00120339	0.0105723	0.00185093	0.232861	0.252738	0.0455983	0.00936956	0.0042726	0.0101211	0.0196344	0.00676668	0.00435683	0.0197364	0.0353687	0.0074056	0.00592816	0.0110841	0.0216646	0.00533434	0.0105086	0.0410216	0.0457314	0.0807719	0.00155885	0.00388253	0.00448368	0.178557	0	0.283278	0.0397921	0.0150934	0.383187
0.0982334	0.673811	0.140015	0.0575284	0.0445039	0.001169	0.0104728	0.00194439	0.231364	0.253826	0.0455295	0.00931355	0.00427235	0.0101211	0.0196346	0.0067665	0.00435683	0.0197342	0.0353686	0.0074056	0.00591135	0.011032	0.0216646	0.00533434	0.0105091	0.0410214	0.0457313	0.0807719	0.00155885	0.00388253	0.00445407	0.178557	0	0.281459	0.0405839	0.0150089	0.383571
0.098233	0.673745	0.140364	0.0561388	0.0454042	0.00112234	0.0103377	0.0020651	0.229382	0.25526	0.0454362	0.00923775	0.00427202	0.0101211	0.0196349	0.00676625	0.00435683	0.0197313	0.0353684	0.0074056	0.0058886	0.0109614	0.0216646	0.00533434	0.0105098	0.0410211	0.0457311	0.0807719	0.00155885	0.00388253	0.004414	0.178557	0	0.283199	0.041898	0.0151141	0.38352
0.0996577	0.673697	0.140692	0.0553072	0.0461012	0.00108977	0.0102459	0.00216788	0.228174	0.256326	0.045371	0.00918401	0.00427179	0.0101211	0.0196351	0.00676608	0.00435683	0.0197293	0.0353683	0.0074056	0.00587248	0.0109114	0.0216646	0.00533434	0.0105103	0.0410209	0.0457309	0.0807719	0.00155885	0.00388253	0.00438559	0.178557	0	0.280838	0.0426273	0.0150004	0.383772
0.103877	0.673685	0.140952	0.0554247	0.0464131	0.00108242	0.0102306	0.00223243	0.228287	0.256713	0.0453561	0.00917	0.00427173	0.0101211	0.0196351	0.00676603	0.00435683	0.0197287	0.0353683	0.0074056	0.00586827	0.0108984	0.0216646	0.00533434	0.0105104	0.0410208	0.0457309	0.0807719	0.00155885	0.00388253	0.00437818	0.178557	0	0.271096	0.0424582	0.014491	0.384649
0.104152	0.673622	0.14132	0.0541447	0.047324	0.00103834	0.0101039	0.00235481	0.226458	0.258105	0.045268	0.00909805	0.00427142	0.0101211	0.0196353	0.0067658	0.00435683	0.019726	0.0353681	0.0074056	0.00584668	0.0108315	0.0216646	0.00533434	0.010511	0.0410205	0.0457307	0.0807719	0.00155885	0.00388253	0.00434015	0.178557	0	0.272033	0.043996	0.0145519	0.384617
0.102451	0.673534	0.141759	0.0522167	0.0485457	0.000976634	0.00992417	0.00250919	0.223726	0.259996	0.0451446	0.00899809	0.00427099	0.0101211	0.0196357	0.00676548	0.00435683	0.0197222	0.0353679	0.0074056	0.00581668	0.0107385	0.0216646	0.00533434	0.0105119	0.0410201	0.0457304	0.0807719	0.00155885	0.00388253	0.00428731	0.178557	0	0.278191	0.046383	0.0148922	0.38409
0.105988	0.673511	0.142049	0.0520114	0.0490251	0.000961434	0.00988497	0.00258755	0.223396	0.260613	0.0451141	0.00897167	0.00427087	0.0101211	0.0196358	0.00676539	0.00435683	0.0197211	0.0353679	0.0074056	0.00580875	0.0107139	0.0216646	0.00533434	0.0105121	0.04102	0.0457304	0.0807719	0.00155885	0.00388253	0.00427334	0.178557	0	0.270455	0.0464125	0.0144888	0.384813
0.106141	0.673447	0.142452	0.0507068	0.0500164	0.000916405	0.00975592	0.00271845	0.221533	0.262066	0.045024	0.00889793	0.00427055	0.0101211	0.019636	0.00676515	0.00435683	0.0197183	0.0353678	0.0074056	0.00578663	0.0106453	0.0216646	0.00533434	0.0105128	0.0410197	0.0457302	0.0807719	0.00155885	0.00388253	0.00423436	0.178557	0	0.271569	0.0478931	0.0145592	0.38471
0.106168	0.67338	0.14287	0.0493709	0.0510488	0.000870374	0.00962409	0.00285379	0.219627	0.263561	0.0449319	0.0088225	0.00427023	0.0101211	0.0196363	0.00676491	0.00435683	0.0197154	0.0353676	0.0074056	0.00576399	0.0105751	0.0216646	0.00533434	0.0105134	0.0410194	0.04573	0.0807719	0.00155885	0.00388253	0.00419448	0.178557	0	0.272962	0.0493965	0.0146447	0.384558
0.107818	0.673333	0.143242	0.0485225	0.0518698	0.000837904	0.00953306	0.00296613	0.218404	0.264683	0.0448669	0.00876855	0.00426999	0.0101211	0.0196364	0.00676473	0.00435683	0.0197134	0.0353675	0.0074056	0.0057478	0.0105249	0.0216646	0.00533434	0.0105139	0.0410192	0.0457298	0.0807719	0.00155885	0.00388253	0.00416596	0.178557	0	0.27018	0.0500977	0.0145063	0.384802
0.108135	0.67327	0.14367	0.0472786	0.0529052	0.000794346	0.00940896	0.00310136	0.216628	0.266131	0.0447797	0.00869687	0.00426968	0.0101211	0.0196367	0.0067645	0.00435683	0.0197106	0.0353674	0.0074056	0.00572629	0.0104582	0.0216646	0.00533434	0.0105145	0.0410189	0.0457296	0.0807719	0.00155885	0.00388253	0.00412807	0.178557	0	0.270737	0.0513652	0.014547	0.384698
0.112305	0.673249	0.143963	0.0470874	0.0534228	0.00078085	0.00937459	0.00317858	0.216328	0.266723	0.0447526	0.00867313	0.00426958	0.0101211	0.0196368	0.00676442	0.00435683	0.0197097	0.0353673	0.0074056	0.00571916	0.0104361	0.0216646	0.00533434	0.0105147	0.0410188	0.0457295	0.0807719	0.00155885	0.00388253	0.00411552	0.178557	0	0.261939	0.0507786	0.0140848	0.385557
0.110286	0.673161	0.144498	0.0452173	0.054828	0.000719348	0.00919736	0.0033542	0.213676	0.268714	0.0446296	0.00857262	0.00426914	0.0101211	0.0196371	0.0067641	0.00435683	0.0197059	0.0353671	0.0074056	0.005689	0.0103426	0.0216646	0.00533434	0.0105156	0.0410184	0.0457293	0.0807719	0.00155885	0.00388253	0.00406238	0.178557	0	0.267966	0.0530073	0.0144197	0.384848
0.110379	0.673096	0.144967	0.0439178	0.0559666	0.000674105	0.00906875	0.0034998	0.211825	0.270249	0.044539	0.00849798	0.00426882	0.0101211	0.0196374	0.00676385	0.00435683	0.019703	0.035367	0.0074056	0.0056666	0.0102731	0.0216646	0.00533434	0.0105163	0.0410181	0.0457291	0.0807719	0.00155885	0.00388253	0.00402293	0.178557	0	0.268923	0.054211	0.0144821	0.38465
0.114354	0.673071	0.145282	0.0436111	0.0565781	0.000657949	0.00902641	0.00358458	0.211368	0.270936	0.0445066	0.00846992	0.0042687	0.0101211	0.0196374	0.00676376	0.00435683	0.019702	0.0353669	0.0074056	0.00565818	0.010247	0.0216646	0.00533434	0.0105165	0.041018	0.045729	0.0807719	0.00155885	0.00388253	0.00400809	0.178557	0	0.260673	0.0534459	0.0140486	0.385456
0.114838	0.67301	0.145751	0.0424036	0.0577064	0.000615549	0.00890641	0.00372756	0.209649	0.272407	0.0444217	0.00839971	0.00426839	0.0101211	0.0196377	0.00676354	0.00435683	0.0196993	0.0353668	0.0074056	0.00563711	0.0101817	0.0216646	0.00533434	0.0105171	0.0410177	0.0457288	0.0807719	0.00155885	0.00388253	0.00397098	0.178557	0	0.260662	0.0543762	0.0140584	0.385342
0.118169	0.672976	0.146108	0.0418565	0.0584706	0.000592847	0.00884461	0.00382763	0.208859	0.273298	0.0443762	0.00836112	0.00426823	0.0101211	0.0196378	0.00676341	0.00435683	0.0196978	0.0353667	0.0074056	0.00562553	0.0101458	0.0216646	0.00533434	0.0105175	0.0410176	0.0457287	0.0807719	0.00155885	0.00388253	0.00395058	0.178557	0	0.254403	0.0543351	0.0137302	0.38593
0.110782	0.672834	0.146958	0.0387663	0.0607846	0.00049402	0.00855891	0.00410741	0.204495	0.276506	0.0441785	0.00819978	0.00426753	0.0101211	0.0196384	0.00676289	0.00435683	0.0196916	0.0353664	0.0074056	0.00557711	0.00999568	0.0216646	0.00533434	0.0105189	0.0410169	0.0457283	0.0807719	0.00155885	0.00388253	0.00386529	0.178557	0	0.272567	0.0599858	0.0147195	0.383649
0.11906	0.672851	0.147094	0.0394057	0.0608599	0.000507299	0.00860298	0.00412517	0.205376	0.276321	0.0442049	0.00821912	0.00426761	0.0101211	0.0196383	0.00676295	0.00435683	0.0196924	0.0353664	0.0074056	0.00558292	0.0100137	0.0216646	0.00533434	0.0105187	0.041017	0.0457283	0.0807719	0.00155885	0.00388253	0.00387551	0.178557	0	0.254771	0.0581327	0.0137659	0.385579
0.120575	0.672799	0.147537	0.0384087	0.0618983	0.000471439	0.00850241	0.00425639	0.203956	0.277615	0.0441331	0.00815932	0.00426735	0.0101211	0.0196385	0.00676276	0.00435683	0.0196901	0.0353663	0.0074056	0.00556497	0.00995804	0.0216646	0.00533434	0.0105192	0.0410167	0.0457282	0.0807719	0.00155885	0.00388253	0.0038439	0.178557	0	0.252681	0.0597093	0.0136603	0.385684
0.12054	0.672732	0.148004	0.0370811	0.0630138	0.000425214	0.00837086	0.00440246	0.202064	0.279165	0.0440406	0.00808316	0.00426702	0.0101211	0.0196387	0.00676251	0.00435683	0.0196872	0.0353661	0.0074056	0.00554212	0.00988718	0.0216646	0.00533434	0.0105199	0.0410164	0.0457279	0.0807719	0.00155885	0.00388253	0.00380364	0.178557	0	0.253709	0.0611785	0.0137249	0.3855
0.120625	0.672667	0.148468	0.0357877	0.0641148	0.000379787	0.00824179	0.00454747	0.200219	0.280693	0.0439497	0.00800825	0.0042667	0.0101211	0.019639	0.00676227	0.00435683	0.0196843	0.035366	0.0074056	0.00551964	0.00981748	0.0216646	0.00533434	0.0105206	0.0410161	0.0457277	0.0807719	0.00155885	0.00388253	0.00376403	0.178557	0	0.254486	0.0625501	0.0137761	0.385335
0.120162	0.672596	0.148967	0.0343896	0.0653044	0.000330876	0.00810274	0.00470327	0.198226	0.282338	0.0438518	0.0079276	0.00426635	0.0101211	0.0196393	0.006762	0.00435683	0.0196812	0.0353658	0.0074056	0.00549544	0.00974244	0.0216646	0.00533434	0.0105213	0.0410158	0.0457275	0.0807719	0.00155885	0.00388253	0.0037214	0.178557	0	0.256438	0.0642248	0.0138909	0.385003
0.120506	0.672532	0.149435	0.0331678	0.0663952	0.000287218	0.00797919	0.00484735	0.19648	0.283828	0.0437644	0.00785541	0.00426604	0.0101211	0.0196395	0.00676177	0.00435683	0.0196784	0.0353657	0.0074056	0.00547377	0.00967527	0.0216646	0.00533434	0.0105219	0.0410155	0.0457273	0.0807719	0.00155885	0.00388253	0.00368324	0.178557	0	0.256687	0.0654852	0.0139134	0.384866
0.122725	0.672486	0.149818	0.0323268	0.0672409	0.000255379	0.00789014	0.00496164	0.195272	0.284951	0.0437006	0.00780235	0.00426581	0.0101211	0.0196397	0.0067616	0.00435683	0.0196764	0.0353656	0.0074056	0.00545785	0.00962591	0.0216646	0.00533434	0.0105224	0.0410153	0.0457272	0.0807719	0.00155885	0.00388253	0.00365519	0.178557	0	0.253023	0.0657332	0.0137236	0.385213
0.123081	0.672423	0.150299	0.0311166	0.0683556	0.000211777	0.00776703	0.00510846	0.193542	0.286453	0.0436134	0.00773013	0.00426549	0.0101211	0.0196399	0.00676136	0.00435683	0.0196737	0.0353654	0.0074056	0.00543618	0.00955871	0.0216646	0.00533434	0.010523	0.041015	0.045727	0.0807719	0.00155885	0.00388253	0.00361701	0.178557	0	0.253277	0.0669858	0.0137461	0.385046
0.125667	0.672378	0.150678	0.0303317	0.0691854	0.000181583	0.00768292	0.00522023	0.192412	0.287534	0.0435529	0.00767968	0.00426527	0.0101211	0.0196401	0.0067612	0.00435683	0.0196717	0.0353653	0.0074056	0.00542103	0.00951176	0.0216646	0.00533434	0.0105234	0.0410148	0.0457268	0.0807719	0.00155885	0.00388253	0.00359034	0.178557	0	0.249043	0.0670354	0.0135247	0.385449
0.128355	0.672334	0.15106	0.029546	0.0700247	0.000151353	0.00759875	0.00533276	0.191282	0.28862	0.0434923	0.00762914	0.00426505	0.0101211	0.0196403	0.00676104	0.00435683	0.0196698	0.0353652	0.0074056	0.00540587	0.00946474	0.0216646	0.00533434	0.0105239	0.0410146	0.0457267	0.0807719	0.00155885	0.00388253	0.00356362	0.178557	0	0.244797	0.0670448	0.0133024	0.385848
0.128627	0.67227	0.151563	0.0283309	0.0711893	0.000107193	0.00747439	0.00548518	0.189544	0.29016	0.0434039	0.00755584	0.00426474	0.0101211	0.0196405	0.0067608	0.00435683	0.019667	0.0353651	0.0074056	0.00538387	0.00939654	0.0216646	0.00533434	0.0105245	0.0410143	0.0457265	0.0807719	0.00155885	0.00388253	0.00352487	0.178557	0	0.24526	0.0683291	0.0133357	0.385613
0.128505	0.672202	0.152094	0.0270552	0.0724189	6.08632e-05	0.00734394	0.00564553	0.18772	0.291777	0.0433112	0.00747892	0.0042644	0.0101211	0.0196408	0.00676055	0.00435683	0.019664	0.0353649	0.0074056	0.00536079	0.00932498	0.0216646	0.00533434	0.0105252	0.041014	0.0457263	0.0807719	0.00155885	0.00388253	0.00348421	0.178557	0	0.246488	0.0698375	0.0134105	0.385258
0.127288	0.672126	0.152688	0.0255985	0.0738078	8.37086e-06	0.00719593	0.00582563	0.185639	0.293605	0.0432061	0.00739184	0.00426403	0.0101211	0.0196411	0.00676027	0.00435683	0.0196607	0.0353648	0.0074056	0.00533466	0.00924396	0.0216646	0.00533434	0.010526	0.0410136	0.0457261	0.0807719	0.00155885	0.00388253	0.00343818	0.178557	0	0.24986	0.0719792	0.0136021	0.384592
0.129183	0.672075	0.153133	0.0246839	0.0748035	-2.65024e-05	0.00709882	0.00595647	0.184326	0.294868	0.0431362	0.00733351	0.00426377	0.0101211	0.0196413	0.00676008	0.00435683	0.0196585	0.0353647	0.0074056	0.00531715	0.00918969	0.0216646	0.00533434	0.0105265	0.0410134	0.0457259	0.0807719	0.00155885	0.00388253	0.00340734	0.178557	0	0.247209	0.0723928	0.0134657	0.384721
0.130642	0.67202	0.153607	0.023692	0.0758731	-6.40136e-05	0.00699421	0.00609618	0.182902	0.296222	0.0430611	0.00727082	0.0042635	0.0101211	0.0196415	0.00675987	0.00435683	0.0196561	0.0353645	0.0074056	0.00529834	0.00913136	0.0216646	0.00533434	0.010527	0.0410131	0.0457257	0.0807719	0.00155885	0.00388253	0.0033742	0.178557	0	0.245463	0.0730546	0.0133784	0.384713
0.130798	0.671955	0.154154	0.0224905	0.0771262	-0.000108638	0.00686932	0.00625857	0.181182	0.297818	0.0429717	0.00719641	0.00426318	0.0101211	0.0196417	0.00675963	0.00435683	0.0196532	0.0353644	0.0074056	0.00527601	0.00906212	0.0216646	0.00533434	0.0105277	0.0410128	0.0457255	0.0807719	0.00155885	0.00388253	0.00333486	0.178557	0	0.246199	0.0744541	0.0134261	0.384345
0.133892	0.671912	0.15456	0.0217551	0.0780205	-0.000137754	0.00678899	0.00637545	0.180122	0.298908	0.0429134	0.00714739	0.00426297	0.0101211	0.0196419	0.00675947	0.00435683	0.0196514	0.0353643	0.0074056	0.0052613	0.00901651	0.0216646	0.00533434	0.0105281	0.0410126	0.0457254	0.0807719	0.00155885	0.00388253	0.00330895	0.178557	0	0.241526	0.0742036	0.0131788	0.384724
0.131297	0.671826	0.155262	0.0201371	0.0796557	-0.000196756	0.00662327	0.00658532	0.177809	0.301	0.0427952	0.00704921	0.00426254	0.0101211	0.0196422	0.00675916	0.00435683	0.0196476	0.0353641	0.0074056	0.00523184	0.00892517	0.0216646	0.00533434	0.010529	0.0410122	0.0457251	0.0807719	0.00155885	0.00388253	0.00325705	0.178557	0	0.24735	0.077188	0.0135041	0.383601
0.13321	0.671774	0.15574	0.0192264	0.0807281	-0.000232012	0.0065256	0.00672382	0.176501	0.302309	0.0427246	0.00699	0.00426229	0.0101211	0.0196424	0.00675896	0.00435683	0.0196453	0.035364	0.0074056	0.00521407	0.00887007	0.0216646	0.00533434	0.0105295	0.041012	0.045725	0.0807719	0.00155885	0.00388253	0.00322574	0.178557	0	0.244845	0.0775943	0.0133747	0.383646
0.137323	0.671738	0.156115	0.0186281	0.0815461	-0.000256618	0.00645837	0.00682962	0.175636	0.303264	0.0426753	0.00694828	0.00426211	0.0101211	0.0196425	0.00675883	0.00435683	0.0196437	0.0353639	0.0074056	0.00520155	0.00883126	0.0216646	0.00533434	0.0105298	0.0410118	0.0457249	0.0807719	0.00155885	0.00388253	0.00320369	0.178557	0	0.238542	0.0767588	0.0130375	0.384231
0.136466	0.671665	0.156748	0.0173068	0.0830012	-0.00030609	0.00632038	0.00701554	0.173744	0.305065	0.0425762	0.00686555	0.00426175	0.0101211	0.0196428	0.00675856	0.00435683	0.0196406	0.0353637	0.0074056	0.00517672	0.00875428	0.0216646	0.00533434	0.0105306	0.0410115	0.0457246	0.0807719	0.00155885	0.00388253	0.00315996	0.178557	0	0.241089	0.0787581	0.0131838	0.383522
0.137041	0.671603	0.157317	0.0161961	0.084296	-0.000348484	0.0062027	0.00718069	0.172151	0.306636	0.0424913	0.00679441	0.00426144	0.0101211	0.0196431	0.00675833	0.00435683	0.0196379	0.0353636	0.0074056	0.00515537	0.00868809	0.0216646	0.00533434	0.0105312	0.0410112	0.0457244	0.0807719	0.00155885	0.00388253	0.00312235	0.178557	0	0.241135	0.0799585	0.0131934	0.383158
0.141154	0.671565	0.157715	0.015569	0.0851737	-0.000374154	0.00613262	0.00729245	0.171246	0.307642	0.0424398	0.00675085	0.00426125	0.0101211	0.0196432	0.00675819	0.00435683	0.0196362	0.0353635	0.0074056	0.0051423	0.00864756	0.0216646	0.00533434	0.0105316	0.041011	0.0457243	0.0807719	0.00155885	0.00388253	0.00309932	0.178557	0	0.235149	0.0791345	0.0128726	0.383674
0.140939	0.671497	0.158337	0.0143567	0.0865968	-0.000420291	0.00600455	0.00747277	0.169508	0.309356	0.0423474	0.00667341	0.00426091	0.0101211	0.0196435	0.00675794	0.00435683	0.0196332	0.0353634	0.0074056	0.00511906	0.00857551	0.0216646	0.00533434	0.0105323	0.0410107	0.0457241	0.0807719	0.00155885	0.00388253	0.00305838	0.178557	0	0.236563	0.080784	0.0129567	0.383081
0.143267	0.671446	0.15884	0.0134782	0.0877316	-0.000454836	0.00590945	0.00761599	0.168245	0.310679	0.0422782	0.00661509	0.00426066	0.0101211	0.0196437	0.00675775	0.00435683	0.019631	0.0353632	0.0074056	0.00510156	0.00852125	0.0216646	0.00533434	0.0105328	0.0410105	0.045724	0.0807719	0.00155885	0.00388253	0.00302755	0.178557	0	0.23377	0.0809954	0.0128103	0.383103
0.144439	0.671387	0.159407	0.0124504	0.0890234	-0.000494721	0.00579935	0.0077785	0.16677	0.312194	0.0421982	0.00654788	0.00426037	0.0101211	0.0196439	0.00675753	0.00435683	0.0196284	0.0353631	0.0074056	0.00508139	0.00845871	0.0216646	0.00533434	0.0105334	0.0410102	0.0457238	0.0807719	0.00155885	0.00388253	0.00299202	0.178557	0	0.232928	0.0818706	0.0127706	0.382818
0.14318	0.671312	0.160104	0.0111251	0.0906243	-0.000545304	0.00565918	0.00797951	0.164871	0.314092	0.0420969	0.00646285	0.00426	0.0101211	0.0196442	0.00675726	0.00435683	0.0196252	0.0353629	0.0074056	0.00505587	0.0083796	0.0216646	0.00533434	0.0105341	0.0410099	0.0457235	0.0807719	0.00155885	0.00388253	0.00294707	0.178557	0	0.236055	0.0841581	0.0129484	0.381914
0.145336	0.67126	0.160636	0.0102263	0.0918328	-0.000580818	0.00556167	0.00813021	0.163579	0.315471	0.0420257	0.00640276	0.00425974	0.0101211	0.0196444	0.00675706	0.00435683	0.0196229	0.0353628	0.0074056	0.00503784	0.00832369	0.0216646	0.00533434	0.0105346	0.0410096	0.0457234	0.0807719	0.00155885	0.00388253	0.00291531	0.178557	0	0.233628	0.0844754	0.0128216	0.38184
0.146705	0.671202	0.161216	0.00922985	0.0931555	-0.000619898	0.00545421	0.00829468	0.162149	0.316983	0.0419474	0.00633669	0.00425946	0.0101211	0.0196446	0.00675685	0.00435683	0.0196203	0.0353627	0.0074056	0.00501801	0.00826222	0.0216646	0.00533434	0.0105352	0.0410094	0.0457232	0.0807719	0.00155885	0.00388253	0.00288038	0.178557	0	0.232527	0.0852602	0.0127673	0.381551
0.151289	0.671163	0.161647	0.00859482	0.094126	-0.000645981	0.00538338	0.00841407	0.161234	0.318039	0.0418951	0.0062922	0.00425926	0.0101211	0.0196447	0.0067567	0.00435683	0.0196186	0.0353626	0.0074056	0.00500466	0.00822082	0.0216646	0.00533434	0.0105356	0.0410092	0.0457231	0.0807719	0.00155885	0.00388253	0.00285686	0.178557	0	0.22652	0.0842176	0.0124435	0.382013
0.153777	0.671111	0.162192	0.00772156	0.0953478	-0.000681095	0.00528738	0.00856717	0.159978	0.319421	0.0418247	0.00623262	0.004259	0.0101211	0.0196449	0.00675651	0.00435683	0.0196164	0.0353625	0.0074056	0.00498678	0.00816538	0.0216646	0.00533434	0.0105361	0.0410089	0.0457229	0.0807719	0.00155885	0.00388253	0.00282536	0.178557	0	0.223825	0.0843722	0.0123012	0.381943
0.155321	0.671053	0.162806	0.00681723	0.0966025	-0.000719887	0.00518213	0.00873893	0.158665	0.320936	0.0417469	0.00616662	0.00425872	0.0101211	0.0196452	0.00675629	0.00435683	0.0196138	0.0353623	0.0074056	0.00496698	0.00810397	0.0216646	0.00533434	0.0105367	0.0410087	0.0457227	0.0807719	0.00155885	0.00388253	0.00279047	0.178557	0	0.222497	0.085033	0.012234	0.381593
0.154096	0.67098	0.163566	0.00564917	0.0981789	-0.000769103	0.00504814	0.00895279	0.156973	0.322842	0.0416483	0.00608306	0.00425836	0.0101211	0.0196454	0.00675602	0.00435683	0.0196106	0.0353622	0.0074056	0.0049419	0.00802623	0.0216646	0.00533434	0.0105374	0.0410083	0.0457225	0.0807719	0.00155885	0.00388253	0.0027463	0.178557	0	0.225109	0.0872174	0.0123834	0.380578
0.152183	0.670903	0.164379	0.00442233	0.0998738	-0.000820979	0.00490708	0.00918059	0.155195	0.324865	0.0415443	0.00599489	0.00425797	0.0101211	0.0196457	0.00675574	0.00435683	0.0196073	0.035362	0.0074056	0.00491544	0.0079442	0.0216646	0.00533434	0.0105382	0.041008	0.0457223	0.0807719	0.00155885	0.00388253	0.00269969	0.178557	0	0.228733	0.0898414	0.0125885	0.379361
0.154164	0.670848	0.165012	0.00360853	0.101162	-0.00085773	0.00480848	0.00935467	0.154008	0.326354	0.0414705	0.0059319	0.0042577	0.0101211	0.0196459	0.00675553	0.00435683	0.0196049	0.0353619	0.0074056	0.00489654	0.00788558	0.0216646	0.00533434	0.0105388	0.0410077	0.0457221	0.0807719	0.00155885	0.00388253	0.00266639	0.178557	0	0.226546	0.0902535	0.0124734	0.379045
0.155504	0.670789	0.165691	0.00273423	0.102562	-0.000896996	0.00470311	0.00954123	0.152734	0.327951	0.0413918	0.00586457	0.00425741	0.0101211	0.0196462	0.00675532	0.00435683	0.0196023	0.0353618	0.0074056	0.00487633	0.00782294	0.0216646	0.00533434	0.0105393	0.0410074	0.0457219	0.0807719	0.00155885	0.00388253	0.0026308	0.178557	0	0.225288	0.0911287	0.0124092	0.378548
0.157605	0.670734	0.166346	0.00193806	0.103918	-0.000933501	0.00460563	0.00971991	0.151571	0.329462	0.0413185	0.00580177	0.00425714	0.0101211	0.0196464	0.00675511	0.00435683	0.0195999	0.0353616	0.0074056	0.00485749	0.00776451	0.0216646	0.00533434	0.0105399	0.0410072	0.0457217	0.0807719	0.00155885	0.00388253	0.0025976	0.178557	0	0.222915	0.0916492	0.0122833	0.378204
0.15844	0.670672	0.167078	0.00102781	0.105455	-0.000974651	0.00449553	0.00992	0.150245	0.331164	0.041236	0.00573104	0.00425683	0.0101211	0.0196466	0.00675488	0.00435683	0.0195972	0.0353615	0.0074056	0.00483626	0.0076987	0.0216646	0.00533434	0.0105405	0.0410069	0.0457216	0.0807719	0.00155885	0.00388253	0.00256021	0.178557	0	0.222314	0.093002	0.0122547	0.377536
0.160715	0.670618	0.167753	0.000254657	0.106876	-0.00101069	0.00439977	0.0101027	0.149115	0.332691	0.0411637	0.00566878	0.00425656	0.0101211	0.0196468	0.00675468	0.00435683	0.0195948	0.0353614	0.0074056	0.00481758	0.00764078	0.0216646	0.00533434	0.0105411	0.0410066	0.0457214	0.0807719	0.00155885	0.00388253	0.0025273	0.178557	0	0.219677	0.0936083	0.0121136	0.377176
0.160399	0.67055	0.168573	-0.000741582	0.108627	-0.00105579	0.00427931	0.0103256	0.147664	0.33458	0.0410732	0.00559113	0.00425623	0.0101211	0.0196471	0.00675443	0.00435683	0.0195918	0.0353612	0.0074056	0.00479427	0.00756852	0.0216646	0.00533434	0.0105417	0.0410063	0.0457212	0.0807719	0.00155885	0.00388253	0.00248624	0.178557	0	0.220572	0.0958396	0.012167	0.376107
0.16066	0.670485	0.169379	-0.00167633	0.110361	-0.00109879	0.00416494	0.0105438	0.146301	0.336411	0.0409869	0.00551686	0.0042559	0.0101211	0.0196473	0.00675419	0.00435683	0.019589	0.0353611	0.0074056	0.00477199	0.00749943	0.0216646	0.00533434	0.0105424	0.041006	0.045721	0.0807719	0.00155885	0.00388253	0.00244698	0.178557	0	0.220734	0.0978921	0.0121797	0.375106
0.163126	0.670431	0.170088	-0.0024155	0.111893	-0.00113419	0.0040717	0.0107334	0.145219	0.337968	0.0409158	0.00545533	0.00425564	0.0101211	0.0196475	0.00675399	0.00435683	0.0195866	0.0353609	0.0074056	0.00475352	0.00744217	0.0216646	0.00533434	0.0105429	0.0410058	0.0457208	0.0807719	0.00155885	0.00388253	0.00241446	0.178557	0	0.218073	0.0987957	0.0120362	0.374582
0.160921	0.670354	0.171055	-0.00353753	0.114006	-0.00118543	0.00393539	0.0109947	0.143585	0.340163	0.040813	0.0053668	0.00425525	0.0101211	0.0196478	0.0067537	0.00435683	0.0195832	0.0353608	0.0074056	0.00472695	0.0073598	0.0216646	0.00533434	0.0105437	0.0410054	0.0457206	0.0807719	0.00155885	0.00388253	0.00236765	0.178557	0	0.22192	0.10278	0.0122517	0.372857
0.165701	0.670311	0.171674	-0.0040768	0.115367	-0.00121307	0.00386379	0.0111569	0.142792	0.341454	0.0407575	0.00531817	0.00425504	0.0101211	0.019648	0.00675354	0.00435683	0.0195814	0.0353607	0.0074056	0.00471236	0.00731456	0.0216646	0.00533434	0.0105441	0.0410052	0.0457204	0.0807719	0.00155885	0.00388253	0.00234195	0.178557	0	0.216465	0.101967	0.0119543	0.372789
0.165669	0.670245	0.172559	-0.00499954	0.11733	-0.00125673	0.00374876	0.011393	0.141445	0.343397	0.0406698	0.0052422	0.00425471	0.0101211	0.0196483	0.0067533	0.00435683	0.0195785	0.0353605	0.0074056	0.00468956	0.00724387	0.0216646	0.00533434	0.0105448	0.0410049	0.0457202	0.0807719	0.00155885	0.00388253	0.00230178	0.178557	0	0.217582	0.103879	0.0120201	0.371496
0.164724	0.670174	0.17351	-0.00598266	0.119458	-0.00130327	0.00362627	0.0116466	0.14001	0.34548	0.0405764	0.00516115	0.00425436	0.0101211	0.0196485	0.00675303	0.00435683	0.0195754	0.0353604	0.0074056	0.00466524	0.00716846	0.0216646	0.00533434	0.0105455	0.0410046	0.04572	0.0807719	0.00155885	0.00388253	0.00225894	0.178557	0	0.220074	0.106461	0.012162	0.369915
0.164677	0.670108	0.174433	-0.00688548	0.121539	-0.00134678	0.00351234	0.0118909	0.138691	0.347468	0.040489	0.00508509	0.00425403	0.0101211	0.0196488	0.00675279	0.00435683	0.0195725	0.0353602	0.0074056	0.00464241	0.00709769	0.0216646	0.00533434	0.0105462	0.0410043	0.0457198	0.0807719	0.00155885	0.00388253	0.00221873	0.178557	0	0.221547	0.108563	0.0122474	0.368487
0.167685	0.670056	0.175207	-0.00755009	0.123308	-0.00138039	0.00342543	0.0120929	0.137717	0.349075	0.0404215	0.0050258	0.00425378	0.0101211	0.019649	0.0067526	0.00435683	0.0195702	0.0353601	0.0074056	0.00462462	0.00704253	0.0216646	0.00533434	0.0105467	0.041004	0.0457196	0.0807719	0.00155885	0.00388253	0.00218739	0.178557	0	0.219125	0.108741	0.0121175	0.367761
0.170471	0.670003	0.17601	-0.00823342	0.125162	-0.00141494	0.00333618	0.0123025	0.136715	0.35074	0.0403521	0.00496478	0.00425351	0.0101211	0.0196492	0.0067524	0.00435683	0.0195679	0.03536	0.0074056	0.00460631	0.00698575	0.0216646	0.00533434	0.0105472	0.0410038	0.0457195	0.0807719	0.00155885	0.00388253	0.00215513	0.178557	0	0.217235	0.109146	0.0120168	0.366912
0.170601	0.669937	0.176974	-0.00909917	0.127391	-0.00145763	0.00322532	0.012555	0.13545	0.352765	0.0402663	0.00488966	0.00425319	0.0101211	0.0196494	0.00675215	0.00435683	0.019565	0.0353598	0.0074056	0.00458377	0.00691586	0.0216646	0.00533434	0.0105479	0.0410035	0.0457193	0.0807719	0.00155885	0.00388253	0.00211542	0.178557	0	0.218922	0.111339	0.0121138	0.365354
0.169743	0.669867	0.177994	-0.0100319	0.129748	-0.00150331	0.00310649	0.0128228	0.134087	0.35492	0.0401746	0.00480937	0.00425284	0.0101211	0.0196497	0.00675189	0.00435683	0.0195619	0.0353597	0.0074056	0.00455967	0.00684115	0.0216646	0.00533434	0.0105486	0.0410032	0.045719	0.0807719	0.00155885	0.00388253	0.00207297	0.178557	0	0.221983	0.114257	0.0122869	0.363532
0.177103	0.669833	0.178483	-0.0104597	0.130816	-0.00152531	0.00304948	0.0129513	0.133457	0.355943	0.0401304	0.00477068	0.00425267	0.0101211	0.0196498	0.00675177	0.00435683	0.0195604	0.0353596	0.0074056	0.00454806	0.00680516	0.0216646	0.00533434	0.0105489	0.041003	0.0457189	0.0807719	0.00155885	0.00388253	0.00205252	0.178557	0	0.214606	0.111784	0.0118821	0.363916
0.175108	0.669759	0.179464	-0.0115038	0.132966	-0.00157456	0.00291949	0.0132137	0.131932	0.35811	0.0400315	0.00468513	0.0042523	0.0101211	0.0196501	0.00675149	0.00435683	0.0195572	0.0353594	0.0074056	0.00452239	0.00672556	0.0216646	0.00533434	0.0105497	0.0410027	0.0457187	0.0807719	0.00155885	0.00388253	0.0020073	0.178557	0	0.218885	0.115372	0.0121227	0.36207
0.173417	0.669685	0.180439	-0.0125231	0.135104	-0.001623	0.00279184	0.0134742	0.130443	0.360253	0.0399343	0.00460089	0.00425193	0.0101211	0.0196504	0.00675122	0.00435683	0.0195539	0.0353593	0.0074056	0.00449711	0.00664718	0.0216646	0.00533434	0.0105504	0.0410023	0.0457185	0.0807719	0.00155885	0.00388253	0.00196276	0.178557	0	0.222835	0.118847	0.012345	0.360269
0.173597	0.66962	0.181321	-0.0134145	0.137034	-0.00166598	0.00267894	0.013709	0.129139	0.362172	0.039848	0.004526	0.00425161	0.0101211	0.0196507	0.00675097	0.00435683	0.0195511	0.0353591	0.0074056	0.00447464	0.0065775	0.0216646	0.00533434	0.0105511	0.041002	0.0457183	0.0807719	0.00155885	0.00388253	0.00192317	0.178557	0	0.224382	0.121084	0.0124344	0.358913
0.172534	0.669549	0.182279	-0.0143798	0.139137	-0.00171255	0.00255665	0.013964	0.127726	0.364255	0.0397545	0.00444482	0.00425126	0.0101211	0.0196509	0.00675071	0.00435683	0.019548	0.0353589	0.0074056	0.00445027	0.00650197	0.0216646	0.00533434	0.0105518	0.0410017	0.0457181	0.0807719	0.00155885	0.00388253	0.00188026	0.178557	0	0.227515	0.124216	0.0126116	0.357232
0.17697	0.669502	0.182943	-0.0149903	0.140587	-0.00174323	0.00247677	0.0141392	0.126829	0.365662	0.0396929	0.00439104	0.00425103	0.0101211	0.0196511	0.00675054	0.00435683	0.0195459	0.0353588	0.0074056	0.00443414	0.00645193	0.0216646	0.00533434	0.0105523	0.0410015	0.0457179	0.0807719	0.00155885	0.00388253	0.00185183	0.178557	0	0.223482	0.12344	0.0123916	0.35692
0.176252	0.669433	0.183896	-0.0159191	0.142682	-0.00178862	0.00235794	0.0143919	0.125469	0.367714	0.0396018	0.00431176	0.00425068	0.0101211	0.0196514	0.00675028	0.00435683	0.0195429	0.0353587	0.0074056	0.00441034	0.00637816	0.0216646	0.00533434	0.0105529	0.0410012	0.0457177	0.0807719	0.00155885	0.00388253	0.00180992	0.178557	0	0.226032	0.126299	0.0125365	0.355313
0.180103	0.669383	0.184612	-0.016567	0.144254	-0.00182133	0.0022729	0.0145805	0.124517	0.369225	0.0395361	0.00425435	0.00425043	0.0101211	0.0196516	0.00675009	0.00435683	0.0195407	0.0353586	0.0074056	0.00439311	0.00632475	0.0216646	0.00533434	0.0105535	0.0410009	0.0457175	0.0807719	0.00155885	0.00388253	0.00177957	0.178557	0	0.222767	0.125915	0.0123589	0.354816
0.180862	0.669319	0.185501	-0.017396	0.146214	-0.00186258	0.00216536	0.0148153	0.123301	0.371117	0.0394532	0.00418208	0.00425012	0.0101211	0.0196518	0.00674986	0.00435683	0.0195379	0.0353584	0.0074056	0.00437143	0.00625751	0.0216646	0.00533434	0.0105541	0.0410006	0.0457173	0.0807719	0.00155885	0.00388253	0.00174136	0.178557	0	0.223356	0.1277	0.0123949	0.353552
0.18089	0.669253	0.186438	-0.018261	0.14828	-0.00190575	0.00205293	0.0150623	0.122032	0.373103	0.0393665	0.00410641	0.00424979	0.0101211	0.0196521	0.00674961	0.00435683	0.019535	0.0353583	0.0074056	0.00434872	0.00618711	0.0216646	0.00533434	0.0105547	0.0410003	0.0457171	0.0807719	0.00155885	0.00388253	0.00170136	0.178557	0	0.224806	0.130002	0.0124788	0.352098
0.18153	0.66919	0.18735	-0.0190846	0.150297	-0.00194724	0.00194509	0.0153024	0.120822	0.375026	0.0392832	0.00403357	0.00424948	0.0101211	0.0196523	0.00674938	0.00435683	0.0195322	0.0353581	0.0074056	0.00432686	0.00611933	0.0216646	0.00533434	0.0105554	0.041	0.0457169	0.0807719	0.00155885	0.00388253	0.00166285	0.178557	0	0.225455	0.131864	0.0125182	0.350781
0.183861	0.669133	0.188182	-0.0198091	0.152141	-0.00198429	0.00184913	0.0155207	0.119757	0.376764	0.0392087	0.00396836	0.00424919	0.0101211	0.0196525	0.00674917	0.00435683	0.0195297	0.035358	0.0074056	0.00430729	0.00605865	0.0216646	0.00533434	0.010556	0.0409998	0.0457168	0.0807719	0.00155885	0.00388253	0.00162838	0.178557	0	0.223981	0.13249	0.0124397	0.349858
0.183103	0.669064	0.189185	-0.020698	0.154366	-0.00202935	0.00173224	0.0157841	0.118451	0.378868	0.0391182	0.00388914	0.00424885	0.0101211	0.0196528	0.00674891	0.00435683	0.0195267	0.0353578	0.0074056	0.00428352	0.00598495	0.0216646	0.00533434	0.0105567	0.0409994	0.0457165	0.0807719	0.00155885	0.00388253	0.00158651	0.178557	0	0.22626	0.13535	0.0125695	0.348178
0.184431	0.669003	0.190088	-0.0214669	0.156374	-0.00206897	0.00162985	0.0160203	0.11732	0.380742	0.0390386	0.00381931	0.00424855	0.0101211	0.019653	0.00674868	0.00435683	0.019524	0.0353577	0.0074056	0.00426256	0.00591997	0.0216646	0.00533434	0.0105573	0.0409992	0.0457164	0.0807719	0.00155885	0.00388253	0.00154959	0.178557	0	0.225933	0.136675	0.0125546	0.346988
0.188044	0.66895	0.190882	-0.0221127	0.158145	-0.00210291	0.00154254	0.0162272	0.116368	0.38237	0.0389704	0.0037593	0.00424829	0.0101211	0.0196532	0.00674849	0.00435683	0.0195218	0.0353576	0.0074056	0.00424455	0.00586414	0.0216646	0.00533434	0.0105578	0.0409989	0.0457162	0.0807719	0.00155885	0.00388253	0.00151786	0.178557	0	0.222831	0.13631	0.0123854	0.346324
0.189129	0.668888	0.191816	-0.0228866	0.160232	-0.00214321	0.00143868	0.016471	0.115229	0.384296	0.0388895	0.00368813	0.00424798	0.0101211	0.0196535	0.00674826	0.00435683	0.019519	0.0353574	0.0074056	0.0042232	0.00579792	0.0216646	0.00533434	0.0105584	0.0409986	0.045716	0.0807719	0.00155885	0.00388253	0.00148024	0.178557	0	0.222746	0.137778	0.0123838	0.345044
0.189759	0.668825	0.192782	-0.0236776	0.162395	-0.00218459	0.00133218	0.0167229	0.114064	0.386282	0.0388063	0.00361499	0.00424766	0.0101211	0.0196537	0.00674802	0.00435683	0.0195162	0.0353573	0.0074056	0.00420125	0.00572987	0.0216646	0.00533434	0.0105591	0.0409983	0.0457158	0.0807719	0.00155885	0.00388253	0.00144158	0.178557	0	0.223154	0.139564	0.0124096	0.343644
0.189757	0.668758	0.19379	-0.0244933	0.164658	-0.00222743	0.00122202	0.0169854	0.112862	0.388347	0.0387202	0.00353918	0.00424733	0.0101211	0.019654	0.00674777	0.00435683	0.0195133	0.0353572	0.0074056	0.0041785	0.00565934	0.0216646	0.00533434	0.0105597	0.040998	0.0457156	0.0807719	0.00155885	0.00388253	0.0014015	0.178557	0	0.224266	0.141812	0.0124745	0.342082
0.191638	0.668699	0.194712	-0.0252111	0.166734	-0.00226574	0.00112391	0.0172246	0.111804	0.390218	0.0386432	0.00347123	0.00424704	0.0101211	0.0196542	0.00674755	0.00435683	0.0195107	0.035357	0.0074056	0.0041581	0.00559611	0.0216646	0.00533434	0.0105603	0.0409977	0.0457154	0.0807719	0.00155885	0.00388253	0.00136558	0.178557	0	0.223123	0.142645	0.0124139	0.340944
0.193394	0.668639	0.195651	-0.0259309	0.168852	-0.00230438	0.0010251	0.0174678	0.110742	0.392116	0.0385656	0.00340261	0.00424674	0.0101211	0.0196544	0.00674733	0.00435683	0.0195081	0.0353569	0.0074056	0.00413751	0.00553227	0.0216646	0.00533434	0.0105609	0.0409975	0.0457152	0.0807719	0.00155885	0.00388253	0.0013293	0.178557	0	0.222105	0.143554	0.0123602	0.339758
0.193321	0.668573	0.196692	-0.0267302	0.171205	-0.00234723	0.000915518	0.0177376	0.109562	0.394222	0.0384795	0.00332651	0.00424641	0.0101211	0.0196547	0.00674708	0.00435683	0.0195052	0.0353567	0.0074056	0.00411468	0.00546147	0.0216646	0.00533434	0.0105616	0.0409972	0.045715	0.0807719	0.00155885	0.00388253	0.00128908	0.178557	0	0.223156	0.145812	0.0124216	0.338135
0.192668	0.668505	0.197773	-0.0275493	0.173655	-0.00239137	0.000802808	0.0180174	0.108354	0.396401	0.0383908	0.00324806	0.00424607	0.0101211	0.0196549	0.00674683	0.00435683	0.0195022	0.0353566	0.0074056	0.00409113	0.00538847	0.0216646	0.00533434	0.0105623	0.0409968	0.0457148	0.0807719	0.00155885	0.00388253	0.0012476	0.178557	0	0.224842	0.148517	0.0125184	0.336359
0.195508	0.668448	0.198686	-0.0282025	0.175736	-0.00242743	0.000711247	0.0182526	0.107388	0.398218	0.0383182	0.00318369	0.00424579	0.0101211	0.0196552	0.00674662	0.00435683	0.0194997	0.0353564	0.0074056	0.00407182	0.00532858	0.0216646	0.00533434	0.0105628	0.0409966	0.0457146	0.0807719	0.00155885	0.00388253	0.00121357	0.178557	0	0.222452	0.148534	0.0123881	0.335377
0.197838	0.66839	0.199637	-0.0288764	0.177907	-0.00246476	0.000616585	0.0184972	0.106391	0.400105	0.0382432	0.00311702	0.00424551	0.0101211	0.0196554	0.00674641	0.00435683	0.0194972	0.0353563	0.0074056	0.00405181	0.00526655	0.0216646	0.00533434	0.0105634	0.0409963	0.0457144	0.0807719	0.00155885	0.00388253	0.00117833	0.178557	0	0.220656	0.148931	0.0122909	0.334254
0.196075	0.668318	0.200804	-0.0297218	0.180573	-0.00251112	0.00049875	0.0187982	0.105142	0.402434	0.03815	0.00303433	0.00424515	0.0101211	0.0196557	0.00674614	0.00435683	0.019494	0.0353562	0.0074056	0.004027	0.00518961	0.0216646	0.00533434	0.0105641	0.040996	0.0457142	0.0807719	0.00155885	0.00388253	0.00113462	0.178557	0	0.223428	0.15243	0.012448	0.332179
0.200072	0.668266	0.201692	-0.0303139	0.182616	-0.00254476	0.000413981	0.0190255	0.104265	0.404173	0.0380824	0.00297398	0.00424489	0.0101211	0.0196559	0.00674594	0.00435683	0.0194917	0.035356	0.0074056	0.00400888	0.00513346	0.0216646	0.00533434	0.0105647	0.0409957	0.0457141	0.0807719	0.00155885	0.00388253	0.00110271	0.178557	0	0.219696	0.151497	0.0122428	0.331399
0.197926	0.668192	0.2029	-0.031159	0.18539	-0.00259174	0.000295005	0.019336	0.103015	0.406564	0.0379879	0.00288997	0.00424452	0.0101211	0.0196561	0.00674567	0.00435683	0.0194885	0.0353559	0.0074056	0.00398367	0.00505529	0.0216646	0.00533434	0.0105654	0.0409954	0.0457138	0.0807719	0.00155885	0.00388253	0.0010583	0.178557	0	0.222776	0.155268	0.012417	0.329205
0.204863	0.668149	0.203666	-0.0316271	0.187172	-0.00261935	0.000226071	0.0195307	0.10232	0.408036	0.0379323	0.0028401	0.00424431	0.0101211	0.0196563	0.00674551	0.00435683	0.0194866	0.0353558	0.0074056	0.00396871	0.0050089	0.0216646	0.00533434	0.0105658	0.0409952	0.0457137	0.0807719	0.00155885	0.00388253	0.00103194	0.178557	0	0.21586	0.152058	0.0120341	0.329032
0.205346	0.668084	0.204763	-0.0323513	0.18971	-0.00266059	0.000122283	0.0198113	0.101247	0.410179	0.0378494	0.00276604	0.00424399	0.0101211	0.0196566	0.00674527	0.00435683	0.0194838	0.0353556	0.0074056	0.00394648	0.00493999	0.0216646	0.00533434	0.0105665	0.0409949	0.0457135	0.0807719	0.00155885	0.00388253	0.000992788	0.178557	0	0.215922	0.153725	0.01204	0.327402
0.203792	0.668013	0.205971	-0.0331467	0.19251	-0.00270592	8.24647e-06	0.0201204	0.100069	0.41254	0.0377582	0.00268462	0.00424363	0.0101211	0.0196568	0.006745	0.00435683	0.0194806	0.0353555	0.0074056	0.00392205	0.00486423	0.0216646	0.00533434	0.0105672	0.0409946	0.0457133	0.0807719	0.00155885	0.00388253	0.000949741	0.178557	0	0.218085	0.156924	0.0121631	0.325308
0.203856	0.667948	0.207113	-0.0338722	0.195168	-0.00274787	-9.69031e-05	0.0204115	0.0989932	0.414752	0.0376739	0.00260905	0.0042433	0.0101211	0.0196571	0.00674476	0.00435683	0.0194777	0.0353553	0.0074056	0.00389937	0.00479392	0.0216646	0.00533434	0.0105679	0.0409943	0.0457131	0.0807719	0.00155885	0.00388253	0.000909794	0.178557	0	0.218534	0.159438	0.0121896	0.32352
0.205514	0.667887	0.208187	-0.0345303	0.197679	-0.00278652	-0.000193383	0.0206845	0.0980162	0.416817	0.0375961	0.00253925	0.004243	0.0101211	0.0196573	0.00674453	0.00435683	0.0194751	0.0353552	0.0074056	0.00387842	0.00472898	0.0216646	0.00533434	0.0105685	0.040994	0.0457129	0.0807719	0.00155885	0.00388253	0.000872895	0.178557	0	0.217261	0.160996	0.0121195	0.322062
0.202949	0.667813	0.209486	-0.0353403	0.200717	-0.0028337	-0.000311389	0.0210153	0.0968147	0.419326	0.0375012	0.00245413	0.00424263	0.0101211	0.0196576	0.00674426	0.00435683	0.0194718	0.035355	0.0074056	0.00385288	0.00464978	0.0216646	0.00533434	0.0105692	0.0409936	0.0457126	0.0807719	0.00155885	0.00388253	0.000827896	0.178557	0	0.220433	0.16581	0.0122973	0.319639
0.201086	0.667741	0.210767	-0.0361165	0.203722	-0.00287946	-0.000425467	0.0213406	0.0956623	0.421784	0.0374091	0.00237141	0.00424228	0.0101211	0.0196579	0.00674399	0.00435683	0.0194687	0.0353548	0.0074056	0.00382806	0.00457281	0.0216646	0.00533434	0.0105699	0.0409933	0.0457124	0.0807719	0.00155885	0.00388253	0.000784167	0.178557	0	0.222834	0.170038	0.0124323	0.317342
0.201534	0.667676	0.211939	-0.0367969	0.206489	-0.00292032	-0.000526859	0.0216374	0.0946509	0.424014	0.0373269	0.00229729	0.00424195	0.0101211	0.0196581	0.00674375	0.00435683	0.0194658	0.0353547	0.0074056	0.00380581	0.00450385	0.0216646	0.00533434	0.0105706	0.040993	0.0457122	0.0807719	0.00155885	0.00388253	0.000744983	0.178557	0	0.222623	0.172221	0.0124218	0.315564
0.203518	0.667617	0.213042	-0.0374134	0.209106	-0.00295795	-0.000619842	0.0219158	0.0937335	0.426097	0.0372512	0.00222882	0.00424166	0.0101211	0.0196583	0.00674353	0.00435683	0.0194632	0.0353546	0.0074056	0.00378527	0.00444014	0.0216646	0.00533434	0.0105712	0.0409927	0.045712	0.0807719	0.00155885	0.00388253	0.000708789	0.178557	0	0.220661	0.172944	0.0123136	0.314126
0.204025	0.667552	0.214235	-0.0380782	0.211942	-0.00299859	-0.000720186	0.0222171	0.0927442	0.42835	0.0371694	0.00215487	0.00424134	0.0101211	0.0196586	0.00674329	0.00435683	0.0194604	0.0353544	0.0074056	0.00376308	0.00437134	0.0216646	0.00533434	0.0105718	0.0409924	0.0457118	0.0807719	0.00155885	0.00388253	0.000669697	0.178557	0	0.220243	0.174763	0.0122918	0.312328

## Sheet: Xyl_De-stat
Table S2_Xyl_De-stat. Production of metabolites per carbohydrate consumed (mol/mol-carbs) and biomass yield (gDW/g-(fiber+mucin)) during De-stat experiment in xylan plus mucin medium. Metabolite abbreviations in the tab 'metabolite abbreviations'. Negative value indicate consumption of metabolite.
D	ace	but	etOH	for	isobut	isoval	lact	prop	suc	valer	ala	arg	asp	asn	cys	gln	glu	gly	his	ile	leu	lys	met	phe	pro	ser	thr	trp	tyr	val	muc	CH4	CO2	H2	H2S	Yxs
0.193293	0.613363	0.0516777	0.140563	0.146343	-0.000650999	0.0239194	0.0194224	0.125412	0.299029	-0.00111315	-0.00746016	0.00431709	0.0100204	0.0193785	0.00676494	0.00423008	-0.000382796	0.0344756	-0.00922563	0.00284414	0.00680738	0.0118487	0.00161108	0.0105746	0.0408999	0.0457323	0.080725	0.00155885	0.00381128	-0.000830089	0.178557	0	0.116353	0.0489202	0.00744711	0.42817
0.193599	0.614771	0.0530546	0.139342	0.146297	-0.000650999	0.0238007	0.0182877	0.128347	0.295424	-0.00140813	-0.00739611	0.00431689	0.0100211	0.0193794	0.00676511	0.00423084	-0.000253721	0.03448	-0.00911501	0.00285714	0.00684508	0.0119139	0.00162749	0.0105743	0.0408999	0.0457322	0.0807251	0.00155885	0.00381128	-0.000830089	0.178557	0	0.116177	0.0480508	0.00751219	0.429144
0.191681	0.616348	0.054597	0.137973	0.146245	-0.000650999	0.0236674	0.0170177	0.131637	0.291384	-0.00173727	-0.00732426	0.00431667	0.0100219	0.0193804	0.00676529	0.00423169	-0.000108935	0.034485	-0.00899093	0.00287172	0.00688738	0.0119871	0.00164589	0.010574	0.0408998	0.0457321	0.0807252	0.00155885	0.00381128	-0.000830089	0.178557	0	0.117371	0.0477446	0.0076651	0.430026
0.18988	0.617904	0.0561159	0.136619	0.146194	-0.000650999	0.0235334	0.0157759	0.134899	0.287394	-0.00205064	-0.0072527	0.00431645	0.0100226	0.0193814	0.00676548	0.00423253	3.52726e-05	0.0344899	-0.00886734	0.00288624	0.00692951	0.01206	0.00166422	0.0105737	0.0408998	0.0457321	0.0807253	0.00155885	0.00381128	-0.000830089	0.178557	0	0.11854	0.0474161	0.00781647	0.430879
0.189111	0.619363	0.0575344	0.135344	0.146146	-0.000650999	0.0234048	0.0146276	0.137975	0.283652	-0.00232916	-0.00718479	0.00431624	0.0100233	0.0193824	0.00676565	0.00423333	0.000172114	0.0344946	-0.00875006	0.00290002	0.00696949	0.0121291	0.00168162	0.0105733	0.0408998	0.045732	0.0807254	0.00155885	0.00381128	-0.000830089	0.178557	0	0.119102	0.046837	0.00792739	0.431715
0.187094	0.620914	0.0590408	0.133987	0.146094	-0.000650999	0.0232668	0.0134129	0.141252	0.279672	-0.00261919	-0.00711225	0.00431601	0.0100241	0.0193834	0.00676584	0.00423419	0.000318297	0.0344995	-0.00862478	0.00291475	0.00701219	0.012203	0.0017002	0.010573	0.0408998	0.0457319	0.0807255	0.00155885	0.00381128	-0.000830089	0.178557	0	0.120491	0.0465745	0.00809307	0.432482
0.184065	0.622541	0.0606184	0.13256	0.146039	-0.000650999	0.0231204	0.0121473	0.144701	0.275496	-0.00291505	-0.00703568	0.00431578	0.0100249	0.0193845	0.00676603	0.0042351	0.000472601	0.0345048	-0.00849254	0.00293029	0.00705727	0.012281	0.00171982	0.0105726	0.0408998	0.0457318	0.0807257	0.00155885	0.00381128	-0.000830089	0.178557	0	0.122606	0.0465741	0.00830812	0.433182
0.185786	0.623746	0.0617772	0.131491	0.145997	-0.000650999	0.0230052	0.0112428	0.147296	0.272395	-0.00310161	-0.00697712	0.00431559	0.0100255	0.0193853	0.00676618	0.00423579	0.000590615	0.0345088	-0.0083914	0.00294217	0.00709175	0.0123406	0.00173482	0.0105724	0.0408998	0.0457317	0.0807258	0.00155885	0.00381128	-0.000830089	0.178557	0	0.122764	0.0456919	0.00830425	0.433891
0.183189	0.625309	0.0632834	0.130112	0.145944	-0.000650999	0.022859	0.0100555	0.150641	0.26838	-0.00335824	-0.00690206	0.00431536	0.0100263	0.0193864	0.00676638	0.00423668	0.000741862	0.034514	-0.00826178	0.0029574	0.00713594	0.0124171	0.00175405	0.010572	0.0408997	0.0457316	0.0807259	0.00155885	0.00381128	-0.000830089	0.178557	0	0.125161	0.0457208	0.00850093	0.43449
0.182462	0.626696	0.0646144	0.128879	0.145895	-0.000650999	0.0227244	0.00902406	0.15364	0.264808	-0.00356347	-0.00683411	0.00431515	0.010027	0.0193874	0.00676655	0.00423748	0.000878792	0.0345187	-0.00814443	0.00297119	0.00717594	0.0124863	0.00177146	0.0105717	0.0408997	0.0457315	0.080726	0.00155885	0.00381128	-0.000830089	0.178557	0	0.125996	0.0452009	0.00861757	0.435202
0.182955	0.627965	0.0658245	0.127745	0.14585	-0.000650999	0.0225975	0.00810144	0.156406	0.26154	-0.00373142	-0.00677092	0.00431495	0.0100277	0.0193883	0.00676671	0.00423823	0.00100614	0.034523	-0.00803529	0.00298402	0.00721314	0.0125506	0.00178765	0.0105714	0.0408997	0.0457315	0.0807261	0.00155885	0.00381128	-0.000830089	0.178557	0	0.126015	0.0443902	0.00867722	0.435951
0.175859	0.629887	0.0676704	0.126039	0.145783	-0.000650999	0.0224122	0.00666663	0.160555	0.256593	-0.00402129	-0.00667708	0.00431466	0.0100286	0.0193896	0.00676696	0.00423933	0.00119524	0.0345295	-0.00787323	0.00300306	0.00726839	0.0126462	0.00181169	0.010571	0.0408997	0.0457314	0.0807263	0.00155885	0.00381128	-0.000830089	0.178557	0	0.131496	0.0454765	0.00911397	0.436293
0.180264	0.630773	0.0684991	0.12523	0.14575	-0.000650999	0.022313	0.00607548	0.16255	0.254301	-0.00408665	-0.00663006	0.00431452	0.0100291	0.0193903	0.00676708	0.00423989	0.00128999	0.0345327	-0.00779202	0.0030126	0.00729607	0.0126941	0.00182373	0.0105708	0.0408997	0.0457313	0.0807263	0.00155885	0.00381128	-0.000830089	0.178557	0	0.128692	0.0436885	0.0089761	0.437205
0.178985	0.632148	0.0698022	0.123989	0.145699	-0.000650999	0.022169	0.00510609	0.165588	0.25075	-0.00423799	-0.00655978	0.0043143	0.0100299	0.0193913	0.00676726	0.00424072	0.00143162	0.0345375	-0.00767065	0.00302687	0.00733744	0.0127656	0.00184174	0.0105704	0.0408996	0.0457312	0.0807265	0.00155885	0.00381128	-0.000830089	0.178557	0	0.130047	0.0433301	0.00912612	0.437799
0.175981	0.633661	0.071234	0.122624	0.145644	-0.000650999	0.0220097	0.00404462	0.168934	0.246845	-0.00439994	-0.00648225	0.00431406	0.0100307	0.0193924	0.00676746	0.00424164	0.00158787	0.0345428	-0.00753674	0.0030426	0.00738309	0.0128446	0.0018616	0.0105701	0.0408996	0.0457311	0.0807266	0.00155885	0.00381128	-0.000830089	0.178557	0	0.132732	0.0433985	0.00936969	0.438269
0.177158	0.634789	0.0722874	0.121591	0.145601	-0.000650999	0.0218823	0.00329779	0.171481	0.243926	-0.00447736	-0.00642205	0.00431387	0.0100313	0.0193932	0.00676761	0.00424235	0.00170918	0.034547	-0.00743277	0.00305482	0.00741853	0.0129059	0.00187702	0.0105698	0.0408996	0.045731	0.0807267	0.00155885	0.00381128	-0.000830089	0.178557	0	0.132335	0.0424538	0.00939508	0.438952
0.175631	0.636138	0.0735514	0.120359	0.14555	-0.000650999	0.0217316	0.00239372	0.174518	0.240433	-0.00457991	-0.00635054	0.00431365	0.0100321	0.0193942	0.00676779	0.00424319	0.00185328	0.0345519	-0.00730927	0.00306933	0.00746063	0.0129787	0.00189534	0.0105695	0.0408996	0.045731	0.0807268	0.00155885	0.00381128	-0.000830089	0.178557	0	0.133994	0.0421699	0.00956543	0.439456
0.173143	0.637588	0.074916	0.119041	0.145496	-0.000650999	0.0215737	0.00140219	0.177757	0.236684	-0.00470956	-0.00627477	0.00431341	0.0100328	0.0193953	0.00676799	0.00424409	0.00200598	0.0345571	-0.00717841	0.00308471	0.00750524	0.0130559	0.00191475	0.0105691	0.0408996	0.0457309	0.0807269	0.00155885	0.00381128	-0.000830089	0.178557	0	0.136449	0.0421206	0.0097928	0.439909
0.173525	0.638802	0.0760579	0.117938	0.145451	-0.000650999	0.0214414	0.000573247	0.18047	0.233545	-0.00481721	-0.0062113	0.00431322	0.0100335	0.0193962	0.00676815	0.00424484	0.00213386	0.0345615	-0.00706881	0.00309759	0.0075426	0.0131205	0.00193101	0.0105688	0.0408996	0.0457308	0.080727	0.00155885	0.00381128	-0.000830089	0.178557	0	0.13793	0.0418316	0.00982081	0.440373
0.171724	0.640204	0.0773776	0.116666	0.145399	-0.000650999	0.0212896	-0.000388778	0.183595	0.229923	-0.00494642	-0.00613832	0.00431299	0.0100343	0.0193972	0.00676834	0.0042457	0.00228094	0.0345665	-0.00694276	0.0031124	0.00758557	0.0131949	0.00194971	0.0105685	0.0408995	0.0457307	0.0807272	0.00155885	0.00381128	-0.000830089	0.178557	0	0.141013	0.0420338	0.00997487	0.440629
0.169743	0.641615	0.0787043	0.115382	0.145347	-0.000650999	0.0211351	-0.00134949	0.186753	0.226273	-0.00506848	-0.00606435	0.00431276	0.0100351	0.0193983	0.00676853	0.00424658	0.00243	0.0345716	-0.00681502	0.00312741	0.00762911	0.0132702	0.00196866	0.0105681	0.0408995	0.0457306	0.0807273	0.00155885	0.00381128	-0.000830089	0.178557	0	0.143424	0.0419443	0.0101766	0.440874
0.168542	0.642948	0.0799533	0.114165	0.145296	-0.000650999	0.0209865	-0.00224354	0.189752	0.222824	-0.00517074	-0.00599377	0.00431254	0.0100358	0.0193993	0.00676871	0.00424741	0.00257224	0.0345764	-0.00669312	0.00314174	0.00767066	0.0133421	0.00198674	0.0105678	0.0408995	0.0457305	0.0807274	0.00155885	0.00381128	-0.000830089	0.178557	0	0.145229	0.0416654	0.010335	0.44117
0.165996	0.6444	0.0813134	0.112839	0.145242	-0.000650999	0.0208244	-0.00321608	0.19302	0.219066	-0.00528078	-0.0059168	0.0043123	0.0100366	0.0194004	0.00676891	0.00424832	0.00272734	0.0345817	-0.00656019	0.00315736	0.00771598	0.0134205	0.00200646	0.0105674	0.0408995	0.0457304	0.0807275	0.00155885	0.00381128	-0.000830089	0.178557	0	0.148265	0.0417243	0.0105807	0.441332
0.164771	0.645721	0.0825457	0.111626	0.145191	-0.000650999	0.0206735	-0.00408409	0.196014	0.215644	-0.0053644	-0.00584585	0.00431208	0.0100373	0.0194014	0.00676909	0.00424916	0.00287032	0.0345866	-0.00643766	0.00317176	0.00775775	0.0134927	0.00202463	0.0105671	0.0408995	0.0457304	0.0807277	0.00155885	0.00381128	-0.000830089	0.178557	0	0.150195	0.0414565	0.0107472	0.441597
0.162507	0.647136	0.0838644	0.110327	0.145137	-0.000650999	0.0205114	-0.00501075	0.199223	0.211978	-0.00545119	-0.00576972	0.00431185	0.0100381	0.0194024	0.00676929	0.00425006	0.00302373	0.0345918	-0.00630618	0.00318721	0.00780256	0.0135702	0.00204414	0.0105667	0.0408994	0.0457303	0.0807278	0.00155885	0.00381128	-0.000830089	0.178557	0	0.153139	0.0414543	0.0109859	0.441748
0.164685	0.648114	0.0847653	0.109418	0.145098	-0.000650999	0.0203924	-0.00561662	0.201483	0.209438	-0.00547724	-0.0057152	0.00431168	0.0100387	0.0194032	0.00676943	0.0042507	0.00313359	0.0345956	-0.00621203	0.00319827	0.00783466	0.0136258	0.0020581	0.0105665	0.0408994	0.0457302	0.0807279	0.00155885	0.00381128	-0.000830089	0.178557	0	0.151967	0.04034	0.0109283	0.442315
0.162674	0.649486	0.0860384	0.108152	0.145045	-0.000650999	0.0202314	-0.00649616	0.204619	0.20588	-0.00554257	-0.00564031	0.00431145	0.0100395	0.0194043	0.00676962	0.00425159	0.00328452	0.0346007	-0.00608269	0.00321347	0.00787875	0.013702	0.00207729	0.0105661	0.0408994	0.0457301	0.080728	0.00155885	0.00381128	-0.000830089	0.178557	0	0.154722	0.040272	0.0111523	0.442468
0.161108	0.650809	0.0872623	0.106926	0.144993	-0.000650999	0.0200736	-0.00733184	0.207657	0.202446	-0.00559337	-0.00556741	0.00431122	0.0100403	0.0194053	0.00676981	0.00425245	0.00343142	0.0346057	-0.00595679	0.00322827	0.00792167	0.0137763	0.00209596	0.0105658	0.0408994	0.04573	0.0807281	0.00155885	0.00381128	-0.000830089	0.178557	0	0.157122	0.0400971	0.0113504	0.442641
0.161163	0.651967	0.0883269	0.105848	0.144947	-0.000650999	0.0199316	-0.00804331	0.210339	0.199438	-0.00561866	-0.00550257	0.00431102	0.0100409	0.0194062	0.00676997	0.00425322	0.00356208	0.0346102	-0.0058448	0.00324143	0.00795984	0.0138423	0.00211258	0.0105655	0.0408994	0.0457299	0.0807282	0.00155885	0.00381128	-0.000830089	0.178557	0	0.157977	0.0395232	0.0114361	0.442959
0.158465	0.653386	0.0896365	0.104529	0.144891	-0.000650999	0.0197599	-0.00892821	0.213614	0.195751	-0.00566157	-0.0054237	0.00431077	0.0100418	0.0194073	0.00677017	0.00425415	0.00372103	0.0346156	-0.00570858	0.00325743	0.00800627	0.0139226	0.00213278	0.0105651	0.0408994	0.0457298	0.0807284	0.00155885	0.00381128	-0.000830089	0.178557	0	0.161603	0.0396322	0.011722	0.44297
0.160209	0.654361	0.0905241	0.103611	0.144851	-0.000650999	0.0196346	-0.00949855	0.215907	0.193213	-0.00565472	-0.00536753	0.0043106	0.0100423	0.0194081	0.00677032	0.00425481	0.00383422	0.0346195	-0.00561158	0.00326883	0.00803934	0.0139798	0.00214717	0.0105649	0.0408993	0.0457298	0.0807285	0.00155885	0.00381128	-0.000830089	0.178557	0	0.160782	0.0386489	0.0116845	0.443455
0.15522	0.655996	0.0920305	0.10209	0.144786	-0.000650999	0.0194354	-0.0105107	0.219688	0.188965	-0.00569718	-0.00527628	0.00431032	0.0100433	0.0194094	0.00677055	0.00425589	0.0040181	0.0346257	-0.00545399	0.00328735	0.00809306	0.0140728	0.00217055	0.0105644	0.0408993	0.0457297	0.0807286	0.00155885	0.00381128	-0.000830089	0.178557	0	0.16693	0.0393272	0.0121531	0.443173
0.158297	0.656816	0.0927689	0.101308	0.144752	-0.000650999	0.0193244	-0.0109627	0.221652	0.186824	-0.00566398	-0.00522748	0.00431016	0.0100438	0.0194101	0.00677068	0.00425647	0.00411645	0.0346291	-0.0053697	0.00329726	0.00812179	0.0141225	0.00218305	0.0105642	0.0408993	0.0457296	0.0807287	0.00155885	0.00381128	-0.000830089	0.178557	0	0.164657	0.0380152	0.012008	0.443804
0.155053	0.658262	0.0940907	0.0999532	0.144693	-0.000650999	0.0191422	-0.0118263	0.22503	0.183064	-0.00567121	-0.00514515	0.00430991	0.0100447	0.0194113	0.00677089	0.00425744	0.00428236	0.0346347	-0.00522752	0.00331397	0.00817026	0.0142063	0.00220414	0.0105638	0.0408993	0.0457295	0.0807288	0.00155885	0.00381128	-0.000830089	0.178557	0	0.169106	0.0382572	0.0123524	0.44369
0.153293	0.659554	0.0952662	0.0987347	0.14464	-0.000650999	0.0189751	-0.0125777	0.228077	0.179697	-0.00565726	-0.00507039	0.00430968	0.0100455	0.0194124	0.00677108	0.00425832	0.00443302	0.0346399	-0.0050984	0.00332914	0.00821427	0.0142824	0.00222329	0.0105635	0.0408993	0.0457294	0.0807289	0.00155885	0.00381128	-0.000830089	0.178557	0	0.172074	0.0381421	0.0125883	0.443729
0.154512	0.660533	0.0961475	0.0978004	0.144599	-0.000650999	0.0188421	-0.0131154	0.230425	0.177139	-0.0056155	-0.00501197	0.0043095	0.0100461	0.0194132	0.00677123	0.00425901	0.00455073	0.0346439	-0.00499752	0.00334099	0.00824866	0.0143419	0.00223826	0.0105632	0.0408992	0.0457293	0.080729	0.00155885	0.00381128	-0.000830089	0.178557	0	0.171746	0.0372966	0.0125824	0.444128
0.150666	0.662026	0.0975038	0.0963912	0.144537	-0.000650999	0.0186481	-0.0139782	0.23395	0.17325	-0.00559441	-0.00492534	0.00430923	0.010047	0.0194144	0.00677146	0.00426004	0.00472531	0.0346499	-0.0048479	0.00335857	0.00829967	0.0144302	0.00226045	0.0105628	0.0408992	0.0457292	0.0807292	0.00155885	0.00381128	-0.000830089	0.178557	0	0.177197	0.0376955	0.0129993	0.443873
0.152458	0.662927	0.0983074	0.0955243	0.144498	-0.000650999	0.0185213	-0.0144502	0.236136	0.170893	-0.00553393	-0.00487038	0.00430906	0.0100476	0.0194152	0.0067716	0.00426069	0.00483606	0.0346536	-0.00475299	0.00336973	0.00833202	0.0144861	0.00227453	0.0105626	0.0408992	0.0457292	0.0807293	0.00155885	0.00381128	-0.000830089	0.178557	0	0.176179	0.036711	0.0129411	0.444337
0.14755	0.664523	0.0997527	0.094012	0.144432	-0.000650999	0.0183105	-0.0153565	0.239925	0.166731	-0.00549539	-0.00477685	0.00430877	0.0100485	0.0194165	0.00677184	0.00426179	0.00502454	0.0346601	-0.00459146	0.00338871	0.00838708	0.0145814	0.00229849	0.0105621	0.0408992	0.0457291	0.0807294	0.00155885	0.00381128	-0.000830089	0.178557	0	0.183151	0.0373777	0.0134693	0.44389
0.149391	0.665396	0.100526	0.0931661	0.144393	-0.000650999	0.018184	-0.0157958	0.242065	0.164444	-0.00541913	-0.00472261	0.0043086	0.0100491	0.0194173	0.00677198	0.00426243	0.00513384	0.0346638	-0.00449779	0.00339972	0.00841901	0.0146366	0.00231239	0.0105619	0.0408992	0.045729	0.0807295	0.00155885	0.00381128	-0.000830089	0.178557	0	0.182002	0.0363746	0.0133999	0.444357
0.148525	0.66655	0.101556	0.092057	0.144344	-0.000650999	0.0180223	-0.0164038	0.244862	0.161426	-0.00534511	-0.00465241	0.00430838	0.0100498	0.0194183	0.00677216	0.00426326	0.0052753	0.0346686	-0.00437655	0.00341396	0.00846034	0.0147081	0.00233037	0.0105615	0.0408992	0.0457289	0.0807296	0.00155885	0.00381128	-0.000830089	0.178557	0	0.184188	0.0360459	0.0135751	0.444438
0.146259	0.667846	0.102715	0.0908119	0.144288	-0.000650999	0.0178412	-0.0170901	0.247999	0.158036	-0.00526496	-0.00457371	0.00430814	0.0100507	0.0194194	0.00677236	0.00426419	0.0054339	0.034674	-0.00424063	0.00342994	0.00850667	0.0147883	0.00235053	0.0105612	0.0408991	0.0457288	0.0807298	0.00155885	0.00381128	-0.000830089	0.178557	0	0.188194	0.0360602	0.0138839	0.444301
0.146447	0.668871	0.103621	0.0898168	0.144243	-0.000650999	0.0176916	-0.0176011	0.250519	0.155349	-0.00517051	-0.00450974	0.00430794	0.0100513	0.0194203	0.00677252	0.00426495	0.00556282	0.0346784	-0.00413014	0.00344292	0.00854434	0.0148534	0.00236692	0.0105609	0.0408991	0.0457287	0.0807299	0.00155885	0.00381128	-0.000830089	0.178557	0	0.189114	0.0354751	0.0139645	0.444513
0.144778	0.670089	0.104702	0.0886383	0.144189	-0.000650999	0.0175163	-0.0182198	0.253498	0.152159	-0.0050697	-0.00443437	0.0043077	0.0100521	0.0194214	0.00677272	0.00426584	0.0057147	0.0346836	-0.00399998	0.00345822	0.00858871	0.0149302	0.00238623	0.0105605	0.0408991	0.0457287	0.08073	0.00155885	0.00381128	-0.000830089	0.178557	0	0.192478	0.0353438	0.0142251	0.444434
0.144972	0.671097	0.105588	0.0876535	0.144144	-0.000650999	0.0173656	-0.018704	0.255998	0.149514	-0.00495893	-0.00437046	0.0043075	0.0100528	0.0194223	0.00677288	0.0042666	0.00584349	0.034688	-0.0038896	0.00347119	0.00862633	0.0149953	0.0024026	0.0105602	0.0408991	0.0457286	0.0807301	0.00155885	0.00381128	-0.000830089	0.178557	0	0.193413	0.0347614	0.0143054	0.444631
0.144471	0.672147	0.106501	0.0866177	0.144096	-0.000650999	0.0172025	-0.0191779	0.258639	0.146752	-0.00481377	-0.00430223	0.00430729	0.0100535	0.0194232	0.00677306	0.0042674	0.00598099	0.0346927	-0.00377176	0.00348503	0.0086665	0.0150647	0.00242008	0.0105599	0.0408991	0.0457285	0.0807302	0.00155885	0.00381128	-0.000830089	0.178557	0	0.195285	0.0343485	0.0144544	0.444693
0.141577	0.673422	0.107608	0.0853552	0.144037	-0.000650999	0.0170021	-0.0197423	0.261861	0.143395	-0.00462608	-0.00421868	0.00430703	0.0100544	0.0194244	0.00677327	0.00426839	0.00614935	0.0346984	-0.00362748	0.00350199	0.00871569	0.0151498	0.00244149	0.0105595	0.040899	0.0457284	0.0807304	0.00155885	0.00381128	-0.000830089	0.178557	0	0.200505	0.0345093	0.0148508	0.444331
0.144236	0.67408	0.10815	0.0846731	0.144003	-0.000650999	0.0168803	-0.0199408	0.263634	0.141645	-0.00443865	-0.00417052	0.00430688	0.0100549	0.0194251	0.00677339	0.00426896	0.0062464	0.0347017	-0.00354431	0.00351176	0.00874404	0.0151989	0.00245382	0.0105593	0.040899	0.0457283	0.0807304	0.00155885	0.00381128	-0.000830089	0.178557	0	0.198848	0.0340112	0.0145608	0.44475
0.142552	0.675196	0.109102	0.0835524	0.143949	-0.000650999	0.0166951	-0.0203849	0.266512	0.138699	-0.00422597	-0.00409474	0.00430665	0.0100557	0.0194262	0.00677359	0.00426986	0.00639911	0.0347069	-0.00341343	0.00352714	0.00878865	0.015276	0.00247324	0.0105589	0.040899	0.0457282	0.0807306	0.00155885	0.00381128	-0.000830089	0.178557	0	0.20265	0.0342266	0.0147611	0.444528
0.138709	0.67654	0.110254	0.0822078	0.143885	-0.000650999	0.0164751	-0.0209349	0.26996	0.135154	-0.00398476	-0.00400431	0.00430637	0.0100566	0.0194275	0.00677382	0.00427092	0.00658134	0.0347132	-0.00325725	0.0035455	0.00884189	0.0153681	0.0024964	0.0105585	0.040899	0.0457281	0.0807307	0.00155885	0.00381128	-0.000830089	0.178557	0	0.209601	0.0347117	0.0152555	0.443918
0.140101	0.677293	0.110872	0.0814225	0.143846	-0.000650999	0.0163333	-0.0211515	0.272006	0.133147	-0.00375926	-0.00394853	0.0043062	0.0100572	0.0194282	0.00677396	0.00427158	0.00669376	0.034717	-0.00316091	0.00355682	0.00887473	0.015425	0.00251069	0.0105583	0.040899	0.0457281	0.0807308	0.00155885	0.00381128	-0.000830089	0.178557	0	0.208839	0.0339105	0.0151876	0.444228
0.137709	0.678453	0.111848	0.0802423	0.143788	-0.000650999	0.0161318	-0.0215677	0.275052	0.130076	-0.00349369	-0.00386726	0.00430594	0.0100581	0.0194294	0.00677417	0.00427254	0.00685752	0.0347226	-0.00302056	0.00357331	0.00892257	0.0155077	0.00253151	0.0105579	0.0408989	0.045728	0.080731	0.00155885	0.00381128	-0.000830089	0.178557	0	0.213807	0.0340376	0.0155356	0.443832
0.139812	0.679107	0.11237	0.0795459	0.143753	-0.000650999	0.0159996	-0.0217098	0.276882	0.128327	-0.0032533	-0.00381637	0.00430579	0.0100586	0.0194301	0.0067743	0.00427315	0.00696008	0.0347261	-0.00293267	0.00358364	0.00895253	0.0155595	0.00254455	0.0105576	0.0408989	0.0457279	0.080731	0.00155885	0.00381128	-0.000830089	0.178557	0	0.211907	0.0330727	0.0153839	0.444266
0.134485	0.680567	0.113601	0.0780616	0.143681	-0.000650999	0.015747	-0.0222398	0.280711	0.124461	-0.00292467	-0.00371436	0.00430547	0.0100597	0.0194316	0.00677457	0.00427435	0.00716565	0.0347331	-0.00275649	0.00360434	0.00901259	0.0156634	0.00257068	0.0105572	0.0408989	0.0457278	0.0807312	0.00155885	0.00381128	-0.000830089	0.178557	0	0.221664	0.0339141	0.0160775	0.443256
0.13551	0.681307	0.114191	0.0772722	0.14364	-0.000650999	0.0155968	-0.0223971	0.282786	0.122481	-0.00264909	-0.00365657	0.00430529	0.0100603	0.0194324	0.00677471	0.00427503	0.00728211	0.0347371	-0.00265668	0.00361607	0.00904661	0.0157223	0.00258549	0.0105569	0.0408989	0.0457277	0.0807313	0.00155885	0.00381128	-0.000830089	0.178557	0	0.221335	0.0331946	0.0160383	0.443479
0.133968	0.682324	0.115019	0.0762073	0.143586	-0.000650999	0.0154021	-0.0226722	0.285566	0.119771	-0.00232824	-0.00358039	0.00430505	0.0100611	0.0194335	0.00677491	0.00427593	0.00743562	0.0347423	-0.00252512	0.00363153	0.00909146	0.0157999	0.00260501	0.0105565	0.0408989	0.0457276	0.0807314	0.00155885	0.00381128	-0.000830089	0.178557	0	0.225241	0.0331106	0.0163053	0.443166
0.13244	0.683327	0.11583	0.0751493	0.143532	-0.000650999	0.0152058	-0.0229227	0.288334	0.117092	-0.00199102	-0.00350406	0.00430482	0.0100619	0.0194345	0.00677511	0.00427684	0.00758945	0.0347475	-0.00239329	0.00364702	0.0091364	0.0158776	0.00262456	0.0105562	0.0408989	0.0457275	0.0807316	0.00155885	0.00381128	-0.000830089	0.178557	0	0.229207	0.0330233	0.0165756	0.442834
0.130479	0.684369	0.116669	0.0740469	0.143476	-0.000650999	0.0149996	-0.0231711	0.291223	0.114309	-0.00162942	-0.00342416	0.00430457	0.0100627	0.0194357	0.00677531	0.00427778	0.00775045	0.034753	-0.00225531	0.00366324	0.00918344	0.015959	0.00264503	0.0105558	0.0408988	0.0457274	0.0807317	0.00155885	0.00381128	-0.000830089	0.178557	0	0.234033	0.0330456	0.0169071	0.442381
0.131987	0.685	0.117148	0.0733466	0.143438	-0.000650999	0.0148554	-0.0232249	0.29309	0.112604	-0.00131554	-0.00337045	0.0043044	0.0100633	0.0194364	0.00677545	0.00427842	0.00785869	0.0347567	-0.00216254	0.00367414	0.00921506	0.0160137	0.00265879	0.0105556	0.0408988	0.0457274	0.0807318	0.00155885	0.00381128	-0.000830089	0.178557	0	0.232718	0.0322016	0.0167942	0.442693
0.126705	0.686404	0.118285	0.0718698	0.143363	-0.000650999	0.0145827	-0.0235851	0.296952	0.108859	-0.000853325	-0.0032642	0.00430407	0.0100644	0.0194379	0.00677572	0.00427967	0.0080728	0.034764	-0.00197905	0.0036957	0.00927761	0.0161219	0.00268601	0.0105551	0.0408988	0.0457272	0.080732	0.00155885	0.00381128	-0.000830089	0.178557	0	0.243827	0.0330602	0.0175767	0.441416
0.128068	0.687017	0.118739	0.0711774	0.143325	-0.000650999	0.0144353	-0.0236006	0.29881	0.107196	-0.000512505	-0.00321002	0.0043039	0.0100649	0.0194387	0.00677586	0.00428031	0.00818198	0.0347678	-0.00188548	0.0037067	0.0093095	0.016177	0.00269989	0.0105548	0.0408988	0.0457272	0.080732	0.00155885	0.00381128	-0.000830089	0.178557	0	0.242616	0.032232	0.0174699	0.441697
0.128467	0.687735	0.119278	0.0703756	0.143282	-0.000650999	0.0142681	-0.0236457	0.300952	0.105255	-0.000139834	-0.00314806	0.00430371	0.0100656	0.0194396	0.00677602	0.00428104	0.00830684	0.034772	-0.00177847	0.00371927	0.00934598	0.0162401	0.00271576	0.0105545	0.0408988	0.0457271	0.0807322	0.00155885	0.00381128	-0.000830089	0.178557	0	0.243231	0.0316587	0.0174942	0.441737
0.123338	0.68909	0.120351	0.0689208	0.143206	-0.000650999	0.0139878	-0.0239089	0.304784	0.101621	0.000389636	-0.00304079	0.00430338	0.0100667	0.0194411	0.0067763	0.00428231	0.00852301	0.0347794	-0.00159321	0.00374104	0.00940913	0.0163494	0.00274324	0.010554	0.0408987	0.045727	0.0807323	0.00155885	0.00381128	-0.000830089	0.178557	0	0.25429	0.0328988	0.0181762	0.440299
0.122646	0.689907	0.120962	0.068005	0.143156	-0.000650999	0.0137955	-0.02395	0.307235	0.0994092	0.000823762	-0.00296972	0.00430316	0.0100675	0.0194421	0.00677648	0.00428315	0.00866624	0.0347843	-0.00147046	0.00375547	0.00945098	0.0164218	0.00276145	0.0105537	0.0408987	0.0457269	0.0807324	0.00155885	0.00381128	-0.000830089	0.178557	0	0.255441	0.0331849	0.0181219	0.440134
0.124325	0.690441	0.121337	0.0673798	0.143121	-0.000650999	0.013654	-0.0238985	0.308933	0.0979479	0.00118446	-0.00291894	0.004303	0.010068	0.0194428	0.00677661	0.00428375	0.00876856	0.0347878	-0.00138277	0.00376577	0.00948087	0.0164735	0.00277446	0.0105535	0.0408987	0.0457268	0.0807325	0.00155885	0.00381128	-0.000830089	0.178557	0	0.253195	0.0323337	0.0179248	0.440413
0.123146	0.691355	0.122045	0.0663815	0.143068	-0.000650999	0.0134548	-0.0240249	0.311579	0.0954875	0.00159154	-0.00284379	0.00430277	0.0100688	0.0194439	0.0067768	0.00428464	0.00891999	0.0347929	-0.00125299	0.00378102	0.00952511	0.01655	0.00279371	0.0105531	0.0408987	0.0457267	0.0807327	0.00155885	0.00381128	-0.000830089	0.178557	0	0.25682	0.0322381	0.0181429	0.439941
0.120833	0.692404	0.122861	0.065242	0.143008	-0.000650999	0.0132293	-0.0241843	0.314595	0.0926696	0.00204419	-0.00275843	0.0043025	0.0100697	0.0194451	0.00677702	0.00428565	0.00909201	0.0347988	-0.00110557	0.00379834	0.00957536	0.0166369	0.00281558	0.0105527	0.0408987	0.0457266	0.0807328	0.00155885	0.00381128	-0.000830089	0.178557	0	0.262944	0.0324443	0.0185357	0.439122
0.119407	0.693339	0.123579	0.0642141	0.142953	-0.000650999	0.0130214	-0.024293	0.317326	0.0901493	0.00248076	-0.00268045	0.00430226	0.0100705	0.0194462	0.00677722	0.00428657	0.00924917	0.0348042	-0.000970881	0.00381417	0.00962127	0.0167164	0.00283555	0.0105523	0.0408986	0.0457265	0.0807329	0.00155885	0.00381128	-0.000830089	0.178557	0	0.26729	0.0324179	0.0188014	0.438533
0.117789	0.694292	0.124307	0.0631629	0.142897	-0.000650999	0.0128072	-0.024392	0.320123	0.0875793	0.00293706	-0.00260035	0.00430201	0.0100713	0.0194473	0.00677743	0.00428752	0.00941058	0.0348097	-0.000832548	0.00383043	0.00966843	0.0167979	0.00285607	0.010552	0.0408986	0.0457264	0.0807331	0.00155885	0.00381128	-0.000830089	0.178557	0	0.272167	0.0324456	0.0191028	0.437859
0.116177	0.695238	0.125024	0.0621135	0.14284	-0.000650999	0.0125912	-0.0244737	0.322921	0.0850239	0.00340654	-0.00251989	0.00430176	0.0100722	0.0194485	0.00677763	0.00428847	0.00957272	0.0348152	-0.000693595	0.00384676	0.0097158	0.0168799	0.00287669	0.0105516	0.0408986	0.0457263	0.0807332	0.00155885	0.00381128	-0.000830089	0.178557	0	0.277148	0.0324746	0.0194097	0.437158
0.114363	0.696205	0.125754	0.0610368	0.142782	-0.000650999	0.012368	-0.024545	0.325795	0.0824099	0.00389829	-0.00243699	0.0043015	0.010073	0.0194496	0.00677785	0.00428945	0.00973977	0.0348209	-0.000550428	0.00386358	0.0097646	0.0169643	0.00289792	0.0105512	0.0408986	0.0457262	0.0807333	0.00155885	0.00381128	-0.000830089	0.178557	0	0.282749	0.0325637	0.0197581	0.43636
0.113975	0.696976	0.126321	0.0601601	0.142734	-0.000650999	0.0121796	-0.0245507	0.328151	0.080313	0.00434105	-0.002368	0.00430129	0.0100738	0.0194506	0.00677802	0.00429026	0.0098788	0.0348256	-0.000431274	0.00387758	0.00980522	0.0170346	0.0029156	0.0105509	0.0408986	0.0457262	0.0807335	0.00155885	0.00381128	-0.000830089	0.178557	0	0.284902	0.0322493	0.0198641	0.436028
0.115017	0.697554	0.126728	0.0594848	0.142695	-0.000650999	0.0120272	-0.024498	0.329984	0.0787327	0.0047283	-0.00231323	0.00430112	0.0100743	0.0194514	0.00677817	0.00429091	0.00998916	0.0348294	-0.000336693	0.0038887	0.00983746	0.0170903	0.00292963	0.0105506	0.0408985	0.0457261	0.0807335	0.00155885	0.00381128	-0.000830089	0.178557	0	0.283479	0.0315376	0.0197205	0.436184
0.110342	0.698879	0.127731	0.0580124	0.142616	-0.000650999	0.0117233	-0.0246053	0.333911	0.0751519	0.00539288	-0.00220015	0.00430077	0.0100755	0.019453	0.00677846	0.00429225	0.0102171	0.0348372	-0.000141382	0.00391165	0.00990403	0.0172055	0.0029586	0.0105501	0.0408985	0.045726	0.0807337	0.00155885	0.00381128	-0.000830089	0.178557	0	0.296677	0.0324388	0.0205919	0.434291
0.110827	0.699506	0.128168	0.0572769	0.142574	-0.000650999	0.0115559	-0.0245373	0.335911	0.0734371	0.00582324	-0.00214019	0.00430058	0.0100761	0.0194539	0.00677861	0.00429296	0.0103379	0.0348413	-3.78438e-05	0.00392381	0.00993933	0.0172666	0.00297396	0.0105498	0.0408985	0.0457259	0.0807338	0.00155885	0.00381128	-0.000830089	0.178557	0	0.296539	0.0318657	0.0205354	0.434248
0.109918	0.700314	0.128747	0.0563432	0.142521	-0.000650999	0.0113492	-0.0244956	0.338435	0.0712331	0.00633346	-0.00206536	0.00430035	0.0100769	0.0194549	0.0067788	0.00429384	0.0104887	0.0348464	9.13981e-05	0.003939	0.00998339	0.0173428	0.00299313	0.0105495	0.0408985	0.0457258	0.080734	0.00155885	0.00381128	-0.000830089	0.178557	0	0.300138	0.0316967	0.020737	0.433637
0.109618	0.70103	0.129249	0.055503	0.142473	-0.000650999	0.0111586	-0.0244221	0.340718	0.0692718	0.00682168	-0.001997	0.00430014	0.0100776	0.0194559	0.00677898	0.00429465	0.0106264	0.0348511	0.000209457	0.00395288	0.0100236	0.0174124	0.00301064	0.0105492	0.0408985	0.0457257	0.0807341	0.00155885	0.00381128	-0.000830089	0.178557	0	0.302086	0.0313518	0.0208234	0.433239
0.109141	0.701762	0.12976	0.0546419	0.142424	-0.000650999	0.0109621	-0.0243383	0.34306	0.0672665	0.00732889	-0.00192669	0.00429992	0.0100784	0.0194569	0.00677916	0.00429548	0.0107681	0.034856	0.000330883	0.00396714	0.010065	0.017484	0.00302865	0.0105488	0.0408984	0.0457256	0.0807342	0.00155885	0.00381128	-0.000830089	0.178557	0	0.304513	0.0310574	0.020942	0.432762
0.107452	0.702651	0.130389	0.0536048	0.142365	-0.000650999	0.0107291	-0.0242655	0.345872	0.0648346	0.00791704	-0.00184282	0.00429966	0.0100793	0.0194581	0.00677937	0.00429647	0.0109371	0.0348617	0.000475735	0.00398417	0.0101144	0.0175694	0.00305014	0.0105484	0.0408984	0.0457255	0.0807343	0.00155885	0.00381128	-0.000830089	0.178557	0	0.3104	0.0311095	0.0212969	0.431775
0.106112	0.703487	0.13097	0.052621	0.142309	-0.000650999	0.0105042	-0.0241662	0.348548	0.062546	0.00849939	-0.0017624	0.00429941	0.0100801	0.0194592	0.00677958	0.00429742	0.0110992	0.0348672	0.000614627	0.00400049	0.0101617	0.0176513	0.00307074	0.0105481	0.0408984	0.0457254	0.0807345	0.00155885	0.00381128	-0.000830089	0.178557	0	0.315408	0.031063	0.0215896	0.430903
0.104122	0.704408	0.131612	0.0515363	0.142247	-0.000650999	0.0102567	-0.0240603	0.351499	0.0600205	0.00913866	-0.00167382	0.00429914	0.010081	0.0194605	0.00677981	0.00429847	0.0112777	0.0348733	0.000767596	0.00401846	0.0102139	0.0177415	0.00309343	0.0105477	0.0408984	0.0457253	0.0807346	0.00155885	0.00381128	-0.000830089	0.178557	0	0.322518	0.031211	0.0220241	0.429712
0.105621	0.704824	0.131861	0.0510018	0.142214	-0.000650999	0.010118	-0.0238771	0.352993	0.0588557	0.00955959	-0.00162646	0.00429899	0.0100815	0.0194611	0.00677993	0.00429903	0.0113731	0.0348766	0.000849398	0.00402808	0.0102418	0.0177897	0.00310557	0.0105474	0.0408984	0.0457253	0.0807347	0.00155885	0.00381128	-0.000830089	0.178557	0	0.318979	0.0303309	0.0217307	0.430063
0.103369	0.705763	0.132506	0.0498857	0.142149	-0.000650999	0.00985954	-0.0237383	0.356037	0.0562753	0.0102414	-0.00153448	0.0042987	0.0100825	0.0194624	0.00678017	0.00430012	0.0115585	0.0348829	0.00100825	0.00404674	0.0102959	0.0178834	0.00312913	0.010547	0.0408983	0.0457252	0.0807348	0.00155885	0.00381128	-0.000830089	0.178557	0	0.326961	0.0305472	0.0222212	0.428721
0.101802	0.706601	0.133067	0.0488755	0.14209	-0.000650999	0.00961997	-0.0235687	0.358807	0.0539663	0.0108942	-0.00144997	0.00429844	0.0100834	0.0194636	0.00678038	0.00430111	0.0117288	0.0348887	0.0011542	0.00406389	0.0103457	0.0179695	0.00315078	0.0105466	0.0408983	0.0457251	0.080735	0.00155885	0.00381128	-0.000830089	0.178557	0	0.333013	0.0305683	0.0225781	0.427649
0.101884	0.707189	0.133435	0.0481371	0.142045	-0.000650999	0.00943447	-0.0233632	0.360856	0.0523282	0.0114373	-0.00138588	0.00429824	0.010084	0.0194645	0.00678055	0.00430187	0.0118579	0.0348931	0.00126488	0.0040769	0.0103834	0.0180348	0.0031672	0.0105463	0.0408983	0.045725	0.0807351	0.00155885	0.00381128	-0.000830089	0.178557	0	0.333732	0.0300971	0.0225723	0.427349
0.0996076	0.708116	0.134052	0.047014	0.141979	-0.000650999	0.00916643	-0.0231611	0.363939	0.0497696	0.0121739	-0.00129155	0.00429795	0.010085	0.0194659	0.00678079	0.00430299	0.012048	0.0348996	0.00142779	0.00409604	0.0104389	0.0181308	0.00319136	0.0105459	0.0408983	0.0457249	0.0807352	0.00155885	0.00381128	-0.000830089	0.178557	0	0.342337	0.0303303	0.0230981	0.425874
0.0993882	0.708729	0.134429	0.0462369	0.141931	-0.000650999	0.00896871	-0.0229252	0.366102	0.0480576	0.0127613	-0.00122355	0.00429774	0.0100857	0.0194668	0.00678096	0.00430379	0.0121851	0.0349043	0.00154524	0.00410985	0.010479	0.0182001	0.00320879	0.0105456	0.0408983	0.0457248	0.0807354	0.00155885	0.00381128	-0.000830089	0.178557	0	0.344041	0.029944	0.0231564	0.425408
0.0990849	0.709346	0.134805	0.0454507	0.141883	-0.000650999	0.0087672	-0.0226751	0.368294	0.0463324	0.0133649	-0.00115442	0.00429752	0.0100865	0.0194678	0.00678114	0.00430461	0.0123244	0.034909	0.00166462	0.00412388	0.0105197	0.0182705	0.00322649	0.0105452	0.0408982	0.0457247	0.0807355	0.00155885	0.00381128	-0.000830089	0.178557	0	0.346012	0.0295831	0.0232319	0.424893
0.095508	0.710456	0.135535	0.0440975	0.141803	-0.000650999	0.00844117	-0.0224075	0.372016	0.0432643	0.0142719	-0.00104008	0.00429717	0.0100877	0.0194694	0.00678144	0.00430596	0.0125548	0.0349169	0.00186209	0.00414708	0.010587	0.0183869	0.00325579	0.0105447	0.0408982	0.0457246	0.0807357	0.00155885	0.00381128	-0.000830089	0.178557	0	0.359887	0.0302238	0.0241041	0.422592
0.0970939	0.71076	0.135672	0.0436561	0.141773	-0.000650999	0.00830995	-0.0221252	0.37329	0.042382	0.0147256	-0.000997238	0.00429704	0.0100881	0.01947	0.00678155	0.00430647	0.0126411	0.0349198	0.00193609	0.00415578	0.0106122	0.0184305	0.00326676	0.0105445	0.0408982	0.0457245	0.0807357	0.00155885	0.00381128	-0.000830089	0.178557	0	0.354875	0.0292728	0.0237095	0.423096
0.0970763	0.711307	0.135981	0.0429345	0.141727	-0.000650999	0.00811641	-0.0218282	0.375323	0.0408397	0.0153341	-0.000931878	0.00429683	0.0100888	0.019471	0.00678171	0.00430724	0.0127728	0.0349243	0.00204896	0.00416904	0.0106507	0.0184971	0.00328351	0.0105442	0.0408982	0.0457244	0.0807358	0.00155885	0.00381128	-0.000830089	0.178557	0	0.35577	0.0288229	0.0237102	0.42271
0.0936058	0.712376	0.13666	0.0416019	0.141647	-0.000650999	0.00778523	-0.0214853	0.379012	0.0378665	0.0162915	-0.000817023	0.00429648	0.01009	0.0194726	0.00678201	0.0043086	0.0130043	0.0349322	0.00224732	0.00419235	0.0107183	0.0186141	0.00331293	0.0105437	0.0408982	0.0457243	0.080736	0.00155885	0.00381128	-0.000830089	0.178557	0	0.369783	0.0294217	0.0245826	0.420341
0.0948758	0.7127	0.1368	0.041127	0.141615	-0.000650999	0.00764227	-0.0211676	0.380388	0.0369258	0.0167909	-0.00077053	0.00429633	0.0100905	0.0194733	0.00678213	0.00430915	0.013098	0.0349354	0.00232762	0.00420179	0.0107457	0.0186614	0.00332484	0.0105434	0.0408981	0.0457242	0.0807361	0.00155885	0.00381128	-0.000830089	0.178557	0	0.365607	0.0285666	0.024244	0.420697
0.0928306	0.713494	0.137247	0.0400762	0.141548	-0.000650999	0.00735964	-0.020729	0.383349	0.0346834	0.0176821	-0.000675172	0.00429604	0.0100915	0.0194746	0.00678237	0.00431027	0.0132902	0.034942	0.00249231	0.00422114	0.0108018	0.0187585	0.00334927	0.010543	0.0408981	0.0457241	0.0807363	0.00155885	0.00381128	-0.000830089	0.178557	0	0.374414	0.0287269	0.0247654	0.419041
0.0935502	0.713807	0.137331	0.0395592	0.14151	-0.000650999	0.00718735	-0.0202522	0.384886	0.0337391	0.0183316	-0.000620847	0.00429587	0.010092	0.0194754	0.00678251	0.00431091	0.0133996	0.0349457	0.00258613	0.00423216	0.0108338	0.0188139	0.00336319	0.0105427	0.0408981	0.0457241	0.0807364	0.00155885	0.00381128	-0.000830089	0.178557	0	0.369444	0.0285732	0.0242771	0.419399
0.0928143	0.714334	0.137557	0.0387829	0.141457	-0.000650999	0.00695297	-0.0197275	0.387136	0.0322045	0.0191523	-0.000544692	0.00429563	0.0100928	0.0194765	0.00678271	0.00431181	0.0135531	0.0349509	0.00271765	0.00424762	0.0108786	0.0188914	0.0033827	0.0105424	0.0408981	0.045724	0.0807365	0.00155885	0.00381128	-0.000830089	0.178557	0	0.370796	0.0287214	0.0242336	0.418788
0.0885772	0.715404	0.138139	0.0373437	0.141365	-0.000650999	0.00655855	-0.0190691	0.39121	0.0291686	0.0204194	-0.000412456	0.00429522	0.0100942	0.0194783	0.00678305	0.00431338	0.0138196	0.03496	0.00294603	0.00427446	0.0109565	0.0190261	0.00341657	0.0105418	0.040898	0.0457238	0.0807367	0.00155885	0.00381128	-0.000830089	0.178557	0	0.388758	0.0296905	0.0253268	0.415624
0.0878142	0.715909	0.138328	0.0365698	0.141311	-0.000650999	0.00631603	-0.0184764	0.393474	0.0276812	0.0212938	-0.000334564	0.00429498	0.010095	0.0194794	0.00678325	0.0043143	0.0139765	0.0349654	0.00308055	0.00429026	0.0110023	0.0191054	0.00343653	0.0105414	0.040898	0.0457237	0.0807368	0.00155885	0.00381128	-0.000830089	0.178557	0	0.392321	0.0295428	0.0254771	0.414645
0.0923346	0.71558	0.137964	0.0368096	0.141316	-0.000650999	0.00631651	-0.0180742	0.392952	0.0284985	0.0214969	-0.000342053	0.004295	0.010095	0.0194793	0.00678323	0.00431421	0.0139614	0.0349649	0.00306762	0.00428874	0.0109979	0.0190978	0.00343461	0.0105414	0.040898	0.0457237	0.0807368	0.00155885	0.00381128	-0.000830089	0.178557	0	0.373255	0.0277137	0.0241609	0.417155
0.0882327	0.716567	0.138453	0.035429	0.141225	-0.000650999	0.00592096	-0.0173078	0.396902	0.025668	0.0228214	-0.000211365	0.0042946	0.0100963	0.0194812	0.00678356	0.00431575	0.0142248	0.0349739	0.00329332	0.00431527	0.0110749	0.0192309	0.00346809	0.0105408	0.040898	0.0457236	0.080737	0.00155885	0.00381128	-0.000830089	0.178557	0	0.390717	0.0286044	0.0252092	0.413995
0.0866067	0.71717	0.138679	0.0345059	0.141161	-0.000650999	0.00563205	-0.0166037	0.399601	0.0238921	0.0238622	-0.000118537	0.00429431	0.0100973	0.0194825	0.0067838	0.00431685	0.0144119	0.0349802	0.00345364	0.00433411	0.0111295	0.0193254	0.00349187	0.0105404	0.040898	0.0457234	0.0807372	0.00155885	0.00381128	-0.000830089	0.178557	0	0.398123	0.028739	0.0256032	0.412372
0.0830357	0.718088	0.139089	0.0331711	0.14107	-0.000650999	0.00523422	-0.0157419	0.403457	0.0212291	0.0252406	1.12478e-05	0.00429391	0.0100987	0.0194843	0.00678414	0.00431839	0.0146734	0.0349892	0.00367778	0.00436045	0.0112059	0.0194576	0.00352512	0.0105398	0.0408979	0.0457233	0.0807374	0.00155885	0.00381128	-0.000830089	0.178557	0	0.413324	0.0297621	0.0264617	0.409478
0.0829341	0.718415	0.139118	0.0325686	0.141024	-0.000650999	0.00501672	-0.0150553	0.405288	0.0202082	0.0261035	7.82857e-05	0.0042937	0.0100994	0.0194853	0.00678431	0.00431918	0.0148085	0.0349938	0.00379356	0.00437405	0.0112454	0.0195259	0.00354229	0.0105395	0.0408979	0.0457232	0.0807375	0.00155885	0.00381128	-0.000830089	0.178557	0	0.412656	0.0295009	0.026313	0.409049
0.0825051	0.718785	0.139166	0.0319025	0.140973	-0.000650999	0.00478	-0.0143257	0.407305	0.0190614	0.0270337	0.000151567	0.00429347	0.0101001	0.0194863	0.0067845	0.00432004	0.0149562	0.0349988	0.00392012	0.00438892	0.0112885	0.0196005	0.00356107	0.0105391	0.0408979	0.0457231	0.0807377	0.00155885	0.00381128	-0.000830089	0.178557	0	0.414496	0.0292675	0.0263371	0.4082
0.0833431	0.718936	0.139078	0.0315125	0.140939	-0.000650999	0.00461297	-0.0136754	0.408554	0.0185257	0.0277588	0.000200812	0.00429332	0.0101006	0.019487	0.00678462	0.00432063	0.0150554	0.0350022	0.00400517	0.00439892	0.0113175	0.0196506	0.00357368	0.0105389	0.0408979	0.0457231	0.0807377	0.00155885	0.00381128	-0.000830089	0.178557	0	0.409986	0.028593	0.0259579	0.408353
0.0806958	0.719645	0.139304	0.0303831	0.140858	-0.000650999	0.0042469	-0.012715	0.411887	0.0164132	0.0291122	0.000317192	0.00429296	0.0101019	0.0194887	0.00678492	0.004322	0.0152899	0.0350102	0.00420616	0.00442254	0.011386	0.0197692	0.0036035	0.0105384	0.0408979	0.0457229	0.0807379	0.00155885	0.00381128	-0.000830089	0.178557	0	0.423039	0.0291409	0.0266883	0.405671
0.0771665	0.720511	0.139598	0.0290233	0.140761	-0.000650999	0.00381152	-0.0116011	0.415887	0.0138437	0.0307073	0.000456121	0.00429253	0.0101033	0.0194906	0.00678528	0.00432364	0.0155699	0.0350197	0.00444609	0.00445073	0.0114678	0.0199106	0.00363909	0.0105377	0.0408978	0.0457228	0.0807382	0.00155885	0.00381128	-0.000830089	0.178557	0	0.441927	0.0300686	0.0277791	0.402015
0.0807796	0.720139	0.139198	0.0293054	0.140769	-0.000650999	0.00381908	-0.011183	0.415257	0.0147716	0.0309016	0.000445751	0.00429256	0.0101032	0.0194905	0.00678525	0.00432352	0.015549	0.035019	0.00442818	0.00444863	0.0114617	0.0199001	0.00363643	0.0105378	0.0408978	0.0457228	0.0807381	0.00155885	0.00381128	-0.000830089	0.178557	0	0.421679	0.0283392	0.0264096	0.404674
0.076353	0.721114	0.139517	0.0277611	0.140658	-0.000650999	0.003321	-0.00988923	0.419809	0.0118712	0.0327364	0.000604335	0.00429207	0.0101049	0.0194927	0.00678566	0.00432539	0.0158686	0.0350299	0.00470207	0.00448081	0.0115551	0.0200616	0.00367706	0.010537	0.0408978	0.0457226	0.0807384	0.00155885	0.00381128	-0.000830089	0.178557	0	0.445569	0.0295778	0.0278032	0.400147
0.0745057	0.721653	0.139583	0.0267871	0.140584	-0.000650999	0.00297373	-0.0088134	0.42276	0.0101998	0.0341038	0.000711742	0.00429173	0.010106	0.0194942	0.00678594	0.00432666	0.016085	0.0350373	0.00488756	0.00450261	0.0116183	0.020171	0.00370457	0.0105365	0.0408978	0.0457224	0.0807386	0.00155885	0.00381128	-0.000830089	0.178557	0	0.446736	0.0304468	0.0277041	0.399123
0.0772906	0.721372	0.139226	0.0269391	0.140583	-0.000650999	0.00294318	-0.00831657	0.422504	0.0108648	0.0344282	0.000713877	0.00429173	0.010106	0.0194943	0.00678594	0.00432669	0.0160893	0.0350374	0.00489125	0.00450304	0.0116196	0.0201731	0.00370512	0.0105365	0.0408978	0.0457224	0.0807386	0.00155885	0.00381128	-0.000830089	0.178557	0	0.425616	0.0291595	0.0262692	0.40184
0.0733302	0.722238	0.139424	0.0254744	0.140474	-0.000650999	0.00244517	-0.00688886	0.426883	0.00823575	0.0363308	0.000869996	0.00429124	0.0101077	0.0194965	0.00678634	0.00432853	0.0164039	0.0350482	0.00516087	0.00453473	0.0117115	0.0203321	0.00374512	0.0105358	0.0408977	0.0457223	0.0807388	0.00155885	0.00381128	-0.000830089	0.178557	0	0.446677	0.0303342	0.0274618	0.397635
0.072501	0.722553	0.139337	0.0247661	0.140415	-0.000650999	0.0021598	-0.00584897	0.429108	0.00717693	0.0375336	0.000955424	0.00429098	0.0101086	0.0194977	0.00678656	0.00432954	0.0165761	0.0350541	0.00530841	0.00455206	0.0117618	0.0204191	0.003767	0.0105354	0.0408977	0.0457222	0.080739	0.00155885	0.00381128	-0.000830089	0.178557	0	0.449786	0.0302805	0.0275434	0.396376
0.0716183	0.722927	0.139312	0.0240126	0.140354	-0.000650999	0.00187247	-0.00487023	0.431436	0.00597301	0.0387099	0.00104268	0.0042907	0.0101095	0.0194989	0.00678679	0.00433058	0.0167519	0.03506	0.00545911	0.00456977	0.0118131	0.020508	0.00378935	0.010535	0.0408977	0.045722	0.0807391	0.00155885	0.00381128	-0.000830089	0.178557	0	0.453252	0.0302527	0.0276437	0.395106
0.0711389	0.723277	0.139312	0.0233333	0.140301	-0.000650999	0.00161923	-0.00403329	0.43352	0.00486006	0.0397337	0.00112005	0.00429046	0.0101103	0.0195	0.00678698	0.00433149	0.0169078	0.0350654	0.00559273	0.00458548	0.0118587	0.0205868	0.00380918	0.0105346	0.0408976	0.045722	0.0807393	0.00155885	0.00381128	-0.000830089	0.178557	0	0.454161	0.0300577	0.0275853	0.394316
0.0706489	0.723616	0.139298	0.0226574	0.140247	-0.000650999	0.00136353	-0.00317125	0.435604	0.00377057	0.040776	0.00119786	0.00429022	0.0101111	0.0195011	0.00678718	0.00433241	0.0170647	0.0350707	0.00572711	0.00460127	0.0119045	0.020666	0.00382911	0.0105343	0.0408976	0.0457219	0.0807394	0.00155885	0.00381128	-0.000830089	0.178557	0	0.455097	0.0298699	0.0275261	0.393504
0.0665648	0.724619	0.139542	0.0209765	0.140123	-0.000650999	0.000796255	-0.00156595	0.440619	0.000733348	0.0429326	0.00137608	0.00428967	0.010113	0.0195037	0.00678764	0.00433452	0.0174238	0.035083	0.0060349	0.00463744	0.0120094	0.0208475	0.00387477	0.0105334	0.0408976	0.0457216	0.0807397	0.00155885	0.00381128	-0.000830089	0.178557	0	0.480613	0.031288	0.0289447	0.388514
0.0686891	0.724434	0.139288	0.0210575	0.14012	-0.000650999	0.000764403	-0.00117906	0.44052	0.00116196	0.0432043	0.00138069	0.00428966	0.010113	0.0195037	0.00678765	0.00433457	0.0174331	0.0350833	0.00604287	0.00463837	0.0120121	0.0208522	0.00387595	0.0105334	0.0408976	0.0457216	0.0807397	0.00155885	0.00381128	-0.000830089	0.178557	0	0.463363	0.0299251	0.0277835	0.39074
0.0646457	0.725419	0.13948	0.0193536	0.139992	-0.000650999	0.000175698	0.000555363	0.445637	-0.00185172	0.045477	0.0015644	0.00428909	0.0101149	0.0195063	0.00678813	0.00433674	0.0178033	0.0350959	0.00636013	0.00467565	0.0121203	0.0210393	0.00392301	0.0105326	0.0408975	0.0457214	0.08074	0.00155885	0.00381128	-0.000830089	0.178557	0	0.489748	0.0313837	0.0292338	0.385024
0.0632085	0.725899	0.139454	0.0183924	0.139915	-0.000650999	-0.000189119	0.00179061	0.448602	-0.00339535	0.0469669	0.00167532	0.00428874	0.0101161	0.0195079	0.00678841	0.00433805	0.0180268	0.0351035	0.0065517	0.00469817	0.0121856	0.0211523	0.00395142	0.010532	0.0408975	0.0457213	0.0807402	0.00155885	0.00381128	-0.000830089	0.178557	0	0.498167	0.0316823	0.0295996	0.382241
0.0628403	0.726144	0.139326	0.0177761	0.139862	-0.000650999	-0.000450229	0.00279576	0.450569	-0.00425577	0.0480946	0.00175251	0.0042885	0.0101169	0.019509	0.00678861	0.00433897	0.0181824	0.0351088	0.00668501	0.00471383	0.012231	0.0212309	0.0039712	0.0105317	0.0408975	0.0457212	0.0807403	0.00155885	0.00381128	-0.000830089	0.178557	0	0.498294	0.0314589	0.0294675	0.381023
0.0636706	0.726132	0.1391	0.01755	0.139836	-0.000650999	-0.00058985	0.0035083	0.451397	-0.00436239	0.0487865	0.0017906	0.00428838	0.0101173	0.0195095	0.00678871	0.00433942	0.0182591	0.0351115	0.00675079	0.00472156	0.0122535	0.0212697	0.00398096	0.0105315	0.0408975	0.0457211	0.0807404	0.00155885	0.00381128	-0.000830089	0.178557	0	0.48898	0.0306533	0.0287767	0.381656
0.0601631	0.727	0.139144	0.0159111	0.139708	-0.000650999	-0.0011905	0.00544656	0.456401	-0.0070967	0.0511909	0.00197496	0.00428781	0.0101192	0.0195121	0.00678918	0.00434159	0.0186306	0.0351241	0.00706919	0.00475898	0.012362	0.0214574	0.00402819	0.0105306	0.0408974	0.0457209	0.0807407	0.00155885	0.00381128	-0.000830089	0.178557	0	0.514443	0.0320313	0.0301247	0.375395
0.0605331	0.72704	0.138905	0.0155699	0.139672	-0.000650999	-0.00137611	0.00632518	0.457589	-0.00737699	0.0520759	0.00202685	0.00428765	0.0101198	0.0195129	0.00678931	0.00434221	0.0187352	0.0351277	0.0071588	0.00476951	0.0123925	0.0215103	0.00404148	0.0105304	0.0408974	0.0457209	0.0807408	0.00155885	0.00381128	-0.000830089	0.178557	0	0.508208	0.0314387	0.0296074	0.37538
0.0591888	0.727432	0.138754	0.0146423	0.139593	-0.000650999	-0.00175926	0.00776099	0.460526	-0.00871865	0.0537109	0.00214083	0.0042873	0.010121	0.0195145	0.00678961	0.00434356	0.0189649	0.0351355	0.00735565	0.00479264	0.0124596	0.0216264	0.00407068	0.0105299	0.0408974	0.0457207	0.080741	0.00155885	0.00381128	-0.000830089	0.178557	0	0.516525	0.0317574	0.0299335	0.372464
0.0570392	0.727991	0.138619	0.0134076	0.139491	-0.000650999	-0.00225277	0.00954261	0.464395	-0.0105834	0.0557824	0.00228887	0.00428684	0.0101225	0.0195166	0.00678999	0.0043453	0.0192632	0.0351457	0.00761132	0.00482268	0.0125468	0.0217771	0.0041086	0.0105292	0.0408973	0.0457205	0.0807412	0.00155885	0.00381128	-0.000830089	0.178557	0	0.532575	0.0325552	0.0306963	0.367987
0.0583126	0.727779	0.138273	0.0134392	0.13948	-0.000650999	-0.00232556	0.0101672	0.464502	-0.010128	0.0562716	0.00230412	0.00428679	0.0101227	0.0195168	0.00679003	0.00434549	0.019294	0.0351467	0.00763767	0.00482578	0.0125558	0.0217927	0.00411251	0.0105291	0.0408973	0.0457205	0.0807412	0.00155885	0.00381128	-0.000830089	0.178557	0	0.517537	0.0314654	0.0296628	0.36967
0.0565316	0.728217	0.13806	0.0123524	0.139387	-0.000650999	-0.00278316	0.0119175	0.467964	-0.0116585	0.0582423	0.0024396	0.00428637	0.0101241	0.0195187	0.00679037	0.00434709	0.019567	0.0351561	0.00787164	0.00485328	0.0126355	0.0219306	0.00414722	0.0105285	0.0408973	0.0457204	0.0807415	0.00155885	0.00381128	-0.000830089	0.178557	0	0.530256	0.0320782	0.0302166	0.3658
0.0546132	0.728679	0.137816	0.0111873	0.139286	-0.000650999	-0.00327732	0.0138221	0.471684	-0.0132821	0.0603777	0.00258564	0.00428592	0.0101256	0.0195208	0.00679075	0.00434881	0.0198613	0.0351661	0.00812386	0.00488291	0.0127215	0.0220794	0.00418463	0.0105278	0.0408973	0.0457202	0.0807417	0.00155885	0.00381128	-0.000830089	0.178557	0	0.545102	0.0328267	0.0308775	0.361475
0.0563269	0.728315	0.137409	0.0114471	0.139291	-0.000650999	-0.00327983	0.0142814	0.471126	-0.0123827	0.0606167	0.0025782	0.00428594	0.0101255	0.0195207	0.00679073	0.00434872	0.0198463	0.0351656	0.00811102	0.0048814	0.0127171	0.0220718	0.00418273	0.0105278	0.0408973	0.0457202	0.0807417	0.00155885	0.00381128	-0.000830089	0.178557	0	0.52478	0.0314743	0.0295432	0.364174
0.0527595	0.729103	0.137148	0.00962871	0.139138	-0.000650999	-0.00402203	0.0170262	0.476862	-0.0150551	0.0637654	0.00279966	0.00428525	0.0101279	0.0195238	0.0067913	0.00435134	0.0202925	0.0351808	0.00849347	0.00492635	0.0128475	0.0222973	0.00423946	0.0105268	0.0408972	0.0457199	0.0807421	0.00155885	0.00381128	-0.000830089	0.178557	0	0.556201	0.0332397	0.0311125	0.356452
0.0506336	0.729576	0.136792	0.00831792	0.139021	-0.000650999	-0.00459796	0.0193257	0.481095	-0.0167865	0.0662947	0.00296841	0.00428473	0.0101296	0.0195262	0.00679173	0.00435334	0.0206326	0.0351924	0.00878492	0.0049606	0.0129469	0.0224692	0.00428269	0.010526	0.0408972	0.0457197	0.0807423	0.00155885	0.00381128	-0.000830089	0.178557	0	0.575239	0.0342731	0.0319651	0.351181
0.0519592	0.729205	0.136339	0.00853911	0.139022	-0.000650999	-0.00462624	0.0199218	0.480684	-0.0158958	0.0666641	0.00296791	0.00428473	0.0101296	0.0195262	0.00679173	0.00435333	0.0206316	0.0351924	0.00878405	0.00496049	0.0129466	0.0224687	0.00428256	0.010526	0.0408972	0.0457197	0.0807423	0.00155885	0.00381128	-0.000830089	0.178557	0	0.556285	0.0330619	0.0307004	0.353536
0.0501974	0.729542	0.135903	0.00740463	0.138916	-0.000650999	-0.00515623	0.0221594	0.484423	-0.0172439	0.0690533	0.003121	0.00428425	0.0101312	0.0195284	0.00679212	0.00435514	0.0209401	0.0352029	0.00904844	0.00499156	0.0130367	0.0226246	0.00432178	0.0105253	0.0408971	0.0457195	0.0807426	0.00155885	0.00381128	-0.000830089	0.178557	0	0.571302	0.0338907	0.0313054	0.349002
0.0502673	0.729432	0.135425	0.00709326	0.138874	-0.000650999	-0.00538911	0.0234592	0.485661	-0.0171969	0.0702638	0.0031825	0.00428406	0.0101319	0.0195292	0.00679228	0.00435587	0.0210641	0.0352071	0.00915467	0.00500405	0.0130729	0.0226872	0.00433754	0.010525	0.0408971	0.0457195	0.0807427	0.00155885	0.00381128	-0.000830089	0.178557	0	0.565926	0.0335301	0.0307823	0.348572
0.0483602	0.72976	0.134899	0.00587679	0.138758	-0.000650999	-0.00597147	0.0259688	0.489705	-0.0185753	0.072915	0.00334979	0.00428354	0.0101336	0.0195316	0.00679271	0.00435784	0.0214012	0.0352186	0.00944358	0.005038	0.0131714	0.0228576	0.00438039	0.0105242	0.0408971	0.0457193	0.080743	0.00155885	0.00381128	-0.000830089	0.178557	0	0.583399	0.0345454	0.0314897	0.343456
0.0478944	0.729728	0.134352	0.00533712	0.138696	-0.000650999	-0.00630648	0.0276834	0.491684	-0.0188211	0.0745776	0.0034411	0.00428326	0.0101346	0.0195329	0.00679295	0.00435892	0.0215852	0.0352249	0.00960127	0.00505653	0.0132251	0.0229506	0.00440379	0.0105238	0.040897	0.0457192	0.0807431	0.00155885	0.00381128	-0.000830089	0.178557	0	0.584098	0.034591	0.0312762	0.341722
0.0478266	0.729584	0.133791	0.00500043	0.138648	-0.000650999	-0.00656934	0.0291756	0.493049	-0.0187176	0.0759566	0.00351007	0.00428305	0.0101353	0.0195339	0.00679312	0.00435974	0.0217242	0.0352296	0.00972038	0.00507052	0.0132657	0.0230208	0.00442146	0.0105235	0.040897	0.0457191	0.0807433	0.00155885	0.00381128	-0.000830089	0.178557	0	0.579861	0.0343696	0.0307917	0.340974
0.046443	0.729717	0.133142	0.00402764	0.138548	-0.000650999	-0.00709094	0.0316209	0.496418	-0.0195532	0.0784314	0.00365631	0.00428259	0.0101368	0.019536	0.0067935	0.00436147	0.0220189	0.0352397	0.00997294	0.0051002	0.0133518	0.0231697	0.00445892	0.0105228	0.040897	0.0457189	0.0807435	0.00155885	0.00381128	-0.000830089	0.178557	0	0.591831	0.0351364	0.0311557	0.336852
0.0449228	0.729858	0.132427	0.00296565	0.138437	-0.000650999	-0.00766199	0.0343031	0.500099	-0.0204578	0.0811434	0.00381632	0.0042821	0.0101385	0.0195382	0.00679391	0.00436336	0.0223413	0.0352507	0.0102493	0.00513268	0.013446	0.0233327	0.00449991	0.0105221	0.0408969	0.0457187	0.0807438	0.00155885	0.00381128	-0.000830089	0.178557	0	0.606287	0.0360824	0.0316288	0.332164
0.0460947	0.729363	0.131865	0.00330989	0.138444	-0.000650999	-0.00767099	0.0349563	0.499374	-0.0192387	0.0814962	0.00380773	0.00428212	0.0101384	0.0195381	0.00679389	0.00436326	0.022324	0.0352501	0.0102345	0.00513093	0.013441	0.0233239	0.00449771	0.0105221	0.0408969	0.0457187	0.0807437	0.00155885	0.00381128	-0.000830089	0.178557	0	0.585351	0.0349508	0.0302491	0.334791
0.0460448	0.865798	0.422612	-0.00423744	-0.369225	0.0137428	0.0362254	-0.177007	0.296418	0.39069	-0.130418	0.00387591	0.00428191	0.0101391	0.0195391	0.00679406	0.00436406	0.0224614	0.0352548	0.0103522	0.00514477	0.0134811	0.0233934	0.00451518	0.0105218	0.0408969	0.0457186	0.0807439	0.00155885	0.00381128	-0.000830089	0.178557	0	0.580372	0.0347977	0.0296966	0.199651
0.0475119	0.720495	0.178982	-0.0116581	0.128355	0.00161289	0.0108158	-0.00334532	0.481507	0.0288447	0.0649885	0.00385369	0.00428198	0.0101389	0.0195387	0.00679401	0.0043638	0.0224166	0.0352533	0.0103138	0.00514026	0.013468	0.0233707	0.00450948	0.0105219	0.0408969	0.0457187	0.0807438	0.00155885	0.00381128	-0.000830089	0.178557	0	0.556919	0.0335611	0.028203	0.316819
0.0453758	0.719225	0.181478	-0.0150548	0.128688	0.00175798	0.0116835	-0.00339718	0.484889	0.0306201	0.0675041	0.00404784	0.00428138	0.0101409	0.0195415	0.00679451	0.00436609	0.0228079	0.0352666	0.0106491	0.00517966	0.0135823	0.0235685	0.00455922	0.010521	0.0408969	0.0457184	0.0807441	0.00155885	0.00381128	-0.000830089	0.178557	0	0.575152	0.0352439	0.028752	0.309578
0.0469602	0.718237	0.181055	-0.0153401	0.129055	0.00174934	0.0118827	-0.00354625	0.483655	0.0318156	0.0677031	0.00401612	0.00428148	0.0101406	0.019541	0.00679442	0.00436572	0.0227439	0.0352644	0.0105944	0.00517323	0.0135637	0.0235362	0.0045511	0.0105211	0.0408969	0.0457185	0.0807441	0.00155885	0.00381128	-0.000830089	0.178557	0	0.538296	0.0353298	0.0262585	0.314859
0.0445179	0.716871	0.183987	-0.0190333	0.129454	0.00191853	0.0128829	-0.00366397	0.487472	0.0337723	0.0704133	0.00423338	0.0042808	0.0101429	0.0195441	0.00679498	0.00436829	0.0231818	0.0352794	0.0109696	0.00521732	0.0136916	0.0237574	0.00460676	0.0105201	0.0408968	0.0457182	0.0807445	0.00155885	0.00381128	-0.000830089	0.178557	0	0.553421	0.0381886	0.0263992	0.307473
0.0448631	0.715821	0.184684	-0.0202421	0.129851	0.00196865	0.0133444	-0.00385314	0.487776	0.0351639	0.0712717	0.00427599	0.00428067	0.0101433	0.0195447	0.00679509	0.00436879	0.0232676	0.0352823	0.0110432	0.00522597	0.0137166	0.0238008	0.00461767	0.0105199	0.0408968	0.0457181	0.0807445	0.00155885	0.00381128	-0.000830089	0.178557	0	0.541699	0.0380535	0.0254355	0.307561
0.0468292	0.715068	0.184124	-0.019948	0.13021	0.00195035	0.0134708	-0.00407475	0.486149	0.0360931	0.0710087	0.00421923	0.00428085	0.0101427	0.0195439	0.00679495	0.00436812	0.0231532	0.0352784	0.0109451	0.00521445	0.0136832	0.023743	0.00460313	0.0105202	0.0408968	0.0457182	0.0807444	0.00155885	0.00381128	-0.000830089	0.178557	0	-6.47076	-0.407185	-0.345638	1.30321
0.0449894	0.713751	0.186779	-0.0230023	0.130684	0.00210515	0.014427	-0.00431356	0.489185	0.0380086	0.0732039	0.00439807	0.00428029	0.0101446	0.0195465	0.00679541	0.00437023	0.0235136	0.0352907	0.011254	0.00525074	0.0137885	0.0239251	0.00464895	0.0105193	0.0408968	0.045718	0.0807447	0.00155885	0.00381128	-0.000830089	0.178557	0	0	0	0	0.380282
0.0453964	0.712835	0.187641	-0.0239689	0.131103	0.00216247	0.0149078	-0.00458669	0.489496	0.0392861	0.0738461	0.00443724	0.00428017	0.010145	0.019547	0.00679551	0.0043707	0.0235926	0.0352934	0.0113216	0.00525869	0.0138116	0.023965	0.00465898	0.0105192	0.0408968	0.045718	0.0807448	0.00155885	0.00381128	-0.000830089	0.178557	0	0	0	0	0.378685
0.0429868	0.71134	0.191126	-0.0276452	0.131685	0.00236286	0.0161094	-0.00492811	0.493428	0.0415325	0.0764625	0.00466316	0.00427947	0.0101474	0.0195502	0.00679609	0.00437337	0.0240478	0.0353089	0.0117118	0.00530454	0.0139446	0.0241951	0.00471686	0.0105181	0.0408967	0.0457177	0.0807452	0.00155885	0.00381128	-0.000830089	0.178557	0	0	0	0	0.372795
0.0468698	0.711282	0.189041	-0.025129	0.131919	0.00225724	0.0157445	-0.00519977	0.489469	0.0415019	0.0745276	0.00447729	0.00428005	0.0101454	0.0195476	0.00679561	0.00437117	0.0236733	0.0352961	0.0113908	0.00526682	0.0138352	0.0240058	0.00466924	0.010519	0.0408968	0.0457179	0.0807449	0.00155885	0.00381128	-0.000830089	0.178557	0	0	0	0	0.376342
0.0449655	0.709967	0.192115	-0.0280502	0.13251	0.00243449	0.0168289	-0.00561269	0.492594	0.0435199	0.0765572	0.00466008	0.00427948	0.0101473	0.0195502	0.00679608	0.00437333	0.0240416	0.0353087	0.0117065	0.00530392	0.0139428	0.024192	0.00471607	0.0105181	0.0408967	0.0457177	0.0807452	0.00155885	0.00381128	-0.000830089	0.178557	0	0	0	0	0.371357
0.0452911	0.709196	0.193345	-0.0288321	0.132972	0.0025096	0.0173784	-0.00600783	0.4931	0.0447048	0.0770096	0.00470437	0.00427934	0.0101478	0.0195508	0.00679619	0.00437385	0.0241309	0.0353117	0.011783	0.00531291	0.0139688	0.0242371	0.00472742	0.0105179	0.0408967	0.0457176	0.0807452	0.00155885	0.00381128	-0.000830089	0.178557	0	0	0	0	0.369566
0.0431281	0.707776	0.197035	-0.0320336	0.133673	0.00272052	0.0186495	-0.00654962	0.496731	0.0469543	0.0791978	0.0049137	0.00427869	0.01015	0.0195538	0.00679673	0.00437633	0.0245527	0.0353261	0.0121445	0.00535539	0.0140921	0.0244503	0.00478104	0.0105169	0.0408967	0.0457174	0.0807456	0.00155885	0.00381128	-0.000830089	0.178557	0	0	0	0	0.363837
0.0444467	0.70737	0.19744	-0.0316421	0.134066	0.00274855	0.0189351	-0.00696637	0.495991	0.0476318	0.0787694	0.00488923	0.00427877	0.0101497	0.0195534	0.00679667	0.00437604	0.0245034	0.0353244	0.0121023	0.00535042	0.0140777	0.0244253	0.00477477	0.0105171	0.0408967	0.0457174	0.0807456	0.00155885	0.00381128	-0.000830089	0.178557	0	0	0	0	0.363628
0.0467694	0.707287	0.197046	-0.0303419	0.134352	0.00273097	0.0189569	-0.00733514	0.494253	0.0478286	0.0776822	0.00480883	0.00427902	0.0101489	0.0195523	0.00679646	0.00437509	0.0243414	0.0353189	0.0119634	0.00533411	0.0140303	0.0243435	0.00475418	0.0105174	0.0408967	0.0457175	0.0807454	0.00155885	0.00381128	-0.000830089	0.178557	0	0	0	0	0.364796
0.046626	0.706566	0.199008	-0.0312928	0.134892	0.00284386	0.019681	-0.00787416	0.495414	0.0490754	0.0781984	0.00488252	0.00427879	0.0101497	0.0195533	0.00679665	0.00437596	0.0244899	0.035324	0.0120907	0.00534906	0.0140737	0.0244185	0.00477305	0.0105171	0.0408967	0.0457174	0.0807455	0.00155885	0.00381128	-0.000830089	0.178557	0	0	0	0	0.362232
0.0460384	0.705755	0.201484	-0.0325751	0.135501	0.00298479	0.0205544	-0.00848804	0.497098	0.0505076	0.0789307	0.00498328	0.00427848	0.0101507	0.0195547	0.00679691	0.00437715	0.0246929	0.0353309	0.0122647	0.00536951	0.014133	0.0245211	0.00479887	0.0105166	0.0408966	0.0457173	0.0807457	0.00155885	0.00381128	-0.000830089	0.178557	0	0	0	0	0.358969
0.0428787	0.704134	0.206829	-0.0363348	0.136503	0.00328554	0.0223157	-0.0094149	0.501984	0.0532966	0.0813835	0.00525685	0.00427763	0.0101536	0.0195586	0.00679761	0.00438038	0.0252442	0.0353497	0.0127371	0.00542503	0.0142941	0.0247997	0.00486895	0.0105153	0.0408966	0.045717	0.0807462	0.00155885	0.00381128	-0.000830089	0.178557	0	0	0	0	0.35136
0.0415655	0.703082	0.210582	-0.0383163	0.137324	0.00349651	0.0235754	-0.0102642	0.504813	0.0552256	0.0825441	0.00541792	0.00427713	0.0101553	0.0195609	0.00679802	0.00438229	0.0255688	0.0353608	0.0130153	0.00545772	0.0143889	0.0249638	0.00491021	0.0105146	0.0408965	0.0457168	0.0807464	0.00155885	0.00381128	-0.000830089	0.178557	0	0	0	0	0.346464
0.04315	0.703127	0.210977	-0.0371229	0.137674	0.00351878	0.0237663	-0.0107867	0.503797	0.0554006	0.0814676	0.00536799	0.00427728	0.0101548	0.0195602	0.0067979	0.0043817	0.0254682	0.0353573	0.0129291	0.00544759	0.0143595	0.0249129	0.00489742	0.0105148	0.0408965	0.0457168	0.0807463	0.00155885	0.00381128	-0.000830089	0.178557	0	0	0	0	0.346839
0.0428446	0.702541	0.213717	-0.0378438	0.138356	0.00367138	0.0246811	-0.0115921	0.505317	0.0566588	0.0817046	0.00545462	0.00427701	0.0101557	0.0195614	0.00679812	0.00438272	0.0256428	0.0353633	0.0130787	0.00546517	0.0144105	0.0250011	0.00491961	0.0105144	0.0408965	0.0457167	0.0807465	0.00155885	0.00381128	-0.000830089	0.178557	0	0	0	0	0.343751
0.044285	0.70262	0.214458	-0.0367682	0.138729	0.00371134	0.0249485	-0.0121659	0.504664	0.0568462	0.0806919	0.00542087	0.00427712	0.0101553	0.0195609	0.00679803	0.00438232	0.0255747	0.035361	0.0130204	0.00545832	0.0143907	0.0249668	0.00491097	0.0105146	0.0408965	0.0457168	0.0807464	0.00155885	0.00381128	-0.000830089	0.178557	0	0	0	0	0.343738
0.0441034	0.702184	0.21721	-0.0371963	0.139406	0.00386291	0.0258385	-0.0130205	0.506073	0.0579439	0.0806888	0.00549809	0.00427688	0.0101561	0.019562	0.00679823	0.00438324	0.0257304	0.0353663	0.0131538	0.00547399	0.0144361	0.0250454	0.00493075	0.0105142	0.0408965	0.0457167	0.0807466	0.00155885	0.00381128	-0.000830089	0.178557	0	0	0	0	0.340849
0.0422109	0.701184	0.222302	-0.0391797	0.140468	0.00414419	0.0274566	-0.0142571	0.509714	0.0600806	0.0816955	0.0056956	0.00427626	0.0101582	0.0195648	0.00679874	0.00438557	0.0261284	0.0353799	0.0134949	0.00551407	0.0145524	0.0252465	0.00498135	0.0105133	0.0408965	0.0457164	0.0807469	0.00155885	0.00381128	-0.000830089	0.178557	0	0	0	0	0.334757
0.0441177	0.701598	0.222573	-0.0374382	0.140734	0.00415543	0.0275293	-0.0147934	0.508523	0.0598085	0.0801961	0.00562737	0.00427648	0.0101575	0.0195639	0.00679856	0.00438476	0.0259909	0.0353752	0.013377	0.00550023	0.0145122	0.0251771	0.00496387	0.0105136	0.0408965	0.0457165	0.0807468	0.00155885	0.00381128	-0.000830089	0.178557	0	0	0	0	0.335642
0.0424755	0.700805	0.22765	-0.0389321	0.141804	0.0044337	0.0291108	-0.0161182	0.511899	0.0617286	0.0808014	0.00580661	0.00427592	0.0101593	0.0195664	0.00679902	0.00438688	0.0263521	0.0353875	0.0136866	0.0055366	0.0146178	0.0253596	0.00500979	0.0105128	0.0408964	0.0457163	0.0807471	0.00155885	0.00381128	-0.000830089	0.178557	0	0	0	0	0.329916
0.0406906	0.699977	0.233367	-0.0405249	0.142996	0.00474631	0.0308765	-0.0176166	0.515691	0.0638146	0.081412	0.00600622	0.0042753	0.0101614	0.0195692	0.00679954	0.00438924	0.0267543	0.0354012	0.0140313	0.00557711	0.0147353	0.0255629	0.00506093	0.0105119	0.0408964	0.0457161	0.0807474	0.00155885	0.00381128	-0.000830089	0.178557	0	0	0	0	0.323558
0.0444852	0.701238	0.230915	-0.0368474	0.142746	0.00460408	0.0300463	-0.0176798	0.512017	0.0620958	0.0786472	0.00579833	0.00427595	0.0101593	0.0195663	0.006799	0.00438678	0.0263354	0.0353869	0.0136723	0.00553492	0.0146129	0.0253512	0.00500767	0.0105128	0.0408964	0.0457163	0.0807471	0.00155885	0.00381128	-0.000830089	0.178557	0	0	0	0	0.328253
0.0421909	0.700418	0.237453	-0.0385048	0.144083	0.00495999	0.032035	-0.0194026	0.516343	0.0643339	0.079216	0.00602264	0.00427525	0.0101616	0.0195695	0.00679958	0.00438944	0.0267874	0.0354023	0.0140597	0.00558045	0.0147449	0.0255796	0.00506513	0.0105118	0.0408964	0.045716	0.0807474	0.00155885	0.00381128	-0.000830089	0.178557	0	0	0	0	0.321109
0.0422983	0.700481	0.240637	-0.0379857	0.144817	0.0051288	0.0329499	-0.0205307	0.517623	0.064977	0.0783907	0.00607992	0.00427507	0.0101622	0.0195703	0.00679973	0.00439011	0.0269029	0.0354063	0.0141586	0.00559207	0.0147787	0.0256379	0.00507981	0.0105115	0.0408964	0.045716	0.0807475	0.00155885	0.00381128	-0.000830089	0.178557	0	0	0	0	0.318518
0.0427596	0.700721	0.243351	-0.0370861	0.145458	0.00527079	0.0337023	-0.0215819	0.518466	0.0653355	0.0773098	0.00611182	0.00427497	0.0101625	0.0195707	0.00679981	0.00439049	0.0269672	0.0354085	0.0142137	0.00559855	0.0147974	0.0256704	0.00508798	0.0105114	0.0408963	0.0457159	0.0807476	0.00155885	0.00381128	-0.000830089	0.178557	0	0	0	0	0.316618
0.0424468	0.700765	0.24743	-0.0367204	0.146344	0.00548708	0.0348629	-0.0229356	0.520384	0.0661688	0.076508	0.00619938	0.0042747	0.0101635	0.019572	0.00680003	0.00439152	0.0271436	0.0354145	0.0143649	0.00561632	0.014849	0.0257596	0.00511041	0.010511	0.0408963	0.0457158	0.0807477	0.00155885	0.00381128	-0.000830089	0.178557	0	0	0	0	0.31312
0.0440106	0.701447	0.248508	-0.0348611	0.146659	0.00553753	0.03508	-0.0236571	0.519866	0.0657221	0.0748363	0.00615548	0.00427484	0.010163	0.0195713	0.00679992	0.00439101	0.0270551	0.0354115	0.0142891	0.00560741	0.0148231	0.0257149	0.00509916	0.0105112	0.0408963	0.0457159	0.0807477	0.00155885	0.00381128	-0.000830089	0.178557	0	0	0	0	0.313366
0.0426248	0.701307	0.254608	-0.0350448	0.147913	0.00586278	0.0368285	-0.0255039	0.523253	0.06715	0.0742494	0.00631681	0.00427434	0.0101647	0.0195736	0.00680033	0.00439291	0.0273802	0.0354225	0.0145677	0.00564015	0.0149181	0.0258792	0.00514049	0.0105104	0.0408963	0.0457157	0.0807479	0.00155885	0.00381128	-0.000830089	0.178557	0	0	0	0	0.307672
0.0427671	0.701688	0.258266	-0.0340239	0.148699	0.00605299	0.0378074	-0.0268313	0.524672	0.067532	0.0729643	0.00637176	0.00427417	0.0101653	0.0195744	0.00680048	0.00439356	0.027491	0.0354263	0.0146626	0.0056513	0.0149505	0.0259351	0.00515457	0.0105101	0.0408963	0.0457156	0.080748	0.00155885	0.00381128	-0.000830089	0.178557	0	0	0	0	0.305016
0.0436394	0.702319	0.260703	-0.032455	0.149242	0.0061757	0.0384001	-0.0278832	0.525155	0.0673957	0.0713761	0.006376	0.00427415	0.0101653	0.0195745	0.00680049	0.00439361	0.0274995	0.0354266	0.01467	0.00565216	0.014953	0.0259395	0.00515566	0.0105101	0.0408963	0.0457156	0.080748	0.00155885	0.00381128	-0.000830089	0.178557	0	0	0	0	0.303805
0.0436743	0.702787	0.264741	-0.0313347	0.150082	0.006385	0.0394639	-0.0293282	0.526792	0.0677531	0.0699679	0.00643873	0.00427396	0.010166	0.0195754	0.00680065	0.00439435	0.0276259	0.0354309	0.0147783	0.00566489	0.0149899	0.0260033	0.00517173	0.0105098	0.0408963	0.0457155	0.0807481	0.00155885	0.00381128	-0.000830089	0.178557	0	0	0	0	0.300839
0.0441893	0.703426	0.267999	-0.0298568	0.150764	0.00655103	0.0402777	-0.0305954	0.527838	0.0677653	0.0683608	0.0064691	0.00427386	0.0101663	0.0195758	0.00680073	0.00439471	0.0276871	0.035433	0.0148307	0.00567105	0.0150078	0.0260343	0.00517951	0.0105097	0.0408963	0.0457155	0.0807482	0.00155885	0.00381128	-0.000830089	0.178557	0	0	0	0	0.298826
0.0442968	0.704034	0.272112	-0.0285097	0.151601	0.00676262	0.0413322	-0.032089	0.529457	0.0679798	0.0667613	0.00652706	0.00427368	0.0101669	0.0195766	0.00680087	0.0043954	0.0278039	0.035437	0.0149309	0.00568282	0.0150419	0.0260933	0.00519436	0.0105094	0.0408962	0.0457154	0.0807483	0.00155885	0.00381128	-0.000830089	0.178557	0	0	0	0	0.295953
0.0423445	0.704323	0.280538	-0.0279991	0.153267	0.00720624	0.0436426	-0.0347245	0.533945	0.0694073	0.0653366	0.00672773	0.00427306	0.010169	0.0195795	0.00680139	0.00439777	0.0282083	0.0354508	0.0152774	0.00572354	0.01516	0.0262977	0.00524576	0.0105085	0.0408962	0.0457152	0.0807486	0.00155885	0.00381128	-0.000830089	0.178557	0	0	0	0	0.288619
0.0439671	0.70536	0.281776	-0.025726	0.153528	0.00726067	0.0438146	-0.0355036	0.533539	0.0685713	0.063323	0.00667934	0.00427321	0.0101685	0.0195788	0.00680127	0.0043972	0.0281108	0.0354475	0.0151938	0.00571372	0.0151315	0.0262484	0.00523337	0.0105087	0.0408962	0.0457152	0.0807485	0.00155885	0.00381128	-0.000830089	0.178557	0	0	0	0	0.288979
0.0438921	0.706153	0.286642	-0.0241118	0.154485	0.00750995	0.0450382	-0.0372495	0.535529	0.068729	0.0614203	0.00674952	0.00427299	0.0101692	0.0195798	0.00680145	0.00439803	0.0282522	0.0354523	0.015315	0.00572797	0.0151729	0.0263199	0.00525135	0.0105084	0.0408962	0.0457152	0.0807487	0.00155885	0.00381128	-0.000830089	0.178557	0	0	0	0	0.285618
0.0438378	0.707026	0.291601	-0.022369	0.15545	0.00776328	0.0462711	-0.0390389	0.537537	0.068817	0.0594029	0.00681831	0.00427278	0.0101699	0.0195807	0.00680162	0.00439884	0.0283909	0.035457	0.0154339	0.00574193	0.0152134	0.0263899	0.00526897	0.0105081	0.0408962	0.0457151	0.0807488	0.00155885	0.00381128	-0.000830089	0.178557	0	0	0	0	0.282264
0.0438872	0.707985	0.296466	-0.0204772	0.156387	0.00801058	0.0474594	-0.0408185	0.539446	0.0687885	0.0572765	0.00688008	0.00427259	0.0101706	0.0195816	0.00680178	0.00439957	0.0285153	0.0354613	0.0155405	0.00575446	0.0152497	0.0264528	0.00528479	0.0105078	0.0408961	0.045715	0.0807489	0.00155885	0.00381128	-0.000830089	0.178557	0	0	0	0	0.279101
0.0440935	0.709028	0.301097	-0.0184392	0.157269	0.00824451	0.0485647	-0.0425463	0.541178	0.0686182	0.0550599	0.00693132	0.00427243	0.0101711	0.0195823	0.00680191	0.00440018	0.0286186	0.0354648	0.015629	0.00576486	0.0152799	0.026505	0.00529792	0.0105075	0.0408961	0.0457149	0.080749	0.00155885	0.00381128	-0.000830089	0.178557	0	0	0	0	0.276249
0.0459875	0.710206	0.302055	-0.0160502	0.157429	0.00828226	0.0486189	-0.0432272	0.540677	0.0675515	0.0529935	0.00687479	0.0042726	0.0101705	0.0195815	0.00680177	0.00439951	0.0285047	0.0354609	0.0155314	0.00575339	0.0152466	0.0264474	0.00528344	0.0105078	0.0408961	0.045715	0.0807489	0.00155885	0.00381128	-0.000830089	0.178557	0	0	0	0	0.276946
0.0441155	0.711307	0.311627	-0.0141074	0.159249	0.00877726	0.0510858	-0.0464042	0.545322	0.0683163	0.0502722	0.00706008	0.00427203	0.0101725	0.0195842	0.00680224	0.0044017	0.0288781	0.0354736	0.0158514	0.00579099	0.0153557	0.0266361	0.00533091	0.0105069	0.0408961	0.0457148	0.0807492	0.00155885	0.00381128	-0.000830089	0.178557	0	0	0	0	0.269588

## Sheet: metabolite abbreviations
metabolite abbreviation	name of metabolite
glc	glucose
ace	acetate
but	butyrate
etOH	ethanol
for	formate
isobut	isobutyrate
isoval	isovalerate
lact	lactate
prop	propionate
suc	succinate
valer	valerate
ala	alanine
arg	arginine
asp	aspartate
asn	asparagine
cys	cysteine
gln	glutamine
glu	glutamate
gly	glycine
his	histidine
ile	isoleucine
leu	leucine
lys	lysine
met	methionine
phe	phenylalanine
pro	proline
ser	serine
thr	threonine
trp	tryptophan
tyr	tyrosine
val	valine
muc	mucin

## Sheet: Chemostat
Table S2_Chemostat. Concentrations of products (positive values) and substrates (negative values) in chemostat experiments (apple pectin + mucin medium) at dilution rates 0.05 and 0.2 1/h. Gas production values are presented as mmol gas produced per L medium. Carbon content in apple pectin was calculated from literature data: 10.1016/j.foodchem.2016.01.012.																																				theoretical consumption of apple pectin (methylated galacturonic acid, GalU, arabinose)			theoretical consumption of mucin carbohydrates (sum of fucose, mannose, galactose, NacGlc, NAcGal and sialic acid)
unit				mM	mM	mM	mM	mM	mM	mM	mM	mM	mM	mM	mM	mM	mM	mM	mM	mM	mM	mM	mM	mM	mM	mM	mM	mM	mM	mM	mM	mM	mM	mM	mM	mM	mM	mM	mM	mM	mM	mM	mM	mM	gDW/L	mM	mM	mM
Experiment	Substrate	D, 1/h	pH	Acetate	Butyrate	Ethanol	Formate	Lactate	Propionate	Succinate	CO2	H2	H2S	Isobutyrate	Isovalerate	Valerate	Ile	Leu	Val	Ala	Arg	Asn	Asp	Gln	Glu	Gly	His	Lys	Met	Phe	Pro	Ser	Thr	Trp	Tyr	Met-GalU	GalU	Ara	fucose	mannose	galactose	NAcGlc	NAcGal	sialic acid	biomass	Carbon in	Carbon out	C unknown
1	Apple pectin	0.05	7	26.8419	4.07207	0	0.752933	0	9.35226	2.39465	18.4649	0.4775	0.658224	0.230531	0.990993	1.43034	-0.241307	-0.516553	-0.0459428	-0.177238	-0.30223	-0.545569	-0.448451	-0.0278209	-0.289803	-0.809204	-0.371148	-0.538092	-0.199668	-0.446701	-0.392023	-1.28535	-0.499614	-0.0657807	-0.149	-5.55556	-5.55556	-2.77778	-0.94262	-0.182753	-2.07761	-1.03881	-3.17413	-2.20265	0.6	-197.92	163.854	17.2117
2	Apple pectin	0.05	7	21.4665	5.38899	0	0	0	9.71361	1.56158	23.0815	1.0953	0.892929	0	1.62762	1.2637	-0.505214	-1.12315	-0.587755	-0.526093	-0.305338	-0.545569	-0.455312	-0.0283962	-0.31936	-0.812336	-0.371148	-0.538484	-0.199668	-0.448885	-0.399383	-1.28705	-0.500407	-0.0657807	-0.149	-5.55556	-5.55556	-2.77778	-0.94262	-0.182753	-2.07761	-1.03881	-3.17413	-2.20265	0.7	-207.168	165.414	20.1547
3	Apple pectin	0.05	7.03	21.422	4.393	0	0	0	9.198	4.59	19.2714	0.790615	0.742782	0.575	0	0.914	-0.349521	-0.681106	-0.269497	-0.697547	-0.308179	-0.545569	-0.451977	-0.0283962	-0.302556	-0.805552	-0.371148	-0.538076	-0.19915	-0.398764	-0.400518	-1.27751	-0.49907	-0.0657807	-0.148209	-5.55556	-5.55556	-2.77778	-0.94262	-0.182753	-2.07761	-1.03881	-3.17413	-2.20265	0.52	-201.92	153.311	24.073
4	Apple pectin	0.2	7	27.4073	2.27518	0.895642	5.94137	1.03572	4.49685	4.73655	7.93007	2.05969	0.277181	0.0261596	0.0487991	0	-0.0892079	-0.224705	0.0739211	-0.00500929	-0.302842	-0.545569	-0.440657	-0.0253703	-0.109784	-0.797065	0.139599	-0.53594	-0.0942234	-0.447542	-0.39224	-1.27898	-0.498306	-0.0657807	-0.148612	-5.55556	-5.55556	-2.77778	-0.94262	-0.182753	-2.07761	-1.03881	-3.17413	-2.20265	0.5	-190.759	136.678	28.3506
5	Apple pectin	0.2	6.97	24.652	1.91	5.322	2.056	0.808	4.196	3.28	10.1792	5.57292	0.358234	0	0	0	-0.0986194	-0.251913	0.0189454	0.0392841	-0.308896	-0.545569	-0.45385	-0.0282305	-0.285522	-0.808286	-0.371148	-0.537547	-0.101992	-0.443919	-0.393609	-1.28655	-0.499995	-0.0657807	-0.149	-5.55556	-5.55556	-2.77778	-0.94262	-0.182753	-2.07761	-1.03881	-3.17413	-2.20265	0.48	-194.251	127.368	34.4313
6	Apple pectin	0.2	6.93	23.541	1.346	3.833	1.799	0.775	3.961	3.581	13.5248	6.91793	0.452534	0	0	0	-0.121141	-0.294813	-0.0183297	-0.0541392	-0.307776	-0.545286	-0.454229	-0.0268925	-0.291774	-0.806504	-0.371148	-0.484072	-0.0828135	-0.139836	-0.398978	-1.28665	-0.500083	-0.0636753	-0.142451	-5.55556	-5.55556	-2.77778	-0.94262	-0.182753	-2.07761	-1.03881	-3.17413	-2.20265	0.5	-191.704	123.988	35.3234
[truncated: 32 more columns]
